# Supplementary material
Source: publisher figshare collection journal article supplement (https://gsapubs.figshare.com/ndownloader/files/24314636)
Supplement: Supplementary file 1 [file 24314636]

## Sheet: Explanation
Table S2. Zircon data used in the study
Worksheet Contents Data Sources for PDP Figures – lists the specific samples utilized in the probability density plots (PDPs) in the text and the sources of data Figures 7 & 8 Data – provides ages and errors in column format for use in statistical analyses of Figures 7 & 8 of the main text Basal McCoy, Big Bear, etc. – provides additional analytical information, inlcuding degree of concordance fo…
Data Filtering Protocol No new analyses are presented in this study; all are from prior publications. However, we reprocessed some datasets so that all results are treated as consistently as possible: (1) We accepted or rejected analyses based on percent concordance irrespective of the protocol used in the data source (e.g., some authors accept or reject analyses based on percent probability of c…
Explanation of column headings
Lab
AtoZ	LA-ICP-MS	Apatite to zircon, Inc.
Calgary	LA-ICP-MS	University of Calgary
CSUN	LA-ICP-MS	California State Univerity, Northridge
Curtin	LA-ICP-MS (split stream)	Curtin University
GEUS	LA-ICP-MS	Geological Survey of Denmark and Greenland
Stanford	SHRIMP-RG ion probe	Stanford/U.S. Geological Survey
UA	LA-ICP-MS	Arizona LaserChron Center
UCLA	Cameca ion probe	University of California, Los Angeles
UCSC	LA-ICP-MS	University of California, Santa Cruz
Th/U	ppm Th/ppm U
6/8 Age	206Pb/238U age
7/6 Age	207Pb/206Pb age
Best Age	as defined above
1 s	± 1 std dev of age in previous column; for probability plots we set 1 std dev to a 1% minimum value
Conc	percent concordance as defined above
Data Source	See the main text for the list of references

## Sheet: Data Sources for PDP Figures
Panel	Full sample name	Abbreviated sample name	Unit	Data source	Notes
Figure 4
BW0609	BW0609	SE1	Sespe clast	Sabbeth et al. (2019)
14LS08	14LS08	SE2	Sespe clast	Sabbeth et al. (2019)
14LS09	14LS09	SE3	Sespe clast	Sabbeth et al. (2019)
14LS11	14LS11	SE4	Sespe clast	Sabbeth et al. (2019)
14LS12	14LS12	SE5	Sespe clast	Sabbeth et al. (2019)
BW1614	BW1614	SE6	Sespe clast	Sabbeth et al. (2019)
BW4609	BW4609	SE7	Sespe clast	Sabbeth et al. (2019)
BW4809	BW4809	SE8	Sespe clast	Sabbeth et al. (2019)
BW1609	BW1609	SE9	Sespe clast	Sabbeth et al. (2019)
BW1809	BW1809	SE10	Sespe clast	Sabbeth et al. (2019)
16LS19	16LS19	SE11	Sespe clast	Sabbeth et al. (2019)
16LS20	16LS20	SE12	Sespe clast	Sabbeth et al. (2019)
Figure 5
14LS08	14LS08	SE2	Sespe clast	Sabbeth et al. (2019)
14LS09	14LS09	SE3	Sespe clast	Sabbeth et al. (2019)
14LS12	14LS12	SE5	Sespe clast	Sabbeth et al. (2019)
BW1614	BW1614	SE6	Sespe clast	Sabbeth et al. (2019)
T02-75-2Z	T02-75-2Z	SH1	Shinumo Ss (Unkar Group)	Bloch et al. (2006)
T01-75-5	T01-75-5	SH2	Shinumo Ss (Unkar Group)	Bloch et al. (2006)
T01-75-4	T01-75-4	SH3	Shinumo Ss (Unkar Group)	Bloch et al. (2006)	Also in Timmons et al. (2005)
K1275L-1	K1275L-1	SH4	Shinumo Ss (Unkar Group)	Mulder et al. (2017)
IC-1-35	IC-1-35	SH5	Shinumo Ss (Unkar Group)	Sabbeth et al. (2019)
T01-76-2	T01-76-2	SH6	Shinumo Ss (Unkar Group)	Bloch et al. (2006)
T01-76-3	T01-76-3	SH7	Shinumo Ss (Unkar Group)	Bloch et al. (2006)
LC-16-76-5	LC-16-76-5	SH8	Shinumo Ss (Unkar Group)	Bloch et al. (2006)
Figure 6
Horse Thief Springs Fm, A-unit	K03DV10	HT8	Horse Thief Springs Fm, A-unit	Mahon et al. (2014)
Horse Thief Springs Fm, A-unit	K03DV09B	HT9	Horse Thief Springs Fm, A-unit	Mahon et al. (2014)
Upper Shinumo Sandstone	T02-75-2Z	SH1	Shinumo Ss (Unkar Group)	Bloch et al. (2006)
Upper Shinumo Sandstone	T01-75-5	SH2	Shinumo Ss (Unkar Group)	Bloch et al. (2006)
Upper Shinumo Sandstone	T01-75-4	SH3	Shinumo Ss (Unkar Group)	Bloch et al. (2006)	Also in Timmons et al. (2005)
Middle Shinumo Sandstone	K1275L-1	SH4	Shinumo Ss (Unkar Group)	Mulder et al. (2017)
Lower Shinumo Sandstone	IC-1-35	SH5	Shinumo Ss (Unkar Group)	Sabbeth et al. (2019)
Lower Shinumo Sandstone	T01-76-2	SH6	Shinumo Ss (Unkar Group)	Bloch et al. (2006)
Lower Shinumo Sandstone	T01-76-3	SH7	Shinumo Ss (Unkar Group)	Bloch et al. (2006)
Lower Shinumo Sandstone	LC-16-76-5	SH8	Shinumo Ss (Unkar Group)	Bloch et al. (2006)
Troy Quartzite	2017-445	TY1	Troy Quartzite	Mulder et al. (2018)
Troy Quartzite	2017-447	TY2	Troy Quartzite	Mulder et al. (2018)
Troy Quartzite	F03-5-6	TY3	Troy Quartzite	Mulder et al. (2017)
Troy Quartzite	Troy Quartzite	TY4	Troy Quartzite	Stewart et al. (2001)
Troy Quartzite	F03-5-11	TY5	Troy Quartzite	Mulder et al. (2017)
Dripping Springs Qtzte	K16-salt-2	DS1	Dripping Springs Qtzte	Mulder et al. (2017)
Dripping Springs Qtzte	F03-5-21	DS2	Dripping Springs Qtzte	Mulder et al. (2017)
Dripping Springs Qtzte	F03-5-1	DS3	Dripping Springs Qtzte	Mulder et al. (2017)
Dripping Springs Qtzte	Dripping Springs Quartzite	DS4	Dripping Springs Qtzte	Stewart et al. (2001)
Figure 9
Unimodal Sespe clasts	BW1809	SE10	Sespe clast	Sabbeth et al. (2019)
Unimodal Sespe clasts	16LS19	SE11	Sespe clast	Sabbeth et al. (2019)
Unimodal Sespe clasts	16LS20	SE12	Sespe clast	Sabbeth et al. (2019)
Pinto Mtn Group	JW333	PM1	Pinto Mtn Group	Barth et al. (2009)
Pinto Mtn Group	JW335	PM2	Pinto Mtn Group	Barth et al. (2009)
Pinto Mtn Group	JW337	PM3	Pinto Mtn Group	Barth et al. (2009)
Pinto Mtn Group	JW338	PM4	Pinto Mtn Group	Barth et al. (2009)
White Ledges Fm	WL00308	WL1	White Ledges Fm	Doe et al. (2012)
White Ledges Fm	WL00208	WL2	White Ledges Fm	Doe et al. (2012)
White Ledges Fm	WL1	WL3	White Ledges Fm	Doe et al. (2012)
Figure 10
Sespe Clast BW4609	BW4609	SE07	Sespe clast	Sabbeth et al. (2019)
Tapeats Sandstone	Tapeats 2	TP02	Tapeats Sandstone	Gehrels et al. (2011)
Zabriskie Quartzite	98-236	ZB01	Zabriskie Quartzite	Barth et al. (2009)
Zabriskie Quartzite	Zabriskie	ZB02	Zabriskie Quartzite	Gehrels & Pecha (2014)
Horse Thief Springs Fm E & F units	4CD11	HT01	Horse Thief Springs Fm F unit	Mahon et al. (2014)
Horse Thief Springs Fm E & F units	5CD11	HT02	Horse Thief Springs Fm F unit	Mahon et al. (2014)
Horse Thief Springs Fm E & F units	K03DV21	HT03	Horse Thief Springs Fm F unit	Mahon et al. (2014)
Horse Thief Springs Fm E & F units	12RMSS6	HT04	Horse Thief Springs Fm E unit	Mahon et al. (2014)
Horse Thief Springs Fm, A-unit	12CDDV9	HT05	Horse Thief Springs Fm, A-unit	Mahon et al. (2014)
Horse Thief Springs Fm, A-unit	12RMSS5	HT06	Horse Thief Springs Fm, A-unit	Mahon et al. (2014)
Horse Thief Springs Fm, A-unit	K03DV11	HT07	Horse Thief Springs Fm, A-unit	Mahon et al. (2014)
Horse Thief Springs Fm, A-unit	K03DV10	HT08	Horse Thief Springs Fm, A-unit	Mahon et al. (2014)
Horse Thief Springs Fm, A-unit	K03DV09B	HT09	Horse Thief Springs Fm, A-unit	Mahon et al. (2014)
Figure 11
Sespe Clast BW4809	BW4809	SE08	Sespe clast	Sabbeth et al. (2019)
Tapeats Sandstone	Tapeats F	TP03	Tapeats Sandstone	Karlstrom et al. (2018)
Tapeats Sandstone	Tapeats G	TP04	Tapeats Sandstone	Karlstrom et al. (2018)
Tapeats Sandstone	Tapeats H	TP05	Tapeats Sandstone	Karlstrom et al. (2018)
Figure 13
Oligocene–Miocene Sespe Fm	SH5	n/a	Sespe Fm	Ingersoll et al. (2018)
Oligocene–Miocene Sespe Fm	SM7	n/a	Sespe Fm	Ingersoll et al. (2018)
Oligocene–Miocene Sespe Fm	SYW1	n/a	Sespe Fm	Ingersoll et al. (2018)
Oligocene–Miocene Sespe Fm	SYW3	n/a	Sespe Fm	Ingersoll et al. (2018)
Oligocene–Miocene Sespe Fm	SYE1	n/a	Sespe Fm	Ingersoll et al. (2018)
Oligocene–Miocene Sespe Fm	SYE4	n/a	Sespe Fm	Ingersoll et al. (2018)
Oligocene–Miocene Sespe Fm	SYE7	n/a	Sespe Fm	Ingersoll et al. (2018)
Eocene Sespe Fm	SA2	n/a	Sespe Fm	Ingersoll et al. (2018)
Eocene Sespe Fm	SA3	n/a	Sespe Fm	Ingersoll et al. (2018)
Eocene Sespe Fm	SA6	n/a	Sespe Fm	Ingersoll et al. (2018)
Eocene Sespe Fm	SH4	n/a	Sespe Fm	Ingersoll et al. (2018)
Eocene Sespe Fm	SM5	n/a	Sespe Fm	Ingersoll et al. (2018)
Eocene Sespe Fm	SYE2	n/a	Sespe Fm	Ingersoll et al. (2018)
Eocene Sespe Fm	SYE3	n/a	Sespe Fm	Ingersoll et al. (2018)
Eocene Sespe Fm	SYE5	n/a	Sespe Fm	Ingersoll et al. (2018)
Eocene Sespe Fm	SYE6	n/a	Sespe Fm	Ingersoll et al. (2018)
25–17 Ma Rainbow Gdn Mbr, Horse Sp Fm	K14-RBGN-1	n/a	Rainbow Garden Fm	Lamb et al. (2018)
25–17 Ma Rainbow Gdn Mbr, Horse Sp Fm	K14-RBGN-3	n/a	Rainbow Garden Fm	Lamb et al. (2018)
25–17 Ma Rainbow Gdn Mbr, Horse Sp Fm	K14-RBGN-5	n/a	Rainbow Garden Fm	Lamb et al. (2018)
25–17 Ma Rainbow Gdn Mbr, Horse Sp Fm	K14-RBGN-7	n/a	Rainbow Garden Fm	Lamb et al. (2018)
25–17 Ma Rainbow Gdn Mbr, Horse Sp Fm	K14-RBGN-8	n/a	Rainbow Garden Fm	Lamb et al. (2018)
Mississippian to Permian strata of Grand Canyon	Kaibab 1	n/a	Kaibab Limestone	Gehrels et al. (2011)
Mississippian to Permian strata of Grand Canyon	Kaibab 2	n/a	Kaibab Limestone	Gehrels et al. (2011)
Mississippian to Permian strata of Grand Canyon	Toroweap 2	n/a	Toroweap Fm	Gehrels et al. (2011)
Mississippian to Permian strata of Grand Canyon	Toroweap 1	n/a	Toroweap Fm	Gehrels et al. (2011)
Mississippian to Permian strata of Grand Canyon	Coconino 2	n/a	Coconino Sandstone	Gehrels et al. (2011)
Mississippian to Permian strata of Grand Canyon	Coconino 1	n/a	Coconino Sandstone	Gehrels et al. (2011)
Mississippian to Permian strata of Grand Canyon	Upper Hermit	n/a	Hermit Fm	Gehrels et al. (2011)
Mississippian to Permian strata of Grand Canyon	Hermit	n/a	Hermit Fm	Gehrels et al. (2011)
Mississippian to Permian strata of Grand Canyon	Lower Hermit	n/a	Hermit Fm	Gehrels et al. (2011)
Mississippian to Permian strata of Grand Canyon	Esplanade 3	n/a	Esplanade Sandstone	Gehrels et al. (2011)
Mississippian to Permian strata of Grand Canyon	Esplanade 2	n/a	Esplanade Sandstone	Gehrels et al. (2011)
Mississippian to Permian strata of Grand Canyon	Esplanade 1	n/a	Esplanade Sandstone	Gehrels et al. (2011)
Mississippian to Permian strata of Grand Canyon	Wescogame	n/a	Wescogame Fm	Gehrels et al. (2011)
Mississippian to Permian strata of Grand Canyon	Manacacha	n/a	Manacacha Fm	Gehrels et al. (2011)
Mississippian to Permian strata of Grand Canyon	Watahomigi	n/a	Watahomigi Fm	Gehrels et al. (2011)
Mississippian to Permian strata of Grand Canyon	Surprise Canyon 3	n/a	Surprise Canyon Fm	Gehrels et al. (2011)
Mississippian to Permian strata of Grand Canyon	Surprise Canyon 2	n/a	Surprise Canyon Fm	Gehrels et al. (2011)
Mississippian to Permian strata of Grand Canyon	Surprise Canyon Conglomerate	n/a	Surprise Canyon Fm	Gehrels et al. (2011)
Cambrian & Devonian strata of Grand Canyon	Temple Butte 3	n/a	Temple Butte Fm	Gehrels et al. (2011)
Cambrian & Devonian strata of Grand Canyon	Temple Butte 2	n/a	Temple Butte Fm	Gehrels et al. (2011)
Cambrian & Devonian strata of Grand Canyon	Temple Butte 1	n/a	Temple Butte Fm	Gehrels et al. (2011)
Cambrian & Devonian strata of Grand Canyon	Upper Bright Angel	n/a	Bright Angel Shale	Gehrels et al. (2011)
Cambrian & Devonian strata of Grand Canyon	Bright Angel	n/a	Bright Angel Shale	Gehrels et al. (2011)
Cambrian & Devonian strata of Grand Canyon	Lower Bright Angel	n/a	Bright Angel Shale	Gehrels et al. (2011)
Cambrian & Devonian strata of Grand Canyon	Tapeats 2	n/a	Tapeats Sandstone	Gehrels et al. (2011)
Cambrian & Devonian strata of Grand Canyon	Tapeats 1	n/a	Tapeats Sandstone	Gehrels et al. (2011)
Cambrian & Devonian strata of Grand Canyon	Tapeats F	TP03	Tapeats Sandstone	Karlstrom et al. (2018)
Figure 14
Sespe Clast 14LS11	14LS11	SE04	Sespe clast	Sabbeth et al. (2019)
Sespe Clast BW1609	BW1609	SE09	Sespe clast	Sabbeth et al. (2019)
Morrison Fm CP13	CP13	MO1	Morrison Fm	Dickinson & Gehrels (2008)
Morrison Fm CP21	CP21	MO2	Morrison Fm	Dickinson & Gehrels (2008)
Basal McCoy Mtns Fm	MC7	n/a	McCoy Mtns Fm	Barth et al. (2004)
Basal McCoy Mtns Fm	MC9	n/a	McCoy Mtns Fm	Barth et al. (2004)
Basal McCoy Mtns Fm	3-24-04-1,2	n/a	McCoy Mtns Fm	Spencer et al. (2011)	two nearby samples pooled prior to analysis
Basal McCoy Mtns Fm	3-24-04-3A,3B	n/a	McCoy Mtns Fm	Spencer et al. (2011)	two nearby samples pooled prior to analysis
Basal McCoy Mtns Fm	3-25-04-4	n/a	McCoy Mtns Fm	Spencer et al. (2011)	two nearby samples pooled prior to analysis
Basal McCoy Mtns Fm	3-25-04-7,8	n/a	McCoy Mtns Fm	Spencer et al. (2011)

## Sheet: Figures 7 & 8 Data
See columns B & C of the "Data Sources for PDP Figures" worksheet for explanation of the sample-name abbreviations
Sample names without numbers are composites of the numbered samples with the same two-letter prefix
Ages in Ma, 1s = 1 std dev
TY1	1s	TY2	1s	TY3	1s	TY4	1s	TY5	1s	TY	1s	WL1	1s	WL2	1s	WL3	1s	WL	1s	DS1	1s	DS2	1s	DS3	1s	DS4	1s	DS	1s	SH1	1s	SH2	1s	SH3	1s	SH4	1s	SH5	1s	SH6	1s	SH7	1s	SH8	1s	SH	1s	HT1	1s
1064	27	980	24.5	1339.45	18.6084	1238	11	1202.05	59.0266	1064	27	1528	5.5	2438	3.5	1825	15	1528	5.5	1284.7	20.3	1452.35	20.9359	1344.82	72.7699	1232	23	1284.7	20.3	1140	45	1031	20	1117	117	1150.43	52.4146	614.88	11.99	1200	20	1174	151	1184	37	1140	45	774.5	10.3
1318	15	1348	17	1371.37	81.9667	1246	21	1208.54	54.9894	1318	15	1634	10	1761	6	1798	23	1634	10	1288.5	20	1454.37	9.82885	1361.87	25.52	1237	12	1288.5	20	1148	46	1048	6	1131	18	1178.37	29.8593	884.29	17.635	1321	17	1229	64	1197	22	1148	46	1123.8	64.3
1147	21	1283	17	1386.67	97.7739	1252	16	1230.18	35.9512	1147	21	1649	3.5	1689	3.5	1794	14.5	1649	3.5	1296.9	25.3	1457.68	142.283	1409.59	45.9901	1239	18	1296.9	25.3	1149	16	1059	35	1144	23	1184.32	31.7237	1031.06	31.14	1662	9	1237	13	1235	17	1149	16	1162.5	96.4
1135	34	1275	22.5	1398.14	83.936	1252	16	1233.9	46.3044	1135	34	1658	5	2441	5	1846	11.5	1658	5	1302.1	40.6	1466	24.9386	1411.99	26.2304	1245	13	1302.1	40.6	1188	22	1072	7	1169	23	1184.46	23.1835	1197.24	30.395	1668	20	1246	150	1251	72	1188	22	1181.3	57.1
1238	26.5	1156	19	1401.63	32.4084	1253	18	1239.02	23.9816	1238	26.5	1683	5.5	1893	5.5	1869	14	1683	5.5	1304.6	36.8	1467.71	8.9287	1482.19	61.9383	1249	13	1304.6	36.8	1190	50	1090	6	1230	12	1185.23	44.2925	1228.27	30.405	1669	24	1260	14	1283	37	1190	50	1181.5	20.8
1065	14	1177	19	1404.27	94.8276	1254	9	1239.96	28.4237	1065	14	1689	5.5	1817	5	1818	16	1689	5.5	1315.4	15.7	1469.1	33.6869	1487.22	59.399	1252	10	1315.4	15.7	1194	23	1104	9	1238	84	1185.59	46.5574	1341.19	32.11	1675	8	1315	120	1284	29	1194	23	1183.2	30.4
1543	46.5	1171	30	1439.47	22.5998	1254	8	1245.32	19.661	1543	46.5	1692	4	1789	5.5	1814	11	1692	4	1319.5	14.7	1478.79	29.1721	1592.7	43.9728	1253	14	1319.5	14.7	1197	42	1110	26	1247	25	1186.41	45.1551	1282.25	30.04	1680	9	1386	15	1290	39	1197	42	1189.3	35.3
1187	24	1414	25	1469.33	32.2952	1255	13	1245.74	19.6409	1187	24	1696	4.5	2594	6	1758	14.5	1696	4.5	1319.8	14	1483.28	116.806	1623.35	15.2538	1257	8	1319.8	14	1216	78	1155	21	1248	68	1191.01	44.7323	1352.02	29.79	1680	40	1406	11	1420	38	1216	78	1193	51.4
1378	13	1318	17.5	1471.66	39.7415	1255	16	1245.77	69.4917	1378	13	1697	5.5	2585	7.5	2546	12.5	1697	5.5	1322.2	16.4	1484.25	24.0217	1653.17	31.231	1258	8	1322.2	16.4	1221	17	1155	32	1261	14	1191.05	38.0377	1407.25	29.83	1702	16	1414	32	1425	65	1221	17	1193.2	66.2
1220	37	1458	24.5	1471.74	115.11	1256	14	1246.19	22.9694	1220	37	1699	5.5	1763	4.5	2577	13	1699	5.5	1323.4	18.9	1488.6	25.3065	1657.64	22.01	1258	6	1323.4	18.9	1221	165	1170	24	1273	8	1193.09	58.6109	1529.37	33.77	1724	37	1428	21	1430	19	1221	165	1196.9	40.6
1333	35	1180	21	1507.99	25.9676	1258	10	1246.49	25.6901	1333	35	1703	6.5	2744	7	2673	16.5	1703	6.5	1324.3	19.9	1518.64	16.0484	1657.85	29.4479	1264	6	1324.3	19.9	1229	13	1177	28	1275	8	1193.25	27.9155	1400.83	29.505	1733	9	1430	19	1440	16	1229	13	1201.4	26.7
1234	24	1375	22	1522.6	42.3613	1270	11	1247.12	42.6366	1234	24	1704	5	1794	5.5	1792	18.5	1704	5	1326.9	10.6	1611.68	33.4865	1663.06	33.1451	1320	5	1326.9	10.6	1236	9	1178	15	1280	14	1193.39	11.9643	1416.58	29.54	1756	12	1435	23	1443	24	1236	9	1202.8	17.4
1270	18.5	1175	23.5	1539.2	52.3133	1275	27	1247.91	86.1456	1270	18.5	1706	5	2601	6	2473	14.5	1706	5	1327.4	24.7	1616.25	38.2422	1680.87	23.0561	1325	5	1327.4	24.7	1251	25	1180	13	1280	33	1204.01	29.9472	1508.18	31.82	1758	15	1444	16	1446	54	1251	25	1204.1	24.1
1162	43	1167	16.5	1577.54	25.3149			1248.78	49.5332	1162	43	1706	4.5	1779	4.5	1799	13.5	1706	4.5	1328.3	38.6	1632.62	107.35	1686.07	36.4041	1405	10	1328.3	38.6	1251	23	1186	8	1281	27	1205.47	25.7113	1569.81	28.97	1758	16	1444	47	1447	38	1251	23	1205.5	9.3
1183	22.5	1493	27.5	1605.35	113.382			1249.89	48.0747	1183	22.5	1711	7	1777	5	2762	8	1711	7	1329.1	20.3	1635.33	14.5431	1703.27	40.8223	1432	7	1329.1	20.3	1257	20	1189	36	1285	21	1207.81	29.33	1593.07	29.06	1760	13	1448	12	1449	16	1257	20	1209.2	27.4
1246	23	1177	16	1622.21	45.8855			1250.44	24.9427	1246	23	1711	6	2033	4.5	1780	9	1711	6	1329.6	13.9	1637.94	41.9585	1718.25	38.294	1440	5	1329.6	13.9	1264	17	1202	14	1286	28	1211.14	26.7808	1574.8	28.765	1761	14	1450	5	1460	27	1264	17	1215.8	39.8
1477	21.5	1155	21	1653.7	42.2421			1253.8	68.1733	1477	21.5	1712	6	1872	3	1885	13.5	1712	6	1330.9	16.2	1638.46	19.9722	1721.11	29.9424	1445	8	1330.9	16.2	1267	8	1216	69	1304	10	1213.43	22.2458	1637.36	31.605	1762	8	1451	47	1679	22	1267	8	1219.4	26
1355	16.5	1407	18.5	1742.47	30.134			1254.39	23.6979	1355	16.5	1712	3.5	1774	5	1888	17.5	1712	3.5	1333.4	16.8	1647.86	14.7661	1741.3	49.6089	1700	5	1333.4	16.8	1267	29	1261	28	1311	19	1214.17	26.2341	1641.27	28.83	1776	10	1454	14	1683	19	1267	29	1222.8	5.9
1668	34	1669	21.5	1745.78	57.049			1258.78	25.7031	1668	34	1713	4	1781	2.5	1817	10.5	1713	4	1337.4	23.2	1649.88	28.9596	1746.22	53.8073	1711	4	1337.4	23.2	1276	30	1272	4	1312	73	1214.66	10.1937	1653.09	28.49	1791	14	1457	11	1696	29	1276	30	1225.8	49.4
1114	17.5	1209	46	1746.39	44.9248			1265.81	35.9907	1114	17.5	1713	5.5	1715	5	1844	8.5	1713	5.5	1339.5	17.2	1676.89	16.8453	1806.94	5.32706	1778	5	1339.5	17.2	1276	14	1291	15	1317	64	1219.01	67.6844	1717.32	28.45	1791	19	1464	18	1708	33	1276	14	1225.9	21.9
1246	35	1398	18	1766.47	27.0972			1266.07	51.6584	1246	35	1714	3.5	1746	6.5	1793	16.5	1714	3.5	1341.1	18.5	1684.77	38.7885					1341.1	18.5	1280	19	1295	12	1320	16	1219.97	24.6677	1782.16	30.265	1793	6	1477	37	1710	28	1280	19	1229.1	49.9
1200	21.5	1351	28	2414.27	6.6003			1267.07	20.0285	1200	21.5	1714	4.5	1717	4.5	1862	15.5	1714	4.5	1341.8	13.9	1686.06	37.3146					1341.8	13.9	1280	22	1295	84	1322	10	1227.19	66.2092	1664.6	28.45	1794	22	1504	16	1715	10	1280	22	1230.2	12.3
1257	38.5	1516	19					1267.32	34.2078	1257	38.5	1716	6.5	1721	4	1735	19.5	1716	6.5	1342.3	17.6	1686.17	14.7418					1342.3	17.6	1280	33	1298	8	1322	33	1227.62	49.5472	1744.8	28.37	1801	11	1625	17	1725	10	1280	33	1230.6	64
1457	19	1196	17.5					1269.01	52.4007	1457	19	1718	5.5	1786	5	2476	19.5	1718	5.5	1344.5	19.5	1687.75	61.3486					1344.5	19.5	1291	25	1355	20	1323	14	1227.83	27.8771	1711.95	30.915	1804	16	1632	91	1729	24	1291	25	1232.5	41.5
1284	22	1627	16.5					1269.28	50.0747	1284	22	1719	4	1859	3.5	1768	17	1719	4	1346.2	18.5	1688.17	37.1733					1346.2	18.5	1306	39	1405	10	1374	17	1229.66	26.8089	1738.99	28.275	1820	13	1648	10	1735	20	1306	39	1232.6	104.8
1244	36.5	1189	23.5					1273.2	26.8509	1244	36.5	1719	7.5	1769	5.5	1813	23	1719	7.5	1349.3	14	1698.01	103.656					1349.3	14	1310	28	1418	34	1395	19	1230.57	29.4066	1810.29	28.23	1822	8	1653	15	1736	8	1310	28	1232.6	23.8
1174	18.5	1132	27					1273.72	51.2507	1174	18.5	1721	5	1692	3	2601	12	1721	5	1352.7	11.1	1708.88	26.8619					1352.7	11.1	1314	29	1429	27	1405	10	1233.66	34.8709	1750.84	28.255	1822	6	1667	31	1743	33	1314	29	1234.2	29.4
1264	21	1107	11					1273.93	30.5568	1264	21	1723	4	2669	7	1873	12	1723	4	1355.3	17.1	1709.93	9.64776					1355.3	17.1	1356	12	1429	16	1413	30	1233.94	12.7973	1686.89	28.335	1829	11	1674	9	1746	27	1356	12	1238.8	21.6
1478	15	1073	39					1274.32	80.8843	1478	15	1725	4.5	1726	5	1800	20.5	1725	4.5	1360.8	19.7	1713.76	10.0982					1360.8	19.7	1411	12	1437	21	1414	22	1236.72	20.5794	1823.2	28.54	1838	7	1679	16	1746	22	1411	12	1242.3	24.2
1418	17.5	1205	20					1277.75	30.0033	1418	17.5	1726	4.5	1760	3	1783	15.5	1726	4.5	1361.2	13.2	1728.44	32.3101					1361.2	13.2	1416	67	1440	28	1416	12	1238.33	34.8575	1773.08	28.135	1840	41	1686	18	1748	46	1416	67	1243.2	45.1
1156	29.5	1055	43					1277.87	33.4353	1156	29.5	1727	7	1743	5.5	1778	15	1727	7	1361.7	14	1740.63	34.8751					1361.7	14	1416	16	1443	19	1417	31	1240.53	24.1999	1757.62	28.105	1850	14	1709	7	1753	7	1416	16	1247.2	12.3
1250	23.5	1444	22					1278.04	19.6035	1250	23.5	1728	10	1786	2.5	1776	10	1728	10	1362.6	21.4	1752.79	13.6535					1362.6	21.4	1421	21	1445	4	1417	13	1241.78	51.6731	1762.93	28.195	1856	15	1709	7	1757	20	1421	21	1248.3	20.7
1239	16	1149	16					1278.51	97.7001	1239	16	1728	7.5	1758	4.5	2636	18.5	1728	7.5	1363.2	15.5	1768.86	24.1844					1363.2	15.5	1421	44	1446	13	1420	30	1253.67	14.5588	1841.39	28.14	1886	6	1711	8	1758	31	1421	44	1253.1	13.6
1676	30	1236	36.5					1280.84	30.986	1676	30	1729	5	1785	4	1959	12	1729	5	1363.9	20.7	1817.11	113.404					1363.9	20.7	1424	22	1447	18	1421	14	1262.94	23.0999	1825.38	27.88	1894	8	1720	13	1761	43	1424	22	1254.2	167
1294	28.5	1244	25					1281.21	57.932	1294	28.5	1729	5	1697	4	2463	11.5	1729	5	1365.3	23.7	1831	36.1567					1365.3	23.7	1425	8	1450	14	1422	26	1265.5	21.9019	1769.87	28.09	1894	10	1724	17	1774	8	1425	8	1265.4	16.8
1546	31.5	1508	22					1281.55	46.8288	1546	31.5	1729	6	1802	6	1851	13.5	1729	6	1369.3	21.6	2448.57	13.0701					1369.3	21.6	1426	16	1468	19	1428	19	1266	74.4706	1821.82	28	1895	10	1732	26	1777	10	1426	16	1286.8	73.7
1269	22.5	1456	18.5					1281.84	37.3079	1269	22.5	1730	4	1743	4.5	1726	16	1730	4	1370.4	15.5	2478.19	4.62897					1370.4	15.5	1430	9	1636	17	1429	31	1267.21	76.6911	1845.11	29.94	1898	9	1737	10	1789	19	1430	9	1305.1	8.5
1237	22.5	1222	17					1282.93	79.6889	1237	22.5	1731	4	1728	4.5	1802	11.5	1731	4	1375	14.6	2517.62	14.8798					1375	14.6	1430	23	1652	12	1430	12	1269.22	49.8442	1797.21	27.995	1901	7	1741	6	1794	35	1430	23	1320.1	40.1
1364	20	1252	13.5					1283.12	56.1331	1364	20	1731	7	1868	5.5	1901	13	1731	7	1375.1	13.7							1375.1	13.7	1433	24	1661	29	1435	30	1273.65	123.399	1854.48	28.075	1908	6	1753	11	1797	32	1433	24	1322.5	42.5
1505	31.5	1450	20.5					1284.88	73.7557	1505	31.5	1731	5	2595	5	2688	17.5	1731	5	1376.8	11.8							1376.8	11.8	1434	54	1665	20	1438	18	1275.2	68.3901	1806.6	27.93	1908	8	1755	8	1808	8	1434	54	1324.9	13.1
1430	22	1206	29.5					1285.3	46.5523	1430	22	1733	6	1784	4.5	1867	19.5	1733	6	1378	13.7							1378	13.7	1435	10	1668	28	1438	9	1291	68.7546	1901.84	27.725	1915	7	1759	24	1812	12	1435	10	1327.5	143.2
1532	17	1181	14					1285.36	97.5939	1532	17	1734	5.5	1761	5.5	1769	12.5	1734	5.5	1378.8	22.4							1378.8	22.4	1439	42	1670	11	1439	54	1307.98	24.7865	2033.06	27.27	1920	11	1770	10	1818	8	1439	42	1331.1	21.1
1266	29	1282	35.5					1285.8	48.6875	1266	29	1735	6	1858	4	1699	21	1735	6	1380.6	19.7							1380.6	19.7	1439	10	1688	22	1441	25	1309.12	168.609	2719.26	25.915	1922	16	1776	7	1820	10	1439	10	1356.4	19
1485	17	1149	37					1285.9	94.5656	1485	17	1736	5.5	1734	3	1787	13	1736	5.5	1381.5	23.2							1381.5	23.2	1441	15	1697	18	1446	15	1321.93	30.6257	3055.74	24.715	1928	6	1777	18	1833	20	1441	15	1359.8	40.6
1209	33	1222	18.5					1286.19	67.448	1209	33	1737	7	1775	3.5	1770	14	1737	7	1384.6	15.8							1384.6	15.8	1445	17	1704	9	1448	9	1329.79	18.7329	3036.97	24.71	1933	7	1783	7	1834	10	1445	17	1368.9	52.9
1200	41	1507	19					1287.66	30.3974	1200	41	1737	6.5	1773	5	2681	6	1737	6.5	1386.6	16.8							1386.6	16.8	1445	12	1705	8	1452	16	1352.32	140.055	3308.13	24.11	1934	5	1801	9	1843	24	1445	12	1383.6	48.7
1458	15	1094	22					1289.23	41.8414	1458	15	1738	4	1785	4	1786	15	1738	4	1386.8	20.5							1386.8	20.5	1447	6	1714	2	1458	10	1434.24	67.6121	3269.08	24.165	1937	14	1801	13	1852	5	1447	6	1384.5	13.2
1522	26.5	1205	31.5					1291.83	46.6316	1522	26.5	1740	7	1722	3.5	1766	10	1740	7	1387.4	20.6							1387.4	20.6	1448	24	1717	2	1461	55	1435.19	11.643			1938	7	1815	9	1871	7	1448	24	1390.4	34.2
1321	30	1385	19.5					1293.27	30.0446	1321	30	1741	6.5	2458	5.5	1833	21.5	1741	6.5	1387.5	12.4							1387.5	12.4	1455	16	1717	4	1464	25	1437.78	24.8099			1942	17	1818	14	1871	9	1455	16	1403.3	13.8
1507	36	1231	17.5					1294.78	46.5059	1507	36	1745	4.5	1754	2.5	1860	16	1745	4.5	1387.6	16.2							1387.6	16.2	1456	55	1720	10	1476	79	1443.25	19.0174			1943	11	1821	6	1873	18	1456	55	1419.3	23
1266	34	1385	21					1299.28	73.4775	1266	34	1748	9	1914	3.5	1770	12.5	1748	9	1391	22.9							1391	22.9	1456	11	1727	11	1486	26	1444.23	21.2511			1950	8	1822	8	1896	12	1456	11	1419.7	67.9
1600	21	1453	17.5					1302.49	28.2446	1600	21	1748	6.5	1757	6	1778	21	1748	6.5	1391.4	20							1391.4	20	1470	17	1731	8	1503	25	1444.75	11.566			1952	5	1826	8	2500	6	1470	17	1422.2	6.5
1805	26.5	1443	19					1304.78	59.1752	1805	26.5	1748	6.5	1772	5	2695	13	1748	6.5	1392.8	12.5							1392.8	12.5	1630	12	1732	18	1510	12	1451.17	13.5119			1959	18	1839	8	2527	3	1630	12	1428.5	37.2
1487	20	1298	30					1307.81	40.3304	1487	20	1751	4	3367	5	2458	14.5	1751	4	1398.5	20.3							1398.5	20.3	1639	24	1733	21	1630	36	1452.8	25.5499			1964	5	1849	27	2670	4	1639	24	1430.3	7.9
1423	16	1461	17.5					1310.12	47.898	1423	16	1760	12.5	1836	3.5	2565	17.5	1760	12.5	1402.4	19.5							1402.4	19.5	1641	117	1746	11	1665	8	1455.64	23.1826			1965	3	1865	15	2673	4	1641	117	1436.2	14.7
1234	31	1260	40.5					1315.51	30.5581	1234	31	1760	7	2746	5.5	2871	12.5	1760	7	1409.8	14.5							1409.8	14.5	1656	78	1746	4	1713	12	1456.21	50.7007			1970	4	1871	11	2674	5	1656	78	1439	13.5
1637	21	1173	26.5					1319.63	100.424	1637	21	1762	8.5	1777	4.5	1922	15.5	1762	8.5	1410.9	14.2							1410.9	14.2	1656	7	1746	6	1720	6	1458.38	44.7033			1970	8	1887	13	2680	3	1656	7	1439.6	51
1448	19	1135	17					1326.98	47.4337	1448	19	1762	6.5	1725	4.5	1845	11	1762	6.5	1411.6	10							1411.6	10	1659	15	1751	17	1727	4	1459.15	39.9803			1989	7	1891	18	2684	6	1659	15	1445.3	25.4
1471	23.5	1236	25					1328.22	61.141	1471	23.5	1763	4.5	2565	8.5	2475	18	1763	4.5	1412.6	11.5							1412.6	11.5	1678	10	1759	5	1735	11	1460.7	25.4455			2009	8	1959	10	2691	4	1678	10	1445.5	26.8
1255	27.5	1600	35					1328.27	55.0314	1255	27.5	1770	6.5	1698	5	1786	18	1770	6.5	1412.9	22.1							1412.9	22.1	1680	13	1767	10	1738	4	1461.17	18.4091			2019	4	2481	5	2692	3	1680	13	1447.7	32.5
1119	32	1186	16					1328.44	79.2101	1119	32	1780	6.5	1799	5	2481	12	1780	6.5	1413.5	11.1							1413.5	11.1	1682	5	1773	4	1744	40	1461.49	23.8063			2083	8	2518	6	2699	4	1682	5	1448	20.3
1276	35	1193	27					1334.61	19.4	1276	35	1781	7.5	1864	6	1773	17	1781	7.5	1419.9	15.4							1419.9	15.4	1685	26	1775	9	1748	7	1466.64	29.1253			2083	7	2590	2	2700	4	1685	26	1448.1	33.3
1283	23.5	1356	16.5					1334.88	56.8026	1283	23.5	1784	5.5	1741	6	1850	32.5	1784	5.5	1420.8	10.5							1420.8	10.5	1690	16	1778	9	1752	19	1467.52	13.7155			2213	5	2638	7	2701	2	1690	16	1453.8	20.3
1255	19	1089	18					1347.31	50.3217	1255	19	1784	7	1770	6.5	1771	12	1784	7	1421.2	14.4							1421.2	14.4	1696	5	1783	7	1753	14	1468.74	27.0302			2540	7	2671	5	2707	6	1696	5	1457.6	15
1260	22.5	1162	23					1362.35	107.626	1260	22.5	1786	6	1787	5	3220	13.5	1786	6	1421.8	12.9							1421.8	12.9	1697	10	1810	11	1756	13	1469.09	27.1914			2543	3	2683	3	2713	3	1697	10	1459.9	12.3
1299	23.5	1210	22.5					1373.08	25.379	1299	23.5	1786	6	1780	6.5	1833	11	1786	6	1422.3	16.9							1422.3	16.9	1708	10	1819	4	1764	14	1470.11	22.8135			2556	2	2690	5	2714	4	1708	10	1461	11
1279	33.5	1188	30.5					1378.17	29.4918	1279	33.5	1801	8	1764	4	1771	11	1801	8	1423	17.1							1423	17.1	1719	20	1822	11	1765	12	1476.32	37.0287			2557	10	2696	4	2715	3	1719	20	1464.6	35.8
1479	14.5	1116	21					1385.54	131.883	1479	14.5	1803	8.5	2714	6.5	1783	12.5	1803	8.5	1423.4	12.6							1423.4	12.6	1729	9	1860	7	1765	15	1476.34	115.742			2580	6	2703	5	2717	4	1729	9	1465.4	21.7
1272	32	1071	36					1416.72	89.0401	1272	32	1806	7.5	1776	3.5	1720	12	1806	7.5	1423.8	10.5							1423.8	10.5	1748	19	1964	15	1769	18	1478.49	17.9852			2583	3	2706	3	2717	3	1748	19	1465.8	9.4
1155	28	1191	40					1434.62	39.349	1155	28	1814	9	1762	4	2695	16	1814	9	1425.9	36.8							1425.9	36.8	1759	21	2055	15	1775	12	1482.39	18.1242			2616	5	2722	4	2720	7	1759	21	1467.3	18.7
1252	16	1202	31					1443.15	30.1284	1252	16	1842	5.5	1750	4	1760	12.5	1842	5.5	1430.4	14.1							1430.4	14.1	1767	24	2543	25	1777	10	1482.66	14.0478			2617	3	2735	3	2726	5	1767	24	1471	25.8
1553	42	1202	28					1449.12	60.8414	1553	42	1859	5.5	1757	3	1863	20	1859	5.5	1433.1	13.9							1433.1	13.9	1769	61	2558	14	1778	15	1487.93	23.6083			2644	2	2749	10	2728	9	1769	61	1474.3	24.6
1772	22.5	1236	17.5					1457.16	34.2523	1772	22.5	1865	6.5	2069	5.5	2692	8	1865	6.5	1434	13.6							1434	13.6	1777	27	3160	2	1780	10	1489.15	31.9832			2770	7	2783	14	2732	5	1777	27	1474.9	16.9
1309	31.5	1274	19.5					1459.29	19.0638	1309	31.5	1874	9	1750	3	1809	15	1874	9	1434.7	12.7							1434.7	12.7	1812	10			1780	9	1489.46	17.0974			2792	4			2736	6	1812	10	1475.6	11.9
1451	16	1460	22					1461.1	19.8491	1451	16	1875	9.5	1782	6	1752	36	1875	9.5	1435.5	12.5							1435.5	12.5	1814	48			1785	57	1492.02	18.1868			2868	3			2738	3	1814	48	1476.2	14.3
1244	26	1511	21.5					1471.79	26.0161	1244	26	1916	7	1859	5	1796	16	1916	7	1436.6	12.1							1436.6	12.1	1833	17			1792	16	1493.58	35.7726			2875	2			2746	11	1833	17	1478.1	97
1490	20.5	1188	28					1476.38	67.3553	1490	20.5	1949	9.5	1852	4	1784	18	1949	9.5	1439.7	12.9							1439.7	12.9	1838	6			1792	7	1494.37	34.0946			2887	2			2757	4	1838	6	1478.3	174
1496	22	1259	37.5					1477.68	32.092	1496	22	1971	3.5	1761	5	1846	17	1971	3.5	1440.2	16							1440.2	16	1841	17			1799	10	1494.71	18.9884			2898	2			2765	3	1841	17	1484.4	34
1258	21.5	1190	24.5					1478.6	46.474	1258	21.5	1998	4.5	1726	5	1776	11.5	1998	4.5	1440.2	11.6							1440.2	11.6	1844	23			1816	22	1503.08	42.375			2911	3			2802	4	1844	23	1492	16.3
1284	21.5	1309	23.5					1480.74	42.8353	1284	21.5	2140	10.5	2696	8.5	1903	13.5	2140	10.5	1441.4	11.4							1441.4	11.4	1867	15			1828	15	1504.61	81.1816			3101	8			2862	5	1867	15	1495.6	17.7
1498	18	1276	19					1484.39	28.8414	1498	18	2376	7.5	1783	3	3088	10	2376	7.5	1442.2	11.5							1442.2	11.5	1890	13			1828	6	1507.56	33.3282							2892	3	1890	13	1498.1	42.6
1196	12	1265	23					1485.23	29.5792	1196	12	2465	5.5	1798	4.5	1777	23	2465	5.5	1443.8	11							1443.8	11	1899	30			1837	4	1590.7	13.7889							3025	4	1899	30	1544.3	10.6
1512	20.5	1744	35.5					1485.57	241.79	1512	20.5	2466	5	1792	4	2682	15.5	2466	5	1444.1	14.6							1444.1	14.6	1901	31			1888	6	1603.87	17.0475							3209	2	1901	31	1610	23.6
1289	20.5	1744	35					1486.59	28.2424	1289	20.5	2479	8.5	1773	4	2698	15.5	2479	8.5	1444.5	14.2							1444.5	14.2	1908	5			1918	18	1613.21	9.72819									1908	5	1618.9	21.9
1206	19	1226	25.5					1491.59	41.7385	1206	19	2583	9	2692	6.5	2904	15.5	2583	9	1446	16.1							1446	16.1	1911	9			1923	6	1634.01	54.3559									1911	9	1636.7	7.8
1491	19.5	1431	23					1497.62	31.0776	1491	19.5	2658	6	1703	4	2978	13.5	2658	6	1448	15							1448	15	1912	16			2525	2	1667.82	21.2567									1912	16	1639.1	22.3
1237	23.5							1500.22	29.5151	1237	23.5	2661	7.5	2673	2	1761	15	2661	7.5	1450.2	11.2							1450.2	11.2	1913	8			2563	2	1697.99	28.9358									1913	8	1640	4.9
1463	23							1502.13	42.9194	1463	23	2695	9.5	1785	5	1792	10.5	2695	9.5	1450.4	10.2							1450.4	10.2	1919	5					1755.59	36.1519									1919	5	1650	13.9
1184	31.5							1517.29	44.963	1184	31.5	2695	6.5	1834	4.5	1842	11.5	2695	6.5	1452.4	11.9							1452.4	11.9	1922	11					1805.34	14.5915									1922	11	1653.4	6.2
1195	28.5							1522.38	42.0382	1195	28.5	2704	8	1844	3.5	2427	25.5	2704	8	1453.9	16.3							1453.9	16.3	1929	5					1807.13	12.5407									1929	5	1653.5	22.4
1265	21							1563.1	29.2443	1265	21	2732	7	1724	4.5	1836	12.5	2732	7	1455.1	13.4							1455.1	13.4	1931	3					1846.79	24.443									1931	3	1678.3	4.9
1284	21							1568.42	34.3046	1284	21	2805	7	1748	4.5	2473	9.5	2805	7	1457.7	33.6							1457.7	33.6	1959	10					1862.48	18.3607									1959	10	1685.5	6.7
1325	21.5							1581.05	91.5654	1325	21.5	2906	11.5	1750	4	1784	22.5	2906	11.5	1467.8	18.8							1467.8	18.8	2568	3					1885.6	6.37286									2568	3	1704.3	5.6
1504	20.5							1665.43	26.1203	1504	20.5	2955	9	1739	6	3688	11.5	2955	9	1468.9	13.9							1468.9	13.9	2690	4					1889.64	13.6345									2690	4	1717.8	44
								1677.32	51.209	980	24.5	3215	9.5	1758	3.5	2677	17	3215	9.5	1483.8	16.3							1483.8	16.3							1890.15	10.3878									1031	20	1719.3	15.8
								1734.73	31.0086	1348	17	3244	8	2568	5	2863	18.5	3244	8	1532.8	16.6							1532.8	16.6							1896.88	10.4602									1048	6	1727.7	7.9
								1753.47	18.3394	1283	17			1820	4	2438	15	2438	3.5	1549.4	11.9							1549.4	11.9							2562.27	5.36118									1059	35	1738.1	10.4
								1791.9	33.3341	1275	22.5					2686	21	1761	6	1579.5	21.4							1579.5	21.4																	1072	7	1744	16.2
										1156	19					1917	16	1689	3.5	1620	13.9							1620	13.9																	1090	6	1747.7	7.3
										1177	19					2705	29	2441	5	1624.5	11.9							1624.5	11.9																	1104	9	1763.6	9
										1171	30					1796	14.5	1893	5.5	1627.4	13.7							1627.4	13.7																	1110	26	1766	10.6
										1414	25					1758	18	1817	5	1628.2	13.9							1628.2	13.9																	1155	21	1772.6	8.1
										1318	17.5					1844	7.5	1789	5.5	1629.7	15							1629.7	15																	1155	32	1773.9	5.3
										1458	24.5					1792	22	2594	6	1630.5	17.3							1630.5	17.3																	1170	24	1776.6	7.9
										1180	21					1802	18.5	2585	7.5	1630.8	18.2							1630.8	18.2																	1177	28	1779.9	9.6
										1375	22					1810	17	1763	4.5	1631.1	15.7							1631.1	15.7																	1178	15	1780.5	16.1
										1175	23.5					1785	20.5	2744	7	1631.2	12.2							1631.2	12.2																	1180	13	1781.3	14.1
										1167	16.5					1779	19	1794	5.5	1631.6	14.6							1631.6	14.6																	1186	8	1781.9	17.8
										1493	27.5					1751	13.5	2601	6	1632.9	12.8							1632.9	12.8																	1189	36	1782.9	12.6
										1177	16					1859	13.5	1779	4.5	1632.9	10.5							1632.9	10.5																	1202	14	1784.2	5.9
										1155	21					1770	18	1777	5	1635.7	11.9							1635.7	11.9																	1216	69	1785.1	10
										1407	18.5					1805	15	2033	4.5	1636.5	15.3							1636.5	15.3																	1261	28	1785.4	20.7
										1669	21.5					1785	16.5	1872	3	1636.7	10.2							1636.7	10.2																	1272	4	1796.5	13.3
										1209	46							1774	5	1637.2	9.9							1637.2	9.9																	1291	15	1796.8	6.1
										1398	18							1781	2.5	1637.5	12.1							1637.5	12.1																	1295	12	1798	21.9
										1351	28							1715	5	1637.6	13.4							1637.6	13.4																	1295	84	1802.9	8.3
										1516	19							1746	6.5	1638.6	15							1638.6	15																	1298	8	1803.7	8.5
										1196	17.5							1717	4.5	1639	13.3							1639	13.3																	1355	20	1812.8	6.5
										1627	16.5							1721	4	1639.6	13.6							1639.6	13.6																	1405	10	1816.5	2.8
										1189	23.5							1786	5	1639.9	12.9							1639.9	12.9																	1418	34	1857	5.5
										1132	27							1859	3.5	1640.3	10.7							1640.3	10.7																	1429	27	1873.6	3.4
										1107	11							1769	5.5	1640.4	12.6							1640.4	12.6																	1429	16	1876.4	5.9
										1073	39							1692	3	1640.4	12							1640.4	12																	1437	21	1879.9	9.6
										1205	20							2669	7	1641.1	12.7							1641.1	12.7																	1440	28	2055.7	4.2
										1055	43							1726	5	1641.5	11.8							1641.5	11.8																	1443	19	2273.5	14.7
										1444	22							1760	3	1641.7	15							1641.7	15																	1445	4	2612.4	72.7
										1149	16							1743	5.5	1642	11.3							1642	11.3																	1446	13	2627	2.3
										1236	36.5							1786	2.5	1642.2	9.4							1642.2	9.4																	1447	18	3062.2	17.9
										1244	25							1758	4.5	1642.7	15.2							1642.7	15.2																	1450	14
										1508	22							1785	4	1642.8	14.5							1642.8	14.5																	1468	19
										1456	18.5							1697	4	1643.2	12.7							1643.2	12.7																	1636	17
										1222	17							1802	6	1643.9	15							1643.9	15																	1652	12
										1252	13.5							1743	4.5	1644.2	10.8							1644.2	10.8																	1661	29
										1450	20.5							1728	4.5	1644.6	16.3							1644.6	16.3																	1665	20
										1206	29.5							1868	5.5	1645	13.7							1645	13.7																	1668	28
										1181	14							2595	5	1645.1	13							1645.1	13																	1670	11
										1282	35.5							1784	4.5	1645.4	16							1645.4	16																	1688	22
										1149	37							1761	5.5	1645.9	9.9							1645.9	9.9																	1697	18
										1222	18.5							1858	4	1646.6	17.3							1646.6	17.3																	1704	9
										1507	19							1734	3	1646.8	16.6							1646.8	16.6																	1705	8
										1094	22							1775	3.5	1646.8	10							1646.8	10																	1714	2
										1205	31.5							1773	5	1648.1	12.8							1648.1	12.8																	1717	2
										1385	19.5							1785	4	1648.2	14.7							1648.2	14.7																	1717	4
										1231	17.5							1722	3.5	1648.9	14.8							1648.9	14.8																	1720	10
										1385	21							2458	5.5	1650.2	12.7							1650.2	12.7																	1727	11
										1453	17.5							1754	2.5	1650.2	12.3							1650.2	12.3																	1731	8
										1443	19							1914	3.5	1650.3	11.4							1650.3	11.4																	1732	18
										1298	30							1757	6	1650.5	13.1							1650.5	13.1																	1733	21
										1461	17.5							1772	5	1650.6	9.9							1650.6	9.9																	1746	11
										1260	40.5							3367	5	1651.5	11.3							1651.5	11.3																	1746	4
										1173	26.5							1836	3.5	1651.6	11							1651.6	11																	1746	6
										1135	17							2746	5.5	1653.2	15.8							1653.2	15.8																	1751	17
										1236	25							1777	4.5	1655.4	10.9							1655.4	10.9																	1759	5
										1600	35							1725	4.5	1655.6	11.6							1655.6	11.6																	1767	10
										1186	16							2565	8.5	1655.6	12							1655.6	12																	1773	4
										1193	27							1698	5	1655.8	11.4							1655.8	11.4																	1775	9
										1356	16.5							1799	5	1656.1	11.6							1656.1	11.6																	1778	9
										1089	18							1864	6	1656.9	11.8							1656.9	11.8																	1783	7
										1162	23							1741	6	1657.9	12.1							1657.9	12.1																	1810	11
										1210	22.5							1770	6.5	1659.2	12.7							1659.2	12.7																	1819	4
										1188	30.5							1787	5	1659.7	13.3							1659.7	13.3																	1822	11
										1116	21							1780	6.5	1659.8	11.8							1659.8	11.8																	1860	7
										1071	36							1764	4	1660	13.2							1660	13.2																	1964	15
										1191	40							2714	6.5	1660.8	14.6							1660.8	14.6																	2055	15
										1202	31							1776	3.5	1662.1	11.2							1662.1	11.2																	2543	25
										1202	28							1762	4	1663.8	12.9							1663.8	12.9																	2558	14
										1236	17.5							1750	4	1665.3	11.6							1665.3	11.6																	3160	2
										1274	19.5							1757	3	1665.6	13							1665.6	13																	1117	117
										1460	22							2069	5.5	1666.1	16.2							1666.1	16.2																	1131	18
										1511	21.5							1750	3	1666.3	11							1666.3	11																	1144	23
										1188	28							1782	6	1666.7	17.8							1666.7	17.8																	1169	23
										1259	37.5							1859	5	1667	12							1667	12																	1230	12
										1190	24.5							1852	4	1667.6	18.9							1667.6	18.9																	1238	84
										1309	23.5							1761	5	1667.8	14.4							1667.8	14.4																	1247	25
										1276	19							1726	5	1668.9	11.4							1668.9	11.4																	1248	68
										1265	23							2696	8.5	1669.2	12.6							1669.2	12.6																	1261	14
										1744	35.5							1783	3	1669.2	12							1669.2	12																	1273	8
										1744	35							1798	4.5	1670	13							1670	13																	1275	8
										1226	25.5							1792	4	1670.2	12.3							1670.2	12.3																	1280	14
										1431	23							1773	4	1670.8	15.3							1670.8	15.3																	1280	33
										1339.45	18.6084							2692	6.5	1670.8	11.5							1670.8	11.5																	1281	27
										1371.37	81.9667							1703	4	1671.2	10							1671.2	10																	1285	21
										1386.67	97.7739							2673	2	1671.6	10.7							1671.6	10.7																	1286	28
										1398.14	83.936							1785	5	1672.2	14.9							1672.2	14.9																	1304	10
										1401.63	32.4084							1834	4.5	1673	14.3							1673	14.3																	1311	19
										1404.27	94.8276							1844	3.5	1673	11.5							1673	11.5																	1312	73
										1439.47	22.5998							1724	4.5	1673.2	11							1673.2	11																	1317	64
										1469.33	32.2952							1748	4.5	1673.4	12							1673.4	12																	1320	16
										1471.66	39.7415							1750	4	1673.7	9.8							1673.7	9.8																	1322	10
										1471.74	115.11							1739	6	1674	13.1							1674	13.1																	1322	33
										1507.99	25.9676							1758	3.5	1675.3	9							1675.3	9																	1323	14
										1522.6	42.3613							2568	5	1676.1	12.2							1676.1	12.2																	1374	17
										1539.2	52.3133							1820	4	1676.2	12.9							1676.2	12.9																	1395	19
										1577.54	25.3149							1825	15	1676.8	19.7							1676.8	19.7																	1405	10
										1605.35	113.382							1798	23	1677.3	14.4							1677.3	14.4																	1413	30
										1622.21	45.8855							1794	14.5	1678.5	13.6							1678.5	13.6																	1414	22
										1653.7	42.2421							1846	11.5	1678.7	11.1							1678.7	11.1																	1416	12
										1742.47	30.134							1869	14	1678.9	10.5							1678.9	10.5																	1417	31
										1745.78	57.049							1818	16	1679.4	18.7							1679.4	18.7																	1417	13
										1746.39	44.9248							1814	11	1679.7	12.4							1679.7	12.4																	1420	30
										1766.47	27.0972							1758	14.5	1679.9	11.6							1679.9	11.6																	1421	14
										2414.27	6.6003							2546	12.5	1680.2	11.5							1680.2	11.5																	1422	26
										1238	11							2577	13	1680.7	8.4							1680.7	8.4																	1428	19
										1246	21							2673	16.5	1680.9	11.7							1680.9	11.7																	1429	31
										1252	16							1792	18.5	1681.3	14.9							1681.3	14.9																	1430	12
										1252	16							2473	14.5	1681.4	12.9							1681.4	12.9																	1435	30
										1253	18							1799	13.5	1682.2	13.3							1682.2	13.3																	1438	18
										1254	9							2762	8	1682.5	10.5							1682.5	10.5																	1438	9
										1254	8							1780	9	1683.5	13.4							1683.5	13.4																	1439	54
										1255	13							1885	13.5	1683.8	12.9							1683.8	12.9																	1441	25
										1255	16							1888	17.5	1683.9	11.2							1683.9	11.2																	1446	15
										1256	14							1817	10.5	1684.2	13.3							1684.2	13.3																	1448	9
										1258	10							1844	8.5	1684.5	12.3							1684.5	12.3																	1452	16
										1270	11							1793	16.5	1684.9	12.2							1684.9	12.2																	1458	10
										1275	27							1862	15.5	1685	13.2							1685	13.2																	1461	55
										1202.05	59.0266							1735	19.5	1685.1	10.6							1685.1	10.6																	1464	25
										1208.54	54.9894							2476	19.5	1685.7	14.9							1685.7	14.9																	1476	79
										1230.18	35.9512							1768	17	1686.8	10.7							1686.8	10.7																	1486	26
										1233.9	46.3044							1813	23	1687.4	11.4							1687.4	11.4																	1503	25
										1239.02	23.9816							2601	12	1687.6	12.4							1687.6	12.4																	1510	12
										1239.96	28.4237							1873	12	1688.8	10.5							1688.8	10.5																	1630	36
										1245.32	19.661							1800	20.5	1690.1	10							1690.1	10																	1665	8
										1245.74	19.6409							1783	15.5	1690.4	12.8							1690.4	12.8																	1713	12
										1245.77	69.4917							1778	15	1690.4	12.6							1690.4	12.6																	1720	6
										1246.19	22.9694							1776	10	1690.5	16.4							1690.5	16.4																	1727	4
										1246.49	25.6901							2636	18.5	1691.4	14.2							1691.4	14.2																	1735	11
										1247.12	42.6366							1959	12	1691.4	13.3							1691.4	13.3																	1738	4
										1247.91	86.1456							2463	11.5	1692.3	13.9							1692.3	13.9																	1744	40
										1248.78	49.5332							1851	13.5	1693.2	10.3							1693.2	10.3																	1748	7
										1249.89	48.0747							1726	16	1693.9	10.9							1693.9	10.9																	1752	19
										1250.44	24.9427							1802	11.5	1694.6	10							1694.6	10																	1753	14
										1253.8	68.1733							1901	13	1694.9	14.2							1694.9	14.2																	1756	13
										1254.39	23.6979							2688	17.5	1695.1	12.2							1695.1	12.2																	1764	14
										1258.78	25.7031							1867	19.5	1695.2	10.7							1695.2	10.7																	1765	12
										1265.81	35.9907							1769	12.5	1695.3	10.1							1695.3	10.1																	1765	15
										1266.07	51.6584							1699	21	1695.3	10.9							1695.3	10.9																	1769	18
										1267.07	20.0285							1787	13	1695.5	11.3							1695.5	11.3																	1775	12
										1267.32	34.2078							1770	14	1695.7	11.1							1695.7	11.1																	1777	10
										1269.01	52.4007							2681	6	1695.9	11.2							1695.9	11.2																	1778	15
										1269.28	50.0747							1786	15	1696.4	9							1696.4	9																	1780	10
										1273.2	26.8509							1766	10	1696.9	13.5							1696.9	13.5																	1780	9
										1273.72	51.2507							1833	21.5	1696.9	9.8							1696.9	9.8																	1785	57
										1273.93	30.5568							1860	16	1697.4	11							1697.4	11																	1792	16
										1274.32	80.8843							1770	12.5	1697.4	10.3							1697.4	10.3																	1792	7
										1277.75	30.0033							1778	21	1697.7	12.7							1697.7	12.7																	1799	10
										1277.87	33.4353							2695	13	1699	13.8							1699	13.8																	1816	22
										1278.04	19.6035							2458	14.5	1699	12.6							1699	12.6																	1828	15
										1278.51	97.7001							2565	17.5	1699.9	10.5							1699.9	10.5																	1828	6
										1280.84	30.986							2871	12.5	1699.9	8.8							1699.9	8.8																	1837	4
										1281.21	57.932							1922	15.5	1701.2	8.9							1701.2	8.9																	1888	6
										1281.55	46.8288							1845	11	1702.3	13.5							1702.3	13.5																	1918	18
										1281.84	37.3079							2475	18	1702.7	13.9							1702.7	13.9																	1923	6
										1282.93	79.6889							1786	18	1702.7	11.4							1702.7	11.4																	2525	2
										1283.12	56.1331							2481	12	1702.9	12.1							1702.9	12.1																	2563	2
										1284.88	73.7557							1773	17	1703.3	11.5							1703.3	11.5																	614.88	11.99
										1285.3	46.5523							1850	32.5	1703.4	10.4							1703.4	10.4																	884.29	17.635
										1285.36	97.5939							1771	12	1704.1	10.2							1704.1	10.2																	1031.06	31.14
										1285.8	48.6875							3220	13.5	1704.5	12.4							1704.5	12.4																	1197.24	30.395
										1285.9	94.5656							1833	11	1705.2	9.9							1705.2	9.9																	1228.27	30.405
										1286.19	67.448							1771	11	1706.7	10.7							1706.7	10.7																	1341.19	32.11
										1287.66	30.3974							1783	12.5	1707.1	14.6							1707.1	14.6																	1282.25	30.04
										1289.23	41.8414							1720	12	1707.7	12.5							1707.7	12.5																	1352.02	29.79
										1291.83	46.6316							2695	16	1708.1	20.5							1708.1	20.5																	1407.25	29.83
										1293.27	30.0446							1760	12.5	1708.1	10.5							1708.1	10.5																	1529.37	33.77
										1294.78	46.5059							1863	20	1708.7	13.2							1708.7	13.2																	1400.83	29.505
										1299.28	73.4775							2692	8	1710.4	13							1710.4	13																	1416.58	29.54
										1302.49	28.2446							1809	15	1710.7	11.9							1710.7	11.9																	1508.18	31.82
										1304.78	59.1752							1752	36	1713.4	12.3							1713.4	12.3																	1569.81	28.97
										1307.81	40.3304							1796	16	1713.8	10.6							1713.8	10.6																	1593.07	29.06
										1310.12	47.898							1784	18	1715.1	14.8							1715.1	14.8																	1574.8	28.765
										1315.51	30.5581							1846	17	1715.1	13.8							1715.1	13.8																	1637.36	31.605
										1319.63	100.424							1776	11.5	1715.8	11.1							1715.8	11.1																	1641.27	28.83
										1326.98	47.4337							1903	13.5	1716.3	11.8							1716.3	11.8																	1653.09	28.49
										1328.22	61.141							3088	10	1718.3	11							1718.3	11																	1717.32	28.45
										1328.27	55.0314							1777	23	1719.5	12.6							1719.5	12.6																	1782.16	30.265
										1328.44	79.2101							2682	15.5	1719.8	13.1							1719.8	13.1																	1664.6	28.45
										1334.61	19.4							2698	15.5	1726	15							1726	15																	1744.8	28.37
										1334.88	56.8026							2904	15.5	1728.3	11							1728.3	11																	1711.95	30.915
										1347.31	50.3217							2978	13.5	1729.3	12.4							1729.3	12.4																	1738.99	28.275
										1362.35	107.626							1761	15	1733	19.1							1733	19.1																	1810.29	28.23
										1373.08	25.379							1792	10.5	1733.5	11.4							1733.5	11.4																	1750.84	28.255
										1378.17	29.4918							1842	11.5	1740.2	10.9							1740.2	10.9																	1686.89	28.335
										1385.54	131.883							2427	25.5	1742.1	11.7							1742.1	11.7																	1823.2	28.54
										1416.72	89.0401							1836	12.5	1742.7	17.7							1742.7	17.7																	1773.08	28.135
										1434.62	39.349							2473	9.5	1746.4	10.3							1746.4	10.3																	1757.62	28.105
										1443.15	30.1284							1784	22.5	1756.7	9.4							1756.7	9.4																	1762.93	28.195
										1449.12	60.8414							3688	11.5	1757.8	10.9							1757.8	10.9																	1841.39	28.14
										1457.16	34.2523							2677	17	1762.5	14							1762.5	14																	1825.38	27.88
										1459.29	19.0638							2863	18.5	1764	11							1764	11																	1769.87	28.09
										1461.1	19.8491							2438	15	1780.5	11.8							1780.5	11.8																	1821.82	28
										1471.79	26.0161							2686	21	1782.1	11.1							1782.1	11.1																	1845.11	29.94
										1476.38	67.3553							1917	16	1790	11.3							1790	11.3																	1797.21	27.995
										1477.68	32.092							2705	29	1790.8	39.6							1790.8	39.6																	1854.48	28.075
										1478.6	46.474							1796	14.5	1793.2	12.3							1793.2	12.3																	1806.6	27.93
										1480.74	42.8353							1758	18	1819.7	11.2							1819.7	11.2																	1901.84	27.725
										1484.39	28.8414							1844	7.5	1829.5	8							1829.5	8																	2033.06	27.27
										1485.23	29.5792							1792	22	1853.7	12.1							1853.7	12.1																	2719.26	25.915
										1485.57	241.79							1802	18.5	1857.4	54.4							1857.4	54.4																	3055.74	24.715
										1486.59	28.2424							1810	17	1915.9	17.7							1915.9	17.7																	3036.97	24.71
										1491.59	41.7385							1785	20.5	1943	10.7							1943	10.7																	3308.13	24.11
										1497.62	31.0776							1779	19	2397	8.5							2397	8.5																	3269.08	24.165
										1500.22	29.5151							1751	13.5	2674.5	7.6							2674.5	7.6																	1150.43	52.4146
										1502.13	42.9194							1859	13.5	2682.4	10.7							2682.4	10.7																	1178.37	29.8593
										1517.29	44.963							1770	18	2701.5	9							2701.5	9																	1184.32	31.7237
										1522.38	42.0382							1805	15									1452.35	20.9359																	1184.46	23.1835
										1563.1	29.2443							1785	16.5									1454.37	9.82885																	1185.23	44.2925
										1568.42	34.3046																	1457.68	142.283																	1185.59	46.5574
										1581.05	91.5654																	1466	24.9386																	1186.41	45.1551
										1665.43	26.1203																	1467.71	8.9287																	1191.01	44.7323
										1677.32	51.209																	1469.1	33.6869																	1191.05	38.0377
										1734.73	31.0086																	1478.79	29.1721																	1193.09	58.6109
										1753.47	18.3394																	1483.28	116.806																	1193.25	27.9155
										1791.9	33.3341																	1484.25	24.0217																	1193.39	11.9643
																												1488.6	25.3065																	1204.01	29.9472
																												1518.64	16.0484																	1205.47	25.7113
																												1611.68	33.4865																	1207.81	29.33
																												1616.25	38.2422																	1211.14	26.7808
																												1632.62	107.35																	1213.43	22.2458
																												1635.33	14.5431																	1214.17	26.2341
																												1637.94	41.9585																	1214.66	10.1937
																												1638.46	19.9722																	1219.01	67.6844
																												1647.86	14.7661																	1219.97	24.6677
																												1649.88	28.9596																	1227.19	66.2092
																												1676.89	16.8453																	1227.62	49.5472
																												1684.77	38.7885																	1227.83	27.8771
																												1686.06	37.3146																	1229.66	26.8089
																												1686.17	14.7418																	1230.57	29.4066
																												1687.75	61.3486																	1233.66	34.8709
																												1688.17	37.1733																	1233.94	12.7973
																												1698.01	103.656																	1236.72	20.5794
																												1708.88	26.8619																	1238.33	34.8575
																												1709.93	9.64776																	1240.53	24.1999
																												1713.76	10.0982																	1241.78	51.6731
																												1728.44	32.3101																	1253.67	14.5588
																												1740.63	34.8751																	1262.94	23.0999
																												1752.79	13.6535																	1265.5	21.9019
																												1768.86	24.1844																	1266	74.4706
																												1817.11	113.404																	1267.21	76.6911
																												1831	36.1567																	1269.22	49.8442
																												2448.57	13.0701																	1273.65	123.399
																												2478.19	4.62897																	1275.2	68.3901
																												2517.62	14.8798																	1291	68.7546
																												1344.82	72.7699																	1307.98	24.7865
																												1361.87	25.52																	1309.12	168.609
																												1409.59	45.9901																	1321.93	30.6257
																												1411.99	26.2304																	1329.79	18.7329
																												1482.19	61.9383																	1352.32	140.055
																												1487.22	59.399																	1434.24	67.6121
																												1592.7	43.9728																	1435.19	11.643
																												1623.35	15.2538																	1437.78	24.8099
																												1653.17	31.231																	1443.25	19.0174
																												1657.64	22.01																	1444.23	21.2511
																												1657.85	29.4479																	1444.75	11.566
																												1663.06	33.1451																	1451.17	13.5119
																												1680.87	23.0561																	1452.8	25.5499
																												1686.07	36.4041																	1455.64	23.1826
																												1703.27	40.8223																	1456.21	50.7007
																												1718.25	38.294																	1458.38	44.7033
																												1721.11	29.9424																	1459.15	39.9803
																												1741.3	49.6089																	1460.7	25.4455
																												1746.22	53.8073																	1461.17	18.4091
																												1806.94	5.32706																	1461.49	23.8063
																												1232	23																	1466.64	29.1253
																												1237	12																	1467.52	13.7155
																												1239	18																	1468.74	27.0302
																												1245	13																	1469.09	27.1914
																												1249	13																	1470.11	22.8135
																												1252	10																	1476.32	37.0287
																												1253	14																	1476.34	115.742
																												1257	8																	1478.49	17.9852
																												1258	8																	1482.39	18.1242
																												1258	6																	1482.66	14.0478
																												1264	6																	1487.93	23.6083
																												1320	5																	1489.15	31.9832
																												1325	5																	1489.46	17.0974
																												1405	10																	1492.02	18.1868
																												1432	7																	1493.58	35.7726
																												1440	5																	1494.37	34.0946
																												1445	8																	1494.71	18.9884
																												1700	5																	1503.08	42.375
																												1711	4																	1504.61	81.1816
																												1778	5																	1507.56	33.3282
																																														1590.7	13.7889
																																														1603.87	17.0475
																																														1613.21	9.72819
																																														1634.01	54.3559
																																														1667.82	21.2567
																																														1697.99	28.9358
																																														1755.59	36.1519
																																														1805.34	14.5915
																																														1807.13	12.5407
																																														1846.79	24.443
																																														1862.48	18.3607
																																														1885.6	6.37286
																																														1889.64	13.6345
																																														1890.15	10.3878
																																														1896.88	10.4602
																																														2562.27	5.36118
																																														1200	20
																																														1321	17
																																														1662	9
																																														1668	20
																																														1669	24
																																														1675	8
																																														1680	9
																																														1680	40
																																														1702	16
																																														1724	37
																																														1733	9
																																														1756	12
																																														1758	15
																																														1758	16
																																														1760	13
																																														1761	14
																																														1762	8
																																														1776	10
																																														1791	14
																																														1791	19
																																														1793	6
																																														1794	22
																																														1801	11
																																														1804	16
																																														1820	13
																																														1822	8
																																														1822	6
																																														1829	11
																																														1838	7
																																														1840	41
																																														1850	14
																																														1856	15
																																														1886	6
																																														1894	8
																																														1894	10
																																														1895	10
																																														1898	9
																																														1901	7
																																														1908	6
																																														1908	8
																																														1915	7
																																														1920	11
																																														1922	16
																																														1928	6
																																														1933	7
																																														1934	5
																																														1937	14
																																														1938	7
																																														1942	17
																																														1943	11
																																														1950	8
																																														1952	5
																																														1959	18
																																														1964	5
																																														1965	3
																																														1970	4
																																														1970	8
																																														1989	7
																																														2009	8
																																														2019	4
																																														2083	8
																																														2083	7
																																														2213	5
																																														2540	7
																																														2543	3
																																														2556	2
																																														2557	10
																																														2580	6
																																														2583	3
																																														2616	5
																																														2617	3
																																														2644	2
																																														2770	7
																																														2792	4
																																														2868	3
																																														2875	2
																																														2887	2
																																														2898	2
																																														2911	3
																																														3101	8
																																														1174	151
																																														1229	64
																																														1237	13
																																														1246	150
																																														1260	14
																																														1315	120
																																														1386	15
																																														1406	11
																																														1414	32
																																														1428	21
																																														1430	19
																																														1435	23
																																														1444	16
																																														1444	47
																																														1448	12
																																														1450	5
																																														1451	47
																																														1454	14
																																														1457	11
																																														1464	18
																																														1477	37
																																														1504	16
																																														1625	17
																																														1632	91
																																														1648	10
																																														1653	15
																																														1667	31
																																														1674	9
																																														1679	16
																																														1686	18
																																														1709	7
																																														1709	7
																																														1711	8
																																														1720	13
																																														1724	17
																																														1732	26
																																														1737	10
																																														1741	6
																																														1753	11
																																														1755	8
																																														1759	24
																																														1770	10
																																														1776	7
																																														1777	18
																																														1783	7
																																														1801	9
																																														1801	13
																																														1815	9
																																														1818	14
																																														1821	6
																																														1822	8
																																														1826	8
																																														1839	8
																																														1849	27
																																														1865	15
																																														1871	11
																																														1887	13
																																														1891	18
																																														1959	10
																																														2481	5
																																														2518	6
																																														2590	2
																																														2638	7
																																														2671	5
																																														2683	3
																																														2690	5
																																														2696	4
																																														2703	5
																																														2706	3
																																														2722	4
																																														2735	3
																																														2749	10
																																														2783	14
																																														1184	37
																																														1197	22
																																														1235	17
																																														1251	72
																																														1283	37
																																														1284	29
																																														1290	39
																																														1420	38
																																														1425	65
																																														1430	19
																																														1440	16
																																														1443	24
																																														1446	54
																																														1447	38
																																														1449	16
																																														1460	27
																																														1679	22
																																														1683	19
																																														1696	29
																																														1708	33
																																														1710	28
																																														1715	10
																																														1725	10
																																														1729	24
																																														1735	20
																																														1736	8
																																														1743	33
																																														1746	27
																																														1746	22
																																														1748	46
																																														1753	7
																																														1757	20
																																														1758	31
																																														1761	43
																																														1774	8
																																														1777	10
																																														1789	19
																																														1794	35
																																														1797	32
																																														1808	8
																																														1812	12
																																														1818	8
																																														1820	10
																																														1833	20
																																														1834	10
																																														1843	24
																																														1852	5
																																														1871	7
																																														1871	9
																																														1873	18
																																														1896	12
																																														2500	6
																																														2527	3
																																														2670	4
																																														2673	4
																																														2674	5
																																														2680	3
																																														2684	6
																																														2691	4
																																														2692	3
																																														2699	4
																																														2700	4
																																														2701	2
																																														2707	6
																																														2713	3
																																														2714	4
																																														2715	3
																																														2717	4
																																														2717	3
																																														2720	7
																																														2726	5
																																														2728	9
																																														2732	5
																																														2736	6
																																														2738	3
																																														2746	11
																																														2757	4
																																														2765	3
																																														2802	4
																																														2862	5
																																														2892	3
																																														3025	4
																																														3209	2
[truncated: 104 more columns]

## Sheet: Basal McCoy
Sample	Lab	Analysis ID	ppm U	Th/U	6/8 Age	1s	7/6 Age	1s	Best Age	1s	Conc	Data Source
MC7	Stanford	MC7-26	73	0.438356	179.5	3.9			179.5	3.9	NA	Barth et al. (2004)
MC7	Stanford	MC7-10	124	0.185484	189.9	3.8			189.9	3.8	NA	Barth et al. (2004)
MC7	Stanford	MC7-20	114	0.192982	195.6	3.9			195.6	3.9	NA	Barth et al. (2004)
MC7	Stanford	MC7-7	114	0.333333	199.6	4.1			199.6	4.1	NA	Barth et al. (2004)
MC7	Stanford	MC7-28	469	0.876333	214.5	4.1			214.5	4.1	NA	Barth et al. (2004)
MC7	Stanford	MC7-21	242	0.867769	224.1	4.4			224.1	4.4	NA	Barth et al. (2004)
MC7	Stanford	MC7-24	61	0.901639	228.6	6.1			228.6	6.1	NA	Barth et al. (2004)
MC7	Stanford	MC7-11	734	0.0980926	911	13.7	920.1	20.1	920.1	20.1	99.011	Barth et al. (2004)
MC7	Stanford	MC7-4	64	0.296875	960	17.1	930.4	45.3	930.4	45.3	103.181	Barth et al. (2004)
MC7	Stanford	MC7-15	110	0.318182	950.6	15.9	986.8	32.3	986.8	32.3	96.3316	Barth et al. (2004)
MC7	Stanford	MC7-18	41	1.12195	1125.6	24.2	1034.4	54.5	1034.4	54.5	108.817	Barth et al. (2004)
MC7	Stanford	MC7-1	679	0.209131	1087.5	17	1040	17.2	1040	17.2	104.567	Barth et al. (2004)
MC7	Stanford	MC7-16	81	0.987654	1186.1	22.2	1095.5	36.8	1095.5	36.8	108.27	Barth et al. (2004)
MC7	Stanford	MC7-5	87	0.528736	1154.3	20.1	1098.6	35.5	1098.6	35.5	105.07	Barth et al. (2004)
MC7	Stanford	MC7-8	496	0.552419	1042	16.8	1106.6	21.3	1106.6	21.3	94.1623	Barth et al. (2004)
MC7	Stanford	MC7-22	67	0.268657	1135	19.8	1143.7	32.5	1143.7	32.5	99.2393	Barth et al. (2004)
MC7	Stanford	MC7-19	274	0.0620438	1329.4	20.3	1319.5	20.4	1319.5	20.4	100.75	Barth et al. (2004)
MC7	Stanford	MC7-29	373	0.131367	1307.8	19.2	1421.3	11.6	1421.3	11.6	92.0144	Barth et al. (2004)
MC7	Stanford	MC7-23	238	0.470588	1471.4	22.7	1429.2	13.7	1429.2	13.7	102.953	Barth et al. (2004)
MC7	Stanford	MC7-9	457	0.0940919	1240.4	18.3	1648.4	12	1648.4	12	75.2487	Barth et al. (2004)
MC7	Stanford	MC7-2	770	0.54026	1631.5	349.7	1663.8	17.9	1663.8	17.9	98.0587	Barth et al. (2004)
MC7	Stanford	MC7-27	115	0.469565	1570.2	24.8	1670	17	1670	17	94.024	Barth et al. (2004)
MC7	Stanford	MC7-13	224	0.459821	1695.7	25.9	1678.5	13.8	1678.5	13.8	101.025	Barth et al. (2004)
MC7	Stanford	MC7-17	121	0.404959	1769.6	27.3	1678.5	16.9	1678.5	16.9	105.427	Barth et al. (2004)
MC7	Stanford	MC7-12	139	0.446043	1796.2	32.7	1705.6	17	1705.6	17	105.312	Barth et al. (2004)
MC7	Stanford	MC7-14	54	0.259259	1764.8	28.9	1709.2	25	1709.2	25	103.253	Barth et al. (2004)
MC7	Stanford	MC7-25	110	0.4	1749.7	26.9	1781.4	15.3	1781.4	15.3	98.2205	Barth et al. (2004)
MC7	Stanford	MC7-3	114	0.359649	1799.4	27.7	1785.5	17.1	1785.5	17.1	100.778	Barth et al. (2004)
MC7	Stanford	MC7-6	211	0.350711	1855.6	27.5	1795.1	23	1795.1	23	103.37	Barth et al. (2004)
MC9	Stanford	MC9-22	335	0.307463	183.4	3.5			183.4	3.5	NA	Barth et al. (2004)
MC9	Stanford	MC9-5	101	0.584158	191.2	4			191.2	4	NA	Barth et al. (2004)
MC9	Stanford	MC9-33	441	0.478458	224.6	3.9			224.6	3.9	NA	Barth et al. (2004)
MC9	Stanford	MC9-31	355	0.509859	225.5	4			225.5	4	NA	Barth et al. (2004)
MC9	Stanford	MC9-30	178	0.38764	310.9	5.5			310.9	5.5	NA	Barth et al. (2004)
MC9	Stanford	MC9-35	461	0.624729	404.1	7.1			404.1	7.1	NA	Barth et al. (2004)
MC9	Stanford	MC9-34	314	0.292994	412.1	7.1			412.1	7.1	NA	Barth et al. (2004)
MC9	Stanford	MC9-17	288	1.15625	441.1	8.7			441.1	8.7	NA	Barth et al. (2004)
MC9	Stanford	MC9-15	207	0.806763	480.1	9.1			480.1	9.1	NA	Barth et al. (2004)
MC9	Stanford	MC9-4	55	0.290909	996	18.2	937.5	42.5	937.5	42.5	106.24	Barth et al. (2004)
MC9	Stanford	MC9-12	263	0.330798	1081	17	1013.9	19	1013.9	19	106.618	Barth et al. (2004)
MC9	Stanford	MC9-26	185	0.345946	1050.3	16.7	1052	21.7	1052	21.7	99.8384	Barth et al. (2004)
MC9	Stanford	MC9-7	1038	0.00289017	1072.8	15.5	1091.8	8.3	1091.8	8.3	98.2598	Barth et al. (2004)
MC9	Stanford	MC9-8	81	0.320988	1110.5	18.8	1102.6	40.3	1102.6	40.3	100.716	Barth et al. (2004)
MC9	Stanford	MC9-11	57	0.508772	1097	19.7	1108.7	38.3	1108.7	38.3	98.9447	Barth et al. (2004)
MC9	Stanford	MC9-25	30	0.733333	1025.9	21.2	1145.1	50.6	1145.1	50.6	89.5904	Barth et al. (2004)
MC9	Stanford	MC9-29	261	0.145594	1242.7	18.6	1170.6	16.3	1170.6	16.3	106.159	Barth et al. (2004)
MC9	Stanford	MC9-3	267	0.741573	1286	21.2	1331.4	14.4	1331.4	14.4	96.5901	Barth et al. (2004)
MC9	Stanford	MC9-23	96	0.583333	1043.1	17.9	1355	35.8	1355	35.8	76.9815	Barth et al. (2004)
MC9	Stanford	MC9-16	399	0.325815	1367.9	20.7	1374.5	15.2	1374.5	15.2	99.5198	Barth et al. (2004)
MC9	Stanford	MC9-27	175	0.291429	1460.7	22.3	1437.1	16.2	1437.1	16.2	101.642	Barth et al. (2004)
MC9	Stanford	MC9-10	77	1	1498.5	29.1	1469.1	25.1	1469.1	25.1	102.001	Barth et al. (2004)
MC9	Stanford	MC9-28	91	0.428571	1627.7	26	1574	21.6	1574	21.6	103.412	Barth et al. (2004)
MC9	Stanford	MC9-6	376	0.132979	1184.8	17.4	1580.9	19.4	1580.9	19.4	74.9447	Barth et al. (2004)
MC9	Stanford	MC9-21	659	0.241275	1570.8	22.7	1659.3	9.2	1659.3	9.2	94.6664	Barth et al. (2004)
MC9	Stanford	MC9-9	509	0.255403	1309.7	20	1725.1	16.1	1725.1	16.1	75.9202	Barth et al. (2004)
MC9	Stanford	MC9-1	83	0.60241	1725.5	29	1752.3	18.7	1752.3	18.7	98.4706	Barth et al. (2004)
MC9	Stanford	MC9-2	30	0.9	1758.7	33.5	1777.7	35.7	1777.7	35.7	98.9312	Barth et al. (2004)
MC9	Stanford	MC9-32	30	0.6	2957.3	46.7	2858.3	14.2	2858.3	14.2	103.464	Barth et al. (2004)
MC9	Stanford	MC9-24	156	0.519231	2913.2	40.2	2880.9	6.7	2880.9	6.7	101.121	Barth et al. (2004)
3-24-04-1&2	UA	3-24-04-12-88	308.6	1.27649	164.812	2.04498	348.058	306.975	164.812	2.04498	NA	Spencer et al. (2011)
3-24-04-1&2	UA	3-24-04-12-42	212.599	0.429917	187.476	3.07479	351.055	278.443	187.476	3.07479	NA	Spencer et al. (2011)
3-24-04-1&2	UA	3-24-04-12-5	209.041	0.419143	187.859	2.70074	112.197	464.608	187.859	2.70074	NA	Spencer et al. (2011)
3-24-04-1&2	UA	3-24-04-12-86	173.697	0.42323	192.297	2.13674	102.642	474.299	192.297	2.13674	NA	Spencer et al. (2011)
3-24-04-1&2	UA	3-24-04-12-55	171.028	0.650972	195.051	2.93421	125.044	532.623	195.051	2.93421	NA	Spencer et al. (2011)
3-24-04-1&2	UA	3-24-04-12-9	691.069	0.184307	200.374	4.49901	313.649	120.154	200.374	4.49901	NA	Spencer et al. (2011)
3-24-04-1&2	UA	3-24-04-12-45	185.64	0.457546	202.1	6.65069	387.186	316.241	202.1	6.65069	NA	Spencer et al. (2011)
3-24-04-1&2	UA	3-24-04-12-4	130.913	0.405662	203.773	5.86795	331.552	464.868	203.773	5.86795	NA	Spencer et al. (2011)
3-24-04-1&2	UA	3-24-04-12-1	95.7047	0.638053	204.526	7.88357	-87.0321	846.133	204.526	7.88357	NA	Spencer et al. (2011)
3-24-04-1&2	UA	3-24-04-12-29	248.805	0.487063	207.26	3.04406	-233.206	720.682	207.26	3.04406	NA	Spencer et al. (2011)
3-24-04-1&2	UA	3-24-04-12-21	124.713	0.809648	213.305	9.09614	185.608	658.87	213.305	9.09614	NA	Spencer et al. (2011)
3-24-04-1&2	UA	3-24-04-12-32	266.302	1.10082	214.228	1.84203	395.954	220.894	214.228	1.84203	NA	Spencer et al. (2011)
3-24-04-1&2	UA	3-24-04-12-70	168.063	0.601979	216.704	4.93882	659.353	418.724	216.704	4.93882	NA	Spencer et al. (2011)
3-24-04-1&2	UA	3-24-04-12-40	176.878	1.06733	217.184	4.37442	461.763	557.519	217.184	4.37442	NA	Spencer et al. (2011)
3-24-04-1&2	UA	3-24-04-12-96	123.877	0.716521	217.581	8.17187	533.102	597.964	217.581	8.17187	NA	Spencer et al. (2011)
3-24-04-1&2	UA	3-24-04-12-39	590.7	1.07225	217.665	2.01654	325.631	193.861	217.665	2.01654	NA	Spencer et al. (2011)
3-24-04-1&2	UA	3-24-04-12-85	119.456	0.485137	217.828	6.96122	954.694	471.765	217.828	6.96122	NA	Spencer et al. (2011)
3-24-04-1&2	UA	3-24-04-12-94	878.65	0.836535	219.372	2.50302	240.039	121.068	219.372	2.50302	NA	Spencer et al. (2011)
3-24-04-1&2	UA	3-24-04-12-67	273.85	0.550703	219.973	3.42222	472.494	381.145	219.973	3.42222	NA	Spencer et al. (2011)
3-24-04-1&2	UA	3-24-04-12-2	128.514	0.687603	220.951	3.92831	563.647	512.076	220.951	3.92831	NA	Spencer et al. (2011)
3-24-04-1&2	UA	3-24-04-12-56	239.558	0.565396	222.274	3.43952	-48.7124	511.392	222.274	3.43952	NA	Spencer et al. (2011)
3-24-04-1&2	UA	3-24-04-12-12	215.322	0.731863	222.882	4.34015	-117.508	372.568	222.882	4.34015	NA	Spencer et al. (2011)
3-24-04-1&2	UA	3-24-04-12-64	328.415	1.0217	223.697	2.47061	355.348	300.794	223.697	2.47061	NA	Spencer et al. (2011)
3-24-04-1&2	UA	3-24-04-12-92	179.197	0.664828	224.52	3.54099	215.008	451.503	224.52	3.54099	NA	Spencer et al. (2011)
3-24-04-1&2	UA	3-24-04-12-18	201.438	0.945025	225.509	3.37362	148.991	505.8	225.509	3.37362	NA	Spencer et al. (2011)
3-24-04-1&2	UA	3-24-04-12-13	312.186	1.02332	226.22	5.31545	345.478	276.914	226.22	5.31545	NA	Spencer et al. (2011)
3-24-04-1&2	UA	3-24-04-12-84	174.964	0.697799	228.13	2.39672	328.61	339.702	228.13	2.39672	NA	Spencer et al. (2011)
3-24-04-1&2	UA	3-24-04-12-3	244.654	0.445892	229.334	2.4456	357.871	197.606	229.334	2.4456	NA	Spencer et al. (2011)
3-24-04-1&2	UA	3-24-04-12-17	108.78	0.806548	229.341	5.01156	519.01	341.524	229.341	5.01156	NA	Spencer et al. (2011)
3-24-04-1&2	UA	3-24-04-12-74	304.961	0.887246	229.867	1.97177	375.38	259.36	229.867	1.97177	NA	Spencer et al. (2011)
3-24-04-1&2	UA	3-24-04-12-43	586.548	1.11087	230.388	2.17424	172.956	175.561	230.388	2.17424	NA	Spencer et al. (2011)
3-24-04-1&2	UA	3-24-04-12-72	217.802	1.16416	232.128	4.15525	41.9293	268.968	232.128	4.15525	NA	Spencer et al. (2011)
3-24-04-1&2	UA	3-24-04-12-35	97.1065	0.66211	235.047	6.66403	190.706	790.682	235.047	6.66403	NA	Spencer et al. (2011)
3-24-04-1&2	UA	3-24-04-12-10	667.533	0.495634	235.057	5.79463	273.79	174.212	235.057	5.79463	NA	Spencer et al. (2011)
3-24-04-1&2	UA	3-24-04-12-20	336.8	0.446253	237.161	3.02953	209.4	272.736	237.161	3.02953	NA	Spencer et al. (2011)
3-24-04-1&2	UA	3-24-04-12-59	118.377	0.466593	237.907	5.39572	-201.801	1129.7	237.907	5.39572	NA	Spencer et al. (2011)
3-24-04-1&2	UA	3-24-04-12-78	212.249	0.323898	247.23	4.78591	351.706	476.115	247.23	4.78591	NA	Spencer et al. (2011)
3-24-04-1&2	UA	3-24-04-12-65	1359.2	0.345011	256.151	16.879	371.454	113.618	256.151	16.879	NA	Spencer et al. (2011)
3-24-04-1&2	UA	3-24-04-12-90	59.3369	0.644692	261.93	10.6071	1537.92	602.748	261.93	10.6071	NA	Spencer et al. (2011)
3-24-04-1&2	UA	3-24-04-12-76	403.577	0.14838	372.336	8.61465	237.591	161.778	372.336	8.61465	NA	Spencer et al. (2011)
3-24-04-1&2	UA	3-24-04-12-49	43.1075	0.888324	527.794	12.1279	834.737	613.039	527.794	12.1279	NA	Spencer et al. (2011)
3-24-04-1&2	UA	3-24-04-12-68	302.4	0.612575	626.27	16.2346	655.728	64.0273	626.27	16.2346	NA	Spencer et al. (2011)
3-24-04-1&2	UA	3-24-04-12-22	140.268	0.614816	1003.23	25.755	1092.89	95.0699	1003.23	25.755	91.7962	Spencer et al. (2011)
3-24-04-1&2	UA	3-24-04-12-48	71.0102	0.67131	1029.94	57.2906	1427.84	403.955	1029.94	57.2906	72.1328	Spencer et al. (2011)
3-24-04-1&2	UA	3-24-04-12-44	62.7607	1.30944	1062.15	34.0855	1130.05	183.833	1062.15	34.0855	93.9914	Spencer et al. (2011)
3-24-04-1&2	UA	3-24-04-12-81	100.045	0.360316	1078.19	14.4034	1167.14	133.405	1078.19	14.4034	92.3785	Spencer et al. (2011)
3-24-04-1&2	UA	3-24-04-12-75	626.771	0.473748	1082.71	18.7376	1115.84	21.4273	1082.71	18.7376	97.0306	Spencer et al. (2011)
3-24-04-1&2	UA	3-24-04-12-47	379.206	0.921835	1092.79	13.5707	1182	28.6019	1092.79	13.5707	92.4527	Spencer et al. (2011)
3-24-04-1&2	UA	3-24-04-12-58	24.2632	0.712813	1098.52	29.216	1115.99	360.092	1098.52	29.216	98.4343	Spencer et al. (2011)
3-24-04-1&2	UA	3-24-04-12-41	74.0296	0.624771	1105.42	23.3698	1081.61	64.1993	1105.42	23.3698	102.201	Spencer et al. (2011)
3-24-04-1&2	UA	3-24-04-12-60	46.3696	0.409517	1107.78	47.6892	1184.29	282.161	1107.78	47.6892	93.5399	Spencer et al. (2011)
3-24-04-1&2	UA	3-24-04-12-71	325.935	0.86315	1110.33	11.7302	1167.59	30.9852	1110.33	11.7302	95.0963	Spencer et al. (2011)
3-24-04-1&2	UA	3-24-04-12-73	65.9149	0.695709	1123.99	28.0666	1138.8	76.1603	1123.99	28.0666	98.6996	Spencer et al. (2011)
3-24-04-1&2	UA	3-24-04-12-57	68.4221	0.721461	1126.54	19.134	1193.88	170.159	1126.54	19.134	94.3592	Spencer et al. (2011)
3-24-04-1&2	UA	3-24-04-12-38	57.5306	0.318429	1131.74	9.25092	1262.47	186.459	1131.74	9.25092	89.6453	Spencer et al. (2011)
3-24-04-1&2	UA	3-24-04-12-61	40.3308	0.875245	1147.55	23.6024	1186.04	226.592	1147.55	23.6024	96.7543	Spencer et al. (2011)
3-24-04-1&2	UA	3-24-04-12-6	162.968	0.640382	1151.32	23.6195	1116.55	47.8574	1151.32	23.6195	103.114	Spencer et al. (2011)
3-24-04-1&2	UA	3-24-04-12-91	214.298	0.291387	1158.54	22.7993	1222.34	54.3564	1158.54	22.7993	94.7805	Spencer et al. (2011)
3-24-04-1&2	UA	3-24-04-12-83	26.2851	0.487116	1179.77	31.3905	1272.64	303.216	1179.77	31.3905	92.7027	Spencer et al. (2011)
3-24-04-1&2	UA	3-24-04-12-53	173.158	0.778111	1397.1	19.0941	1368.1	41.5664	1368.1	41.5664	102.12	Spencer et al. (2011)
3-24-04-1&2	UA	3-24-04-12-62	96.9987	0.518254	1410.73	11.2346	1420.87	72.7234	1420.87	72.7234	99.2868	Spencer et al. (2011)
3-24-04-1&2	UA	3-24-04-12-95	843.306	0.279179	1336.73	29.6983	1423.88	17.9699	1423.88	17.9699	93.8793	Spencer et al. (2011)
3-24-04-1&2	UA	3-24-04-12-50	173.778	0.529359	1387.3	14.7303	1427.37	38.1432	1427.37	38.1432	97.1928	Spencer et al. (2011)
3-24-04-1&2	UA	3-24-04-12-100	372.952	0.297044	1206.53	40.6079	1428.8	16.6764	1428.8	16.6764	84.4438	Spencer et al. (2011)
3-24-04-1&2	UA	3-24-04-12-37	247.08	0.573059	1315.59	41.8906	1434.14	42.203	1434.14	42.203	91.7338	Spencer et al. (2011)
3-24-04-1&2	UA	3-24-04-12-63	127.921	0.583923	1423.25	27.715	1439.01	30.2837	1439.01	30.2837	98.9054	Spencer et al. (2011)
3-24-04-1&2	UA	3-24-04-12-36	178.819	0.422564	1305.51	9.9292	1439.21	35.782	1439.21	35.782	90.7106	Spencer et al. (2011)
3-24-04-1&2	UA	3-24-04-12-24	90.6903	0.734149	1225.57	97.2219	1471.45	41.6686	1471.45	41.6686	83.2899	Spencer et al. (2011)
3-24-04-1&2	UA	3-24-04-12-31	369.312	0.304238	1357.06	44.4232	1479.79	88.8526	1479.79	88.8526	91.7064	Spencer et al. (2011)
3-24-04-1&2	UA	3-24-04-12-98	347.691	0.268316	1221.27	28.0372	1482.8	13.5405	1482.8	13.5405	82.3625	Spencer et al. (2011)
3-24-04-1&2	UA	3-24-04-12-54	96.9987	1.60594	1372.62	8.66013	1485.56	88.0565	1485.56	88.0565	92.3975	Spencer et al. (2011)
3-24-04-1&2	UA	3-24-04-12-11	67.2089	0.861685	1557.11	28.7828	1591.61	47.1821	1591.61	47.1821	97.8322	Spencer et al. (2011)
3-24-04-1&2	UA	3-24-04-12-87	137.815	0.501409	1327.07	27.5876	1621.89	49.8398	1621.89	49.8398	81.8223	Spencer et al. (2011)
3-24-04-1&2	UA	3-24-04-12-97	148.544	0.410026	1657.38	22.9468	1658.84	18.9465	1658.84	18.9465	99.9117	Spencer et al. (2011)
3-24-04-1&2	UA	3-24-04-12-93	79.8797	0.664338	1620.92	15.0902	1670.51	47.6395	1670.51	47.6395	97.0313	Spencer et al. (2011)
3-24-04-1&2	UA	3-24-04-12-80	28.5227	0.774873	1674.33	30.4901	1672.34	130.56	1672.34	130.56	100.119	Spencer et al. (2011)
3-24-04-1&2	UA	3-24-04-12-89	214.001	0.395805	1662.4	14.8011	1679.67	14.5286	1679.67	14.5286	98.9721	Spencer et al. (2011)
3-24-04-1&2	UA	3-24-04-12-27	92.0113	0.42603	1268.2	87.8509	1686.15	44.017	1686.15	44.017	75.2129	Spencer et al. (2011)
3-24-04-1&2	UA	3-24-04-12-34	204.134	0.5867	1464.79	9.54763	1693.45	121.852	1693.45	121.852	86.4975	Spencer et al. (2011)
3-24-04-1&2	UA	3-24-04-12-46	89.5041	0.34773	1649.22	57.774	1699.6	54.8748	1699.6	54.8748	97.036	Spencer et al. (2011)
3-24-04-1&2	UA	3-24-04-12-82	44.6712	0.728469	1539.09	18.8999	1700.52	84.9367	1700.52	84.9367	90.5072	Spencer et al. (2011)
3-24-04-1&2	UA	3-24-04-12-66	314.72	0.469048	1679.03	79.2359	1704.89	59.3431	1704.89	59.3431	98.4829	Spencer et al. (2011)
3-24-04-1&2	UA	3-24-04-12-33	76.6446	0.630697	1691.04	19.7856	1714.78	25.7853	1714.78	25.7853	98.6159	Spencer et al. (2011)
3-24-04-1&2	UA	3-24-04-12-52	434.634	0.455572	1565.19	18.2075	1716.92	17.8073	1716.92	17.8073	91.1626	Spencer et al. (2011)
3-24-04-1&2	UA	3-24-04-12-99	257.675	0.565702	1540.39	20.828	1734.85	15.9741	1734.85	15.9741	88.7905	Spencer et al. (2011)
3-24-04-1&2	UA	3-24-04-12-7	109.13	0.722009	1740.18	14.0391	1749.13	54.4175	1749.13	54.4175	99.4884	Spencer et al. (2011)
3-24-04-1&2	UA	3-24-04-12-8	185.182	0.255507	1741.23	21.8555	1751.19	24.8078	1751.19	24.8078	99.4312	Spencer et al. (2011)
3-24-04-1&2	UA	3-24-04-12-28	104.682	0.60027	1704.36	97.5069	1757.42	52.9279	1757.42	52.9279	96.9809	Spencer et al. (2011)
3-24-04-1&2	UA	3-24-04-12-16	90.0433	1.43335	1644.47	55.3313	1757.99	168.13	1757.99	168.13	93.5427	Spencer et al. (2011)
3-24-04-1&2	UA	3-24-04-12-25	267.65	0.635586	1749.95	35.0957	1760.74	20.8704	1760.74	20.8704	99.3871	Spencer et al. (2011)
3-24-04-1&2	UA	3-24-04-12-23	164.315	0.624819	1622.98	10.0471	1768.5	13.6156	1768.5	13.6156	91.7715	Spencer et al. (2011)
3-24-04-1&2	UA	3-24-04-12-69	174.452	0.366297	1761.74	17.5744	1788.82	19.0363	1788.82	19.0363	98.486	Spencer et al. (2011)
3-24-04-1&2	UA	3-24-04-12-30	121.262	0.510724	1471.15	119.187	1804.76	38.1429	1804.76	38.1429	81.515	Spencer et al. (2011)
3-24-04-1&2	UA	3-24-04-12-77	63.4616	0.517121	1816.72	20.1092	1851.24	41.8803	1851.24	41.8803	98.1353	Spencer et al. (2011)
3-24-04-1&2	UA	3-24-04-12-15	46.1539	1.83778	2541.83	59.0645	2731.31	32.2003	2731.31	32.2003	93.0625	Spencer et al. (2011)
3-24-04-3A&3B	UA	3-24-04-3-14	166.06	1.51518	163.291	2.08862	-119.363	463.413	163.291	2.08862	NA	Spencer et al. (2011)
3-24-04-3A&3B	UA	3-24-04-3-57	70.5586	1.7709	165.222	4.82581	1000.5	393.845	165.222	4.82581	NA	Spencer et al. (2011)
3-24-04-3A&3B	UA	3-24-04-3-89	149.256	0.587566	188.003	5.04307	282.116	233.67	188.003	5.04307	NA	Spencer et al. (2011)
3-24-04-3A&3B	UA	3-24-04-3-63	59.3609	0.903376	188.736	4.13096	419.54	686.019	188.736	4.13096	NA	Spencer et al. (2011)
3-24-04-3A&3B	UA	3-24-04-3-3	63.359	0.662853	194.788	6.27365	600.695	733.881	194.788	6.27365	NA	Spencer et al. (2011)
3-24-04-3A&3B	UA	3-24-04-3-28	171.395	0.800918	198.094	3.37878	416.197	318.266	198.094	3.37878	NA	Spencer et al. (2011)
3-24-04-3A&3B	UA	3-24-04-3-38	162.246	1.14076	198.794	5.05539	80.2292	204.993	198.794	5.05539	NA	Spencer et al. (2011)
3-24-04-3A&3B	UA	3-24-04-3--9	134.672	0.867259	202.384	2.25516	537.59	198.729	202.384	2.25516	NA	Spencer et al. (2011)
3-24-04-3A&3B	UA	3-24-04-3-31	130.887	0.789358	202.645	2.45962	96.0996	227.391	202.645	2.45962	NA	Spencer et al. (2011)
3-24-04-3A&3B	UA	3-24-04-3-99	129.592	2.04065	203.821	4.13733	265.12	367.518	203.821	4.13733	NA	Spencer et al. (2011)
3-24-04-3A&3B	UA	3-24-04-3-2	140.619	1.15434	205.445	3.50222	431.475	269.392	205.445	3.50222	NA	Spencer et al. (2011)
3-24-04-3A&3B	UA	3-24-04-3-47	245.283	1.46033	205.578	4.39157	380.396	176.004	205.578	4.39157	NA	Spencer et al. (2011)
3-24-04-3A&3B	UA	3-24-04-3-100	64.227	1.4483	206.835	6.72674	525.111	537.509	206.835	6.72674	NA	Spencer et al. (2011)
3-24-04-3A&3B	UA	3-24-04-3-8	145.329	0.86954	207.745	5.83064	142.994	429.912	207.745	5.83064	NA	Spencer et al. (2011)
3-24-04-3A&3B	UA	3-24-04-3-68	76.0792	0.448996	208.691	4.14801	790.055	549.06	208.691	4.14801	NA	Spencer et al. (2011)
3-24-04-3A&3B	UA	3-24-04-3-39	94.2489	0.690196	209.229	4.29108	206.769	474.919	209.229	4.29108	NA	Spencer et al. (2011)
3-24-04-3A&3B	UA	3-24-04-3-55	162.929	0.726078	209.932	9.52385	311.056	240.258	209.932	9.52385	NA	Spencer et al. (2011)
3-24-04-3A&3B	UA	3-24-04-3--10	152.23	2.06951	210.35	4.87656	34.5462	475.952	210.35	4.87656	NA	Spencer et al. (2011)
3-24-04-3A&3B	UA	3-24-04-3-81	78.6119	0.625857	211.043	4.28685	61.6905	934.961	211.043	4.28685	NA	Spencer et al. (2011)
3-24-04-3A&3B	UA	3-24-04-3-72	26.4364	0.759306	211.117	9.34225	369.321	1008.13	211.117	9.34225	NA	Spencer et al. (2011)
3-24-04-3A&3B	UA	3-24-04-3-49	75.5528	0.673785	214.329	7.62129	430.635	593.498	214.329	7.62129	NA	Spencer et al. (2011)
3-24-04-3A&3B	UA	3-24-04-3-21	227.939	1.11324	215.105	2.29288	196.168	187.657	215.105	2.29288	NA	Spencer et al. (2011)
3-24-04-3A&3B	UA	3-24-04-3-22	444.31	1.7798	219.323	4.63641	263.985	116.534	219.323	4.63641	NA	Spencer et al. (2011)
3-24-04-3A&3B	UA	3-24-04-3-98	197.704	1.55736	219.943	3.59209	387.028	222.897	219.943	3.59209	NA	Spencer et al. (2011)
3-24-04-3A&3B	UA	3-24-04-3-94	155.018	0.476537	220.676	6.25147	325.246	175.917	220.676	6.25147	NA	Spencer et al. (2011)
3-24-04-3A&3B	UA	3-24-04-3-84	172.306	0.574768	221.805	2.9481	224.172	286.239	221.805	2.9481	NA	Spencer et al. (2011)
3-24-04-3A&3B	UA	3-24-04-3-71	102.43	0.57351	223.124	4.78996	362.034	404.105	223.124	4.78996	NA	Spencer et al. (2011)
3-24-04-3A&3B	UA	3-24-04-3-79	482.741	1.47023	223.483	1.64785	298.881	90.5726	223.483	1.64785	NA	Spencer et al. (2011)
3-24-04-3A&3B	UA	3-24-04-3-33	148.786	1.38646	223.71	3.7657	424.099	164.008	223.71	3.7657	NA	Spencer et al. (2011)
3-24-04-3A&3B	UA	3-24-04-3-40	81.7137	1.11111	224.509	5.91879	313.479	550.605	224.509	5.91879	NA	Spencer et al. (2011)
3-24-04-3A&3B	UA	3-24-04-3-12	103.611	0.894986	225.09	5.04546	197.424	441.552	225.09	5.04546	NA	Spencer et al. (2011)
3-24-04-3A&3B	UA	3-24-04-3-35	43.4108	1.00609	225.112	4.83994	1338.22	316.589	225.112	4.83994	NA	Spencer et al. (2011)
3-24-04-3A&3B	UA	3-24-04-3-24	132.907	0.68465	225.385	4.61081	433.967	319.566	225.385	4.61081	NA	Spencer et al. (2011)
3-24-04-3A&3B	UA	3-24-04-3-85	207.592	1.83847	225.45	3.25969	467.893	185.1	225.45	3.25969	NA	Spencer et al. (2011)
3-24-04-3A&3B	UA	3-24-04-3-58	107.922	1.85381	225.692	6.58896	813.381	274.3	225.692	6.58896	NA	Spencer et al. (2011)
3-24-04-3A&3B	UA	3-24-04-3-27	103.355	0.969685	226.032	2.20708	130.751	401.343	226.032	2.20708	NA	Spencer et al. (2011)
3-24-04-3A&3B	UA	3-24-04-3-48	51.4783	1.04508	226.167	6.57129	289.451	637.374	226.167	6.57129	NA	Spencer et al. (2011)
3-24-04-3A&3B	UA	3-24-04-3-51	112.49	1.26558	227.181	12.0616	443.961	150.695	227.181	12.0616	NA	Spencer et al. (2011)
3-24-04-3A&3B	UA	3-24-04-3-36	118.949	0.651676	227.424	2.95437	379.808	354.261	227.424	2.95437	NA	Spencer et al. (2011)
3-24-04-3A&3B	UA	3-24-04-3-80	74.1442	1.09503	227.735	4.01789	795.932	545.333	227.735	4.01789	NA	Spencer et al. (2011)
3-24-04-3A&3B	UA	3-24-04-3-78	642.455	1.46107	228.151	3.00418	235.792	55.997	228.151	3.00418	NA	Spencer et al. (2011)
3-24-04-3A&3B	UA	3-24-04-3-15	117.697	1.42977	228.43	7.92618	656.019	249.069	228.43	7.92618	NA	Spencer et al. (2011)
3-24-04-3A&3B	UA	3-24-04-3-46	93.9359	0.507748	228.544	3.24183	64.438	529.872	228.544	3.24183	NA	Spencer et al. (2011)
3-24-04-3A&3B	UA	3-24-04-3-86	39.6403	0.84349	228.875	5.68721	980.527	561.78	228.875	5.68721	NA	Spencer et al. (2011)
3-24-04-3A&3B	UA	3-24-04-3-69	62.3631	0.660453	228.94	16.7433	652.452	645.289	228.94	16.7433	NA	Spencer et al. (2011)
3-24-04-3A&3B	UA	3-24-04-3--6	52.0902	0.479197	229.028	14.8002	881.933	644.919	229.028	14.8002	NA	Spencer et al. (2011)
3-24-04-3A&3B	UA	3-24-04-3-66	144.489	1.1046	229.328	3.65395	350.604	333.495	229.328	3.65395	NA	Spencer et al. (2011)
3-24-04-3A&3B	UA	3-24-04-3-90	225.719	0.892379	229.46	8.77015	239.399	181.279	229.46	8.77015	NA	Spencer et al. (2011)
3-24-04-3A&3B	UA	3-24-04-3-52	75.3394	0.536716	229.584	17.9254	84.1274	741.234	229.584	17.9254	NA	Spencer et al. (2011)
3-24-04-3A&3B	UA	3-24-04-3-37	99.9402	0.644234	230.837	3.34169	356.206	334.038	230.837	3.34169	NA	Spencer et al. (2011)
3-24-04-3A&3B	UA	3-24-04-3-61	75.567	0.628875	230.879	7.28409	-118.571	663.355	230.879	7.28409	NA	Spencer et al. (2011)
3-24-04-3A&3B	UA	3-24-04-3-26	82.6527	0.586511	231.058	3.07797	675.621	454.37	231.058	3.07797	NA	Spencer et al. (2011)
3-24-04-3A&3B	UA	3-24-04-3-30	129.308	0.608197	231.269	2.80039	308.504	314.814	231.269	2.80039	NA	Spencer et al. (2011)
3-24-04-3A&3B	UA	3-24-04-3-43	370.137	0.612337	231.612	3.09537	338.204	161.603	231.612	3.09537	NA	Spencer et al. (2011)
3-24-04-3A&3B	UA	3-24-04-3-95	55.2773	0.898426	233.897	3.20898	529.215	1045.15	233.897	3.20898	NA	Spencer et al. (2011)
3-24-04-3A&3B	UA	3-24-04-3-87	48.3196	0.987089	237.39	7.89127	661.381	448.532	237.39	7.89127	NA	Spencer et al. (2011)
3-24-04-3A&3B	UA	3-24-04-3-76	58.934	0.569313	241.203	39.376	722.622	270.948	241.203	39.376	NA	Spencer et al. (2011)
3-24-04-3A&3B	UA	3-24-04-3-41	274.978	0.597671	248.053	3.26193	280.01	165.251	248.053	3.26193	NA	Spencer et al. (2011)
3-24-04-3A&3B	UA	3-24-04-3-50	83.1365	0.639459	266.72	4.56342	188.034	318.368	266.72	4.56342	NA	Spencer et al. (2011)
3-24-04-3A&3B	UA	3-24-04-3-64	24.046	1.3436	416.485	11.7844	1263.48	326.528	416.485	11.7844	NA	Spencer et al. (2011)
3-24-04-3A&3B	UA	3-24-04-3-100	188.853	0.310141	580.014	10.9277	533.957	44.7308	580.014	10.9277	NA	Spencer et al. (2011)
3-24-04-3A&3B	UA	3-24-04-3-60	22.0398	1.71263	622.346	23.9959	534.839	284.663	622.346	23.9959	NA	Spencer et al. (2011)
3-24-04-3A&3B	UA	3-24-04-3-1	57.0843	0.767129	622.487	15.261	634.617	153.579	622.487	15.261	NA	Spencer et al. (2011)
3-24-04-3A&3B	UA	3-24-04-3-62	266.854	0.899739	1008.78	8.68493	1210.78	26.6517	1008.78	8.68493	83.3166	Spencer et al. (2011)
3-24-04-3A&3B	UA	3-24-04-3-75	39.6545	0.779	1089.47	14.5379	1357.84	262.725	1089.47	14.5379	80.2354	Spencer et al. (2011)
3-24-04-3A&3B	UA	3-24-04-3-53	95.7286	0.607918	1091.73	43.3873	1114.09	61.3289	1091.73	43.3873	97.9935	Spencer et al. (2011)
3-24-04-3A&3B	UA	3-24-04-3-56	34.39	0.931894	1106.19	24.245	1308.41	82.8586	1106.19	24.245	84.5448	Spencer et al. (2011)
3-24-04-3A&3B	UA	3-24-04-3-97	35.8129	0.591195	1115.09	36.8656	1303.14	76.3346	1115.09	36.8656	85.5697	Spencer et al. (2011)
3-24-04-3A&3B	UA	3-24-04-3-25	24.3732	0.981412	1124.59	26.1861	1256.51	98.8571	1124.59	26.1861	89.5013	Spencer et al. (2011)
3-24-04-3A&3B	UA	3-24-04-3-42	31.7862	0.828969	1137.65	11.7006	1194.77	144.863	1137.65	11.7006	95.2194	Spencer et al. (2011)
3-24-04-3A&3B	UA	3-24-04-3-70	24.3021	0.959291	1140.77	20.5166	1039.52	194.674	1140.77	20.5166	109.74	Spencer et al. (2011)
3-24-04-3A&3B	UA	3-24-04-3-92	10.4294	0.773755	1155.57	27.9709	1170.03	448.69	1155.57	27.9709	98.7635	Spencer et al. (2011)
3-24-04-3A&3B	UA	3-24-04-3-83	14.1003	0.853342	1159.86	27.6442	1250.77	166.624	1159.86	27.6442	92.7318	Spencer et al. (2011)
3-24-04-3A&3B	UA	3-24-04-3-44	79.3944	1.40514	1161.34	19.3474	1606.49	63.9649	1161.34	19.3474	72.2905	Spencer et al. (2011)
3-24-04-3A&3B	UA	3-24-04-3-34	20.6027	1.13294	1162.51	20.779	1265.47	164.216	1162.51	20.779	91.8644	Spencer et al. (2011)
3-24-04-3A&3B	UA	3-24-04-3-23	39.5265	0.986418	1176.57	20.3309	1190.37	113.355	1176.57	20.3309	98.8409	Spencer et al. (2011)
3-24-04-3A&3B	UA	3-24-04-3-59	39.2704	0.952341	1328.13	13.4524	1350.2	76.8769	1350.2	76.8769	98.3654	Spencer et al. (2011)
3-24-04-3A&3B	UA	3-24-04-3-82	22.3101	0.211322	1409.62	32.4225	1419.48	74.0711	1419.48	74.0711	99.3054	Spencer et al. (2011)
3-24-04-3A&3B	UA	3-24-04-3-74	41.2054	0.483642	1416.49	15.2683	1421.65	62.5489	1421.65	62.5489	99.6367	Spencer et al. (2011)
3-24-04-3A&3B	UA	3-24-04-3-93	44.4353	0.617728	1364.82	24.2445	1422.74	88.9041	1422.74	88.9041	95.9289	Spencer et al. (2011)
3-24-04-3A&3B	UA	3-24-04-3-20	67.7698	0.57447	1335.62	12.4309	1432.6	44.8199	1432.6	44.8199	93.2305	Spencer et al. (2011)
3-24-04-3A&3B	UA	3-24-04-3-88	133.263	0.475545	1359.36	19.9778	1447.56	27.8817	1447.56	27.8817	93.9069	Spencer et al. (2011)
3-24-04-3A&3B	UA	3-24-04-3-45	83.6203	1.1131	1392.8	19.9182	1453.73	58.3527	1453.73	58.3527	95.8083	Spencer et al. (2011)
3-24-04-3A&3B	UA	3-24-04-3-65	29.4528	0.984012	1661.61	20.3668	1592.94	92.522	1592.94	92.522	104.31	Spencer et al. (2011)
3-24-04-3A&3B	UA	3-24-04-3-67	101.335	0.545173	1533.53	76.2945	1648.28	32.149	1648.28	32.149	93.0386	Spencer et al. (2011)
3-24-04-3A&3B	UA	3-24-04-3-91	152.272	0.617146	1573.29	25.6871	1652.81	27.2682	1652.81	27.2682	95.1889	Spencer et al. (2011)
3-24-04-3A&3B	UA	3-24-04-3-19	90.7345	0.643929	1619.42	10.028	1664.59	27.9288	1664.59	27.9288	97.2864	Spencer et al. (2011)
3-24-04-3A&3B	UA	3-24-04-3-13	49.8705	1.32874	1643.34	12.4817	1667.43	31.944	1667.43	31.944	98.5553	Spencer et al. (2011)
3-24-04-3A&3B	UA	3-24-04-3-32	50.6673	0.819187	1588.75	19.7181	1669.55	67.8707	1669.55	67.8707	95.1604	Spencer et al. (2011)
3-24-04-3A&3B	UA	3-24-04-3-77	25.3977	2.33236	1683.89	27.4315	1675.65	162.124	1675.65	162.124	100.492	Spencer et al. (2011)
3-24-04-3A&3B	UA	3-24-04-3-54	105.077	0.865987	1697.51	29.8486	1715.79	20.4743	1715.79	20.4743	98.9345	Spencer et al. (2011)
3-24-04-3A&3B	UA	3-24-04-3--7	68.8654	0.355747	1633.22	23.2305	1725.53	32.4943	1725.53	32.4943	94.6502	Spencer et al. (2011)
3-24-04-3A&3B	UA	3-24-04-3-17	63.4017	0.909669	1719.93	55.7076	1739.49	44.6275	1739.49	44.6275	98.8755	Spencer et al. (2011)
3-24-04-3A&3B	UA	3-24-04-3-4	71.7823	1.64682	1621.2	10.3239	1740.42	32.0153	1740.42	32.0153	93.1501	Spencer et al. (2011)
3-24-04-3A&3B	UA	3-24-04-3-11	58.3222	0.819782	1675.12	14.6092	1749.45	39.9251	1749.45	39.9251	95.7514	Spencer et al. (2011)
3-24-04-3A&3B	UA	3-24-04-3-73	11.1693	0.730269	1740.03	53.8498	1757.96	70.9656	1757.96	70.9656	98.98	Spencer et al. (2011)
3-24-04-3A&3B	UA	3-24-04-3-29	23.3488	0.353053	1776.62	10.897	1833.01	61.8528	1833.01	61.8528	96.924	Spencer et al. (2011)
3-24-04-3A&3B	UA	3-24-04-3-18	261.034	0.213855	1797.95	20.2402	1880.37	17.1332	1880.37	17.1332	95.6164	Spencer et al. (2011)
3-24-04-3A&3B	UA	3-24-04-3-16	34.5892	3.18849	1947.82	33.1218	1962.2	26.2164	1962.2	26.2164	99.2669	Spencer et al. (2011)
3-24-04-3A&3B	UA	3-24-04-3-96	95.5152	0.248919	1931.06	47.7256	2051.61	25.3306	2051.61	25.3306	94.1239	Spencer et al. (2011)
3-25-04-4	UA	3-25-04-4-71	102.526	0.803596	180.556	2.87807	527.351	269.265	180.556	2.87807	NA	Spencer et al. (2011)
3-25-04-4	UA	3-25-04-4-30	184.522	0.431011	184.804	3.00849	277.351	142.899	184.804	3.00849	NA	Spencer et al. (2011)
3-25-04-4	UA	3-25-04-4-3	225.581	0.312401	188.989	3.504	244.904	187.69	188.989	3.504	NA	Spencer et al. (2011)
3-25-04-4	UA	3-25-04-4-43	115.213	0.818265	190.007	2.08188	216.696	462.986	190.007	2.08188	NA	Spencer et al. (2011)
3-25-04-4	UA	3-25-04-4-27	45.4441	0.680489	190.624	5.85144	-28.681	417.765	190.624	5.85144	NA	Spencer et al. (2011)
3-25-04-4	UA	3-25-04-4-45	120.722	0.389658	190.944	3.16515	215.957	199.244	190.944	3.16515	NA	Spencer et al. (2011)
3-25-04-4	UA	3-25-04-4-44	73.2447	0.674865	195.519	2.90149	56.9587	762.155	195.519	2.90149	NA	Spencer et al. (2011)
3-25-04-4	UA	3-25-04-4-61	78.5668	0.831193	196.588	3.20131	100.024	547.544	196.588	3.20131	NA	Spencer et al. (2011)
3-25-04-4	UA	3-25-04-4-48	88.527	0.456031	198.766	3.70291	363.274	305.546	198.766	3.70291	NA	Spencer et al. (2011)
3-25-04-4	UA	3-25-04-4-1	103.06	0.858033	199.742	6.40049	289.797	301.809	199.742	6.40049	NA	Spencer et al. (2011)
3-25-04-4	UA	3-25-04-4-57	233.067	0.39618	206.579	2.54378	209.579	128.265	206.579	2.54378	NA	Spencer et al. (2011)
3-25-04-4	UA	3-25-04-4-64	225.806	0.783943	212.195	2.15085	274.214	131.996	212.195	2.15085	NA	Spencer et al. (2011)
3-25-04-4	UA	3-25-04-4-66	210.795	0.726312	214.171	4.25651	319.375	74.1169	214.171	4.25651	NA	Spencer et al. (2011)
3-25-04-4	UA	3-25-04-4-91	151.708	0.392778	214.542	7.87213	326.192	137.302	214.542	7.87213	NA	Spencer et al. (2011)
3-25-04-4	UA	3-25-04-4-46	224.728	0.527937	215.753	2.3696	-20.1974	167.682	215.753	2.3696	NA	Spencer et al. (2011)
3-25-04-4	UA	3-25-04-4-7	134.664	0.547056	217.258	4.12607	146.507	130.49	217.258	4.12607	NA	Spencer et al. (2011)
3-25-04-4	UA	3-25-04-4-31	52.3591	0.740199	219.014	3.28256	-181.773	513.303	219.014	3.28256	NA	Spencer et al. (2011)
3-25-04-4	UA	3-25-04-4-77	206.447	0.858469	219.022	2.80266	259.623	130.619	219.022	2.80266	NA	Spencer et al. (2011)
3-25-04-4	UA	3-25-04-4-34	129.174	0.587687	219.082	2.03062	127.555	145.809	219.082	2.03062	NA	Spencer et al. (2011)
3-25-04-4	UA	3-25-04-4-2	189.497	0.776158	219.422	2.78453	203.315	214.755	219.422	2.78453	NA	Spencer et al. (2011)
3-25-04-4	UA	3-25-04-4-70	229.066	0.877401	221.105	2.76187	306.993	120.724	221.105	2.76187	NA	Spencer et al. (2011)
3-25-04-4	UA	3-25-04-4-10	187.623	0.717723	221.312	3.26447	291.188	164.77	221.312	3.26447	NA	Spencer et al. (2011)
3-25-04-4	UA	3-25-04-4-26	182.648	0.625786	222.072	1.84433	255.59	132.99	222.072	1.84433	NA	Spencer et al. (2011)
3-25-04-4	UA	3-25-04-4-6	86.7186	0.883968	227.235	1.57624	141.773	291.969	227.235	1.57624	NA	Spencer et al. (2011)
3-25-04-4	UA	3-25-04-4-93	132.978	0.853094	229.16	3.94404	168.36	236.514	229.16	3.94404	NA	Spencer et al. (2011)
3-25-04-4	UA	3-25-04-4-21	164.911	1.34359	229.218	4.16792	154.664	125.495	229.218	4.16792	NA	Spencer et al. (2011)
3-25-04-4	UA	3-25-04-4-19	114.632	0.493898	229.961	3.75461	320.779	226.911	229.961	3.75461	NA	Spencer et al. (2011)
3-25-04-4	UA	3-25-04-4-69	90.7383	0.659011	232.105	2.0688	244.22	264.996	232.105	2.0688	NA	Spencer et al. (2011)
3-25-04-4	UA	3-25-04-4-35	185.374	0.901961	232.116	5.73545	303.028	123.981	232.116	5.73545	NA	Spencer et al. (2011)
3-25-04-4	UA	3-25-04-4-29	972.326	0.91864	233.177	4.94664	232.191	35.191	233.177	4.94664	NA	Spencer et al. (2011)
3-25-04-4	UA	3-25-04-4-8	209.09	0.503398	238.237	5.52056	208.24	164.083	238.237	5.52056	NA	Spencer et al. (2011)
3-25-04-4	UA	3-25-04-4-36	657.272	1.20407	265.781	1.82311	236.228	48.3402	265.781	1.82311	NA	Spencer et al. (2011)
3-25-04-4	UA	3-25-04-4-86	172.257	0.817467	453.939	3.37748	505.217	43.625	453.939	3.37748	NA	Spencer et al. (2011)
3-25-04-4	UA	3-25-04-4-55	111.361	0.449383	488.483	23.9928	1116.2	65.257	488.483	23.9928	NA	Spencer et al. (2011)
3-25-04-4	UA	3-25-04-4-95	88.8081	0.778072	602.83	43.2211	1166.98	41.9665	602.83	43.2211	NA	Spencer et al. (2011)
3-25-04-4	UA	3-25-04-4-72	137.344	0.991872	603.258	14.6861	572.625	77.6734	603.258	14.6861	NA	Spencer et al. (2011)
3-25-04-4	UA	3-25-04-4-99	39.4661	0.865398	1023.74	15.0564	1044.09	101.619	1023.74	15.0564	98.0506	Spencer et al. (2011)
3-25-04-4	UA	3-25-04-4-9	120.881	0.427485	1028.97	14.1755	1097.05	31.6018	1028.97	14.1755	93.7949	Spencer et al. (2011)
3-25-04-4	UA	3-25-04-4-97	24.1463	1.18239	1044.42	8.4106	1098.74	136.526	1044.42	8.4106	95.0556	Spencer et al. (2011)
3-25-04-4	UA	3-25-04-4-78	92.5842	0.652326	1060.99	14.48	1087.71	41.7463	1060.99	14.48	97.5434	Spencer et al. (2011)
3-25-04-4	UA	3-25-04-4-14	100.755	0.892729	1069.6	21.0875	1319.07	201.758	1069.6	21.0875	81.0868	Spencer et al. (2011)
3-25-04-4	UA	3-25-04-4-65	704.14	0.0538708	1070.41	6.90388	1115.67	13.9808	1070.41	6.90388	95.943	Spencer et al. (2011)
3-25-04-4	UA	3-25-04-4-79	39.2506	0.520856	990.712	24.7083	1081.19	111.851	1081.19	111.851	91.6317	Spencer et al. (2011)
3-25-04-4	UA	3-25-04-4-16	97.2129	0.314786	1081.31	21.5031	1057.33	35.4187	1081.31	21.5031	102.268	Spencer et al. (2011)
3-25-04-4	UA	3-25-04-4-92	40.8154	0.695149	1101.81	19.1493	1118.92	105.234	1101.81	19.1493	98.4711	Spencer et al. (2011)
3-25-04-4	UA	3-25-04-4-15	398.24	0.315515	962.884	34.5301	1112.17	31.3719	1112.17	31.3719	86.5772	Spencer et al. (2011)
3-25-04-4	UA	3-25-04-4-23	161.144	0.482917	1113.48	13.6011	1162.73	24.2372	1113.48	13.6011	95.7637	Spencer et al. (2011)
3-25-04-4	UA	3-25-04-4-54	78.2013	1.00379	1113.9	7.16693	1165.77	56.8067	1113.9	7.16693	95.5503	Spencer et al. (2011)
3-25-04-4	UA	3-25-04-4-62	102.704	0.4478	1116.24	15.0677	1124.99	55.3513	1116.24	15.0677	99.2225	Spencer et al. (2011)
3-25-04-4	UA	3-25-04-4-25	31.8015	0.704301	1119.31	21.2309	1156.1	72.523	1119.31	21.2309	96.8184	Spencer et al. (2011)
3-25-04-4	UA	3-25-04-4-59	24.671	0.863352	1134.77	13.6649	1084.3	105.005	1134.77	13.6649	104.655	Spencer et al. (2011)
3-25-04-4	UA	3-25-04-4-80	84.3949	0.265968	1152.04	32.1035	1266.12	55.5138	1152.04	32.1035	90.9898	Spencer et al. (2011)
3-25-04-4	UA	3-25-04-4-56	19.8361	0.579633	1176.81	13.0279	1217.49	89.0142	1176.81	13.0279	96.6588	Spencer et al. (2011)
3-25-04-4	UA	3-25-04-4-50	93.8397	0.440193	1406.02	11.8757	1409.01	35.8734	1409.01	35.8734	99.7877	Spencer et al. (2011)
3-25-04-4	UA	3-25-04-4-4	36.121	0.279862	1320.52	29.3764	1413.23	64.7477	1413.23	64.7477	93.4401	Spencer et al. (2011)
3-25-04-4	UA	3-25-04-4-5	94.7111	0.329239	1403.6	16.1452	1417.17	14.6258	1417.17	14.6258	99.0425	Spencer et al. (2011)
3-25-04-4	UA	3-25-04-4-88	63.781	0.440542	1381.5	8.70786	1425.32	27.9207	1425.32	27.9207	96.9259	Spencer et al. (2011)
3-25-04-4	UA	3-25-04-4-42	113.292	0.329834	1349.24	12.2965	1426.43	13.5073	1426.43	13.5073	94.5887	Spencer et al. (2011)
3-25-04-4	UA	3-25-04-4-53	94.074	0.407169	1404.56	12.875	1426.49	25.389	1426.49	25.389	98.463	Spencer et al. (2011)
3-25-04-4	UA	3-25-04-4-13	103.247	1.01836	1376.17	9.04708	1427.7	25.2762	1427.7	25.2762	96.3905	Spencer et al. (2011)
3-25-04-4	UA	3-25-04-4-20	91.2536	1.19308	1430.81	37.9821	1429.35	17.9883	1429.35	17.9883	100.102	Spencer et al. (2011)
3-25-04-4	UA	3-25-04-4-40	347.558	0.419277	1255.67	14.6042	1437.92	13.3689	1437.92	13.3689	87.325	Spencer et al. (2011)
3-25-04-4	UA	3-25-04-4-33	448.135	0.311592	1221.98	88.2786	1438.23	15.8977	1438.23	15.8977	84.9639	Spencer et al. (2011)
3-25-04-4	UA	3-25-04-4-58	52.3591	1.07607	1402.23	13.9185	1441.43	56.2452	1441.43	56.2452	97.2807	Spencer et al. (2011)
3-25-04-4	UA	3-25-04-4-60	196.094	0.288309	1367.6	24.8921	1443.52	13.3771	1443.52	13.3771	94.7407	Spencer et al. (2011)
3-25-04-4	UA	3-25-04-4-75	224.522	0.56762	1409.34	42.9155	1459.91	15.0876	1459.91	15.0876	96.5364	Spencer et al. (2011)
3-25-04-4	UA	3-25-04-4-81	80.1409	0.665354	1505.27	13.8393	1570.25	25.9283	1570.25	25.9283	95.8617	Spencer et al. (2011)
3-25-04-4	UA	3-25-04-4-39	80.9374	0.497397	1539.8	28.3538	1613.49	19.3151	1613.49	19.3151	95.4326	Spencer et al. (2011)
3-25-04-4	UA	3-25-04-4-37	41.1527	0.821691	1635.54	10.1246	1628	44.7993	1628	44.7993	100.463	Spencer et al. (2011)
3-25-04-4	UA	3-25-04-4-24	216.67	0.244533	1584.7	83.6037	1638.83	37.9967	1638.83	37.9967	96.697	Spencer et al. (2011)
3-25-04-4	UA	3-25-04-4-28	50.101	1.15776	1635.2	27.7325	1644.51	35.4531	1644.51	35.4531	99.4335	Spencer et al. (2011)
3-25-04-4	UA	3-25-04-4-49	280.095	0.0942632	1330.68	8.53655	1649.31	12.9868	1649.31	12.9868	80.6808	Spencer et al. (2011)
3-25-04-4	UA	3-25-04-4-47	1301.98	0.288766	1513.86	10.3892	1650.32	12.9772	1650.32	12.9772	91.7315	Spencer et al. (2011)
3-25-04-4	UA	3-25-04-4-22	36.0648	0.568208	1625	19.8706	1658.38	87.5319	1658.38	87.5319	97.9872	Spencer et al. (2011)
3-25-04-4	UA	3-25-04-4-52	142.273	0.515758	1594.46	30.9358	1665.46	28.7014	1665.46	28.7014	95.737	Spencer et al. (2011)
3-25-04-4	UA	3-25-04-4-17	261.796	0.27375	1505.92	51.8394	1671.2	12.9605	1671.2	12.9605	90.1102	Spencer et al. (2011)
3-25-04-4	UA	3-25-04-4-18	78.7542	0.4874	1584.05	35.5333	1671.28	16.6436	1671.28	16.6436	94.7806	Spencer et al. (2011)
3-25-04-4	UA	3-25-04-4-82	144.522	0.489631	1586.61	30.5201	1672.91	20.3584	1672.91	20.3584	94.8415	Spencer et al. (2011)
3-25-04-4	UA	3-25-04-4-90	90.8788	0.88988	1611.77	24.9575	1684.47	18.0847	1684.47	18.0847	95.6841	Spencer et al. (2011)
3-25-04-4	UA	3-25-04-4-100	253.278	0.788554	1572.28	23.8585	1684.68	12.934	1684.68	12.934	93.3283	Spencer et al. (2011)
3-25-04-4	UA	3-25-04-4-51	219.537	0.286062	1562.65	23.1747	1685.02	13.0385	1685.02	13.0385	92.7379	Spencer et al. (2011)
3-25-04-4	UA	3-25-04-4-74	135.105	0.627984	1448.05	29.8299	1686.2	24.5868	1686.2	24.5868	85.8764	Spencer et al. (2011)
3-25-04-4	UA	3-25-04-4-11	103.575	0.368728	1625.62	29.7434	1688.39	16.8879	1688.39	16.8879	96.2824	Spencer et al. (2011)
3-25-04-4	UA	3-25-04-4-68	55.6479	0.528144	1585.17	14.1963	1689.72	27.8298	1689.72	27.8298	93.8125	Spencer et al. (2011)
3-25-04-4	UA	3-25-04-4-32	43.9449	0.629107	1685.22	13.0534	1689.81	68.3445	1689.81	68.3445	99.7281	Spencer et al. (2011)
3-25-04-4	UA	3-25-04-4-38	60.614	0.577052	1273.45	61.3634	1693.83	61.8216	1693.83	61.8216	75.1816	Spencer et al. (2011)
3-25-04-4	UA	3-25-04-4-84	86.4375	1.25712	1395.26	19.5726	1695.63	23.516	1695.63	23.516	82.2858	Spencer et al. (2011)
3-25-04-4	UA	3-25-04-4-12	122.146	0.579192	1681.52	20.722	1701.89	12.9835	1701.89	12.9835	98.8034	Spencer et al. (2011)
3-25-04-4	UA	3-25-04-4-67	110.378	0.578183	1557.05	11.7587	1714.54	24.8707	1714.54	24.8707	90.8142	Spencer et al. (2011)
3-25-04-4	UA	3-25-04-4-76	120.085	0.616568	1653.2	13.4175	1731.2	17.0322	1731.2	17.0322	95.4946	Spencer et al. (2011)
3-25-04-4	UA	3-25-04-4-98	49.7449	0.389874	1722.65	53.8176	1736.14	31.0811	1736.14	31.0811	99.223	Spencer et al. (2011)
3-25-04-4	UA	3-25-04-4-87	55.573	0.835127	1604.59	9.94644	1741.49	31.6306	1741.49	31.6306	92.1393	Spencer et al. (2011)
3-25-04-4	UA	3-25-04-4-94	254.328	0.677994	1616.84	11.8696	1745.37	12.8698	1745.37	12.8698	92.6358	Spencer et al. (2011)
3-25-04-4	UA	3-25-04-4-63	114.875	0.544863	1591.71	24.8243	1747.81	12.9878	1747.81	12.9878	91.0687	Spencer et al. (2011)
3-25-04-4	UA	3-25-04-4-89	163.224	0.405729	1780.72	39.5218	1853.75	12.7635	1853.75	12.7635	96.0606	Spencer et al. (2011)
3-25-04-4	UA	3-25-04-4-83	82.1742	0.555153	1711.75	24.5051	1863.1	19.2095	1863.1	19.2095	91.876	Spencer et al. (2011)
3-25-04-4	UA	3-25-04-4-41	92.7341	0.729633	1880.35	21.5294	1891.9	12.7029	1891.9	12.7029	99.3896	Spencer et al. (2011)
3-25-04-7&8	UA	3-25-04-78-96	184.753	0.965267	145.082	4.14551	373.013	387.876	145.082	4.14551	NA	Spencer et al. (2011)
3-25-04-7&8	UA	3-25-04-78-16	72.0439	0.839757	152.237	7.06651	856.591	451.392	152.237	7.06651	NA	Spencer et al. (2011)
3-25-04-7&8	UA	3-25-04-78-92	328.942	1.28761	157.47	4.08038	172.134	168.741	157.47	4.08038	NA	Spencer et al. (2011)
3-25-04-7&8	UA	3-25-04-78-79	202.823	0.469896	159.216	3.8552	492.979	283.366	159.216	3.8552	NA	Spencer et al. (2011)
3-25-04-7&8	UA	3-25-04-78-47	174.204	1.00237	159.326	2.21745	574.877	339.534	159.326	2.21745	NA	Spencer et al. (2011)
3-25-04-7&8	UA	3-25-04-78-6	140.302	1.25613	160.288	2.78095	493.072	549.403	160.288	2.78095	NA	Spencer et al. (2011)
3-25-04-7&8	UA	3-25-04-78-4	222.34	0.977515	160.854	3.30746	324.785	328.046	160.854	3.30746	NA	Spencer et al. (2011)
3-25-04-7&8	UA	3-25-04-78-94	159.398	1.13664	162.033	3.82099	831.499	272.658	162.033	3.82099	NA	Spencer et al. (2011)
3-25-04-7&8	UA	3-25-04-78-88	254.509	1.05096	162.268	2.5547	216.261	201.539	162.268	2.5547	NA	Spencer et al. (2011)
3-25-04-7&8	UA	3-25-04-78-85	221.785	0.75402	162.919	1.57252	136.354	367.292	162.919	1.57252	NA	Spencer et al. (2011)
3-25-04-7&8	UA	3-25-04-78-36	129.736	1.29637	163.49	2.29705	74.6464	785.645	163.49	2.29705	NA	Spencer et al. (2011)
3-25-04-7&8	UA	3-25-04-78-8	120.483	1.65661	163.855	3.95688	9.69597	1180.86	163.855	3.95688	NA	Spencer et al. (2011)
3-25-04-7&8	UA	3-25-04-78-67	147.2	0.797633	164.257	3.93404	-105.514	316.787	164.257	3.93404	NA	Spencer et al. (2011)
3-25-04-7&8	UA	3-25-04-78-23	242.698	1.48002	164.466	4.36398	221.775	380.999	164.466	4.36398	NA	Spencer et al. (2011)
3-25-04-7&8	UA	3-25-04-78-14	229.692	1.53559	164.703	1.70035	249.157	233.845	164.703	1.70035	NA	Spencer et al. (2011)
3-25-04-7&8	UA	3-25-04-78-39	96.2548	1.03155	165.057	6.37665	499.86	933.189	165.057	6.37665	NA	Spencer et al. (2011)
3-25-04-7&8	UA	3-25-04-78-27	151.928	1.17627	165.142	3.97022	389.798	538.854	165.142	3.97022	NA	Spencer et al. (2011)
3-25-04-7&8	UA	3-25-04-78-37	124.504	1.16562	165.217	4.23422	313.612	421.245	165.217	4.23422	NA	Spencer et al. (2011)
3-25-04-7&8	UA	3-25-04-78-12	337.354	0.633697	165.472	1.55574	335.835	203.492	165.472	1.55574	NA	Spencer et al. (2011)
3-25-04-7&8	UA	3-25-04-78-84	132.277	1.07844	165.783	3.78769	290.627	488.398	165.783	3.78769	NA	Spencer et al. (2011)
3-25-04-7&8	UA	3-25-04-78-18	193.351	1.33419	166.493	2.1579	-62.0878	535.977	166.493	2.1579	NA	Spencer et al. (2011)
3-25-04-7&8	UA	3-25-04-78-7	119.49	0.951701	167.006	3.01599	10.1216	722.443	167.006	3.01599	NA	Spencer et al. (2011)
3-25-04-7&8	UA	3-25-04-78-1	107.326	0.820422	167.06	5.38356	246.336	788.66	167.06	5.38356	NA	Spencer et al. (2011)
3-25-04-7&8	UA	3-25-04-78-99	100.461	1.01666	167.377	3.31761	-47.9171	814.216	167.377	3.31761	NA	Spencer et al. (2011)
3-25-04-7&8	UA	3-25-04-78-60	125.025	0.880238	167.453	4.5857	419.065	634.121	167.453	4.5857	NA	Spencer et al. (2011)
3-25-04-7&8	UA	3-25-04-78-32	126.539	0.765979	167.538	3.09124	349.17	715.106	167.538	3.09124	NA	Spencer et al. (2011)
3-25-04-7&8	UA	3-25-04-78-59	206.642	0.858519	167.626	2.35145	217.455	148.515	167.626	2.35145	NA	Spencer et al. (2011)
3-25-04-7&8	UA	3-25-04-78-11	143.146	0.743383	167.665	1.864	52.6642	485.378	167.665	1.864	NA	Spencer et al. (2011)
3-25-04-7&8	UA	3-25-04-78-87	91.4261	0.986347	167.694	7.13218	496.169	366.608	167.694	7.13218	NA	Spencer et al. (2011)
3-25-04-7&8	UA	3-25-04-78-93	174.154	0.809663	167.826	3.15743	-8.93699	827.277	167.826	3.15743	NA	Spencer et al. (2011)
3-25-04-7&8	UA	3-25-04-78-2	72.6496	1.16666	168.222	4.83218	703.536	747.487	168.222	4.83218	NA	Spencer et al. (2011)
3-25-04-7&8	UA	3-25-04-78-71	97.7017	1.07963	168.77	5.6328	752.483	484.24	168.77	5.6328	NA	Spencer et al. (2011)
3-25-04-7&8	UA	3-25-04-78-66	121.021	1.00684	168.815	7.26997	685.787	756.924	168.815	7.26997	NA	Spencer et al. (2011)
3-25-04-7&8	UA	3-25-04-78-29	109.664	1.16998	168.969	3.92659	396.095	396.904	168.969	3.92659	NA	Spencer et al. (2011)
3-25-04-7&8	UA	3-25-04-78-28	109.21	1.28506	168.995	4.38315	-520.529	1332.75	168.995	4.38315	NA	Spencer et al. (2011)
3-25-04-7&8	UA	3-25-04-78-53	373.376	0.562811	169.095	2.87261	21.4245	239.596	169.095	2.87261	NA	Spencer et al. (2011)
3-25-04-7&8	UA	3-25-04-78-91	176.189	0.745868	169.142	2.98786	679.05	563.856	169.142	2.98786	NA	Spencer et al. (2011)
3-25-04-7&8	UA	3-25-04-78-43	92.2841	0.982358	169.602	2.48758	173.232	504.804	169.602	2.48758	NA	Spencer et al. (2011)
3-25-04-7&8	UA	3-25-04-78-17	127.313	0.780731	169.869	3.7462	579.077	648.804	169.869	3.7462	NA	Spencer et al. (2011)
3-25-04-7&8	UA	3-25-04-78-42	283.565	1.15512	169.894	2.65868	396.513	326.597	169.894	2.65868	NA	Spencer et al. (2011)
3-25-04-7&8	UA	3-25-04-78-9	130.241	1.06205	169.923	4.00258	435.128	294.762	169.923	4.00258	NA	Spencer et al. (2011)
3-25-04-7&8	UA	3-25-04-78-48	99.8553	0.961091	170.786	5.8363	418.769	499.253	170.786	5.8363	NA	Spencer et al. (2011)
3-25-04-7&8	UA	3-25-04-78-89	2233.81	0.860485	172.161	1.25717	191.255	39.1426	172.161	1.25717	NA	Spencer et al. (2011)
3-25-04-7&8	UA	3-25-04-78-100	286.443	0.987406	173.117	3.35117	-36.7713	263.893	173.117	3.35117	NA	Spencer et al. (2011)
3-25-04-7&8	UA	3-25-04-78-64	118.918	0.746479	173.749	4.11001	341.969	889.478	173.749	4.11001	NA	Spencer et al. (2011)
3-25-04-7&8	UA	3-25-04-78-54	172.101	0.825341	176.208	2.87148	554.845	337.94	176.208	2.87148	NA	Spencer et al. (2011)
3-25-04-7&8	UA	3-25-04-78-40	120.247	0.932451	176.449	2.55026	337.091	403	176.449	2.55026	NA	Spencer et al. (2011)
3-25-04-7&8	UA	3-25-04-78-44	364.358	0.601316	177.54	1.4252	347.918	155.939	177.54	1.4252	NA	Spencer et al. (2011)
3-25-04-7&8	UA	3-25-04-78-90	181.338	0.877806	184.354	2.8582	1.6753	445.981	184.354	2.8582	NA	Spencer et al. (2011)
3-25-04-7&8	UA	3-25-04-78-3	128.744	0.381386	190.395	3.24089	31.4077	550.199	190.395	3.24089	NA	Spencer et al. (2011)
3-25-04-7&8	UA	3-25-04-78-24	311.781	0.356388	197.453	3.87042	218.331	157.429	197.453	3.87042	NA	Spencer et al. (2011)
3-25-04-7&8	UA	3-25-04-78-72	473.366	0.64184	200.836	5.17607	373.893	214.923	200.836	5.17607	NA	Spencer et al. (2011)
3-25-04-7&8	UA	3-25-04-78-21	332.341	0.298044	203.653	3.02875	128.818	232.811	203.653	3.02875	NA	Spencer et al. (2011)
3-25-04-7&8	UA	3-25-04-78-86	260.297	0.656954	208.836	7.91872	277.148	229.913	208.836	7.91872	NA	Spencer et al. (2011)
3-25-04-7&8	UA	3-25-04-78-83	138.889	0.475004	214.911	3.04888	412.524	393.739	214.911	3.04888	NA	Spencer et al. (2011)
3-25-04-7&8	UA	3-25-04-78-75	141.816	0.502294	215.636	2.93518	415.705	404.284	215.636	2.93518	NA	Spencer et al. (2011)
3-25-04-7&8	UA	3-25-04-78-70	204.573	0.413276	217.53	6.67515	453.359	286.581	217.53	6.67515	NA	Spencer et al. (2011)
3-25-04-7&8	UA	3-25-04-78-35	195.908	1.07834	218.316	3.65154	415.956	157.771	218.316	3.65154	NA	Spencer et al. (2011)
3-25-04-7&8	UA	3-25-04-78-33	305.051	0.539407	218.592	3.28911	344.67	163.445	218.592	3.28911	NA	Spencer et al. (2011)
3-25-04-7&8	UA	3-25-04-78-61	306.767	0.634868	218.675	1.7475	56.5628	221.186	218.675	1.7475	NA	Spencer et al. (2011)
3-25-04-7&8	UA	3-25-04-78-20	164.059	0.735913	219.776	2.15186	673.594	241.157	219.776	2.15186	NA	Spencer et al. (2011)
3-25-04-7&8	UA	3-25-04-78-65	122.333	0.660263	219.983	5.15465	361.351	390.324	219.983	5.15465	NA	Spencer et al. (2011)
3-25-04-7&8	UA	3-25-04-78-51	202.823	0.852022	220.583	2.10786	302.678	322.156	220.583	2.10786	NA	Spencer et al. (2011)
3-25-04-7&8	UA	3-25-04-78-10	159.264	0.518003	221.912	6.81031	-355.789	396.218	221.912	6.81031	NA	Spencer et al. (2011)
3-25-04-7&8	UA	3-25-04-78-58	145.821	0.589444	222.078	2.44905	261.479	299.073	222.078	2.44905	NA	Spencer et al. (2011)
3-25-04-7&8	UA	3-25-04-78-76	423.245	0.922184	225.019	2.2564	183.765	122.544	225.019	2.2564	NA	Spencer et al. (2011)
3-25-04-7&8	UA	3-25-04-78-55	186.84	0.48663	226.584	2.65919	202.001	269.518	226.584	2.65919	NA	Spencer et al. (2011)
3-25-04-7&8	UA	3-25-04-78-68	161.888	0.384542	226.993	2.99919	50.4313	520.906	226.993	2.99919	NA	Spencer et al. (2011)
3-25-04-7&8	UA	3-25-04-78-57	331.499	0.462708	238.266	2.13058	213.275	110.314	238.266	2.13058	NA	Spencer et al. (2011)
3-25-04-7&8	UA	3-25-04-78-78	101.235	0.496568	639.31	16.6399	915.588	113.941	639.31	16.6399	NA	Spencer et al. (2011)
3-25-04-7&8	UA	3-25-04-78-62	699.929	0.930453	1077.97	7.84277	1079.64	18.4186	1077.97	7.84277	99.8452	Spencer et al. (2011)
3-25-04-7&8	UA	3-25-04-78-25	26.5327	0.235328	1125.51	15.7329	1196.44	247.993	1125.51	15.7329	94.071	Spencer et al. (2011)
3-25-04-7&8	UA	3-25-04-78-46	52.5103	0.609214	1128.27	8.40591	1132.4	93.8846	1128.27	8.40591	99.6356	Spencer et al. (2011)
3-25-04-7&8	UA	3-25-04-78-74	53.8562	0.644803	1135.16	14.7831	1253.09	136.848	1135.16	14.7831	90.5887	Spencer et al. (2011)
3-25-04-7&8	UA	3-25-04-78-95	210.68	0.648227	999.842	31.6765	1164.87	18.568	1164.87	18.568	85.8332	Spencer et al. (2011)
3-25-04-7&8	UA	3-25-04-78-22	132.781	0.439023	1395.16	19.0693	1400.56	27.3115	1400.56	27.3115	99.614	Spencer et al. (2011)
3-25-04-7&8	UA	3-25-04-78-80	95.2285	0.814432	1462.38	17.6654	1422.85	48.5146	1422.85	48.5146	102.778	Spencer et al. (2011)
3-25-04-7&8	UA	3-25-04-78-34	144.71	0.359135	1386.8	16.9712	1423.41	21.4447	1423.41	21.4447	97.4286	Spencer et al. (2011)
3-25-04-7&8	UA	3-25-04-78-41	145.03	0.692687	1444.26	20.3153	1425.04	26.3029	1425.04	26.3029	101.349	Spencer et al. (2011)
3-25-04-7&8	UA	3-25-04-78-69	78.3195	0.610647	1284.03	8.50273	1426.46	71.9311	1426.46	71.9311	90.0149	Spencer et al. (2011)
3-25-04-7&8	UA	3-25-04-78-50	30.0323	1.43942	1400.24	14.4881	1441.03	138.458	1441.03	138.458	97.1697	Spencer et al. (2011)
3-25-04-7&8	UA	3-25-04-78-56	39.6056	1.77442	1381.8	11.0784	1442.68	127.771	1442.68	127.771	95.78	Spencer et al. (2011)
3-25-04-7&8	UA	3-25-04-78-63	348.694	0.535976	1328.2	25.2075	1445.61	27.258	1445.61	27.258	91.878	Spencer et al. (2011)
3-25-04-7&8	UA	3-25-04-78-77	256.107	0.178545	1425.55	12.9182	1454.08	21.7952	1454.08	21.7952	98.038	Spencer et al. (2011)
3-25-04-7&8	UA	3-25-04-78-15	170.705	0.495582	1375.37	11.3959	1454.49	22.3884	1454.49	22.3884	94.5599	Spencer et al. (2011)
3-25-04-7&8	UA	3-25-04-78-73	539.622	0.293457	1479.34	9.25324	1636.27	13.0145	1636.27	13.0145	90.4094	Spencer et al. (2011)
3-25-04-7&8	UA	3-25-04-78-5	102.143	0.537152	1478.73	20.8792	1645.41	51.4633	1645.41	51.4633	89.8703	Spencer et al. (2011)
3-25-04-7&8	UA	3-25-04-78-26	65.2466	0.533052	1640.47	15.9407	1674.03	68.6378	1674.03	68.6378	97.9958	Spencer et al. (2011)
3-25-04-7&8	UA	3-25-04-78-98	250.336	0.541295	1375.55	35.5512	1685.44	19.6424	1685.44	19.6424	81.6136	Spencer et al. (2011)
3-25-04-7&8	UA	3-25-04-78-38	62.3359	0.600991	1623.09	16.934	1685.59	51.9609	1685.59	51.9609	96.2919	Spencer et al. (2011)
3-25-04-7&8	UA	3-25-04-78-49	259.153	0.546666	1634.34	14.2921	1689.32	14.6076	1689.32	14.6076	96.7453	Spencer et al. (2011)
3-25-04-7&8	UA	3-25-04-78-30	118.127	0.69457	1681.53	19.9826	1698.43	26.6285	1698.43	26.6285	99.0046	Spencer et al. (2011)
3-25-04-7&8	UA	3-25-04-78-31	198.869	0.490995	1643.01	14.7939	1723.85	20.9674	1723.85	20.9674	95.3106	Spencer et al. (2011)
3-25-04-7&8	UA	3-25-04-78-13	63.5305	0.667062	1680.48	14.2079	1727.53	47.2106	1727.53	47.2106	97.2762	Spencer et al. (2011)
3-25-04-7&8	UA	3-25-04-78-19	231.728	0.376082	1664.13	10.2681	1734.17	12.9496	1734.17	12.9496	95.9611	Spencer et al. (2011)
3-25-04-7&8	UA	3-25-04-78-45	185.208	0.479728	1675.22	10.3414	1742.03	20.91	1742.03	20.91	96.1644	Spencer et al. (2011)
3-25-04-7&8	UA	3-25-04-78-97	133.909	0.203576	2817	43.5903	2847.15	11.4092	2847.15	11.4092	98.9412	Spencer et al. (2011)

## Sheet: Big Bear
Sample	Lab	Analysis ID	ppm U	Th/U	6/8 Age	1s	7/6 Age	1s	Best Age	1s	Conc	Data Source
WQ1	Stanford	WQ971-11.1	44.6038	1.49888	1503.03	22.6189	1829.2	29.6522	1829.2	29.6522	82.1688	Barth et al. (2009)
WQ1	Stanford	WQ971-41.1	174.008	0.850642	1168.6	9.81017	1385.39	25.6362	1385.39	25.6362	84.3516	Barth et al. (2009)
WQ1	Stanford	WQ971-26.1	765.646	1.01633	1190.89	7.4095	1409.88	8.23455	1409.88	8.23455	84.4676	Barth et al. (2009)
WQ1	Stanford	WQ1_60.1	28.2325	1.06649	1279.05	25.1437	1468.37	147.536	1468.37	147.536	87.1064	Barth et al. (2009)
WQ1	Stanford	WQ971-30.1	55.0512	0.983848	834.614	11.8226	931.001	53.5615	834.614	11.8226	89.647	Barth et al. (2009)
WQ1	Stanford	WQ97_1_72.1	312.092	1.08088	1236.96	12.0619	1368.92	17.2367	1368.92	17.2367	90.3602	Barth et al. (2009)
WQ1	Stanford	WQ971-31.1	39.1478	0.281945	1119.23	17.3804	1233.77	43.0134	1233.77	43.0134	90.7163	Barth et al. (2009)
WQ1	Stanford	WQ971-22.1	1007.25	0.486725	1047.13	6.72185	1152.6	15.906	1152.6	15.906	90.8495	Barth et al. (2009)
WQ1	Stanford	WQ971-28.1	161.011	0.934064	1823.67	16.0822	1992.62	11.7067	1992.62	11.7067	91.5212	Barth et al. (2009)
WQ1	Stanford	WQ1_63.1	274.428	0.571277	1678.53	16.7102	1833.57	15.8823	1833.57	15.8823	91.5444	Barth et al. (2009)
WQ1	Stanford	WQ971-12.1	92.7602	1.48581	2377.12	31.1541	2591.04	12.1944	2591.04	12.1944	91.7439	Barth et al. (2009)
WQ1	Stanford	WQ971-36.1	240.376	0.809034	1116.59	8.66236	1209.94	19.8629	1209.94	19.8629	92.2852	Barth et al. (2009)
WQ1	Stanford	WQ971-21.1	85.6343	0.542917	1700.9	21.3915	1818.28	24.5664	1818.28	24.5664	93.5445	Barth et al. (2009)
WQ1	Stanford	WQ971-20.1	79.6014	0.375383	1206.59	14.4038	1288.33	49.3148	1288.33	49.3148	93.6548	Barth et al. (2009)
WQ1	Stanford	WQ971-18.1	152.496	0.606167	1404.73	13.0398	1488.85	19.3174	1488.85	19.3174	94.35	Barth et al. (2009)
WQ1	Stanford	WQ97_1_67.1	27.4135	0.389983	1225.1	24.9389	1282.25	58.0612	1282.25	58.0612	95.5426	Barth et al. (2009)
WQ1	Stanford	WQ971-32.1	317.682	0.721821	1381.78	9.998	1438.81	12.0944	1438.81	12.0944	96.0363	Barth et al. (2009)
WQ1	Stanford	WQ1_37.1	78.2185	0.647721	1799.52	26.8974	1868.87	25.8956	1868.87	25.8956	96.2889	Barth et al. (2009)
WQ1	Stanford	WQ971-29.1	133.812	0.478489	1385.76	12.9173	1437.67	19.1836	1437.67	19.1836	96.3892	Barth et al. (2009)
WQ1	Stanford	WQ971-33.1	171.165	0.463942	1408.9	12.0398	1461.44	15.24	1461.44	15.24	96.4056	Barth et al. (2009)
WQ1	Stanford	WQ971-37.1	18.3704	0.511966	1211.08	23.6136	1255.38	103.841	1255.38	103.841	96.471	Barth et al. (2009)
WQ1	Stanford	WQ971-10.1	112.575	1.04218	1745.07	17.1539	1807.98	17.2067	1807.98	17.2067	96.5208	Barth et al. (2009)
WQ1	Stanford	WQ971-24.1	64.9204	0.273694	1325.17	16.4282	1368.3	31.3964	1368.3	31.3964	96.8483	Barth et al. (2009)
WQ1	Stanford	WQ971-38.1	98.8671	0.917366	1571.9	16.8082	1617.26	23.8071	1617.26	23.8071	97.1954	Barth et al. (2009)
WQ1	Stanford	WQ1_55.1	139.415	0.393354	1400.82	15.1523	1435.7	21.2293	1435.7	21.2293	97.5706	Barth et al. (2009)
WQ1	Stanford	WQ97_1_65.1	115.945	0.977608	1386.92	17.0906	1421.26	27.1869	1421.26	27.1869	97.5839	Barth et al. (2009)
WQ1	Stanford	WQ971-5.1	121.512	1.59929	1153.43	11.321	1180.57	30.9034	1180.57	30.9034	97.701	Barth et al. (2009)
WQ1	Stanford	WQ971-17.1	277.627	0.0495808	1221.4	9.56543	1247.31	21.6018	1247.31	21.6018	97.9227	Barth et al. (2009)
WQ1	Stanford	WQ971-6.1	82.7214	0.969107	1804.99	19.8473	1842.99	26.0745	1842.99	26.0745	97.9381	Barth et al. (2009)
WQ1	Stanford	WQ971-23.1	217.985	0.531937	1412.2	11.4729	1435.57	15.0761	1435.57	15.0761	98.3718	Barth et al. (2009)
WQ1	Stanford	WQ97_1_69.1	200.795	0.378716	1837.38	19.6185	1861.74	17.5462	1861.74	17.5462	98.6916	Barth et al. (2009)
WQ1	Stanford	WQ971-8.1	729.987	0.480134	1214.65	7.58033	1226.07	10.87	1226.07	10.87	99.0689	Barth et al. (2009)
WQ1	Stanford	WQ971-39.1	68.1499	0.768	1734.28	19.9381	1747.44	23.8926	1747.44	23.8926	99.2471	Barth et al. (2009)
WQ1	Stanford	WQ971-2.1	444.785	0.890676	1221	8.37763	1230.09	13.0802	1230.09	13.0802	99.2606	Barth et al. (2009)
WQ1	Stanford	WQ971-34.1	46.2989	0.61308	1318.2	18.5619	1327.63	35.7853	1327.63	35.7853	99.29	Barth et al. (2009)
WQ1	Stanford	WQ971-35.1	169.003	0.594736	1485.36	12.6709	1495.59	14.6531	1495.59	14.6531	99.3158	Barth et al. (2009)
WQ1	Stanford	WQ1_36.1	70.1163	0.566309	1474.82	22.299	1483.84	28.5956	1483.84	28.5956	99.3916	Barth et al. (2009)
WQ1	Stanford	WQ971-7.1	125.72	0.481012	1219.67	11.8287	1219.96	48.8188	1219.96	48.8188	99.9763	Barth et al. (2009)
WQ1	Stanford	WQ971-4.1	84.5811	0.827013	1450.58	15.906	1449.98	25.7541	1449.98	25.7541	100.041	Barth et al. (2009)
WQ1	Stanford	WQ1_62.1	94.0019	0.601399	1495.97	18.6609	1492.57	27.849	1492.57	27.849	100.228	Barth et al. (2009)
WQ1	Stanford	WQ1_31.1	143.596	0.533318	1469.59	19.6504	1461.19	21.0569	1461.19	21.0569	100.575	Barth et al. (2009)
WQ1	Stanford	WQ1_56.1	79.76	0.772208	1424.06	18.1618	1414.91	28.0302	1414.91	28.0302	100.647	Barth et al. (2009)
WQ1	Stanford	WQ1_57.1	138.676	0.790453	1451.56	16.0769	1439.74	23.9132	1439.74	23.9132	100.821	Barth et al. (2009)
WQ1	Stanford	WQ971-40.1	263.216	0.0687754	1867.96	13.8643	1847.94	11.9486	1847.94	11.9486	101.084	Barth et al. (2009)
WQ1	Stanford	WQ1-42.1x	59.4708	0.798689	1343.16	20.7884	1327.14	76.8283	1327.14	76.8283	101.208	Barth et al. (2009)
WQ1	Stanford	WQ1_38.1	87.3536	0.855503	1426.45	20.4486	1405.38	25.4017	1405.38	25.4017	101.499	Barth et al. (2009)
WQ1	Stanford	WQ1-41.1	75.8297	0.800183	1487	22.2209	1462.4	28.7865	1462.4	28.7865	101.682	Barth et al. (2009)
WQ1	Stanford	WQ1_40.1	476.715	0.819935	1252.76	14.9742	1231.23	12.1364	1231.23	12.1364	101.748	Barth et al. (2009)
WQ1	Stanford	WQ1_32.1	154.952	1.03941	1436.67	19.0112	1411.87	21.4815	1411.87	21.4815	101.756	Barth et al. (2009)
WQ1	Stanford	WQ971-13.1	36.435	0.483884	1401.59	22.5005	1371.6	56.3343	1371.6	56.3343	102.186	Barth et al. (2009)
WQ1	Stanford	WQ1_34.1	252.737	0.0817465	1257.3	15.739	1227.74	17.0799	1227.74	17.0799	102.407	Barth et al. (2009)
WQ1	Stanford	WQ1_58.1	43.0964	0.00976528	1185.28	19.8427	1154.87	63.3382	1154.87	63.3382	102.633	Barth et al. (2009)
WQ1	Stanford	WQ1_64.1	165.922	0.411547	1470.19	15.9063	1432.24	20.6083	1432.24	20.6083	102.65	Barth et al. (2009)
WQ1	Stanford	WQ971-15.1	298.095	0.170607	2029.96	15.8288	1963.46	10.7352	1963.46	10.7352	103.387	Barth et al. (2009)
WQ1	Stanford	WQ1_35.1	153.9	1.43295	1110.84	14.8458	1070.86	25.2688	1070.86	25.2688	103.734	Barth et al. (2009)
WQ1	Stanford	WQ1_59.1	398.247	0.731514	1266.51	11.6976	1216.4	14.8264	1216.4	14.8264	104.12	Barth et al. (2009)
WQ1	Stanford	WQ971-3.1	254.205	0.18254	1078.18	8.76498	1034.83	26.338	1034.83	26.338	104.189	Barth et al. (2009)
WQ1	Stanford	WQ971-16.1	137.615	0.931208	1514.06	16.9166	1432.36	30.9147	1432.36	30.9147	105.703	Barth et al. (2009)
WQ2	Stanford	WQ97-2-7.1	147.381	1.14768	1078.09	7.67046	1343.09	29.9901	1343.09	29.9901	80.2695	Barth et al. (2009)
WQ2	Stanford	WQ97-2-26.1	672.045	0.502454	950.174	3.09725	1148.25	12.0779	1148.25	12.0779	82.7498	Barth et al. (2009)
WQ2	Stanford	WQ97-2-1	254.705	1.66078	1030.3	5.24906	1225.92	21.9609	1225.92	21.9609	84.0431	Barth et al. (2009)
WQ2	Stanford	WQ97-2-12.1	152.921	0.459313	1169.75	8.10931	1376.67	19.9212	1376.67	19.9212	84.9697	Barth et al. (2009)
WQ2	Stanford	WQ97-2-32.1	506.838	0.459943	1277.87	4.59497	1456.9	10.1999	1456.9	10.1999	87.7116	Barth et al. (2009)
WQ2	Stanford	WQ97-2-15.1	16.2033	0.00522722	1176.7	24.0608	1310.44	71.1401	1310.44	71.1401	89.7942	Barth et al. (2009)
WQ2	Stanford	WQ97-2-20.1	67.1051	0.455274	1226.95	12.6316	1351.41	29.1405	1351.41	29.1405	90.7906	Barth et al. (2009)
WQ2	Stanford	WQ97-2-22.1	55.8165	1.12068	1124.77	12.8919	1231.52	45.803	1231.52	45.803	91.332	Barth et al. (2009)
WQ2	Stanford	WQ97-2-13.1	98.3521	0.878573	1706.7	13.7349	1868.25	16.3409	1868.25	16.3409	91.3528	Barth et al. (2009)
WQ2	Stanford	WQ97-2-18.1	353.631	0.283507	1344.1	5.77549	1434.91	11.3016	1434.91	11.3016	93.6713	Barth et al. (2009)
WQ2	Stanford	WQ97-2-8.1	187.975	0.916601	1324.09	8.2739	1396.61	20.4823	1396.61	20.4823	94.808	Barth et al. (2009)
WQ2	Stanford	WQ97-2-12.1	131.65	0.78448	1037.14	7.71929	1086.68	28.0824	1086.68	28.0824	95.4414	Barth et al. (2009)
WQ2	Stanford	WQ97-2-33.1	157.313	0.462168	1823.78	11.565	1893.16	12.3331	1893.16	12.3331	96.3351	Barth et al. (2009)
WQ2	Stanford	WQ97-2-36.1	343.257	0.53391	1186.33	5.31808	1219.23	13.7305	1219.23	13.7305	97.302	Barth et al. (2009)
WQ2	Stanford	WQ97-2-9.1	83.7546	0.816699	1763.98	15.472	1810.56	19.0906	1810.56	19.0906	97.4272	Barth et al. (2009)
WQ2	Stanford	WQ97-2-2	97.8563	0.699761	927.708	7.81811	950.101	30.358	950.101	30.358	97.6432	Barth et al. (2009)
WQ2	Stanford	WQ97-2-37.1	68.2099	0.573213	1449.43	13.9976	1478.72	31.3908	1478.72	31.3908	98.0187	Barth et al. (2009)
WQ2	Stanford	WQ97-2-30.1	121.573	0.858378	1772.29	12.8143	1792.42	17.0781	1792.42	17.0781	98.8768	Barth et al. (2009)
WQ2	Stanford	WQ97-2-25.1	276.015	0.032332	1183.02	5.91279	1194.94	15.2549	1194.94	15.2549	99.0028	Barth et al. (2009)
WQ2	Stanford	WQ97-2-38.1	150.836	0.364988	1978.58	14.794	1992.03	12.9037	1992.03	12.9037	99.325	Barth et al. (2009)
WQ2	Stanford	WQ97-2-16.1	78.8233	0.711097	1872.87	16.6163	1880.31	17.6882	1880.31	17.6882	99.6045	Barth et al. (2009)
WQ2	Stanford	WQ97-2-17.1	113.816	1.39083	1833.42	13.5559	1840.55	16.0323	1840.55	16.0323	99.6125	Barth et al. (2009)
WQ2	Stanford	WQ97-2-11.1	169.907	0.704837	1145.64	7.40819	1148.4	20.3442	1148.4	20.3442	99.7592	Barth et al. (2009)
WQ2	Stanford	WQ97-2-19.1	225.447	0.239598	1878.96	10.6144	1864.97	11.4427	1864.97	11.4427	100.75	Barth et al. (2009)
WQ2	Stanford	WQ97-2-21.1	139.201	1.1918	1442.51	9.93947	1431.6	18.1099	1431.6	18.1099	100.762	Barth et al. (2009)
WQ2	Stanford	WQ97-2-6.1	75.4973	0.466723	1644.78	15.6557	1631.27	29.1207	1631.27	29.1207	100.828	Barth et al. (2009)
WQ2	Stanford	WQ97-2-35.1	351.913	0.74789	1229.4	5.42455	1215.06	13.5245	1215.06	13.5245	101.181	Barth et al. (2009)
WQ2	Stanford	WQ97-2-34.1	80.8741	0.638082	1420.1	12.768	1402.72	25.9161	1402.72	25.9161	101.239	Barth et al. (2009)
WQ2	Stanford	WQ97-2-5.1	148.675	0.393992	1248.7	12.5474	1227.12	26.6621	1227.12	26.6621	101.759	Barth et al. (2009)
WQ2	Stanford	WQ97-2-29.1	242.745	0.724677	913.02	5.17221	894.828	22.2907	894.828	22.2907	102.033	Barth et al. (2009)
WQ2	Stanford	WQ97-2-27.1	36.3717	1.33486	1455.16	19.3874	1425.88	40.0676	1425.88	40.0676	102.053	Barth et al. (2009)
WQ2	Stanford	WQ97-2-14.1	67.2197	0.772261	1225.88	12.6372	1189.92	42.4471	1189.92	42.4471	103.022	Barth et al. (2009)
WQ2	Stanford	WQ97-2-28.1	67.118	0.896672	1242.75	12.4441	1204.47	39.2399	1204.47	39.2399	103.178	Barth et al. (2009)
WQ2	Stanford	WQ97-2-31.1	54.872	0.817844	1496.71	16.2392	1444.55	27.3925	1444.55	27.3925	103.611	Barth et al. (2009)
WQ2	Stanford	WQ97-2-24.1	173.368	0.979155	1484.32	9.21993	1427.02	34.3007	1427.02	34.3007	104.016	Barth et al. (2009)
WH4	Stanford	18	173.955	0.797998	1173.09	14.4233	1453.91	36.9785	1453.91	36.9785	80.6849	Barth et al. (2009)
WH4	Stanford	25	454.95	0.335839	969.101	10.3269	1190.62	18.4888	1190.62	18.4888	81.3943	Barth et al. (2009)
WH4	Stanford	49	364.376	0.349095	985.636	11.8462	1206.49	31.1534	1206.49	31.1534	81.6946	Barth et al. (2009)
WH4	Stanford	45	564.803	0.122148	1211.39	12.7192	1437.35	14.7594	1437.35	14.7594	84.2794	Barth et al. (2009)
WH4	Stanford	8	61.4901	0.518258	1273.13	25.2739	1508.46	47.0094	1508.46	47.0094	84.3994	Barth et al. (2009)
WH4	Stanford	35	299.4	0.673945	1260.21	13.9517	1488.43	18.1012	1488.43	18.1012	84.6673	Barth et al. (2009)
WH4	Stanford	57	136.196	0.90577	1549.23	21.4882	1799.37	27.6353	1799.37	27.6353	86.0987	Barth et al. (2009)
WH4	Stanford	42	88.7925	0.610221	1305.42	19.79	1514.65	39.7945	1514.65	39.7945	86.186	Barth et al. (2009)
WH4	Stanford	59	542.517	0.673288	1031.25	11.5651	1195.03	23.6314	1195.03	23.6314	86.2946	Barth et al. (2009)
WH4	Stanford	54	291.734	0.582909	1619.37	19.0077	1870.89	15.9988	1870.89	15.9988	86.5558	Barth et al. (2009)
WH4	Stanford	20	161.009	0.368105	1183.46	14.6321	1354.68	26.3377	1354.68	26.3377	87.3612	Barth et al. (2009)
WH4	Stanford	44	179.917	0.962277	1264.67	15.8646	1446.66	26.0188	1446.66	26.0188	87.42	Barth et al. (2009)
WH4	Stanford	17	117.048	0.525558	1296.58	17.3631	1474.14	27.9055	1474.14	27.9055	87.955	Barth et al. (2009)
WH4	Stanford	51	135.049	1.46349	1630.99	22.07	1806.04	26.9695	1806.04	26.9695	90.3073	Barth et al. (2009)
WH4	Stanford	14	232.772	0.477792	1216.15	14.4898	1342.63	22.2324	1342.63	22.2324	90.5801	Barth et al. (2009)
WH4	Stanford	34	200.222	0.699924	1619.36	19.852	1785.28	16.0552	1785.28	16.0552	90.7061	Barth et al. (2009)
WH4	Stanford	37	370.201	0.135365	1519.49	16.7392	1661.91	20.1433	1661.91	20.1433	91.4301	Barth et al. (2009)
WH4	Stanford	22	134.063	0.899378	1708.21	21.4569	1867.39	19.006	1867.39	19.006	91.4758	Barth et al. (2009)
WH4	Stanford	39	349.508	0.459276	1328.89	14.8147	1451.99	18.2836	1451.99	18.2836	91.5223	Barth et al. (2009)
WH4	Stanford	38	157.111	0.661444	1363.72	18.0468	1470.96	29.2646	1470.96	29.2646	92.7094	Barth et al. (2009)
WH4	Stanford	55	322.172	0.510506	1739.33	20.0916	1875.37	14.7224	1875.37	14.7224	92.746	Barth et al. (2009)
WH4	Stanford	30	289.729	0.460127	1368.09	15.1809	1463.8	17.1108	1463.8	17.1108	93.4611	Barth et al. (2009)
WH4	Stanford	29	76.5263	0.675727	1087.1	16.8232	1162.78	43.1967	1162.78	43.1967	93.4915	Barth et al. (2009)
WH4	Stanford	24	230.261	0.513553	1139.34	13.1155	1192.16	23.3076	1192.16	23.3076	95.5699	Barth et al. (2009)
WH4	Stanford	43	429.929	1.11297	1303.39	16.4981	1357.61	27.5247	1357.61	27.5247	96.0066	Barth et al. (2009)
WH4	Stanford	58	127.269	0.96234	1093.6	15.9681	1118.43	48.2777	1118.43	48.2777	97.7804	Barth et al. (2009)
WH4	Stanford	15	89.6358	0.921986	1138.44	15.9754	1162.46	48.8094	1162.46	48.8094	97.9336	Barth et al. (2009)
WH4	Stanford	33	173.182	0.726112	1088.36	13.1573	1108.48	28.0271	1108.48	28.0271	98.1846	Barth et al. (2009)
WH4	Stanford	21	148.099	0.698416	1425.06	17.3049	1448.18	22.8027	1448.18	22.8027	98.4032	Barth et al. (2009)
WH4	Stanford	31	125.003	0.50818	1036.35	13.8748	1046.05	36.3479	1046.05	36.3479	99.073	Barth et al. (2009)
WH4	Stanford	46	145.564	0.255681	1567.53	21.1974	1568.09	31.2896	1568.09	31.2896	99.9648	Barth et al. (2009)
WH4	Stanford	28	254.72	0.615223	1245.94	14.2281	1242.85	21.0985	1242.85	21.0985	100.249	Barth et al. (2009)
LG0	Stanford	9	264.824	1.05096	1153.16	14.3891	1412.4	27.2029	1412.4	27.2029	81.6452	Barth et al. (2009)
LG0	Stanford	14	149.834	1.09141	1218.24	14.819	1479.37	37.6187	1479.37	37.6187	82.3485	Barth et al. (2009)
LG0	Stanford	8	445.696	0.0858021	2472.7	31.8924	2929.05	8.21164	2929.05	8.21164	84.4201	Barth et al. (2009)
LG0	Stanford	30	161.489	1.55518	1582.55	30.2333	1866.37	20.3672	1866.37	20.3672	84.793	Barth et al. (2009)
LG0	Stanford	3	342.269	0.67776	1209.72	13.8003	1422.25	25.5498	1422.25	25.5498	85.0571	Barth et al. (2009)
LG0	Stanford	20	186.146	0.521289	1636.87	20.0384	1892.16	20.4521	1892.16	20.4521	86.5081	Barth et al. (2009)
LG0	Stanford	4	271.845	0.832419	1275.13	15.1691	1469.52	20.5196	1469.52	20.5196	86.7717	Barth et al. (2009)
LG0	Stanford	29	312.093	0.0418027	1074.36	19.3662	1238.11	26.2633	1238.11	26.2633	86.7737	Barth et al. (2009)
LG0	Stanford	25	118.45	0.959191	1635.33	32.6794	1842.5	23.6545	1842.5	23.6545	88.7557	Barth et al. (2009)
LG0	Stanford	31	173.479	1.23073	1674.2	32.8723	1881.38	20.2347	1881.38	20.2347	88.9882	Barth et al. (2009)
LG0	Stanford	40	88.5031	0.593891	1271.52	27.2735	1423.51	49.1445	1423.51	49.1445	89.3229	Barth et al. (2009)
LG0	Stanford	43	63.3884	0.869404	1355.07	28.8844	1507.17	40.0567	1507.17	40.0567	89.9086	Barth et al. (2009)
LG0	Stanford	13	208.213	0.242508	1162.01	14.4427	1251.66	31.2006	1251.66	31.2006	92.8372	Barth et al. (2009)
LG0	Stanford	17	154.935	0.424847	1387.62	18.2779	1481.68	77.9779	1481.68	77.9779	93.6518	Barth et al. (2009)
LG0	Stanford	39	232.125	0.449593	1744.22	32.7698	1849.54	19.8413	1849.54	19.8413	94.3052	Barth et al. (2009)
LG0	Stanford	5	117.313	1.02477	1742.81	23.3714	1830.19	23.1536	1830.19	23.1536	95.2259	Barth et al. (2009)
LG0	Stanford	11	160.719	1.36523	1163.63	14.7207	1218.65	35.598	1218.65	35.598	95.485	Barth et al. (2009)
LG0	Stanford	34	334.949	0.33623	1153.93	20.5928	1204.93	21.9042	1204.93	21.9042	95.7676	Barth et al. (2009)
LG0	Stanford	38	167.926	0.505786	1142.43	22.0116	1189.88	33.8034	1189.88	33.8034	96.0121	Barth et al. (2009)
LG0	Stanford	37	118.433	0.528751	1727.7	34.2376	1797.42	23.1168	1797.42	23.1168	96.121	Barth et al. (2009)
LG0	Stanford	10	192.23	1.09541	1806.59	21.9562	1857.78	18.2872	1857.78	18.2872	97.2448	Barth et al. (2009)
LG0	Stanford	36	212.813	0.530205	1409.41	26.8152	1448.65	23.0486	1448.65	23.0486	97.2909	Barth et al. (2009)
LG0	Stanford	32	47.6761	0.656598	1435.14	32.5499	1472.18	51.8186	1472.18	51.8186	97.484	Barth et al. (2009)
LG0	Stanford	18	344.584	0.872927	1194.63	12.9986	1223.08	19.8437	1223.08	19.8437	97.6742	Barth et al. (2009)
LG0	Stanford	41	157.206	1.21739	1781.53	33.8297	1801.43	18.361	1801.43	18.361	98.8952	Barth et al. (2009)
LG0	Stanford	15	159.314	0.541011	1131.63	14.9603	1136.42	42.4141	1136.42	42.4141	99.5782	Barth et al. (2009)
LG0	Stanford	16	78.1816	0.766206	1120.4	17.0738	1120.79	46.4081	1120.79	46.4081	99.9652	Barth et al. (2009)
LG0	Stanford	21	196.899	0.773505	1817.14	21.8817	1801.28	29.0727	1801.28	29.0727	100.88	Barth et al. (2009)
LG0	Stanford	7	162.358	0.4017	1405.09	19.0885	1389.48	41.381	1389.48	41.381	101.123	Barth et al. (2009)
LG0	Stanford	44	56.7047	0.916445	1177.65	25.9084	1154.45	71.5771	1154.45	71.5771	102.01	Barth et al. (2009)
LG3	Stanford	LG3-52	745.421	0.462646	1607.12	17.2643	1976.91	11.4838	1976.91	11.4838	81.2944	Barth et al. (2009)
LG3	Stanford	LG3-26	885.567	0.0368739	929.115	9.3617	1136.03	15.295	1136.03	15.295	81.7864	Barth et al. (2009)
LG3	Stanford	LG3-18	182.807	1.95226	1463.18	18.3676	1767.59	24.3409	1767.59	24.3409	82.778	Barth et al. (2009)
LG3	Stanford	LG3-10	310.477	0.410063	1583.15	18.0597	1911.37	16.2104	1911.37	16.2104	82.8278	Barth et al. (2009)
LG3	Stanford	LG3-2	192.83	0.613759	1166.34	15.091	1387.62	30.0352	1387.62	30.0352	84.0536	Barth et al. (2009)
LG3	Stanford	LG3-14	623.417	0.217396	915.669	9.75872	1089.13	20.4472	1089.13	20.4472	84.0737	Barth et al. (2009)
LG3	Stanford	LG3-12	270.612	0.897442	1575.46	18.1014	1872.31	16.0803	1872.31	16.0803	84.1451	Barth et al. (2009)
LG3	Stanford	LG3-49	143.97	0.2987	1086.67	14.2879	1286.25	47.4105	1286.25	47.4105	84.4839	Barth et al. (2009)
LG3	Stanford	LG3-17	748.816	0.410815	1010.1	10.3519	1192.91	15.5641	1192.91	15.5641	84.6753	Barth et al. (2009)
LG3	Stanford	LG3-8	554.91	0.198261	1575.87	16.9345	1860.68	13.1658	1860.68	13.1658	84.6935	Barth et al. (2009)
LG3	Stanford	LG3-5	632.632	0.66752	1016.94	10.5592	1197.11	19.6603	1197.11	19.6603	84.9495	Barth et al. (2009)
LG3	Stanford	LG3-7	789.514	0.145744	921.035	9.79562	1077.46	17.3898	1077.46	17.3898	85.4822	Barth et al. (2009)
LG3	Stanford	LG3-33	363.201	0.433154	1238.09	13.7919	1428.06	19.717	1428.06	19.717	86.697	Barth et al. (2009)
LG3	Stanford	LG3-15	106.149	0.554116	1287.96	19.0184	1446.62	35.9166	1446.62	35.9166	89.0325	Barth et al. (2009)
LG3	Stanford	LG3-4	555.195	0.0333622	1096.6	11.4341	1194.03	18.1308	1194.03	18.1308	91.8403	Barth et al. (2009)
LG3	Stanford	LG3-42	638.712	0.336104	972.134	10.1438	1058.33	18.9375	1058.33	18.9375	91.8556	Barth et al. (2009)
LG3	Stanford	LG3-43	295.847	0.56216	1397.02	16.4698	1478.82	23.4965	1478.82	23.4965	94.4689	Barth et al. (2009)
LG3	Stanford	LG3-53	486.476	0.478721	2572.26	34.0469	2715.92	8.3394	2715.92	8.3394	94.7107	Barth et al. (2009)
LG3	Stanford	LG3-60	162.512	1.81408	1758.67	23.1356	1844.18	18.7789	1844.18	18.7789	95.3632	Barth et al. (2009)
LG3	Stanford	LG3-31	212.823	0.427933	1169.31	14.3218	1218.99	28.7374	1218.99	28.7374	95.9245	Barth et al. (2009)
LG3	Stanford	LG3-57	145.878	0.689962	2451.52	38.2445	2544.21	17.2201	2544.21	17.2201	96.3566	Barth et al. (2009)
LG3	Stanford	LG3-1	113.978	0.575625	1394.62	18.3669	1446.77	30.2896	1446.77	30.2896	96.3953	Barth et al. (2009)
LG3	Stanford	LG3-47	322.566	0.595768	1403.91	16.1602	1437.6	17.8741	1437.6	17.8741	97.6565	Barth et al. (2009)
LG3	Stanford	LG3-11	529.2	1.06811	1163.3	18.6097	1186.1	29.7507	1186.1	29.7507	98.0778	Barth et al. (2009)
LG3	Stanford	LG3-34	149.24	0.77926	1182.38	15.5702	1203.18	36.4319	1203.18	36.4319	98.271	Barth et al. (2009)
LG3	Stanford	LG3-13	243.695	0.763523	1905.57	23.6232	1928.66	16.0805	1928.66	16.0805	98.8026	Barth et al. (2009)
LG3	Stanford	LG3-36	183.519	0.552145	1879.04	23.2217	1891.91	17.5267	1891.91	17.5267	99.32	Barth et al. (2009)
LG3	Stanford	LG3-44	194.362	0.418363	1409.43	17.5247	1385.55	27.3337	1385.55	27.3337	101.724	Barth et al. (2009)
LG3	Stanford	LG3-48	176.388	0.595198	615.822	8.58224	603.321	88.8974	615.822	8.58224	102.072	Barth et al. (2009)
LG3	Stanford	LG3-28	94.439	0.917391	868.493	25.5046	848.535	66.9056	868.493	25.5046	102.352	Barth et al. (2009)
MR1	Stanford	50	216.597	0.62766	1133.78	12.9545	1342.53	54.413	1342.53	54.413	84.4508	Barth et al. (2009)
MR1	Stanford	13.1	292.236	0.908243	952.442	6.58934	1107.41	27.8556	1107.41	27.8556	86.0061	Barth et al. (2009)
MR1	Stanford	47	196.461	0.526662	1029.17	12.5554	1181.09	28.5053	1181.09	28.5053	87.1373	Barth et al. (2009)
MR1	Stanford	32	329.828	0.518842	1286.6	14.1011	1473.38	16.6033	1473.38	16.6033	87.3232	Barth et al. (2009)
MR1	Stanford	29	119.616	0.448838	1326.9	17.3004	1500.03	26.7752	1500.03	26.7752	88.4583	Barth et al. (2009)
MR1	Stanford	43	361.232	0.784997	1285.34	13.9915	1425.47	16.9162	1425.47	16.9162	90.1694	Barth et al. (2009)
MR1	Stanford	27	91.38	0.545552	1210.94	20.2773	1338.8	53.0793	1338.8	53.0793	90.45	Barth et al. (2009)
MR1	Stanford	45	400.365	0.377562	1325.66	14.2996	1451.17	18.1472	1451.17	18.1472	91.3513	Barth et al. (2009)
MR1	Stanford	40	210.766	0.291009	1526.6	18.0171	1660.65	18.2117	1660.65	18.2117	91.9277	Barth et al. (2009)
MR1	Stanford	11	240.737	0.382657	1527.18	7.29676	1654.05	23.1775	1654.05	23.1775	92.3298	Barth et al. (2009)
MR1	Stanford	28	390.964	0.297206	1328.15	14.2012	1427.93	16.1385	1427.93	16.1385	93.0119	Barth et al. (2009)
MR1	Stanford	39	103.972	0.681855	1787.89	25.0855	1899.67	22.8582	1899.67	22.8582	94.1161	Barth et al. (2009)
MR1	Stanford	24	175.428	0.650244	1768.3	21.9733	1867.99	18.6958	1867.99	18.6958	94.6629	Barth et al. (2009)
MR1	Stanford	14	43.7227	0.638727	1172.16	13.5556	1237.05	50.0751	1237.05	50.0751	94.7544	Barth et al. (2009)
MR1	Stanford	52	152.085	0.47359	1566.64	19.4487	1652.05	23.2994	1652.05	23.2994	94.8303	Barth et al. (2009)
MR1	Stanford	42	129.875	0.563438	1616.18	20.8771	1700.88	22.3179	1700.88	22.3179	95.0201	Barth et al. (2009)
MR1	Stanford	53	116.723	0.321219	1754.4	23.908	1844.09	26.2239	1844.09	26.2239	95.1365	Barth et al. (2009)
MR1	Stanford	25	206.262	0.798364	1370.31	16.2139	1439.64	22.4598	1439.64	22.4598	95.1841	Barth et al. (2009)
MR1	Stanford	8	227.482	0.757469	1525.22	7.32698	1597.66	16.4536	1597.66	16.4536	95.4663	Barth et al. (2009)
MR1	Stanford	51	159.023	0.466166	1626.89	19.3003	1670.96	19.3794	1670.96	19.3794	97.3624	Barth et al. (2009)
MR1	Stanford	44	233.854	0.6421	1419.53	16.4966	1449.8	19.1677	1449.8	19.1677	97.9121	Barth et al. (2009)
MR1	Stanford	35	155.319	1.09316	1412.57	17.5889	1436.21	25.4077	1436.21	25.4077	98.3536	Barth et al. (2009)
MR1	Stanford	4	167.345	0.483942	1615.69	9.79979	1640.27	16.864	1640.27	16.864	98.5018	Barth et al. (2009)
MR1	Stanford	36	80.8347	1.03132	1440.21	21.6206	1459.43	32.73	1459.43	32.73	98.6827	Barth et al. (2009)
MR1	Stanford	15	194.895	0.571214	1603.01	8.25003	1624.08	13.9113	1624.08	13.9113	98.7031	Barth et al. (2009)
MR1	Stanford	33	265.518	1.06935	1408.84	15.8396	1420.69	19.503	1420.69	19.503	99.166	Barth et al. (2009)
MR1	Stanford	58	111.727	0.65981	1684.28	21.9266	1686.47	23.6336	1686.47	23.6336	99.87	Barth et al. (2009)
MR1	Stanford	38	261.19	0.194332	1441.56	16.5487	1438.36	18.9776	1438.36	18.9776	100.222	Barth et al. (2009)
MR1	Stanford	34	146.507	0.545043	1216.36	16.3124	1205.66	28.4153	1205.66	28.4153	100.888	Barth et al. (2009)
MR1	Stanford	20	61.3592	0.521026	1477.26	14.729	1444.54	28.7581	1444.54	28.7581	102.265	Barth et al. (2009)
MR1	Stanford	26	74.8198	0.488664	1266.8	19.4228	1234.55	40.6357	1234.55	40.6357	102.612	Barth et al. (2009)
MR1	Stanford	22	166.91	0.658271	1475.64	17.9252	1437.38	22.3736	1437.38	22.3736	102.661	Barth et al. (2009)
MR1	Stanford	60	173.172	0.499753	1679.31	19.4598	1630.25	17.3156	1630.25	17.3156	103.01	Barth et al. (2009)
MR1	Stanford	17	107.434	0.492986	1478.16	10.7982	1433.21	22.9827	1433.21	22.9827	103.137	Barth et al. (2009)
MR1	Stanford	21	209.119	0.983363	1483.28	7.85467	1425.34	16.7657	1425.34	16.7657	104.065	Barth et al. (2009)
MR1	Stanford	49	80.8891	0.964793	1949.18	27.1515	1871.39	21.0618	1871.39	21.0618	104.157	Barth et al. (2009)
MR1	Stanford	55	86.1462	0.600827	1683.18	22.8254	1613.61	26.5067	1613.61	26.5067	104.311	Barth et al. (2009)
MR1	Stanford	7	246.921	0.563707	1694.33	8.28916	1618.62	14.8034	1618.62	14.8034	104.677	Barth et al. (2009)

## Sheet: Dripping Springs
Sample	Lab	Analysis ID	ppm U	Th/U	6/8 Age	1s	7/6 Age	1s	Best Age	1s	Conc	Data Source
K16-salt-2	UA	K16-Salt-2-Spot 191	24	0.833333	1333.6	48.6	1284.7	20.3	1284.7	20.3	103.806	Mulder et al. (2017)
K16-salt-2	UA	K16-Salt-2-Spot 5	20	0.666667	1331.3	45.9	1288.5	20	1288.5	20	103.322	Mulder et al. (2017)
K16-salt-2	UA	K16-Salt-2-Spot 80	15	0.588235	1358.7	62.4	1296.9	25.3	1296.9	25.3	104.765	Mulder et al. (2017)
K16-salt-2	UA	K16-Salt-2-Spot 213	18	0.588235	1302.4	46.9	1302.1	40.6	1302.1	40.6	100.023	Mulder et al. (2017)
K16-salt-2	UA	K16-Salt-2-Spot 270	19	0.555556	1321	63.6	1304.6	36.8	1304.6	36.8	101.257	Mulder et al. (2017)
K16-salt-2	UA	K16-Salt-2-Spot 41	61	0.714286	1350	35.1	1315.4	15.7	1315.4	15.7	102.63	Mulder et al. (2017)
K16-salt-2	UA	K16-Salt-2-Spot 155	67	0.625	1294.2	29.3	1319.5	14.7	1319.5	14.7	98.0826	Mulder et al. (2017)
K16-salt-2	UA	K16-Salt-2-Spot 184	98	0.526316	1321.8	30.1	1319.8	14	1319.8	14	100.152	Mulder et al. (2017)
K16-salt-2	UA	K16-Salt-2-Spot 31	47	0.833333	1335.8	37	1322.2	16.4	1322.2	16.4	101.029	Mulder et al. (2017)
K16-salt-2	UA	K16-Salt-2-Spot 293	48	0.714286	1311.6	35.6	1323.4	18.9	1323.4	18.9	99.1084	Mulder et al. (2017)
K16-salt-2	UA	K16-Salt-2-Spot 35	49	0.384615	1341.8	34.7	1324.3	19.9	1324.3	19.9	101.321	Mulder et al. (2017)
K16-salt-2	UA	K16-Salt-2-Spot 201	84	0.454545	1339.4	26.1	1326.9	10.6	1326.9	10.6	100.942	Mulder et al. (2017)
K16-salt-2	UA	K16-Salt-2-Spot 215	16	0.588235	1324.2	59.5	1327.4	24.7	1327.4	24.7	99.7589	Mulder et al. (2017)
K16-salt-2	UA	K16-Salt-2-Spot 126	23	0.714286	1346.8	52.1	1328.3	38.6	1328.3	38.6	101.393	Mulder et al. (2017)
K16-salt-2	UA	K16-Salt-2-Spot 95	49	0.526316	1312.4	33.4	1329.1	20.3	1329.1	20.3	98.7435	Mulder et al. (2017)
K16-salt-2	UA	K16-Salt-2-Spot 287	55	0.384615	1300.4	32.5	1329.6	13.9	1329.6	13.9	97.8039	Mulder et al. (2017)
K16-salt-2	UA	K16-Salt-2-Spot 219	20	0.625	1373.2	53.2	1330.9	16.2	1330.9	16.2	103.178	Mulder et al. (2017)
K16-salt-2	UA	K16-Salt-2-Spot 209	59	0.384615	1297.6	35.6	1333.4	16.8	1333.4	16.8	97.3151	Mulder et al. (2017)
K16-salt-2	UA	K16-Salt-2-Spot 49	20	0.714286	1312.9	49.7	1337.4	23.2	1337.4	23.2	98.1681	Mulder et al. (2017)
K16-salt-2	UA	K16-Salt-2-Spot 76	26	0.833333	1339.5	45.3	1339.5	17.2	1339.5	17.2	100	Mulder et al. (2017)
K16-salt-2	UA	K16-Salt-2-Spot 169	30	0.833333	1335.4	48.3	1341.1	18.5	1341.1	18.5	99.575	Mulder et al. (2017)
K16-salt-2	UA	K16-Salt-2-Spot 103	111	0.555556	1314.5	28.8	1341.8	13.9	1341.8	13.9	97.9654	Mulder et al. (2017)
K16-salt-2	UA	K16-Salt-2-Spot 29	17	0.555556	1341.6	72.1	1342.3	17.6	1342.3	17.6	99.9479	Mulder et al. (2017)
K16-salt-2	UA	K16-Salt-2-Spot 206	17	0.588235	1287.7	62.3	1344.5	19.5	1344.5	19.5	95.7754	Mulder et al. (2017)
K16-salt-2	UA	K16-Salt-2-Spot 284	36	1	1377.6	54.4	1346.2	18.5	1346.2	18.5	102.332	Mulder et al. (2017)
K16-salt-2	UA	K16-Salt-2-Spot 294	38	0.5	1302.7	33.3	1349.3	14	1349.3	14	96.5464	Mulder et al. (2017)
K16-salt-2	UA	K16-Salt-2-Spot 266	103	0.263158	1372.2	24.3	1352.7	11.1	1352.7	11.1	101.442	Mulder et al. (2017)
K16-salt-2	UA	K16-Salt-2-Spot 81	57	0.666667	1323	29.8	1355.3	17.1	1355.3	17.1	97.6168	Mulder et al. (2017)
K16-salt-2	UA	K16-Salt-2-Spot 296	16	0.714286	1344.2	61.5	1360.8	19.7	1360.8	19.7	98.7801	Mulder et al. (2017)
K16-salt-2	UA	K16-Salt-2-Spot 24	85	0.625	1358.8	30.5	1361.2	13.2	1361.2	13.2	99.8237	Mulder et al. (2017)
K16-salt-2	UA	K16-Salt-2-Spot 7	141	0.333333	1353.7	31.7	1361.7	14	1361.7	14	99.4125	Mulder et al. (2017)
K16-salt-2	UA	K16-Salt-2-Spot 54	24	0.666667	1306.2	40.2	1362.6	21.4	1362.6	21.4	95.8609	Mulder et al. (2017)
K16-salt-2	UA	K16-Salt-2-Spot 92	46	1.11111	1341.6	39.2	1363.2	15.5	1363.2	15.5	98.4155	Mulder et al. (2017)
K16-salt-2	UA	K16-Salt-2-Spot 252	24	0.625	1279.2	40.4	1363.9	20.7	1363.9	20.7	93.7899	Mulder et al. (2017)
K16-salt-2	UA	K16-Salt-2-Spot 32	23	0.625	1333.9	42.9	1365.3	23.7	1365.3	23.7	97.7001	Mulder et al. (2017)
K16-salt-2	UA	K16-Salt-2-Spot 277	38	0.769231	1332.7	41.8	1369.3	21.6	1369.3	21.6	97.3271	Mulder et al. (2017)
K16-salt-2	UA	K16-Salt-2-Spot 146	42	0.454545	1304.1	36.4	1370.4	15.5	1370.4	15.5	95.162	Mulder et al. (2017)
K16-salt-2	UA	K16-Salt-2-Spot 137	84	0.769231	1352	31.7	1375	14.6	1375	14.6	98.3273	Mulder et al. (2017)
K16-salt-2	UA	K16-Salt-2-Spot 298	44	0.5	1311.7	33.1	1375.1	13.7	1375.1	13.7	95.3894	Mulder et al. (2017)
K16-salt-2	UA	K16-Salt-2-Spot 271	123	0.434783	1375.3	21.9	1376.8	11.8	1376.8	11.8	99.8911	Mulder et al. (2017)
K16-salt-2	UA	K16-Salt-2-Spot 238	117	0.30303	1345.6	22.4	1378	13.7	1378	13.7	97.6488	Mulder et al. (2017)
K16-salt-2	UA	K16-Salt-2-Spot 278	24	0.625	1335.5	45.3	1378.8	22.4	1378.8	22.4	96.8596	Mulder et al. (2017)
K16-salt-2	UA	K16-Salt-2-Spot 94	29	0.714286	1297.6	47.9	1380.6	19.7	1380.6	19.7	93.9881	Mulder et al. (2017)
K16-salt-2	UA	K16-Salt-2-Spot 205	18	0.588235	1306.8	60.8	1381.5	23.2	1381.5	23.2	94.5928	Mulder et al. (2017)
K16-salt-2	UA	K16-Salt-2-Spot 33	67	0.666667	1418.2	36.6	1384.6	15.8	1384.6	15.8	102.427	Mulder et al. (2017)
K16-salt-2	UA	K16-Salt-2-Spot 203	41	0.625	1355.7	37	1386.6	16.8	1386.6	16.8	97.7715	Mulder et al. (2017)
K16-salt-2	UA	K16-Salt-2-Spot 14	16	0.769231	1337.5	59.9	1386.8	20.5	1386.8	20.5	96.4451	Mulder et al. (2017)
K16-salt-2	UA	K16-Salt-2-Spot 147	18	0.625	1325.2	54.2	1387.4	20.6	1387.4	20.6	95.5168	Mulder et al. (2017)
K16-salt-2	UA	K16-Salt-2-Spot 6	78	0.769231	1378.3	26.2	1387.5	12.4	1387.5	12.4	99.3369	Mulder et al. (2017)
K16-salt-2	UA	K16-Salt-2-Spot 70	22	0.625	1342.7	52.8	1387.6	16.2	1387.6	16.2	96.7642	Mulder et al. (2017)
K16-salt-2	UA	K16-Salt-2-Spot 4	18	0.666667	1303.8	50.8	1391	22.9	1391	22.9	93.7311	Mulder et al. (2017)
K16-salt-2	UA	K16-Salt-2-Spot 262	18	0.769231	1375	57.8	1391.4	20	1391.4	20	98.8213	Mulder et al. (2017)
K16-salt-2	UA	K16-Salt-2-Spot 202	73	0.333333	1376.4	21.7	1392.8	12.5	1392.8	12.5	98.8225	Mulder et al. (2017)
K16-salt-2	UA	K16-Salt-2-Spot 233	51	0.588235	1333.2	34.6	1398.5	20.3	1398.5	20.3	95.3307	Mulder et al. (2017)
K16-salt-2	UA	K16-Salt-2-Spot 55	48	0.909091	1366.3	45	1402.4	19.5	1402.4	19.5	97.4258	Mulder et al. (2017)
K16-salt-2	UA	K16-Salt-2-Spot 25	98	0.588235	1435.9	26.7	1409.8	14.5	1409.8	14.5	101.851	Mulder et al. (2017)
K16-salt-2	UA	K16-Salt-2-Spot 170	57	0.434783	1415.4	27.2	1410.9	14.2	1410.9	14.2	100.319	Mulder et al. (2017)
K16-salt-2	UA	K16-Salt-2-Spot 214	122	0.357143	1439.4	23.5	1411.6	10	1411.6	10	101.969	Mulder et al. (2017)
K16-salt-2	UA	K16-Salt-2-Spot 282	81	0.434783	1429.5	26.5	1412.6	11.5	1412.6	11.5	101.196	Mulder et al. (2017)
K16-salt-2	UA	K16-Salt-2-Spot 244	17	0.625	1333.2	60.2	1412.9	22.1	1412.9	22.1	94.3591	Mulder et al. (2017)
K16-salt-2	UA	K16-Salt-2-Spot 120	104	0.434783	1442	30.2	1413.5	11.1	1413.5	11.1	102.016	Mulder et al. (2017)
K16-salt-2	UA	K16-Salt-2-Spot 134	137	0.555556	1428.2	34	1419.9	15.4	1419.9	15.4	100.585	Mulder et al. (2017)
K16-salt-2	UA	K16-Salt-2-Spot 313	105	0.526316	1429.3	31.1	1420.8	10.5	1420.8	10.5	100.598	Mulder et al. (2017)
K16-salt-2	UA	K16-Salt-2-Spot 109	110	0.384615	1430.4	26.9	1421.2	14.4	1421.2	14.4	100.647	Mulder et al. (2017)
K16-salt-2	UA	K16-Salt-2-Spot 9	89	0.833333	1423.6	33	1421.8	12.9	1421.8	12.9	100.127	Mulder et al. (2017)
K16-salt-2	UA	K16-Salt-2-Spot 36	69	0.526316	1423	33.7	1422.3	16.9	1422.3	16.9	100.049	Mulder et al. (2017)
K16-salt-2	UA	K16-Salt-2-Spot 59	158	0.27027	1451	26.7	1423	17.1	1423	17.1	101.968	Mulder et al. (2017)
K16-salt-2	UA	K16-Salt-2-Spot 176	156	0.5	1414.9	22	1423.4	12.6	1423.4	12.6	99.4028	Mulder et al. (2017)
K16-salt-2	UA	K16-Salt-2-Spot 133	121	0.5	1449.9	25.3	1423.8	10.5	1423.8	10.5	101.833	Mulder et al. (2017)
K16-salt-2	UA	K16-Salt-2-Spot 300	57	0.588235	1310	29.9	1425.9	36.8	1425.9	36.8	91.8718	Mulder et al. (2017)
K16-salt-2	UA	K16-Salt-2-Spot 289	75	0.357143	1402.6	28.3	1430.4	14.1	1430.4	14.1	98.0565	Mulder et al. (2017)
K16-salt-2	UA	K16-Salt-2-Spot 306	95	0.434783	1435.3	23.9	1433.1	13.9	1433.1	13.9	100.154	Mulder et al. (2017)
K16-salt-2	UA	K16-Salt-2-Spot 301	98	0.37037	1411.2	25.7	1434	13.6	1434	13.6	98.41	Mulder et al. (2017)
K16-salt-2	UA	K16-Salt-2-Spot 190	88	0.5	1404.1	28.3	1434.7	12.7	1434.7	12.7	97.8671	Mulder et al. (2017)
K16-salt-2	UA	K16-Salt-2-Spot 160	49	0.357143	1426.2	34.5	1435.5	12.5	1435.5	12.5	99.3521	Mulder et al. (2017)
K16-salt-2	UA	K16-Salt-2-Spot 129	91	0.357143	1423.7	25.4	1436.6	12.1	1436.6	12.1	99.102	Mulder et al. (2017)
K16-salt-2	UA	K16-Salt-2-Spot 148	69	0.357143	1434.3	34.4	1439.7	12.9	1439.7	12.9	99.6249	Mulder et al. (2017)
K16-salt-2	UA	K16-Salt-2-Spot 163	63	0.357143	1424.1	26.5	1440.2	16	1440.2	16	98.8821	Mulder et al. (2017)
K16-salt-2	UA	K16-Salt-2-Spot 197	138	0.4	1430	23.9	1440.2	11.6	1440.2	11.6	99.2918	Mulder et al. (2017)
K16-salt-2	UA	K16-Salt-2-Spot 285	106	0.416667	1428.2	31.9	1441.4	11.4	1441.4	11.4	99.0842	Mulder et al. (2017)
K16-salt-2	UA	K16-Salt-2-Spot 43	132	0.4	1458.2	27.9	1442.2	11.5	1442.2	11.5	101.109	Mulder et al. (2017)
K16-salt-2	UA	K16-Salt-2-Spot 241	155	0.416667	1469.4	22.8	1443.8	11	1443.8	11	101.773	Mulder et al. (2017)
K16-salt-2	UA	K16-Salt-2-Spot 245	53	0.384615	1467.6	33.6	1444.1	14.6	1444.1	14.6	101.627	Mulder et al. (2017)
K16-salt-2	UA	K16-Salt-2-Spot 99	136	0.294118	1436.3	28.9	1444.5	14.2	1444.5	14.2	99.4323	Mulder et al. (2017)
K16-salt-2	UA	K16-Salt-2-Spot 136	79	0.833333	1446	34.7	1446	16.1	1446	16.1	100	Mulder et al. (2017)
K16-salt-2	UA	K16-Salt-2-Spot 156	129	0.714286	1393.1	29.8	1448	15	1448	15	96.2086	Mulder et al. (2017)
K16-salt-2	UA	K16-Salt-2-Spot 105	108	0.416667	1415.7	16.7	1450.2	11.2	1450.2	11.2	97.621	Mulder et al. (2017)
K16-salt-2	UA	K16-Salt-2-Spot 116	67	0.454545	1426.2	29.4	1450.4	10.2	1450.4	10.2	98.3315	Mulder et al. (2017)
K16-salt-2	UA	K16-Salt-2-Spot 142	63	0.454545	1427.4	32.6	1452.4	11.9	1452.4	11.9	98.2787	Mulder et al. (2017)
K16-salt-2	UA	K16-Salt-2-Spot 230	108	0.47619	1440.2	28.9	1453.9	16.3	1453.9	16.3	99.0577	Mulder et al. (2017)
K16-salt-2	UA	K16-Salt-2-Spot 90	200	0.714286	1407.5	23.8	1455.1	13.4	1455.1	13.4	96.7287	Mulder et al. (2017)
K16-salt-2	UA	K16-Salt-2-Spot 161	21	0.666667	1329	36.1	1457.7	33.6	1457.7	33.6	91.171	Mulder et al. (2017)
K16-salt-2	UA	K16-Salt-2-Spot 51	167	0.25	1431.3	28.4	1467.8	18.8	1467.8	18.8	97.5133	Mulder et al. (2017)
K16-salt-2	UA	K16-Salt-2-Spot 256	78	1.25	1504.4	31.8	1468.9	13.9	1468.9	13.9	102.417	Mulder et al. (2017)
K16-salt-2	UA	K16-Salt-2-Spot 227	219	0.384615	1348.3	32	1483.8	16.3	1483.8	16.3	90.868	Mulder et al. (2017)
K16-salt-2	UA	K16-Salt-2-Spot 91	135	0.322581	1449.5	26.5	1532.8	16.6	1532.8	16.6	94.5655	Mulder et al. (2017)
K16-salt-2	UA	K16-Salt-2-Spot 299	38	0.434783	1485.9	37	1549.4	11.9	1549.4	11.9	95.9016	Mulder et al. (2017)
K16-salt-2	UA	K16-Salt-2-Spot 251	65	0.588235	1578.2	36.3	1579.5	21.4	1579.5	21.4	99.9177	Mulder et al. (2017)
K16-salt-2	UA	K16-Salt-2-Spot 13	120	0.769231	1669.8	39.8	1620	13.9	1620	13.9	103.074	Mulder et al. (2017)
K16-salt-2	UA	K16-Salt-2-Spot 130	122	0.666667	1671.2	41.6	1624.5	11.9	1624.5	11.9	102.875	Mulder et al. (2017)
K16-salt-2	UA	K16-Salt-2-Spot 263	41	0.666667	1634.4	42.9	1627.4	13.7	1627.4	13.7	100.43	Mulder et al. (2017)
K16-salt-2	UA	K16-Salt-2-Spot 30	51	0.454545	1652.3	42.3	1628.2	13.9	1628.2	13.9	101.48	Mulder et al. (2017)
K16-salt-2	UA	K16-Salt-2-Spot 56	112	0.526316	1660.1	40.5	1629.7	15	1629.7	15	101.865	Mulder et al. (2017)
K16-salt-2	UA	K16-Salt-2-Spot 183	110	0.555556	1627.5	34.2	1630.5	17.3	1630.5	17.3	99.816	Mulder et al. (2017)
K16-salt-2	UA	K16-Salt-2-Spot 98	47	0.434783	1644.7	34.3	1630.8	18.2	1630.8	18.2	100.852	Mulder et al. (2017)
K16-salt-2	UA	K16-Salt-2-Spot 23	93	0.714286	1681.9	42.2	1631.1	15.7	1631.1	15.7	103.114	Mulder et al. (2017)
K16-salt-2	UA	K16-Salt-2-Spot 157	140	0.833333	1648.1	34.1	1631.2	12.2	1631.2	12.2	101.036	Mulder et al. (2017)
K16-salt-2	UA	K16-Salt-2-Spot 123	85	0.434783	1653.6	28.5	1631.6	14.6	1631.6	14.6	101.348	Mulder et al. (2017)
K16-salt-2	UA	K16-Salt-2-Spot 179	84	0.5	1617.9	35.3	1632.9	12.8	1632.9	12.8	99.0814	Mulder et al. (2017)
K16-salt-2	UA	K16-Salt-2-Spot 180	73	0.526316	1679.7	46.5	1632.9	10.5	1632.9	10.5	102.866	Mulder et al. (2017)
K16-salt-2	UA	K16-Salt-2-Spot 106	96	0.909091	1651.9	32	1635.7	11.9	1635.7	11.9	100.99	Mulder et al. (2017)
K16-salt-2	UA	K16-Salt-2-Spot 74	70	0.5	1633.5	32.1	1636.5	15.3	1636.5	15.3	99.8167	Mulder et al. (2017)
K16-salt-2	UA	K16-Salt-2-Spot 314	141	0.434783	1614	24.1	1636.7	10.2	1636.7	10.2	98.6131	Mulder et al. (2017)
K16-salt-2	UA	K16-Salt-2-Spot 315	78	0.416667	1615.3	26.5	1637.2	9.9	1637.2	9.9	98.6624	Mulder et al. (2017)
K16-salt-2	UA	K16-Salt-2-Spot 154	183	0.555556	1664.2	28.3	1637.5	12.1	1637.5	12.1	101.631	Mulder et al. (2017)
K16-salt-2	UA	K16-Salt-2-Spot 242	49	0.4	1640.2	42.6	1637.6	13.4	1637.6	13.4	100.159	Mulder et al. (2017)
K16-salt-2	UA	K16-Salt-2-Spot 66	54	0.5	1624.5	36.3	1638.6	15	1638.6	15	99.1395	Mulder et al. (2017)
K16-salt-2	UA	K16-Salt-2-Spot 100	59	0.625	1639.4	44.2	1639	13.3	1639	13.3	100.024	Mulder et al. (2017)
K16-salt-2	UA	K16-Salt-2-Spot 46	99	0.47619	1633.2	36.3	1639.6	13.6	1639.6	13.6	99.6097	Mulder et al. (2017)
K16-salt-2	UA	K16-Salt-2-Spot 175	67	0.625	1638.4	51.7	1639.9	12.9	1639.9	12.9	99.9085	Mulder et al. (2017)
K16-salt-2	UA	K16-Salt-2-Spot 253	84	0.217391	1585.1	28.1	1640.3	10.7	1640.3	10.7	96.6348	Mulder et al. (2017)
K16-salt-2	UA	K16-Salt-2-Spot 2	81	0.526316	1645.4	29.9	1640.4	12.6	1640.4	12.6	100.305	Mulder et al. (2017)
K16-salt-2	UA	K16-Salt-2-Spot 61	82	0.5	1664.8	28.1	1640.4	12	1640.4	12	101.487	Mulder et al. (2017)
K16-salt-2	UA	K16-Salt-2-Spot 164	103	0.416667	1666.6	24.6	1641.1	12.7	1641.1	12.7	101.554	Mulder et al. (2017)
K16-salt-2	UA	K16-Salt-2-Spot 47	115	0.434783	1622.6	26.2	1641.5	11.8	1641.5	11.8	98.8486	Mulder et al. (2017)
K16-salt-2	UA	K16-Salt-2-Spot 96	92	0.625	1646.7	40.4	1641.7	15	1641.7	15	100.305	Mulder et al. (2017)
K16-salt-2	UA	K16-Salt-2-Spot 87	66	0.526316	1680.6	43.7	1642	11.3	1642	11.3	102.351	Mulder et al. (2017)
K16-salt-2	UA	K16-Salt-2-Spot 185	141	0.526316	1625.5	31.7	1642.2	9.4	1642.2	9.4	98.9831	Mulder et al. (2017)
K16-salt-2	UA	K16-Salt-2-Spot 11	66	0.588235	1664.2	50	1642.7	15.2	1642.7	15.2	101.309	Mulder et al. (2017)
K16-salt-2	UA	K16-Salt-2-Spot 268	63	0.526316	1723.7	37	1642.8	14.5	1642.8	14.5	104.925	Mulder et al. (2017)
K16-salt-2	UA	K16-Salt-2-Spot 272	55	0.434783	1628.1	38.9	1643.2	12.7	1643.2	12.7	99.0811	Mulder et al. (2017)
K16-salt-2	UA	K16-Salt-2-Spot 28	32	0.555556	1640	36.2	1643.9	15	1643.9	15	99.7628	Mulder et al. (2017)
K16-salt-2	UA	K16-Salt-2-Spot 108	63	0.833333	1666.4	34.2	1644.2	10.8	1644.2	10.8	101.35	Mulder et al. (2017)
K16-salt-2	UA	K16-Salt-2-Spot 225	54	0.454545	1670.3	37.8	1644.6	16.3	1644.6	16.3	101.563	Mulder et al. (2017)
K16-salt-2	UA	K16-Salt-2-Spot 177	56	0.555556	1643.6	45	1645	13.7	1645	13.7	99.9149	Mulder et al. (2017)
K16-salt-2	UA	K16-Salt-2-Spot 82	84	0.588235	1625.4	28.4	1645.1	13	1645.1	13	98.8025	Mulder et al. (2017)
K16-salt-2	UA	K16-Salt-2-Spot 208	50	0.454545	1681.2	42.8	1645.4	16	1645.4	16	102.176	Mulder et al. (2017)
K16-salt-2	UA	K16-Salt-2-Spot 167	115	0.909091	1653.7	30.7	1645.9	9.9	1645.9	9.9	100.474	Mulder et al. (2017)
K16-salt-2	UA	K16-Salt-2-Spot 224	20	0.454545	1626.1	69	1646.6	17.3	1646.6	17.3	98.755	Mulder et al. (2017)
K16-salt-2	UA	K16-Salt-2-Spot 8	66	1.25	1632.8	28.2	1646.8	16.6	1646.8	16.6	99.1499	Mulder et al. (2017)
K16-salt-2	UA	K16-Salt-2-Spot 101	162	0.454545	1658.1	36.5	1646.8	10	1646.8	10	100.686	Mulder et al. (2017)
K16-salt-2	UA	K16-Salt-2-Spot 297	96	0.714286	1600.1	28	1648.1	12.8	1648.1	12.8	97.0876	Mulder et al. (2017)
K16-salt-2	UA	K16-Salt-2-Spot 42	64	0.526316	1643.3	33.1	1648.2	14.7	1648.2	14.7	99.7027	Mulder et al. (2017)
K16-salt-2	UA	K16-Salt-2-Spot 221	58	0.588235	1670.5	45.1	1648.9	14.8	1648.9	14.8	101.31	Mulder et al. (2017)
K16-salt-2	UA	K16-Salt-2-Spot 259	145	0.555556	1620.8	34.8	1650.2	12.7	1650.2	12.7	98.2184	Mulder et al. (2017)
K16-salt-2	UA	K16-Salt-2-Spot 223	56	0.588235	1660.5	35.2	1650.2	12.3	1650.2	12.3	100.624	Mulder et al. (2017)
K16-salt-2	UA	K16-Salt-2-Spot 292	62	0.5	1611.8	51.9	1650.3	11.4	1650.3	11.4	97.6671	Mulder et al. (2017)
K16-salt-2	UA	K16-Salt-2-Spot 65	202	0.555556	1663.9	32.8	1650.5	13.1	1650.5	13.1	100.812	Mulder et al. (2017)
K16-salt-2	UA	K16-Salt-2-Spot 195	169	0.5	1525	27.6	1650.6	9.9	1650.6	9.9	92.3906	Mulder et al. (2017)
K16-salt-2	UA	K16-Salt-2-Spot 63	92	0.47619	1611.4	35.7	1651.5	11.3	1651.5	11.3	97.5719	Mulder et al. (2017)
K16-salt-2	UA	K16-Salt-2-Spot 249	101	0.5	1627.6	36	1651.6	11	1651.6	11	98.5469	Mulder et al. (2017)
K16-salt-2	UA	K16-Salt-2-Spot 60	49	0.714286	1633.6	37.6	1653.2	15.8	1653.2	15.8	98.8144	Mulder et al. (2017)
K16-salt-2	UA	K16-Salt-2-Spot 280	110	0.526316	1648	28.1	1655.4	10.9	1655.4	10.9	99.553	Mulder et al. (2017)
K16-salt-2	UA	K16-Salt-2-Spot 265	68	0.555556	1604.9	29.8	1655.6	11.6	1655.6	11.6	96.9377	Mulder et al. (2017)
K16-salt-2	UA	K16-Salt-2-Spot 229	49	0.434783	1695.2	41.3	1655.6	12	1655.6	12	102.392	Mulder et al. (2017)
K16-salt-2	UA	K16-Salt-2-Spot 255	96	0.714286	1648.8	32	1655.8	11.4	1655.8	11.4	99.5772	Mulder et al. (2017)
K16-salt-2	UA	K16-Salt-2-Spot 78	103	0.625	1635.3	30.7	1656.1	11.6	1656.1	11.6	98.744	Mulder et al. (2017)
K16-salt-2	UA	K16-Salt-2-Spot 274	92	0.47619	1646.6	30.5	1656.9	11.8	1656.9	11.8	99.3784	Mulder et al. (2017)
K16-salt-2	UA	K16-Salt-2-Spot 264	68	0.5	1665.7	37.9	1657.9	12.1	1657.9	12.1	100.47	Mulder et al. (2017)
K16-salt-2	UA	K16-Salt-2-Spot 138	82	0.555556	1663	34.1	1659.2	12.7	1659.2	12.7	100.229	Mulder et al. (2017)
K16-salt-2	UA	K16-Salt-2-Spot 53	55	0.666667	1654.3	45.3	1659.7	13.3	1659.7	13.3	99.6746	Mulder et al. (2017)
K16-salt-2	UA	K16-Salt-2-Spot 114	95	0.5	1649.2	28.9	1659.8	11.8	1659.8	11.8	99.3614	Mulder et al. (2017)
K16-salt-2	UA	K16-Salt-2-Spot 281	81	0.625	1552.8	40	1660	13.2	1660	13.2	93.5422	Mulder et al. (2017)
K16-salt-2	UA	K16-Salt-2-Spot 307	47	0.47619	1569.7	35.4	1660.8	14.6	1660.8	14.6	94.5147	Mulder et al. (2017)
K16-salt-2	UA	K16-Salt-2-Spot 308	136	1	1630.6	32	1662.1	11.2	1662.1	11.2	98.1048	Mulder et al. (2017)
K16-salt-2	UA	K16-Salt-2-Spot 231	81	0.625	1675.6	31.1	1663.8	12.9	1663.8	12.9	100.709	Mulder et al. (2017)
K16-salt-2	UA	K16-Salt-2-Spot 295	76	0.434783	1625.6	35.8	1665.3	11.6	1665.3	11.6	97.616	Mulder et al. (2017)
K16-salt-2	UA	K16-Salt-2-Spot 22	69	0.4	1716.8	38.6	1665.6	13	1665.6	13	103.074	Mulder et al. (2017)
K16-salt-2	UA	K16-Salt-2-Spot 127	48	0.4	1651.4	39	1666.1	16.2	1666.1	16.2	99.1177	Mulder et al. (2017)
K16-salt-2	UA	K16-Salt-2-Spot 246	62	0.666667	1598.7	41.9	1666.3	11	1666.3	11	95.9431	Mulder et al. (2017)
K16-salt-2	UA	K16-Salt-2-Spot 67	31	0.555556	1653.4	44.8	1666.7	17.8	1666.7	17.8	99.202	Mulder et al. (2017)
K16-salt-2	UA	K16-Salt-2-Spot 188	123	1	1639.2	31.5	1667	12	1667	12	98.3323	Mulder et al. (2017)
K16-salt-2	UA	K16-Salt-2-Spot 52	31	0.5	1619.8	71.4	1667.6	18.9	1667.6	18.9	97.1336	Mulder et al. (2017)
K16-salt-2	UA	K16-Salt-2-Spot 207	68	0.555556	1622.6	38.2	1667.8	14.4	1667.8	14.4	97.2898	Mulder et al. (2017)
K16-salt-2	UA	K16-Salt-2-Spot 83	199	0.769231	1679.7	30.4	1668.9	11.4	1668.9	11.4	100.647	Mulder et al. (2017)
K16-salt-2	UA	K16-Salt-2-Spot 198	94	0.344828	1654.5	31.6	1669.2	12.6	1669.2	12.6	99.1193	Mulder et al. (2017)
K16-salt-2	UA	K16-Salt-2-Spot 189	93	0.384615	1697.9	31.8	1669.2	12	1669.2	12	101.719	Mulder et al. (2017)
K16-salt-2	UA	K16-Salt-2-Spot 88	78	0.277778	1709.4	39.1	1670	13	1670	13	102.359	Mulder et al. (2017)
K16-salt-2	UA	K16-Salt-2-Spot 275	71	0.555556	1602.7	36.5	1670.2	12.3	1670.2	12.3	95.9586	Mulder et al. (2017)
K16-salt-2	UA	K16-Salt-2-Spot 34	108	0.4	1671.6	41.5	1670.8	15.3	1670.8	15.3	100.048	Mulder et al. (2017)
K16-salt-2	UA	K16-Salt-2-Spot 186	79	0.526316	1697.4	36.4	1670.8	11.5	1670.8	11.5	101.592	Mulder et al. (2017)
K16-salt-2	UA	K16-Salt-2-Spot 64	140	0.357143	1693.6	21.5	1671.2	10	1671.2	10	101.34	Mulder et al. (2017)
K16-salt-2	UA	K16-Salt-2-Spot 236	94	0.416667	1669.5	37.9	1671.6	10.7	1671.6	10.7	99.8744	Mulder et al. (2017)
K16-salt-2	UA	K16-Salt-2-Spot 107	59	0.454545	1668.1	50.6	1672.2	14.9	1672.2	14.9	99.7548	Mulder et al. (2017)
K16-salt-2	UA	K16-Salt-2-Spot 20	101	0.243902	1700.1	33.1	1673	14.3	1673	14.3	101.62	Mulder et al. (2017)
K16-salt-2	UA	K16-Salt-2-Spot 39	157	0.263158	1702.4	32.6	1673	11.5	1673	11.5	101.757	Mulder et al. (2017)
K16-salt-2	UA	K16-Salt-2-Spot 290	124	0.333333	1667.2	26.4	1673.2	11	1673.2	11	99.6414	Mulder et al. (2017)
K16-salt-2	UA	K16-Salt-2-Spot 151	64	0.5	1694.9	36	1673.4	12	1673.4	12	101.285	Mulder et al. (2017)
K16-salt-2	UA	K16-Salt-2-Spot 254	94	0.416667	1697.2	35.5	1673.7	9.8	1673.7	9.8	101.404	Mulder et al. (2017)
K16-salt-2	UA	K16-Salt-2-Spot 194	68	0.454545	1703.3	35.3	1674	13.1	1674	13.1	101.75	Mulder et al. (2017)
K16-salt-2	UA	K16-Salt-2-Spot 273	156	0.344828	1650.6	29.1	1675.3	9	1675.3	9	98.5256	Mulder et al. (2017)
K16-salt-2	UA	K16-Salt-2-Spot 140	93	0.285714	1707.4	33	1676.1	12.2	1676.1	12.2	101.867	Mulder et al. (2017)
K16-salt-2	UA	K16-Salt-2-Spot 110	125	0.5	1494.1	66.2	1676.2	12.9	1676.2	12.9	89.1361	Mulder et al. (2017)
K16-salt-2	UA	K16-Salt-2-Spot 48	44	0.384615	1664.6	44.8	1676.8	19.7	1676.8	19.7	99.2724	Mulder et al. (2017)
K16-salt-2	UA	K16-Salt-2-Spot 279	114	0.555556	1550.5	22.4	1677.3	14.4	1677.3	14.4	92.4402	Mulder et al. (2017)
K16-salt-2	UA	K16-Salt-2-Spot 182	105	0.555556	1657.9	40.1	1678.5	13.6	1678.5	13.6	98.7727	Mulder et al. (2017)
K16-salt-2	UA	K16-Salt-2-Spot 210	86	0.769231	1709.7	34	1678.7	11.1	1678.7	11.1	101.847	Mulder et al. (2017)
K16-salt-2	UA	K16-Salt-2-Spot 165	137	0.434783	1687.4	27.4	1678.9	10.5	1678.9	10.5	100.506	Mulder et al. (2017)
K16-salt-2	UA	K16-Salt-2-Spot 204	24	0.526316	1690.2	58.3	1679.4	18.7	1679.4	18.7	100.643	Mulder et al. (2017)
K16-salt-2	UA	K16-Salt-2-Spot 77	107	0.555556	1678.4	40.2	1679.7	12.4	1679.7	12.4	99.9226	Mulder et al. (2017)
K16-salt-2	UA	K16-Salt-2-Spot 132	91	0.588235	1600.4	38	1679.9	11.6	1679.9	11.6	95.2676	Mulder et al. (2017)
K16-salt-2	UA	K16-Salt-2-Spot 162	101	0.333333	1683.2	37.3	1680.2	11.5	1680.2	11.5	100.179	Mulder et al. (2017)
K16-salt-2	UA	K16-Salt-2-Spot 291	152	0.3125	1676.2	20.9	1680.7	8.4	1680.7	8.4	99.7323	Mulder et al. (2017)
K16-salt-2	UA	K16-Salt-2-Spot 192	268	0.454545	1465.3	26.9	1680.9	11.7	1680.9	11.7	87.1735	Mulder et al. (2017)
K16-salt-2	UA	K16-Salt-2-Spot 50	55	0.322581	1715.9	39.4	1681.3	14.9	1681.3	14.9	102.058	Mulder et al. (2017)
K16-salt-2	UA	K16-Salt-2-Spot 115	110	0.217391	1686.9	36.4	1681.4	12.9	1681.4	12.9	100.327	Mulder et al. (2017)
K16-salt-2	UA	K16-Salt-2-Spot 45	120	0.416667	1682	39.5	1682.2	13.3	1682.2	13.3	99.9881	Mulder et al. (2017)
K16-salt-2	UA	K16-Salt-2-Spot 261	108	0.4	1719.2	31.3	1682.5	10.5	1682.5	10.5	102.181	Mulder et al. (2017)
K16-salt-2	UA	K16-Salt-2-Spot 312	47	0.526316	1660.3	41	1683.5	13.4	1683.5	13.4	98.6219	Mulder et al. (2017)
K16-salt-2	UA	K16-Salt-2-Spot 152	134	0.30303	1680.2	29	1683.8	12.9	1683.8	12.9	99.7862	Mulder et al. (2017)
K16-salt-2	UA	K16-Salt-2-Spot 309	68	0.243902	1704.2	26.2	1683.9	11.2	1683.9	11.2	101.206	Mulder et al. (2017)
K16-salt-2	UA	K16-Salt-2-Spot 149	131	0.555556	1699.8	24.5	1684.2	13.3	1684.2	13.3	100.926	Mulder et al. (2017)
K16-salt-2	UA	K16-Salt-2-Spot 118	76	0.526316	1727.6	30.5	1684.5	12.3	1684.5	12.3	102.559	Mulder et al. (2017)
K16-salt-2	UA	K16-Salt-2-Spot 166	142	0.454545	1718.7	26.9	1684.9	12.2	1684.9	12.2	102.006	Mulder et al. (2017)
K16-salt-2	UA	K16-Salt-2-Spot 119	87	0.5	1678.1	35.1	1685	13.2	1685	13.2	99.5905	Mulder et al. (2017)
K16-salt-2	UA	K16-Salt-2-Spot 305	92	0.222222	1745.2	32.3	1685.1	10.6	1685.1	10.6	103.567	Mulder et al. (2017)
K16-salt-2	UA	K16-Salt-2-Spot 19	47	0.454545	1704.1	49.5	1685.7	14.9	1685.7	14.9	101.092	Mulder et al. (2017)
K16-salt-2	UA	K16-Salt-2-Spot 173	96	0.454545	1691.7	41.7	1686.8	10.7	1686.8	10.7	100.29	Mulder et al. (2017)
K16-salt-2	UA	K16-Salt-2-Spot 73	163	0.333333	1692.9	23.8	1687.4	11.4	1687.4	11.4	100.326	Mulder et al. (2017)
K16-salt-2	UA	K16-Salt-2-Spot 75	97	0.434783	1648.5	35.6	1687.6	12.4	1687.6	12.4	97.6831	Mulder et al. (2017)
K16-salt-2	UA	K16-Salt-2-Spot 113	114	0.47619	1747.6	33.7	1688.8	10.5	1688.8	10.5	103.482	Mulder et al. (2017)
K16-salt-2	UA	K16-Salt-2-Spot 247	60	0.555556	1673.8	34.1	1690.1	10	1690.1	10	99.0356	Mulder et al. (2017)
K16-salt-2	UA	K16-Salt-2-Spot 12	68	0.37037	1692.5	42.1	1690.4	12.8	1690.4	12.8	100.124	Mulder et al. (2017)
K16-salt-2	UA	K16-Salt-2-Spot 16	197	0.263158	1696.5	26.2	1690.4	12.6	1690.4	12.6	100.361	Mulder et al. (2017)
K16-salt-2	UA	K16-Salt-2-Spot 37	24	0.4	1683	56.2	1690.5	16.4	1690.5	16.4	99.5563	Mulder et al. (2017)
K16-salt-2	UA	K16-Salt-2-Spot 38	110	0.25	1718.6	34	1691.4	14.2	1691.4	14.2	101.608	Mulder et al. (2017)
K16-salt-2	UA	K16-Salt-2-Spot 17	128	0.344828	1739.2	29.3	1691.4	13.3	1691.4	13.3	102.826	Mulder et al. (2017)
K16-salt-2	UA	K16-Salt-2-Spot 187	72	0.416667	1727.1	36.3	1692.3	13.9	1692.3	13.9	102.056	Mulder et al. (2017)
K16-salt-2	UA	K16-Salt-2-Spot 235	100	0.30303	1707.4	28.5	1693.2	10.3	1693.2	10.3	100.839	Mulder et al. (2017)
K16-salt-2	UA	K16-Salt-2-Spot 97	87	0.2	1700.6	32	1693.9	10.9	1693.9	10.9	100.396	Mulder et al. (2017)
K16-salt-2	UA	K16-Salt-2-Spot 193	199	0.3125	1675.4	24.9	1694.6	10	1694.6	10	98.867	Mulder et al. (2017)
K16-salt-2	UA	K16-Salt-2-Spot 86	61	0.27027	1702.3	39.5	1694.9	14.2	1694.9	14.2	100.437	Mulder et al. (2017)
K16-salt-2	UA	K16-Salt-2-Spot 84	138	0.25	1733.9	34.4	1695.1	12.2	1695.1	12.2	102.289	Mulder et al. (2017)
K16-salt-2	UA	K16-Salt-2-Spot 111	240	0.25641	1683.9	28	1695.2	10.7	1695.2	10.7	99.3334	Mulder et al. (2017)
K16-salt-2	UA	K16-Salt-2-Spot 302	158	0.217391	1662.7	26.4	1695.3	10.1	1695.3	10.1	98.077	Mulder et al. (2017)
K16-salt-2	UA	K16-Salt-2-Spot 222	120	0.30303	1663.4	35	1695.3	10.9	1695.3	10.9	98.1183	Mulder et al. (2017)
K16-salt-2	UA	K16-Salt-2-Spot 283	98	0.25641	1655	30.6	1695.5	11.3	1695.5	11.3	97.6113	Mulder et al. (2017)
K16-salt-2	UA	K16-Salt-2-Spot 181	84	0.30303	1682.8	37.9	1695.7	11.1	1695.7	11.1	99.2393	Mulder et al. (2017)
K16-salt-2	UA	K16-Salt-2-Spot 174	149	0.285714	1682.3	32.4	1695.9	11.2	1695.9	11.2	99.1981	Mulder et al. (2017)
K16-salt-2	UA	K16-Salt-2-Spot 240	180	0.333333	1719	28.9	1696.4	9	1696.4	9	101.332	Mulder et al. (2017)
K16-salt-2	UA	K16-Salt-2-Spot 144	123	0.30303	1658.9	39	1696.9	13.5	1696.9	13.5	97.7606	Mulder et al. (2017)
K16-salt-2	UA	K16-Salt-2-Spot 216	119	0.434783	1719.7	31.8	1696.9	9.8	1696.9	9.8	101.344	Mulder et al. (2017)
K16-salt-2	UA	K16-Salt-2-Spot 226	88	0.37037	1665.2	25.9	1697.4	11	1697.4	11	98.103	Mulder et al. (2017)
K16-salt-2	UA	K16-Salt-2-Spot 211	119	0.714286	1698.2	37.6	1697.4	10.3	1697.4	10.3	100.047	Mulder et al. (2017)
K16-salt-2	UA	K16-Salt-2-Spot 139	160	0.4	1625.8	28.7	1697.7	12.7	1697.7	12.7	95.7649	Mulder et al. (2017)
K16-salt-2	UA	K16-Salt-2-Spot 248	77	0.434783	1723.1	27.8	1699	13.8	1699	13.8	101.418	Mulder et al. (2017)
K16-salt-2	UA	K16-Salt-2-Spot 150	76	0.384615	1725	23.9	1699	12.6	1699	12.6	101.53	Mulder et al. (2017)
K16-salt-2	UA	K16-Salt-2-Spot 168	164	0.294118	1650.3	22	1699.9	10.5	1699.9	10.5	97.0822	Mulder et al. (2017)
K16-salt-2	UA	K16-Salt-2-Spot 303	109	0.37037	1741.9	25.6	1699.9	8.8	1699.9	8.8	102.471	Mulder et al. (2017)
K16-salt-2	UA	K16-Salt-2-Spot 104	193	0.30303	1699.3	28.9	1701.2	8.9	1701.2	8.9	99.8883	Mulder et al. (2017)
K16-salt-2	UA	K16-Salt-2-Spot 68	104	0.625	1762	37	1702.3	13.5	1702.3	13.5	103.507	Mulder et al. (2017)
K16-salt-2	UA	K16-Salt-2-Spot 18	159	0.30303	1686.2	31	1702.7	13.9	1702.7	13.9	99.031	Mulder et al. (2017)
K16-salt-2	UA	K16-Salt-2-Spot 158	90	0.333333	1704	33.9	1702.7	11.4	1702.7	11.4	100.076	Mulder et al. (2017)
K16-salt-2	UA	K16-Salt-2-Spot 71	80	0.625	1725.1	42.9	1702.9	12.1	1702.9	12.1	101.304	Mulder et al. (2017)
K16-salt-2	UA	K16-Salt-2-Spot 269	95	0.322581	1715.8	40.3	1703.3	11.5	1703.3	11.5	100.734	Mulder et al. (2017)
K16-salt-2	UA	K16-Salt-2-Spot 243	84	0.555556	1682.1	31.8	1703.4	10.4	1703.4	10.4	98.7496	Mulder et al. (2017)
K16-salt-2	UA	K16-Salt-2-Spot 286	123	0.526316	1699.7	28.2	1704.1	10.2	1704.1	10.2	99.7418	Mulder et al. (2017)
K16-salt-2	UA	K16-Salt-2-Spot 276	94	0.434783	1683.9	35	1704.5	12.4	1704.5	12.4	98.7914	Mulder et al. (2017)
K16-salt-2	UA	K16-Salt-2-Spot 217	182	0.277778	1664.3	29	1705.2	9.9	1705.2	9.9	97.6015	Mulder et al. (2017)
K16-salt-2	UA	K16-Salt-2-Spot 260	117	0.434783	1705.6	31.4	1706.7	10.7	1706.7	10.7	99.9355	Mulder et al. (2017)
K16-salt-2	UA	K16-Salt-2-Spot 234	73	0.526316	1708.3	32.7	1707.1	14.6	1707.1	14.6	100.07	Mulder et al. (2017)
K16-salt-2	UA	K16-Salt-2-Spot 239	75	0.526316	1681.8	37.6	1707.7	12.5	1707.7	12.5	98.4833	Mulder et al. (2017)
K16-salt-2	UA	K16-Salt-2-Spot 141	52	0.588235	1628.6	40.3	1708.1	20.5	1708.1	20.5	95.3457	Mulder et al. (2017)
K16-salt-2	UA	K16-Salt-2-Spot 145	129	0.666667	1685	35.4	1708.1	10.5	1708.1	10.5	98.6476	Mulder et al. (2017)
K16-salt-2	UA	K16-Salt-2-Spot 128	55	0.434783	1688.2	26.4	1708.7	13.2	1708.7	13.2	98.8003	Mulder et al. (2017)
K16-salt-2	UA	K16-Salt-2-Spot 288	45	0.344828	1721	45.4	1710.4	13	1710.4	13	100.62	Mulder et al. (2017)
K16-salt-2	UA	K16-Salt-2-Spot 218	205	0.285714	1648.2	23.5	1710.7	11.9	1710.7	11.9	96.3465	Mulder et al. (2017)
K16-salt-2	UA	K16-Salt-2-Spot 200	118	0.384615	1687.7	26.7	1713.4	12.3	1713.4	12.3	98.5001	Mulder et al. (2017)
K16-salt-2	UA	K16-Salt-2-Spot 121	201	0.25641	1688.5	28	1713.8	10.6	1713.8	10.6	98.5237	Mulder et al. (2017)
K16-salt-2	UA	K16-Salt-2-Spot 40	50	0.285714	1678.9	39.1	1715.1	14.8	1715.1	14.8	97.8893	Mulder et al. (2017)
K16-salt-2	UA	K16-Salt-2-Spot 26	97	0.294118	1689.8	31.9	1715.1	13.8	1715.1	13.8	98.5249	Mulder et al. (2017)
K16-salt-2	UA	K16-Salt-2-Spot 153	127	0.555556	1681.4	31.6	1715.8	11.1	1715.8	11.1	97.9951	Mulder et al. (2017)
K16-salt-2	UA	K16-Salt-2-Spot 237	205	0.3125	1703.7	30.1	1716.3	11.8	1716.3	11.8	99.2659	Mulder et al. (2017)
K16-salt-2	UA	K16-Salt-2-Spot 125	61	1.66667	1687.3	40.1	1718.3	11	1718.3	11	98.1959	Mulder et al. (2017)
K16-salt-2	UA	K16-Salt-2-Spot 89	135	0.232558	1733.3	31.5	1719.5	12.6	1719.5	12.6	100.803	Mulder et al. (2017)
K16-salt-2	UA	K16-Salt-2-Spot 44	106	0.243902	1744.6	27.7	1719.8	13.1	1719.8	13.1	101.442	Mulder et al. (2017)
K16-salt-2	UA	K16-Salt-2-Spot 3	245	0.30303	1554.4	45.5	1726	15	1726	15	90.0579	Mulder et al. (2017)
K16-salt-2	UA	K16-Salt-2-Spot 72	110	0.344828	1748.6	35.9	1728.3	11	1728.3	11	101.175	Mulder et al. (2017)
K16-salt-2	UA	K16-Salt-2-Spot 62	66	0.434783	1729.6	26.2	1729.3	12.4	1729.3	12.4	100.017	Mulder et al. (2017)
K16-salt-2	UA	K16-Salt-2-Spot 310	31	0.4	1688.7	51.4	1733	19.1	1733	19.1	97.4437	Mulder et al. (2017)
K16-salt-2	UA	K16-Salt-2-Spot 257	207	0.238095	1623.5	26.9	1733.5	11.4	1733.5	11.4	93.6545	Mulder et al. (2017)
K16-salt-2	UA	K16-Salt-2-Spot 122	190	0.3125	1724.8	33.3	1740.2	10.9	1740.2	10.9	99.115	Mulder et al. (2017)
K16-salt-2	UA	K16-Salt-2-Spot 58	96	0.263158	1760.4	43.3	1742.1	11.7	1742.1	11.7	101.05	Mulder et al. (2017)
K16-salt-2	UA	K16-Salt-2-Spot 1	134	0.232558	1454.9	54	1742.7	17.7	1742.7	17.7	83.4854	Mulder et al. (2017)
K16-salt-2	UA	K16-Salt-2-Spot 304	222	0.555556	1532.2	21.5	1746.4	10.3	1746.4	10.3	87.7348	Mulder et al. (2017)
K16-salt-2	UA	K16-Salt-2-Spot 171	200	0.192308	1779	25.3	1756.7	9.4	1756.7	9.4	101.269	Mulder et al. (2017)
K16-salt-2	UA	K16-Salt-2-Spot 159	141	0.222222	1763.8	36.9	1757.8	10.9	1757.8	10.9	100.341	Mulder et al. (2017)
K16-salt-2	UA	K16-Salt-2-Spot 250	38	0.588235	1727.8	49.3	1762.5	14	1762.5	14	98.0312	Mulder et al. (2017)
K16-salt-2	UA	K16-Salt-2-Spot 131	128	0.172414	1756.4	29.8	1764	11	1764	11	99.5692	Mulder et al. (2017)
K16-salt-2	UA	K16-Salt-2-Spot 21	193	0.285714	1781.2	34.9	1780.5	11.8	1780.5	11.8	100.039	Mulder et al. (2017)
K16-salt-2	UA	K16-Salt-2-Spot 112	149	0.416667	1794.5	36.6	1782.1	11.1	1782.1	11.1	100.696	Mulder et al. (2017)
K16-salt-2	UA	K16-Salt-2-Spot 258	122	0.344828	1762.9	30	1790	11.3	1790	11.3	98.486	Mulder et al. (2017)
K16-salt-2	UA	K16-Salt-2-Spot 79	53	0.625	1632.5	40.9	1790.8	39.6	1790.8	39.6	91.1604	Mulder et al. (2017)
K16-salt-2	UA	K16-Salt-2-Spot 93	209	0.204082	1832	29.2	1793.2	12.3	1793.2	12.3	102.164	Mulder et al. (2017)
K16-salt-2	UA	K16-Salt-2-Spot 220	91	0.526316	1783.8	35.2	1819.7	11.2	1819.7	11.2	98.0271	Mulder et al. (2017)
K16-salt-2	UA	K16-Salt-2-Spot 228	195	0.3125	1839.2	24.2	1829.5	8	1829.5	8	100.53	Mulder et al. (2017)
K16-salt-2	UA	K16-Salt-2-Spot 135	146	0.416667	1871.2	25.8	1853.7	12.1	1853.7	12.1	100.944	Mulder et al. (2017)
K16-salt-2	UA	K16-Salt-2-Spot 85	84	0.47619	1731.1	33	1857.4	54.4	1857.4	54.4	93.2002	Mulder et al. (2017)
K16-salt-2	UA	K16-Salt-2-Spot 69	19	0.833333	1873.7	85.6	1915.9	17.7	1915.9	17.7	97.7974	Mulder et al. (2017)
K16-salt-2	UA	K16-Salt-2-Spot 311	87	0.833333	1893.5	35	1943	10.7	1943	10.7	97.4524	Mulder et al. (2017)
K16-salt-2	UA	K16-Salt-2-Spot 212	66	0.909091	2454.6	50.9	2397	8.5	2397	8.5	102.403	Mulder et al. (2017)
K16-salt-2	UA	K16-Salt-2-Spot 178	103	0.588235	2686.1	50.6	2674.5	7.6	2674.5	7.6	100.434	Mulder et al. (2017)
K16-salt-2	UA	K16-Salt-2-Spot 143	29	1.11111	2705.8	75.4	2682.4	10.7	2682.4	10.7	100.872	Mulder et al. (2017)
K16-salt-2	UA	K16-Salt-2-Spot 196	161	0.666667	2605.6	45.3	2701.5	9	2701.5	9	96.4501	Mulder et al. (2017)
												Mulder et al. (2017)
F03-5-21	UA		107.859	0.597331	1418.08	24.9102	1452.35	20.9359	1452.35	20.9359	97.6404	Mulder et al. (2017)
F03-5-21	UA		270.085	0.654815	1385.06	23.8872	1454.37	9.82885	1454.37	9.82885	95.2347	Mulder et al. (2017)
F03-5-21	UA		17.0684	1.95286	1167.32	48.74	1457.68	142.283	1457.68	142.283	80.0808	Mulder et al. (2017)
F03-5-21	UA		98.1625	0.502343	1481.09	34.7154	1466	24.9386	1466	24.9386	101.029	Mulder et al. (2017)
F03-5-21	UA		207.66	0.553257	1451.6	32.284	1467.71	8.9287	1467.71	8.9287	98.9027	Mulder et al. (2017)
F03-5-21	UA		66.445	0.746466	1398.43	50.7196	1469.1	33.6869	1469.1	33.6869	95.19	Mulder et al. (2017)
F03-5-21	UA		128.413	0.546267	1290.49	224.798	1478.79	29.1721	1478.79	29.1721	87.2668	Mulder et al. (2017)
F03-5-21	UA		32.1367	1.89342	1226.4	45.9117	1483.28	116.806	1483.28	116.806	82.6816	Mulder et al. (2017)
F03-5-21	UA		125.061	0.874715	1244.09	175.01	1484.25	24.0217	1484.25	24.0217	83.8194	Mulder et al. (2017)
F03-5-21	UA		69.3786	0.655941	1399.22	50.6236	1488.6	25.3065	1488.6	25.3065	93.9957	Mulder et al. (2017)
F03-5-21	UA		76.5222	0.766353	1451.97	35.4008	1518.64	16.0484	1518.64	16.0484	95.6101	Mulder et al. (2017)
F03-5-21	UA		95.0003	1.06639	1493.84	17.1851	1611.68	33.4865	1611.68	33.4865	92.6886	Mulder et al. (2017)
F03-5-21	UA		52.3864	0.700332	1508.73	69.7174	1616.25	38.2422	1616.25	38.2422	93.3478	Mulder et al. (2017)
F03-5-21	UA		9.94388	0.684548	1432.7	60.6232	1632.62	107.35	1632.62	107.35	87.7547	Mulder et al. (2017)
F03-5-21	UA		124.013	0.979258	1600.26	42.518	1635.33	14.5431	1635.33	14.5431	97.8557	Mulder et al. (2017)
F03-5-21	UA		44.2903	0.554157	1492.77	84.7355	1637.94	41.9585	1637.94	41.9585	91.1371	Mulder et al. (2017)
F03-5-21	UA		166.76	0.4	1515.83	21.8515	1638.46	19.9722	1638.46	19.9722	92.5152	Mulder et al. (2017)
F03-5-21	UA		137.043	0.720114	1667.69	73.4947	1647.86	14.7661	1647.86	14.7661	101.203	Mulder et al. (2017)
F03-5-21	UA		57.5869	0.845749	1569.02	39.8583	1649.88	28.9596	1649.88	28.9596	95.0993	Mulder et al. (2017)
F03-5-21	UA		73.2457	0.615638	1635.57	25.8134	1676.89	16.8453	1676.89	16.8453	97.5359	Mulder et al. (2017)
F03-5-21	UA		79.1701	0.569569	1531.45	13.7721	1684.77	38.7885	1684.77	38.7885	90.8995	Mulder et al. (2017)
F03-5-21	UA		63.4542	0.888924	1752.9	37.4976	1686.06	37.3146	1686.06	37.3146	103.964	Mulder et al. (2017)
F03-5-21	UA		84.5992	0.497507	1673.31	40.2577	1686.17	14.7418	1686.17	14.7418	99.2373	Mulder et al. (2017)
F03-5-21	UA		28.7077	0.711348	1521.48	20.1085	1687.75	61.3486	1687.75	61.3486	90.1488	Mulder et al. (2017)
F03-5-21	UA		59.8538	0.581455	1649.72	49.0151	1688.17	37.1733	1688.17	37.1733	97.7219	Mulder et al. (2017)
F03-5-21	UA		18.3257	0.566765	1398.76	43.9516	1698.01	103.656	1698.01	103.656	82.3766	Mulder et al. (2017)
F03-5-21	UA		69.2452	0.672434	1669.35	56.2415	1708.88	26.8619	1708.88	26.8619	97.6865	Mulder et al. (2017)
F03-5-21	UA		87.59	0.439291	1739.82	50.7299	1709.93	9.64776	1709.93	9.64776	101.748	Mulder et al. (2017)
F03-5-21	UA		111.612	0.30838	1718.84	44.8085	1713.76	10.0982	1713.76	10.0982	100.296	Mulder et al. (2017)
F03-5-21	UA		48.9384	0.86526	1632.2	48.5595	1728.44	32.3101	1728.44	32.3101	94.4321	Mulder et al. (2017)
F03-5-21	UA		38.5373	1.37577	1699.35	50.6191	1740.63	34.8751	1740.63	34.8751	97.6282	Mulder et al. (2017)
F03-5-21	UA		96.9052	0.647371	1838.31	37.4809	1752.79	13.6535	1752.79	13.6535	104.879	Mulder et al. (2017)
F03-5-21	UA		54.939	0.621256	1837.45	45.4095	1768.86	24.1844	1768.86	24.1844	103.878	Mulder et al. (2017)
F03-5-21	UA		17.659	1.02431	1678.49	40.5637	1817.11	113.404	1817.11	113.404	92.3716	Mulder et al. (2017)
F03-5-21	UA		33.9083	0.656912	1601.44	94.3244	1831	36.1567	1831	36.1567	87.4625	Mulder et al. (2017)
F03-5-21	UA		54.5009	0.565267	2466.46	52.6665	2448.57	13.0701	2448.57	13.0701	100.73	Mulder et al. (2017)
F03-5-21	UA		83.4372	0.735014	2489.21	67.7864	2478.19	4.62897	2478.19	4.62897	100.445	Mulder et al. (2017)
F03-5-21	UA		22.5928	1.07928	2559.95	54.2859	2517.62	14.8798	2517.62	14.8798	101.681	Mulder et al. (2017)
												Mulder et al. (2017)
F03-5-1	UA		107.592	0.717624	1227.19	54.6858	1344.82	72.7699	1344.82	72.7699	91.253	Mulder et al. (2017)
F03-5-1	UA		117.079	0.757196	1367.61	50.695	1361.87	25.52	1361.87	25.52	100.422	Mulder et al. (2017)
F03-5-1	UA		54.6723	0.510886	1409.51	74.9074	1409.59	45.9901	1409.59	45.9901	99.994	Mulder et al. (2017)
F03-5-1	UA		89.7426	1.1367	1365.64	26.9052	1411.99	26.2304	1411.99	26.2304	96.7173	Mulder et al. (2017)
F03-5-1	UA		38.3087	0.855914	1448.17	54.9171	1482.19	61.9383	1482.19	61.9383	97.7048	Mulder et al. (2017)
F03-5-1	UA		55.2057	0.655304	1427.43	66.3731	1487.22	59.399	1487.22	59.399	95.9794	Mulder et al. (2017)
F03-5-1	UA		83.6658	0.661195	1436.3	111.279	1592.7	43.9728	1592.7	43.9728	90.1797	Mulder et al. (2017)
F03-5-1	UA		48.5955	0.351834	1682.51	60.286	1623.35	15.2538	1623.35	15.2538	103.644	Mulder et al. (2017)
F03-5-1	UA		35.8132	0.510426	1635.59	92.3832	1653.17	31.231	1653.17	31.231	98.9366	Mulder et al. (2017)
F03-5-1	UA		40.0803	0.589241	1735.17	39.3044	1657.64	22.01	1657.64	22.01	104.677	Mulder et al. (2017)
F03-5-1	UA		56.7487	0.998465	1698.64	64.7931	1657.85	29.4479	1657.85	29.4479	102.461	Mulder et al. (2017)
F03-5-1	UA		27.5457	1.54072	1714.03	65.3099	1663.06	33.1451	1663.06	33.1451	103.065	Mulder et al. (2017)
F03-5-1	UA		113.04	0.489943	1636.93	45.9542	1680.87	23.0561	1680.87	23.0561	97.3859	Mulder et al. (2017)
F03-5-1	UA		46.1952	0.580423	1722.33	61.8342	1686.07	36.4041	1686.07	36.4041	102.15	Mulder et al. (2017)
F03-5-1	UA		35.6799	1.0184	1660.9	96.3646	1703.27	40.8223	1703.27	40.8223	97.512	Mulder et al. (2017)
F03-5-1	UA		36.1561	0.973163	1547.19	89.2039	1718.25	38.294	1718.25	38.294	90.0443	Mulder et al. (2017)
F03-5-1	UA		61.9874	0.952235	1631.06	22.7425	1721.11	29.9424	1721.11	29.9424	94.7675	Mulder et al. (2017)
F03-5-1	UA		77.608	0.516382	1652.42	35.7112	1741.3	49.6089	1741.3	49.6089	94.8962	Mulder et al. (2017)
F03-5-1	UA		32.9177	0.323292	1700.82	69.8888	1746.22	53.8073	1746.22	53.8073	97.3999	Mulder et al. (2017)
F03-5-1	UA		239.834	0.216932	1853.27	53.0952	1806.94	5.32706	1806.94	5.32706	102.564	Mulder et al. (2017)
Dripping Springs Quartzite	Stanford		48		1049		1232	23	1232	23	85.1461	Stewart et al. (2001)
Dripping Springs Quartzite	Stanford		76		1161		1237	12	1237	12	93.8561	Stewart et al. (2001)
Dripping Springs Quartzite	Stanford		67		1092		1239	18	1239	18	88.1356	Stewart et al. (2001)
Dripping Springs Quartzite	Stanford		48		1033		1245	13	1245	13	82.9719	Stewart et al. (2001)
Dripping Springs Quartzite	Stanford		85		1135		1249	13	1249	13	90.8727	Stewart et al. (2001)
Dripping Springs Quartzite	Stanford		76		1226		1252	10	1252	10	97.9233	Stewart et al. (2001)
Dripping Springs Quartzite	Stanford		70		1165		1253	14	1253	14	92.9769	Stewart et al. (2001)
Dripping Springs Quartzite	Stanford		85		1128		1257	8	1257	8	89.7375	Stewart et al. (2001)
Dripping Springs Quartzite	Stanford		95		1112		1258	8	1258	8	88.3943	Stewart et al. (2001)
Dripping Springs Quartzite	Stanford		148		1124		1258	6	1258	6	89.3482	Stewart et al. (2001)
Dripping Springs Quartzite	Stanford		286		1253		1264	6	1264	6	99.1297	Stewart et al. (2001)
Dripping Springs Quartzite	Stanford		449		1301		1320	5	1320	5	98.5606	Stewart et al. (2001)
Dripping Springs Quartzite	Stanford		345		1311		1325	5	1325	5	98.9434	Stewart et al. (2001)
Dripping Springs Quartzite	Stanford		107		1204		1405	10	1405	10	85.694	Stewart et al. (2001)
Dripping Springs Quartzite	Stanford		888		1153		1432	7	1432	7	80.5168	Stewart et al. (2001)
Dripping Springs Quartzite	Stanford		315		1374		1440	5	1440	5	95.4167	Stewart et al. (2001)
Dripping Springs Quartzite	Stanford		86		1433		1445	8	1445	8	99.1696	Stewart et al. (2001)
Dripping Springs Quartzite	Stanford		419		1541		1700	5	1700	5	90.6471	Stewart et al. (2001)
Dripping Springs Quartzite	Stanford		510		1504		1711	4	1711	4	87.9018	Stewart et al. (2001)
Dripping Springs Quartzite	Stanford		778		1503		1778	5	1778	5	84.5332	Stewart et al. (2001)

## Sheet: Grand Canyon
Sample	Lab	Analysis ID	ppm U	Th/U	6/8 Age	1s	7/6 Age	1s	Best Age	1s	Conc	Data Source
Tapeats 1	UA	Tapeats1-2	518.869	0.627414	1007.9	32.4224	1006.21	71.8513	1006.21	71.8513	100.168	Gehrels et al. (2011)
Tapeats 1	UA	Tapeats1-53	537.979	1.55302	1001.47	33.3691	1053.47	26.1481	1053.47	26.1481	95.0643	Gehrels et al. (2011)
Tapeats 1	UA	Tapeats1-74	127.856	0.836857	1408.71	14.432	1372.38	34.6856	1372.38	34.6856	102.647	Gehrels et al. (2011)
Tapeats 1	UA	Tapeats1-65	163.484	0.829943	1399.9	12.5833	1380.39	23.1068	1380.39	23.1068	101.413	Gehrels et al. (2011)
Tapeats 1	UA	Tapeats1-28	221.376	0.954317	1435.08	32.8313	1406.89	20.0428	1406.89	20.0428	102.004	Gehrels et al. (2011)
Tapeats 1	UA	Tapeats1-39	299.811	0.302592	1415.91	12.8133	1407.28	32.5545	1407.28	32.5545	100.613	Gehrels et al. (2011)
Tapeats 1	UA	Tapeats1-37	291.057	1.14861	1384.63	30.4206	1410.17	26.8308	1410.17	26.8308	98.1887	Gehrels et al. (2011)
Tapeats 1	UA	Tapeats1-35	117.124	0.659888	1474.28	24.6542	1423.6	36.3221	1423.6	36.3221	103.559	Gehrels et al. (2011)
Tapeats 1	UA	Tapeats1-34	179.907	0.710838	1429.97	21.8111	1427.08	29.6035	1427.08	29.6035	100.203	Gehrels et al. (2011)
Tapeats 1	UA	Tapeats1-48	216.703	0.778185	1434.96	35.9871	1430.33	26.7646	1430.33	26.7646	100.324	Gehrels et al. (2011)
Tapeats 1	UA	Tapeats1-21	100.776	0.224208	1434.75	14.4028	1431.67	39.418	1431.67	39.418	100.215	Gehrels et al. (2011)
Tapeats 1	UA	Tapeats1-78	130.815	0.646513	1451.38	28.2953	1434.3	49.234	1434.3	49.234	101.191	Gehrels et al. (2011)
Tapeats 1	UA	Tapeats1-91	140.643	0.719498	1450.89	15.6217	1434.71	36.0591	1434.71	36.0591	101.128	Gehrels et al. (2011)
Tapeats 1	UA	Tapeats1-61	180.529	0.71627	1446.13	12.9541	1442.51	26.6812	1442.51	26.6812	100.251	Gehrels et al. (2011)
Tapeats 1	UA	Tapeats1-30	367.984	1.04815	1243.81	69.9401	1443.83	24.7865	1443.83	24.7865	86.1463	Gehrels et al. (2011)
Tapeats 1	UA	Tapeats1-97	274.2	0.72543	1439.2	28.4897	1445.2	43.6323	1445.2	43.6323	99.5851	Gehrels et al. (2011)
Tapeats 1	UA	Tapeats1-103	177.146	0.748904	1392.62	20.6374	1447.45	26.6632	1447.45	26.6632	96.2116	Gehrels et al. (2011)
Tapeats 1	UA	Tapeats1-99	183.215	0.895572	1450.53	16.0833	1447.95	43.2416	1447.95	43.2416	100.178	Gehrels et al. (2011)
Tapeats 1	UA	Tapeats1-92	268.424	0.643083	1460.56	28.2894	1448.67	38.2767	1448.67	38.2767	100.821	Gehrels et al. (2011)
Tapeats 1	UA	Tapeats1-102	88.4695	1.17147	1466.82	27.1264	1451.08	44.5913	1451.08	44.5913	101.085	Gehrels et al. (2011)
Tapeats 1	UA	Tapeats1-100	181.113	0.871396	1432.05	16.6001	1451.9	24.7424	1451.9	24.7424	98.6326	Gehrels et al. (2011)
Tapeats 1	UA	Tapeats1-1	200.986	0.642518	1416.22	31.1368	1453.25	51.5808	1453.25	51.5808	97.4516	Gehrels et al. (2011)
Tapeats 1	UA	Tapeats1-98	94.7545	1.05533	1487.8	32.3415	1455.14	44.3274	1455.14	44.3274	102.244	Gehrels et al. (2011)
Tapeats 1	UA	Tapeats1-87	226.7	0.515912	1452.96	25.678	1456.75	28.531	1456.75	28.531	99.7399	Gehrels et al. (2011)
Tapeats 1	UA	Tapeats1-32	239.393	0.534443	1459.66	13.0621	1460.39	19.0119	1460.39	19.0119	99.9506	Gehrels et al. (2011)
Tapeats 1	UA	Tapeats1-11	86.3306	1.32641	1459.25	13.0588	1460.47	22.107	1460.47	22.107	99.9167	Gehrels et al. (2011)
Tapeats 1	UA	Tapeats1-57	321.398	0.978728	1380.31	61.6777	1462.73	34.2165	1462.73	34.2165	94.3653	Gehrels et al. (2011)
Tapeats 1	UA	Tapeats1-56	142.32	1.05893	1467.29	13.1229	1467.14	34.2134	1467.14	34.2134	100.01	Gehrels et al. (2011)
Tapeats 1	UA	Tapeats1-10	165.067	0.342378	1444.43	15.7542	1468.93	20.9015	1468.93	20.9015	98.3322	Gehrels et al. (2011)
Tapeats 1	UA	Tapeats1-73	580.701	0.67126	1257.48	66.0143	1475.86	31.1789	1475.86	31.1789	85.2032	Gehrels et al. (2011)
Tapeats 1	UA	Tapeats1-5	388.101	1.25119	1475.82	18.9738	1479.63	44.7515	1479.63	44.7515	99.7425	Gehrels et al. (2011)
Tapeats 1	UA	Tapeats1-67	233.579	0.535806	1487.93	16.0082	1479.87	18.9743	1479.87	18.9743	100.545	Gehrels et al. (2011)
Tapeats 1	UA	Tapeats1-3	157.962	1.29276	1227.17	42.2334	1488.17	34.1113	1488.17	34.1113	82.4618	Gehrels et al. (2011)
Tapeats 1	UA	Tapeats1-50	255.128	1.03575	1291.4	32.1351	1491.33	30.2923	1491.33	30.2923	86.5938	Gehrels et al. (2011)
Tapeats 1	UA	Tapeats1-49	399.22	0.786086	1252.48	41.1753	1529.52	32.1143	1529.52	32.1143	81.8871	Gehrels et al. (2011)
Tapeats 1	UA	Tapeats1-6	136.959	0.636627	1477.38	13.2032	1564.65	20.9944	1564.65	20.9944	94.4227	Gehrels et al. (2011)
Tapeats 1	UA	Tapeats1-22	163.917	0.917676	1660.44	19.9777	1645.14	31.545	1645.14	31.545	100.93	Gehrels et al. (2011)
Tapeats 1	UA	Tapeats1-85	175.695	0.594742	1598.81	49.3974	1650.09	29.4828	1650.09	29.4828	96.8922	Gehrels et al. (2011)
Tapeats 1	UA	Tapeats1-51	327.212	0.533458	1483.93	29.5788	1654.37	40.0269	1654.37	40.0269	89.6978	Gehrels et al. (2011)
Tapeats 1	UA	Tapeats1-16	94.5472	0.58992	1550.52	29.0361	1662.78	25.9542	1662.78	25.9542	93.249	Gehrels et al. (2011)
Tapeats 1	UA	Tapeats1-19	123.531	0.917297	1649.95	54.1935	1667.66	35.1536	1667.66	35.1536	98.9381	Gehrels et al. (2011)
Tapeats 1	UA	Tapeats1-9	243.152	0.380357	1703.71	28.982	1670.54	20.3519	1670.54	20.3519	101.986	Gehrels et al. (2011)
Tapeats 1	UA	Tapeats1-27	125.152	0.679859	1686.55	21.2233	1678.31	33.63	1678.31	33.63	100.491	Gehrels et al. (2011)
Tapeats 1	UA	Tapeats1-55	150.028	0.853924	1578.13	15.5943	1685.37	23.638	1685.37	23.638	93.6369	Gehrels et al. (2011)
Tapeats 1	UA	Tapeats1-90	132.172	0.866372	1672.23	33.2671	1689.9	42.8909	1689.9	42.8909	98.9546	Gehrels et al. (2011)
Tapeats 1	UA	Tapeats1-84	146.56	0.540553	1659.23	26.946	1690.42	51.3149	1690.42	51.3149	98.155	Gehrels et al. (2011)
Tapeats 1	UA	Tapeats1-68	174.244	0.307033	1698.45	16.2862	1694.82	29.5017	1694.82	29.5017	100.215	Gehrels et al. (2011)
Tapeats 1	UA	Tapeats1-15	172.162	0.645957	1684.9	26.0528	1695.11	39.4544	1695.11	39.4544	99.3978	Gehrels et al. (2011)
Tapeats 1	UA	Tapeats1-93	237.31	0.446559	1697.49	26.2558	1695.33	36.1363	1695.33	36.1363	100.128	Gehrels et al. (2011)
Tapeats 1	UA	Tapeats1-13	145.646	0.819045	1638.06	37.7434	1697.59	29.5131	1697.59	29.5131	96.4933	Gehrels et al. (2011)
Tapeats 1	UA	Tapeats1-105	243.426	0.564166	1710.65	23.0345	1697.73	22.6671	1697.73	22.6671	100.761	Gehrels et al. (2011)
Tapeats 1	UA	Tapeats1-69	132.7	0.644622	1706.17	23.1153	1701.48	21.0206	1701.48	21.0206	100.276	Gehrels et al. (2011)
Tapeats 1	UA	Tapeats1-79	183.092	0.816594	1705.83	20.4736	1703.85	24.6812	1703.85	24.6812	100.116	Gehrels et al. (2011)
Tapeats 1	UA	Tapeats1-59	155.013	0.534577	1716.48	18.183	1703.87	36.8351	1703.87	36.8351	100.74	Gehrels et al. (2011)
Tapeats 1	UA	Tapeats1-8	178.852	0.825771	1640.29	33.3632	1704.74	34.44	1704.74	34.44	96.2191	Gehrels et al. (2011)
Tapeats 1	UA	Tapeats1-75	165.556	0.711607	1752.9	29.5278	1705.21	20.2541	1705.21	20.2541	102.797	Gehrels et al. (2011)
Tapeats 1	UA	Tapeats1-14	112.083	0.845456	1683.13	45.3735	1705.57	44.226	1705.57	44.226	98.6846	Gehrels et al. (2011)
Tapeats 1	UA	Tapeats1-46	140.841	0.868408	1639.67	38.0855	1707.25	36.6488	1707.25	36.6488	96.0419	Gehrels et al. (2011)
Tapeats 1	UA	Tapeats1-76	151.046	0.981557	1477.21	30.6863	1708.04	33.1903	1708.04	33.1903	86.4859	Gehrels et al. (2011)
Tapeats 1	UA	Tapeats1-82	123.673	0.948462	1591.57	30.148	1710.18	41.0648	1710.18	41.0648	93.0644	Gehrels et al. (2011)
Tapeats 1	UA	Tapeats1-26	98.2786	1.08524	1660.51	23.9161	1711.56	35.4335	1711.56	35.4335	97.0175	Gehrels et al. (2011)
Tapeats 1	UA	Tapeats1-20	147.097	0.723523	1714.55	52.0569	1711.97	31.3664	1711.97	31.3664	100.15	Gehrels et al. (2011)
Tapeats 1	UA	Tapeats1-29	114.335	0.846226	1741.04	15.2574	1716.42	28.8802	1716.42	28.8802	101.434	Gehrels et al. (2011)
Tapeats 1	UA	Tapeats1-70	426.48	0.621608	1660.67	32.0694	1716.7	28.0432	1716.7	28.0432	96.7358	Gehrels et al. (2011)
Tapeats 1	UA	Tapeats1-77	135.828	1.22184	1740.63	36.6374	1719.21	45.9578	1719.21	45.9578	101.246	Gehrels et al. (2011)
Tapeats 1	UA	Tapeats1-94	179.888	0.810573	1704.37	37.4276	1719.74	46.8939	1719.74	46.8939	99.1061	Gehrels et al. (2011)
Tapeats 1	UA	Tapeats1-88	204.943	0.586789	1697.47	29.513	1720.03	29.4051	1720.03	29.4051	98.6882	Gehrels et al. (2011)
Tapeats 1	UA	Tapeats1-71	204.482	0.529386	1703.8	17.2445	1722.58	53.3793	1722.58	53.3793	98.9095	Gehrels et al. (2011)
Tapeats 1	UA	Tapeats1-7	124.426	0.729107	1404.93	24.018	1723.59	51.2609	1723.59	51.2609	81.5119	Gehrels et al. (2011)
Tapeats 1	UA	Tapeats1-62	412.779	0.612596	1593.46	28.0708	1725.12	26.5387	1725.12	26.5387	92.3684	Gehrels et al. (2011)
Tapeats 1	UA	Tapeats1-45	108.521	1.07092	1689.4	16.4963	1726.41	52.5233	1726.41	52.5233	97.8563	Gehrels et al. (2011)
Tapeats 1	UA	Tapeats1-4	358.476	0.319118	1746.56	18.4701	1728.43	43.5099	1728.43	43.5099	101.049	Gehrels et al. (2011)
Tapeats 1	UA	Tapeats1-86	94.1514	0.828756	1712.4	40.2585	1728.75	34.9035	1728.75	34.9035	99.0544	Gehrels et al. (2011)
Tapeats 1	UA	Tapeats1-89	132.36	0.503088	1747.99	40.4445	1730.42	40.0393	1730.42	40.0393	101.016	Gehrels et al. (2011)
Tapeats 1	UA	Tapeats1-42	137.27	0.552677	1751.95	18.9956	1730.76	35.4291	1730.76	35.4291	101.225	Gehrels et al. (2011)
Tapeats 1	UA	Tapeats1-47	139.88	0.7279	1707.79	15.003	1733.04	43.3279	1733.04	43.3279	98.5434	Gehrels et al. (2011)
Tapeats 1	UA	Tapeats1-43	137.241	0.711205	1689.69	16.4636	1733.59	31.5569	1733.59	31.5569	97.4674	Gehrels et al. (2011)
Tapeats 1	UA	Tapeats1-96	181.151	0.488546	1736.42	24.0147	1734.51	24.5816	1734.51	24.5816	100.11	Gehrels et al. (2011)
Tapeats 1	UA	Tapeats1-104	196.943	0.384638	1742.66	15.2698	1735.48	58.7028	1735.48	58.7028	100.414	Gehrels et al. (2011)
Tapeats 1	UA	Tapeats1-52	159.988	0.861951	1648.02	48.9767	1736.49	39.2467	1736.49	39.2467	94.905	Gehrels et al. (2011)
Tapeats 1	UA	Tapeats1-80	222.894	0.331686	1731.45	23.4725	1738.13	31.54	1738.13	31.54	99.6158	Gehrels et al. (2011)
Tapeats 1	UA	Tapeats1-83	76.7383	1.38023	1747.32	15.3054	1738.5	45.6714	1738.5	45.6714	100.508	Gehrels et al. (2011)
Tapeats 1	UA	Tapeats1-40	406.457	0.357621	1733.21	15.6096	1750.85	18.3191	1750.85	18.3191	98.9922	Gehrels et al. (2011)
Tapeats 1	UA	Tapeats1-72	163.823	0.709063	1763.84	26.8101	1752.87	22.6932	1752.87	22.6932	100.626	Gehrels et al. (2011)
Tapeats 1	UA	Tapeats1-31	232.844	0.352221	1748.02	15.3107	1754.21	34.7664	1754.21	34.7664	99.6469	Gehrels et al. (2011)
Tapeats 1	UA	Tapeats1-54	289.446	0.708259	1707.55	15.0011	1755.59	23.781	1755.59	23.781	97.2637	Gehrels et al. (2011)
Tapeats 1	UA	Tapeats1-38	132.737	0.371742	1708.78	21.7442	1759.27	33.6506	1759.27	33.6506	97.13	Gehrels et al. (2011)
Tapeats 1	UA	Tapeats1-81	442.941	0.747812	1687.58	31.7411	1765.68	23.9574	1765.68	23.9574	95.5765	Gehrels et al. (2011)
Tapeats 1	UA	Tapeats1-64	396.949	0.586414	1705.51	31.4606	1770.5	18.4874	1770.5	18.4874	96.3292	Gehrels et al. (2011)
Tapeats 1	UA	Tapeats1-44	155.323	0.426513	1786.52	19.774	1776.45	22.4497	1776.45	22.4497	100.567	Gehrels et al. (2011)
Tapeats 1	UA	Tapeats1-41	213.876	0.251204	1775.95	15.5232	1781.64	18.2409	1781.64	18.2409	99.6809	Gehrels et al. (2011)
Tapeats 1	UA	Tapeats1-17	220.293	0.877112	1807.63	55.3516	1796.52	40.7765	1796.52	40.7765	100.619	Gehrels et al. (2011)
Tapeats 1	UA	Tapeats1-33	329.945	0.524728	1804.33	42.1671	1821.44	39.6746	1821.44	39.6746	99.0607	Gehrels et al. (2011)
Tapeats 1	UA	Tapeats1-101	215.591	0.359289	1862.27	50.264	1829.6	19.9509	1829.6	19.9509	101.786	Gehrels et al. (2011)
Tapeats 1	UA	Tapeats1-66	1145.68	0.262292	1824.39	33.3622	1849.47	20.0941	1849.47	20.0941	98.6444	Gehrels et al. (2011)
Tapeats 1	UA	Tapeats1-18	160.638	0.498142	1928.28	42.6555	1864.34	21.666	1864.34	21.666	103.429	Gehrels et al. (2011)
Tapeats 2	UA	Tapeats2-43	308.446	0.784445	936.842	9.41714	1048.52	49.6796	1048.52	49.6796	89.3494	Gehrels et al. (2011)
Tapeats 2	UA	Tapeats2-58	35.3986	1.67592	1021.44	27.9614	1052.66	44.4552	1052.66	44.4552	97.0346	Gehrels et al. (2011)
Tapeats 2	UA	Tapeats2-64	303.277	0.274872	993.462	13.9946	1063.81	39.6493	1063.81	39.6493	93.3875	Gehrels et al. (2011)
Tapeats 2	UA	Tapeats2-46	156.297	1.6626	1057.11	10.14	1091.28	47.7134	1091.28	47.7134	96.8688	Gehrels et al. (2011)
Tapeats 2	UA	Tapeats2-27	170.648	0.727725	1065.71	10.7069	1102.82	50.4757	1102.82	50.4757	96.6346	Gehrels et al. (2011)
Tapeats 2	UA	Tapeats2-35	248.874	0.797176	1091.38	19.3772	1107.07	36.9171	1107.07	36.9171	98.5825	Gehrels et al. (2011)
Tapeats 2	UA	Tapeats2-5	19.2314	0.564155	1238.6	16.2271	1203.71	54.1104	1203.71	54.1104	102.898	Gehrels et al. (2011)
Tapeats 2	UA	Tapeats2-24	141.832	1.17795	1234.24	17.7478	1352.29	39.2216	1352.29	39.2216	91.2702	Gehrels et al. (2011)
Tapeats 2	UA	Tapeats2-44	82.559	0.493139	1417	23.6607	1419.12	65.5865	1419.12	65.5865	99.8508	Gehrels et al. (2011)
Tapeats 2	UA	Tapeats2-26	98.5611	0.385462	1443.31	44.6144	1421.32	51.4852	1421.32	51.4852	101.547	Gehrels et al. (2011)
Tapeats 2	UA	Tapeats2-48	240.022	0.276616	1416.57	14.1162	1423.03	27.9265	1423.03	27.9265	99.5462	Gehrels et al. (2011)
Tapeats 2	UA	Tapeats2-76	235.678	0.71161	1406.74	16.3034	1427.18	29.4134	1427.18	29.4134	98.5679	Gehrels et al. (2011)
Tapeats 2	UA	Tapeats2-40	70.6219	0.691585	1404.53	17.0378	1430.46	49.7439	1430.46	49.7439	98.1871	Gehrels et al. (2011)
Tapeats 2	UA	Tapeats2-47	298.985	0.199583	1405.79	15.9147	1431.34	37.9869	1431.34	37.9869	98.2148	Gehrels et al. (2011)
Tapeats 2	UA	Tapeats2-11	281.58	0.450565	1440.18	12.9067	1436.35	34.9916	1436.35	34.9916	100.267	Gehrels et al. (2011)
Tapeats 2	UA	Tapeats2-36	77.9884	1.09888	1437	15.8438	1436.59	54.0499	1436.59	54.0499	100.028	Gehrels et al. (2011)
Tapeats 2	UA	Tapeats2-21	647.534	0.643154	1326.95	26.5046	1436.84	35.858	1436.84	35.858	92.3523	Gehrels et al. (2011)
Tapeats 2	UA	Tapeats2-91	173.63	0.45855	1443.15	12.9303	1439.51	39.4891	1439.51	39.4891	100.253	Gehrels et al. (2011)
Tapeats 2	UA	Tapeats2-60	153.48	0.299183	1433.53	18.2517	1440.11	34.542	1440.11	34.542	99.5435	Gehrels et al. (2011)
Tapeats 2	UA	Tapeats2-62	310.128	0.758929	1425.54	18.1608	1442.36	32.5979	1442.36	32.5979	98.8339	Gehrels et al. (2011)
Tapeats 2	UA	Tapeats2-68	261.708	0.733375	1421.7	17.0964	1442.43	29.7385	1442.43	29.7385	98.563	Gehrels et al. (2011)
Tapeats 2	UA	Tapeats2-4	233.676	0.886618	1340.48	26.2635	1442.46	48.4682	1442.46	48.4682	92.9303	Gehrels et al. (2011)
Tapeats 2	UA	Tapeats2-105	203.467	0.545619	1458.98	13.0567	1444.25	53.7402	1444.25	53.7402	101.02	Gehrels et al. (2011)
Tapeats 2	UA	Tapeats2-108	91.5454	1.14624	1428.58	12.814	1444.6	28.3836	1444.6	28.3836	98.8916	Gehrels et al. (2011)
Tapeats 2	UA	Tapeats2-95	277.329	0.820892	1421.67	34.8302	1444.82	39.0815	1444.82	39.0815	98.3977	Gehrels et al. (2011)
Tapeats 2	UA	Tapeats2-37	174.331	0.593223	1381.07	19.1446	1444.99	39.0984	1444.99	39.0984	95.5764	Gehrels et al. (2011)
Tapeats 2	UA	Tapeats2-63	154.233	1.15406	1435.01	16.3388	1447.22	46.9853	1447.22	46.9853	99.1564	Gehrels et al. (2011)
Tapeats 2	UA	Tapeats2-6	195.843	0.77167	1415.19	35.1965	1447.41	23.5206	1447.41	23.5206	97.7735	Gehrels et al. (2011)
Tapeats 2	UA	Tapeats2-103	118.257	0.201871	1418.19	12.7303	1447.73	45.7397	1447.73	45.7397	97.9596	Gehrels et al. (2011)
Tapeats 2	UA	Tapeats2-55	110.302	0.821668	1400.05	12.5846	1449.59	54.7127	1449.59	54.7127	96.5827	Gehrels et al. (2011)
Tapeats 2	UA	Tapeats2-45	140.16	0.385345	1423.11	32.6908	1450.69	33.1583	1450.69	33.1583	98.0987	Gehrels et al. (2011)
Tapeats 2	UA	Tapeats2-56	223.916	0.686424	1418.34	33.1021	1451.62	43.0223	1451.62	43.0223	97.7072	Gehrels et al. (2011)
Tapeats 2	UA	Tapeats2-99	97.3334	1.02798	1396.55	28.3778	1453.27	45.012	1453.27	45.012	96.0976	Gehrels et al. (2011)
Tapeats 2	UA	Tapeats2-88	42.1565	0.145283	1442.75	37.8768	1455.27	31.3428	1455.27	31.3428	99.1401	Gehrels et al. (2011)
Tapeats 2	UA	Tapeats2-84	119.206	0.59129	1436.54	13.0061	1455.61	45.6669	1455.61	45.6669	98.6901	Gehrels et al. (2011)
Tapeats 2	UA	Tapeats2-71	91.2874	0.686889	1460.74	17.5147	1456.33	28.1848	1456.33	28.1848	100.303	Gehrels et al. (2011)
Tapeats 2	UA	Tapeats2-61	119.691	0.65024	1416.41	12.716	1456.36	38.8563	1456.36	38.8563	97.2568	Gehrels et al. (2011)
Tapeats 2	UA	Tapeats2-96	252.928	0.435383	1431.89	19.2602	1458.04	26.14	1458.04	26.14	98.2062	Gehrels et al. (2011)
Tapeats 2	UA	Tapeats2-100	339.243	0.771864	1417.28	28.8813	1458.39	19.0361	1458.39	19.0361	97.1807	Gehrels et al. (2011)
Tapeats 2	UA	Tapeats2-15	101.419	0.610346	1427.82	48.7976	1459.35	33.1659	1459.35	33.1659	97.8397	Gehrels et al. (2011)
Tapeats 2	UA	Tapeats2-66	140.934	0.549118	1448.17	33.334	1459.36	45.27	1459.36	45.27	99.2332	Gehrels et al. (2011)
Tapeats 2	UA	Tapeats2-25	104.886	0.59592	1414.09	22.2205	1461.31	35.0344	1461.31	35.0344	96.7683	Gehrels et al. (2011)
Tapeats 2	UA	Tapeats2-20	513.946	0.23104	1442.26	20.677	1463.81	19.0262	1463.81	19.0262	98.5278	Gehrels et al. (2011)
Tapeats 2	UA	Tapeats2-81	98.0246	1.01831	1443.12	17.3262	1467.56	36.122	1467.56	36.122	98.335	Gehrels et al. (2011)
Tapeats 2	UA	Tapeats2-85	58.6435	0.49242	1563.74	21.1058	1619.58	33.7526	1619.58	33.7526	96.5522	Gehrels et al. (2011)
Tapeats 2	UA	Tapeats2-23	196.524	0.490358	1544.37	42.8479	1625.93	29.0249	1625.93	29.0249	94.984	Gehrels et al. (2011)
Tapeats 2	UA	Tapeats2-7	36.6677	0.872719	1574	26.6749	1649.49	42.6159	1649.49	42.6159	95.4236	Gehrels et al. (2011)
Tapeats 2	UA	Tapeats2-16	194.832	1.25548	1644.16	16.2541	1652.52	48.7125	1652.52	48.7125	99.4941	Gehrels et al. (2011)
Tapeats 2	UA	Tapeats2-50	180.697	0.408471	1640.29	15.9309	1665.64	37.7719	1665.64	37.7719	98.4779	Gehrels et al. (2011)
Tapeats 2	UA	Tapeats2-2	85.3653	0.383211	1688.13	14.852	1666.08	32.1235	1666.08	32.1235	101.323	Gehrels et al. (2011)
Tapeats 2	UA	Tapeats2-97	127.78	0.66454	1651.33	25.3482	1667.49	23.1657	1667.49	23.1657	99.0311	Gehrels et al. (2011)
Tapeats 2	UA	Tapeats2-92	185.876	0.406916	1658.83	24.279	1670.29	36.6296	1670.29	36.6296	99.3139	Gehrels et al. (2011)
Tapeats 2	UA	Tapeats2-34	168.151	0.420264	1679.87	30.464	1670.93	38.6748	1670.93	38.6748	100.535	Gehrels et al. (2011)
Tapeats 2	UA	Tapeats2-109	70.6941	0.816188	1522.62	13.5617	1671.64	48.963	1671.64	48.963	91.0854	Gehrels et al. (2011)
Tapeats 2	UA	Tapeats2-39	273.305	0.59085	1635.06	28.0172	1672.4	34.5933	1672.4	34.5933	97.7674	Gehrels et al. (2011)
Tapeats 2	UA	Tapeats2-32	119.299	0.650234	1674.87	23.7472	1674.5	23.5194	1674.5	23.5194	100.023	Gehrels et al. (2011)
Tapeats 2	UA	Tapeats2-77	80.0003	0.42512	1684.86	14.8268	1677.36	27.8604	1677.36	27.8604	100.447	Gehrels et al. (2011)
Tapeats 2	UA	Tapeats2-1	36.3994	0.530401	1673.82	22.7022	1677.82	44.0351	1677.82	44.0351	99.7617	Gehrels et al. (2011)
Tapeats 2	UA	Tapeats2-98	158.092	0.606097	1672.08	14.7282	1682.47	40.4497	1682.47	40.4497	99.3821	Gehrels et al. (2011)
Tapeats 2	UA	Tapeats2-70	39.2057	0.715126	1683.75	28.0066	1682.59	39.1507	1682.59	39.1507	100.069	Gehrels et al. (2011)
Tapeats 2	UA	Tapeats2-75	168.667	0.603182	1675.1	30.9785	1683.29	18.496	1683.29	18.496	99.5139	Gehrels et al. (2011)
Tapeats 2	UA	Tapeats2-78	118.7	0.582113	1587.73	37.7164	1689.47	35.9897	1689.47	35.9897	93.978	Gehrels et al. (2011)
Tapeats 2	UA	Tapeats2-57	221.554	0.694156	1668.52	14.7008	1698.09	30.2543	1698.09	30.2543	98.2587	Gehrels et al. (2011)
Tapeats 2	UA	Tapeats2-79	107.486	0.285485	1661.83	27.98	1698.3	29.4868	1698.3	29.4868	97.8524	Gehrels et al. (2011)
Tapeats 2	UA	Tapeats2-52	119.289	0.445878	1690.31	25.7229	1701.23	56.3975	1701.23	56.3975	99.3583	Gehrels et al. (2011)
Tapeats 2	UA	Tapeats2-80	294.404	1.54973	1719.39	26.8651	1709.61	43.0839	1709.61	43.0839	100.572	Gehrels et al. (2011)
Tapeats 2	UA	Tapeats2-73	187.207	0.384412	1695.44	40.8488	1711.74	39.7583	1711.74	39.7583	99.048	Gehrels et al. (2011)
Tapeats 2	UA	Tapeats2-28	92.6803	0.544918	1626.76	27.7484	1712.23	39.2195	1712.23	39.2195	95.0084	Gehrels et al. (2011)
Tapeats 2	UA	Tapeats2-65	123.869	0.599257	1707.66	25.6535	1714.98	34.0543	1714.98	34.0543	99.5735	Gehrels et al. (2011)
Tapeats 2	UA	Tapeats2-90	296.633	0.598079	1694.11	26.9653	1718.05	28.325	1718.05	28.325	98.6063	Gehrels et al. (2011)
Tapeats 2	UA	Tapeats2-3	56.2808	0.631547	1704.39	35.4955	1720.3	47.8193	1720.3	47.8193	99.0749	Gehrels et al. (2011)
Tapeats 2	UA	Tapeats2-89	130.411	0.218912	1703.79	19.0148	1731.13	50.3067	1731.13	50.3067	98.4209	Gehrels et al. (2011)
Tapeats 2	UA	Tapeats2-72	251.154	0.397951	1677.17	25.4002	1731.75	24.6024	1731.75	24.6024	96.8484	Gehrels et al. (2011)
Tapeats 2	UA	Tapeats2-49	86.851	0.294006	1740.5	15.2538	1732.96	21.6383	1732.96	21.6383	100.435	Gehrels et al. (2011)
Tapeats 2	UA	Tapeats2-30	202.704	0.296905	1717.29	15.0758	1733.85	18.3577	1733.85	18.3577	99.0451	Gehrels et al. (2011)
Tapeats 2	UA	Tapeats2-69	96.4977	0.730624	1746.75	15.3011	1734.06	29.7598	1734.06	29.7598	100.732	Gehrels et al. (2011)
Tapeats 2	UA	Tapeats2-22	98.6333	0.462956	1721.56	15.1086	1734.74	40.1983	1734.74	40.1983	99.2407	Gehrels et al. (2011)
Tapeats 2	UA	Tapeats2-104	247.089	0.33649	1705.88	14.9883	1735.87	37.6168	1735.87	37.6168	98.2721	Gehrels et al. (2011)
Tapeats 2	UA	Tapeats2-18	346.259	0.588216	1548.92	17.6242	1737.37	26.2531	1737.37	26.2531	89.1531	Gehrels et al. (2011)
Tapeats 2	UA	Tapeats2-106	248.884	0.43255	1611.44	23.8112	1737.44	24.3964	1737.44	24.3964	92.7481	Gehrels et al. (2011)
Tapeats 2	UA	Tapeats2-29	130.813	0.316397	1678.27	19.5043	1738.23	32.1506	1738.23	32.1506	96.5503	Gehrels et al. (2011)
Tapeats 2	UA	Tapeats2-41	164.808	0.306768	1732.21	21.5698	1739.85	23.8498	1739.85	23.8498	99.5611	Gehrels et al. (2011)
Tapeats 2	UA	Tapeats2-74	98.2206	0.466575	1752.3	20.867	1742.82	22.449	1742.82	22.449	100.544	Gehrels et al. (2011)
Tapeats 2	UA	Tapeats2-101	111.932	0.477466	1755.06	15.3644	1742.84	22.0386	1742.84	22.0386	100.701	Gehrels et al. (2011)
Tapeats 2	UA	Tapeats2-102	54.2587	0.566551	1737.21	19.7997	1743.84	53.4066	1743.84	53.4066	99.6202	Gehrels et al. (2011)
Tapeats 2	UA	Tapeats2-59	126.552	0.879976	1754.61	35.4841	1747.74	45.2898	1747.74	45.2898	100.393	Gehrels et al. (2011)
Tapeats 2	UA	Tapeats2-42	98.9841	0.429393	1742.41	32.2155	1747.84	27.6834	1747.84	27.6834	99.6896	Gehrels et al. (2011)
Tapeats 2	UA	Tapeats2-67	303.607	0.386351	1727.13	18.7875	1747.91	31.5028	1747.91	31.5028	98.8117	Gehrels et al. (2011)
Tapeats 2	UA	Tapeats2-51	92.8969	0.237317	1741.19	21.3621	1748.5	66.8808	1748.5	66.8808	99.5815	Gehrels et al. (2011)
Tapeats 2	UA	Tapeats2-14	80.2066	0.278509	1727.27	38.487	1750.09	57.1565	1750.09	57.1565	98.6958	Gehrels et al. (2011)
Tapeats 2	UA	Tapeats2-8	183.173	0.331055	1716.67	21.2503	1752.16	35.8784	1752.16	35.8784	97.9748	Gehrels et al. (2011)
Tapeats 2	UA	Tapeats2-33	290.783	0.260615	1736.43	44.2973	1752.35	28.3752	1752.35	28.3752	99.0915	Gehrels et al. (2011)
Tapeats 2	UA	Tapeats2-38	214.032	0.396567	1717.04	22.0079	1757.35	26.9282	1757.35	26.9282	97.7058	Gehrels et al. (2011)
Tapeats 2	UA	Tapeats2-86	82.0741	0.761104	1732.89	19.9059	1759	37.8373	1759	37.8373	98.5154	Gehrels et al. (2011)
Tapeats 2	UA	Tapeats2-94	113.604	0.282007	1775.45	15.5194	1763.43	49.0183	1763.43	49.0183	100.682	Gehrels et al. (2011)
Tapeats 2	UA	Tapeats2-17	377.221	0.477957	1730.4	23.6749	1764.34	40.3932	1764.34	40.3932	98.0762	Gehrels et al. (2011)
Tapeats 2	UA	Tapeats2-12	131.04	0.350556	1741.73	17.0942	1770.23	38.9224	1770.23	38.9224	98.3899	Gehrels et al. (2011)
Tapeats 2	UA	Tapeats2-9	239.114	0.170725	1772.19	47.1046	1770.24	40.0112	1770.24	40.0112	100.111	Gehrels et al. (2011)
Tapeats 2	UA	Tapeats2-93	202.879	0.524423	1716.55	39.0321	1777.8	29.2058	1777.8	29.2058	96.5544	Gehrels et al. (2011)
Tapeats 2	UA	Tapeats2-10	87.9549	0.598906	1771.93	17.9719	1781.09	44.104	1781.09	44.104	99.4859	Gehrels et al. (2011)
Tapeats 2	UA	Tapeats2-54	101.44	0.539998	1647.06	31.9769	1788.23	32.4091	1788.23	32.4091	92.1055	Gehrels et al. (2011)
Tapeats 2	UA	Tapeats2-19	126.005	0.424575	1773.25	40.7725	1792.99	26.4254	1792.99	26.4254	98.8989	Gehrels et al. (2011)
Tapeats 2	UA	Tapeats2-87	124.2	0.176034	1813.46	24.027	1815.79	47.5903	1815.79	47.5903	99.8721	Gehrels et al. (2011)
Tapeats 2	UA	Tapeats2-82	76.09	0.593155	1806.46	48.9968	1821.74	33.7742	1821.74	33.7742	99.1613	Gehrels et al. (2011)
Tapeats 2	UA	Tapeats2-107	83.1883	0.461524	1804.42	15.739	1824.06	31.2664	1824.06	31.2664	98.9237	Gehrels et al. (2011)
Tapeats 2	UA	Tapeats2-83	79.9487	0.493704	1802.88	36.173	1829.61	33.3848	1829.61	33.3848	98.539	Gehrels et al. (2011)
Tapeats 2	UA	Tapeats2-31	131.349	0.468764	1839.7	31.3696	1838.28	38.0768	1838.28	38.0768	100.077	Gehrels et al. (2011)
Tapeats 2	UA	Tapeats2-53	194.894	0.196434	1916.72	31.5029	1954.03	28.2368	1954.03	28.2368	98.0909	Gehrels et al. (2011)
Tapeats 2	UA	Tapeats2-13	36.5232	1.71783	2679.56	21.9245	2684.6	29.1123	2684.6	29.1123	99.8124	Gehrels et al. (2011)
Lower Bright Angel	UA	Lower Bright Angel-89	48.019	1.07636	1063.02	26.5995	1108.95	152.664	1108.95	152.664	95.8581	Gehrels et al. (2011)
Lower Bright Angel	UA	Lower Bright Angel-73	276.313	0.340278	1251.46	28.8016	1252.94	21.8437	1252.94	21.8437	99.8818	Gehrels et al. (2011)
Lower Bright Angel	UA	Lower Bright Angel-70	115.174	0.496083	1374.21	47.9261	1369.64	39.97	1369.64	39.97	100.334	Gehrels et al. (2011)
Lower Bright Angel	UA	Lower Bright Angel-56	51.5265	0.643324	1411.87	59.3358	1407.75	64.096	1407.75	64.096	100.292	Gehrels et al. (2011)
Lower Bright Angel	UA	Lower Bright Angel-24	101.915	0.330358	1315.22	52.8323	1421.85	22.5052	1421.85	22.5052	92.5007	Gehrels et al. (2011)
Lower Bright Angel	UA	Lower Bright Angel-92	108.274	0.609847	1426.72	62.7747	1425.74	24.8746	1425.74	24.8746	100.069	Gehrels et al. (2011)
Lower Bright Angel	UA	Lower Bright Angel-46	42.8023	1.41985	1439.04	30.829	1428.62	89.2624	1428.62	89.2624	100.729	Gehrels et al. (2011)
Lower Bright Angel	UA	Lower Bright Angel-77	87.2894	0.958332	1446.96	39.7851	1429.14	34.9573	1429.14	34.9573	101.247	Gehrels et al. (2011)
Lower Bright Angel	UA	Lower Bright Angel-93	104.864	0.282075	1414.19	60.1704	1436.64	29.2231	1436.64	29.2231	98.4375	Gehrels et al. (2011)
Lower Bright Angel	UA	Lower Bright Angel-15	161.007	1.28092	1481.37	59.7858	1439.56	28.3054	1439.56	28.3054	102.905	Gehrels et al. (2011)
Lower Bright Angel	UA	Lower Bright Angel-47	135.209	0.575181	1444.37	30.9856	1441.72	20.6532	1441.72	20.6532	100.184	Gehrels et al. (2011)
Lower Bright Angel	UA	Lower Bright Angel-48	121.938	0.624416	1436.27	34.3417	1442.47	22.5895	1442.47	22.5895	99.5702	Gehrels et al. (2011)
Lower Bright Angel	UA	Lower Bright Angel-40	140.028	2.00282	1442.98	44.3599	1444.74	27.3876	1444.74	27.3876	99.8776	Gehrels et al. (2011)
Lower Bright Angel	UA	Lower Bright Angel-33	227.132	0.388201	1454.24	75.5058	1447.16	21.3741	1447.16	21.3741	100.489	Gehrels et al. (2011)
Lower Bright Angel	UA	Lower Bright Angel-76	178.352	0.277433	1342.42	24.1268	1447.63	33.2094	1447.63	33.2094	92.7327	Gehrels et al. (2011)
Lower Bright Angel	UA	Lower Bright Angel-99	137.372	1.1516	1422.32	29.3425	1452.77	20.887	1452.77	20.887	97.9041	Gehrels et al. (2011)
Lower Bright Angel	UA	Lower Bright Angel-62	269.57	0.165564	1423.08	20.7248	1453.97	12.4662	1453.97	12.4662	97.8754	Gehrels et al. (2011)
Lower Bright Angel	UA	Lower Bright Angel-4	186.54	0.815202	1458.86	33.2454	1454.18	12.0389	1454.18	12.0389	100.322	Gehrels et al. (2011)
Lower Bright Angel	UA	Lower Bright Angel-59	249.748	0.446342	1399.48	39.1993	1455.99	18.5433	1455.99	18.5433	96.1184	Gehrels et al. (2011)
Lower Bright Angel	UA	Lower Bright Angel-78	113.832	0.50377	1445.82	37.8952	1456.64	26.7964	1456.64	26.7964	99.2575	Gehrels et al. (2011)
Lower Bright Angel	UA	Lower Bright Angel-65	227.239	0.339224	1382.45	101.379	1457.04	29.6199	1457.04	29.6199	94.8802	Gehrels et al. (2011)
Lower Bright Angel	UA	Lower Bright Angel-86	86.4565	0.678784	1469.58	58.8718	1458.64	37.8039	1458.64	37.8039	100.75	Gehrels et al. (2011)
Lower Bright Angel	UA	Lower Bright Angel-71	152.828	0.223662	1424.27	60.3205	1459.38	33.2344	1459.38	33.2344	97.5947	Gehrels et al. (2011)
Lower Bright Angel	UA	Lower Bright Angel-53	74.0296	0.806485	1436.96	39.2987	1470.91	41.7677	1470.91	41.7677	97.6919	Gehrels et al. (2011)
Lower Bright Angel	UA	Lower Bright Angel-21	256.412	0.323337	1333.73	31.1969	1621.13	11.1192	1621.13	11.1192	82.2713	Gehrels et al. (2011)
Lower Bright Angel	UA	Lower Bright Angel-52	38.0713	0.343696	1675.19	32.9625	1652.72	48.4601	1652.72	48.4601	101.36	Gehrels et al. (2011)
Lower Bright Angel	UA	Lower Bright Angel-97	133.304	0.619153	1604.15	127.98	1653.87	38.1025	1653.87	38.1025	96.9941	Gehrels et al. (2011)
Lower Bright Angel	UA	Lower Bright Angel-91	449.406	0.299794	1393.7	59.7192	1663.02	44.4573	1663.02	44.4573	83.8052	Gehrels et al. (2011)
Lower Bright Angel	UA	Lower Bright Angel-81	213.084	0.19263	1580.62	61.5891	1665.66	23.8476	1665.66	23.8476	94.8944	Gehrels et al. (2011)
Lower Bright Angel	UA	Lower Bright Angel-69	227.53	0.388869	1553.7	146.153	1667.57	15.8365	1667.57	15.8365	93.1715	Gehrels et al. (2011)
Lower Bright Angel	UA	Lower Bright Angel-41	120.022	0.376744	1666.88	38.8217	1672.06	14.1451	1672.06	14.1451	99.6903	Gehrels et al. (2011)
Lower Bright Angel	UA	Lower Bright Angel-49	65.491	0.562216	1676.32	57.6007	1672.23	36.6051	1672.23	36.6051	100.244	Gehrels et al. (2011)
Lower Bright Angel	UA	Lower Bright Angel-22	138.336	0.333179	1668.52	50.4786	1675.93	22.777	1675.93	22.777	99.5581	Gehrels et al. (2011)
Lower Bright Angel	UA	Lower Bright Angel-67	49.0366	0.589339	1650.06	60.245	1678.33	38.0029	1678.33	38.0029	98.3159	Gehrels et al. (2011)
Lower Bright Angel	UA	Lower Bright Angel-25	122.972	0.185407	1687.42	46.0615	1678.5	25.4944	1678.5	25.4944	100.531	Gehrels et al. (2011)
Lower Bright Angel	UA	Lower Bright Angel-31	135.805	0.268461	1590.03	24.6727	1680.52	24.2803	1680.52	24.2803	94.6151	Gehrels et al. (2011)
Lower Bright Angel	UA	Lower Bright Angel-66	60.1717	0.559797	1669.74	42.4683	1686.17	39.5923	1686.17	39.5923	99.0258	Gehrels et al. (2011)
Lower Bright Angel	UA	Lower Bright Angel-83	229.193	0.202935	1689.83	53.7405	1690.57	13.8608	1690.57	13.8608	99.956	Gehrels et al. (2011)
Lower Bright Angel	UA	Lower Bright Angel-87	202.571	0.284768	1694.41	31.6556	1691.37	17.9233	1691.37	17.9233	100.18	Gehrels et al. (2011)
Lower Bright Angel	UA	Lower Bright Angel-9	90.0814	0.924836	1501.73	82.8289	1699.38	24.3069	1699.38	24.3069	88.3693	Gehrels et al. (2011)
Lower Bright Angel	UA	Lower Bright Angel-27	93.9307	0.395288	1644.52	58.3731	1699.68	40.0692	1699.68	40.0692	96.7545	Gehrels et al. (2011)
Lower Bright Angel	UA	Lower Bright Angel-84	188.154	0.17822	1597.98	64.7017	1699.82	22.6015	1699.82	22.6015	94.0089	Gehrels et al. (2011)
Lower Bright Angel	UA	Lower Bright Angel-74	218.371	0.11281	1710.36	53.2394	1701.01	8.90723	1701.01	8.90723	100.55	Gehrels et al. (2011)
Lower Bright Angel	UA	Lower Bright Angel-13	78.5119	0.859081	1697.98	40.7256	1702.98	25.3982	1702.98	25.3982	99.7066	Gehrels et al. (2011)
Lower Bright Angel	UA	Lower Bright Angel-12	133.889	0.461908	1694.96	50.7023	1704.66	23.701	1704.66	23.701	99.4307	Gehrels et al. (2011)
Lower Bright Angel	UA	Lower Bright Angel-1	295.481	0.606606	1686.34	44.2177	1704.76	10.0811	1704.76	10.0811	98.9194	Gehrels et al. (2011)
Lower Bright Angel	UA	Lower Bright Angel-80	136.008	0.400345	1703.59	38.1945	1706.26	19.2125	1706.26	19.2125	99.8434	Gehrels et al. (2011)
Lower Bright Angel	UA	Lower Bright Angel-34	97.2943	0.225987	1702.92	29.728	1708.96	30.3163	1708.96	30.3163	99.6467	Gehrels et al. (2011)
Lower Bright Angel	UA	Lower Bright Angel-26	128.433	0.745603	1697.02	85.2495	1709.76	22.1767	1709.76	22.1767	99.255	Gehrels et al. (2011)
Lower Bright Angel	UA	Lower Bright Angel-64	180.746	0.16314	1687.15	39.5505	1710.29	9.83512	1710.29	9.83512	98.6466	Gehrels et al. (2011)
Lower Bright Angel	UA	Lower Bright Angel-32	150.245	0.259396	1718.02	33.7979	1710.92	17.8288	1710.92	17.8288	100.415	Gehrels et al. (2011)
Lower Bright Angel	UA	Lower Bright Angel-20	137.295	0.773294	1733.46	70.7814	1713.25	22.9485	1713.25	22.9485	101.179	Gehrels et al. (2011)
Lower Bright Angel	UA	Lower Bright Angel-44	88.2538	0.263155	1692.43	32.0755	1713.27	28.9351	1713.27	28.9351	98.7837	Gehrels et al. (2011)
Lower Bright Angel	UA	Lower Bright Angel-3	86.2008	1.01906	1718.29	102.611	1714.87	37.4208	1714.87	37.4208	100.199	Gehrels et al. (2011)
Lower Bright Angel	UA	Lower Bright Angel-57	126.403	0.512583	1691.91	17.5668	1715.87	69.9337	1715.87	69.9337	98.6037	Gehrels et al. (2011)
Lower Bright Angel	UA	Lower Bright Angel-63	222.984	0.16739	1723.2	33.5009	1727.42	15.9243	1727.42	15.9243	99.7557	Gehrels et al. (2011)
Lower Bright Angel	UA	Lower Bright Angel-60	135.921	0.595512	1709.74	45.2792	1732.84	12.3378	1732.84	12.3378	98.667	Gehrels et al. (2011)
Lower Bright Angel	UA	Lower Bright Angel-42	98.6443	0.35693	1640.3	29.0229	1733.23	34.4666	1733.23	34.4666	94.6385	Gehrels et al. (2011)
Lower Bright Angel	UA	Lower Bright Angel-54	119.998	0.294082	1759.38	50.5897	1738.31	26.3337	1738.31	26.3337	101.212	Gehrels et al. (2011)
Lower Bright Angel	UA	Lower Bright Angel-23	77.7657	0.514386	1758.73	37.7116	1741.33	37.2808	1741.33	37.2808	101	Gehrels et al. (2011)
Lower Bright Angel	UA	Lower Bright Angel-8	118.778	0.27126	1678.97	69.0252	1741.64	11.6051	1741.64	11.6051	96.4016	Gehrels et al. (2011)
Lower Bright Angel	UA	Lower Bright Angel-36	102.965	0.342639	1712.38	80.3914	1744.63	14.6684	1744.63	14.6684	98.1514	Gehrels et al. (2011)
Lower Bright Angel	UA	Lower Bright Angel-68	148.003	0.315347	1754.9	69.2184	1745.38	19.4416	1745.38	19.4416	100.545	Gehrels et al. (2011)
Lower Bright Angel	UA	Lower Bright Angel-28	105.989	0.312854	1738.85	50.6742	1746.87	16.8206	1746.87	16.8206	99.5413	Gehrels et al. (2011)
Lower Bright Angel	UA	Lower Bright Angel-50	99.7042	0.621146	1735.37	72.2931	1747.12	21.7853	1747.12	21.7853	99.3271	Gehrels et al. (2011)
Lower Bright Angel	UA	Lower Bright Angel-82	81.1145	0.206033	1730.5	51.3496	1749.24	40.3314	1749.24	40.3314	98.9287	Gehrels et al. (2011)
Lower Bright Angel	UA	Lower Bright Angel-17	176.649	1.15384	1716.56	40.3105	1750.01	16.5948	1750.01	16.5948	98.0883	Gehrels et al. (2011)
Lower Bright Angel	UA	Lower Bright Angel-30	121.498	0.583124	1755.86	74.1837	1750.1	16.4075	1750.1	16.4075	100.329	Gehrels et al. (2011)
Lower Bright Angel	UA	Lower Bright Angel-35	49.7413	0.77049	1742.75	121.731	1751.18	26.3738	1751.18	26.3738	99.5189	Gehrels et al. (2011)
Lower Bright Angel	UA	Lower Bright Angel-74	85.7638	0.208245	1758.65	44.1524	1751.78	22.4217	1751.78	22.4217	100.392	Gehrels et al. (2011)
Lower Bright Angel	UA	Lower Bright Angel-98	132.994	0.433781	1765.41	55.7174	1753.66	17.2058	1753.66	17.2058	100.67	Gehrels et al. (2011)
Lower Bright Angel	UA	Lower Bright Angel-2	94.1002	1.04797	1750.39	44.0449	1754.78	23.8771	1754.78	23.8771	99.7499	Gehrels et al. (2011)
Lower Bright Angel	UA	Lower Bright Angel-85	141.025	0.328622	1750.99	53.1113	1760.45	29.1281	1760.45	29.1281	99.4624	Gehrels et al. (2011)
Lower Bright Angel	UA	Lower Bright Angel-6	156.702	0.502432	1760.61	55.8241	1762.32	12.8853	1762.32	12.8853	99.9029	Gehrels et al. (2011)
Lower Bright Angel	UA	Lower Bright Angel-95	153.082	0.195035	1769.93	48.5538	1765.69	16.2554	1765.69	16.2554	100.24	Gehrels et al. (2011)
Lower Bright Angel	UA	Lower Bright Angel-7	106.183	1.0513	1721.62	38.6097	1766.16	24.0167	1766.16	24.0167	97.4782	Gehrels et al. (2011)
Lower Bright Angel	UA	Lower Bright Angel-29	169.398	0.516554	1575.61	33.7027	1770.37	30.1136	1770.37	30.1136	88.9991	Gehrels et al. (2011)
Lower Bright Angel	UA	Lower Bright Angel-19	79.4299	0.649384	1746.26	70.3747	1771.53	26.3039	1771.53	26.3039	98.5735	Gehrels et al. (2011)
Lower Bright Angel	UA	Lower Bright Angel-14	119.415	0.567196	1778.26	80.1428	1774.52	22.6951	1774.52	22.6951	100.211	Gehrels et al. (2011)
Lower Bright Angel	UA	Lower Bright Angel-94	88.1788	0.314898	1770.39	77.0095	1777.58	39.4607	1777.58	39.4607	99.596	Gehrels et al. (2011)
Lower Bright Angel	UA	Lower Bright Angel-58	129.854	0.257137	1789.35	41.3517	1781.19	18.1202	1781.19	18.1202	100.458	Gehrels et al. (2011)
Lower Bright Angel	UA	Lower Bright Angel-51	103.07	0.338473	1765.37	23.0921	1783.24	23.6443	1783.24	23.6443	98.9978	Gehrels et al. (2011)
Lower Bright Angel	UA	Lower Bright Angel-16	172.903	0.663735	1795.99	43.9234	1785.54	8.95345	1785.54	8.95345	100.586	Gehrels et al. (2011)
Lower Bright Angel	UA	Lower Bright Angel-38	125.626	0.803009	1790.83	60.4375	1787.18	18.2523	1787.18	18.2523	100.204	Gehrels et al. (2011)
Lower Bright Angel	UA	Lower Bright Angel-79	186.673	0.392177	1785	44.6093	1798.15	7.72839	1798.15	7.72839	99.2689	Gehrels et al. (2011)
Lower Bright Angel	UA	Lower Bright Angel-100	231.174	0.298567	1929.03	47.5446	1929.56	10.6524	1929.56	10.6524	99.9727	Gehrels et al. (2011)
Lower Bright Angel	UA	Lower Bright Angel-18	121.333	0.84368	1934.32	65.3504	1929.9	17.6446	1929.9	17.6446	100.229	Gehrels et al. (2011)
Lower Bright Angel	UA	Lower Bright Angel-96	60.7552	0.035982	1954.77	109.467	1944.94	43.3752	1944.94	43.3752	100.506	Gehrels et al. (2011)
Lower Bright Angel	UA	Lower Bright Angel-37	151.719	0.737786	1973.4	50.3217	1981.8	8.03048	1981.8	8.03048	99.576	Gehrels et al. (2011)
Lower Bright Angel	UA	Lower Bright Angel-61	393.255	0.127054	2023.73	38.5592	2525.27	7.56451	2525.27	7.56451	80.1389	Gehrels et al. (2011)
Lower Bright Angel	UA	Lower Bright Angel-43	87.9211	1.02457	2490.27	50.3613	2658.47	16.162	2658.47	16.162	93.6731	Gehrels et al. (2011)
Bright Angel	UA	BrightAngel-60	674.962	0.444146	926.576	7.19171	1017.14	18.0375	1017.14	18.0375	91.0964	Gehrels et al. (2011)
Bright Angel	UA	BrightAngel-34	361.469	0.438114	1036.93	10.5651	1024.42	14.2676	1024.42	14.2676	101.221	Gehrels et al. (2011)
Bright Angel	UA	BrightAngel-66	346.756	0.193718	1038.35	10.5204	1036.62	20.823	1036.62	20.823	100.166	Gehrels et al. (2011)
Bright Angel	UA	BrightAngel-54	352.063	0.503891	1037.95	10.6123	1058.86	23.237	1058.86	23.237	98.0255	Gehrels et al. (2011)
Bright Angel	UA	BrightAngel-11	131.101	0.472823	1022.44	19.0144	1068.86	45.4663	1068.86	45.4663	95.6579	Gehrels et al. (2011)
Bright Angel	UA	BrightAngel-94	201.216	0.182987	1003.97	14.1031	1088.39	27.4493	1088.39	27.4493	92.2436	Gehrels et al. (2011)
Bright Angel	UA	BrightAngel-13	88.4583	0.499633	1444.3	31.4338	1421.41	84.8952	1421.41	84.8952	101.61	Gehrels et al. (2011)
Bright Angel	UA	BrightAngel-93	197.905	0.612187	1283.83	16.2834	1423.71	22.1932	1423.71	22.1932	90.1748	Gehrels et al. (2011)
Bright Angel	UA	BrightAngel-55	213.668	0.673963	1403.55	15.731	1423.82	21.4496	1423.82	21.4496	98.5759	Gehrels et al. (2011)
Bright Angel	UA	BrightAngel-6	173.71	0.630839	1441.18	17.1866	1431.72	21.4444	1431.72	21.4444	100.661	Gehrels et al. (2011)
Bright Angel	UA	BrightAngel-70	220.333	0.536277	1425.95	16.0341	1435.89	21.8257	1435.89	21.8257	99.3076	Gehrels et al. (2011)
Bright Angel	UA	BrightAngel-9	165.44	0.888587	1419.67	19.1551	1436.09	20.1066	1436.09	20.1066	98.8567	Gehrels et al. (2011)
Bright Angel	UA	BrightAngel-91	269.276	0.17679	1324.36	13.5419	1440.75	14.6467	1440.75	14.6467	91.9218	Gehrels et al. (2011)
Bright Angel	UA	BrightAngel-22	87.1807	0.640655	1463.05	26.7633	1444.82	28.8314	1444.82	28.8314	101.261	Gehrels et al. (2011)
Bright Angel	UA	BrightAngel-99	118.675	0.584689	1453.58	22.7258	1447.93	24.3478	1447.93	24.3478	100.39	Gehrels et al. (2011)
Bright Angel	UA	BrightAngel-89	97.134	0.75723	1416.65	49.488	1449.88	54.6711	1449.88	54.6711	97.7086	Gehrels et al. (2011)
Bright Angel	UA	BrightAngel-86	187.263	0.538046	1428.78	17.3086	1450.77	17.6834	1450.77	17.6834	98.4846	Gehrels et al. (2011)
Bright Angel	UA	BrightAngel-57	208.169	0.474079	1432.29	16.444	1451.46	21.4695	1451.46	21.4695	98.6788	Gehrels et al. (2011)
Bright Angel	UA	BrightAngel-41	285.315	0.394468	1400.74	23.7241	1452.65	71.7574	1452.65	71.7574	96.4263	Gehrels et al. (2011)
Bright Angel	UA	BrightAngel-85	246.177	0.383655	1170.29	13.7931	1454.18	18.4493	1454.18	18.4493	80.4776	Gehrels et al. (2011)
Bright Angel	UA	BrightAngel-92	135.051	0.561554	1415.69	20.6921	1455.53	22.699	1455.53	22.699	97.2627	Gehrels et al. (2011)
Bright Angel	UA	BrightAngel-62	141.832	1.15583	1458.25	20.6236	1455.9	29.6328	1455.9	29.6328	100.161	Gehrels et al. (2011)
Bright Angel	UA	BrightAngel-27	121.719	0.647445	1454.89	23.9815	1458.8	29.0578	1458.8	29.0578	99.7319	Gehrels et al. (2011)
Bright Angel	UA	BrightAngel-5	148.43	0.790308	1425.84	20.4563	1459.91	21.0886	1459.91	21.0886	97.6663	Gehrels et al. (2011)
Bright Angel	UA	BrightAngel-65	457.716	0.605689	1388.95	11.1135	1460.48	10.1023	1460.48	10.1023	95.1024	Gehrels et al. (2011)
Bright Angel	UA	BrightAngel-40	150.895	0.782892	1396.24	24.3999	1460.57	45.9865	1460.57	45.9865	95.5954	Gehrels et al. (2011)
Bright Angel	UA	BrightAngel-104	261.789	0.439837	1427.79	14.6641	1461.73	13.3381	1461.73	13.3381	97.6779	Gehrels et al. (2011)
Bright Angel	UA	BrightAngel-30	63.0974	0.499062	1448.87	32.0428	1462.12	37.5273	1462.12	37.5273	99.0938	Gehrels et al. (2011)
Bright Angel	UA	BrightAngel-47	165.898	0.570593	1418.42	17.2693	1462.48	20.75	1462.48	20.75	96.9871	Gehrels et al. (2011)
Bright Angel	UA	BrightAngel-52	257.662	0.478467	1397.47	14.2888	1462.81	14.6642	1462.81	14.6642	95.5335	Gehrels et al. (2011)
Bright Angel	UA	BrightAngel-45	271.543	0.427713	1337.33	13.6584	1463.51	16.3891	1463.51	16.3891	91.3782	Gehrels et al. (2011)
Bright Angel	UA	BrightAngel-28	114.514	0.496635	1449	23.3735	1463.74	28.3574	1463.74	28.3574	98.9926	Gehrels et al. (2011)
Bright Angel	UA	BrightAngel-46	92.715	0.589225	1439.51	24.2093	1464.08	31.9085	1464.08	31.9085	98.3218	Gehrels et al. (2011)
Bright Angel	UA	BrightAngel-67	325.832	0.422286	1381.01	12.2444	1466.95	14.4043	1466.95	14.4043	94.1412	Gehrels et al. (2011)
Bright Angel	UA	BrightAngel-83	246.062	0.416374	1457.15	15.4187	1469.23	16.1251	1469.23	16.1251	99.1773	Gehrels et al. (2011)
Bright Angel	UA	BrightAngel-101	318.204	0.34424	1450.06	12.6142	1470.77	12.9897	1470.77	12.9897	98.5919	Gehrels et al. (2011)
Bright Angel	UA	BrightAngel-31	275.601	0.63108	1363.69	13.5402	1476.84	14.4505	1476.84	14.4505	92.3384	Gehrels et al. (2011)
Bright Angel	UA	BrightAngel-37	305.124	1.13722	1452.2	13.7162	1482.5	16.4997	1482.5	16.4997	97.9562	Gehrels et al. (2011)
Bright Angel	UA	BrightAngel-90	301.777	0.55918	1447.97	13.286	1486.06	13.1862	1486.06	13.1862	97.4374	Gehrels et al. (2011)
Bright Angel	UA	BrightAngel-44	256.894	0.810777	1624.38	19.6171	1623.18	36.3616	1623.18	36.3616	100.074	Gehrels et al. (2011)
Bright Angel	UA	BrightAngel-74	147.02	0.568439	1635.7	21.8544	1638.61	23.3996	1638.61	23.3996	99.8223	Gehrels et al. (2011)
Bright Angel	UA	BrightAngel-16	196.443	0.896789	1557.67	17.5738	1644.16	13.968	1644.16	13.968	94.7394	Gehrels et al. (2011)
Bright Angel	UA	BrightAngel-18	116.2	0.850758	1654.26	23.4503	1649.88	26.2289	1649.88	26.2289	100.265	Gehrels et al. (2011)
Bright Angel	UA	BrightAngel-71	294.782	0.423167	1624.44	14.1821	1653.01	11.9536	1653.01	11.9536	98.2715	Gehrels et al. (2011)
Bright Angel	UA	BrightAngel-7	196.994	0.952949	1618.78	17.3472	1653.43	15.2937	1653.43	15.2937	97.9045	Gehrels et al. (2011)
Bright Angel	UA	BrightAngel-1	165.424	1.4041	1665.81	19.3733	1662.54	16.104	1662.54	16.104	100.197	Gehrels et al. (2011)
Bright Angel	UA	BrightAngel-4	250.302	0.948483	1588.08	15.6567	1664.25	11.9878	1664.25	11.9878	95.4232	Gehrels et al. (2011)
Bright Angel	UA	BrightAngel-88	126.096	0.542893	1632.51	25.5733	1665.64	19.9467	1665.64	19.9467	98.0113	Gehrels et al. (2011)
Bright Angel	UA	BrightAngel-103	182.619	0.510835	1663.8	18.5286	1669.94	16.4775	1669.94	16.4775	99.6325	Gehrels et al. (2011)
Bright Angel	UA	BrightAngel-81	157.384	0.524712	1651.44	19.6984	1672.23	17.8506	1672.23	17.8506	98.7566	Gehrels et al. (2011)
Bright Angel	UA	BrightAngel-73	95.9808	0.449747	1646.15	29.2489	1672.48	28.9484	1672.48	28.9484	98.4257	Gehrels et al. (2011)
Bright Angel	UA	BrightAngel-58	107.653	0.501703	1669.78	25.8394	1673.83	24.0388	1673.83	24.0388	99.758	Gehrels et al. (2011)
Bright Angel	UA	BrightAngel-49	183.785	0.462941	1657.2	18.3755	1674.28	16.8329	1674.28	16.8329	98.9798	Gehrels et al. (2011)
Bright Angel	UA	BrightAngel-50	277.441	0.755921	1552.8	14.8982	1675.92	13.5704	1675.92	13.5704	92.6531	Gehrels et al. (2011)
Bright Angel	UA	BrightAngel-64	181.473	0.269312	1672.24	18.1031	1676.87	17.6337	1676.87	17.6337	99.7238	Gehrels et al. (2011)
Bright Angel	UA	BrightAngel-8	70.368	0.634704	1676.22	31.6403	1679.68	31.9132	1679.68	31.9132	99.7938	Gehrels et al. (2011)
Bright Angel	UA	BrightAngel-68	52.369	0.330644	1635.74	41.6469	1684.71	39.6371	1684.71	39.6371	97.093	Gehrels et al. (2011)
Bright Angel	UA	BrightAngel-76	118.896	0.526617	1691.66	23.1916	1690.46	20.8798	1690.46	20.8798	100.071	Gehrels et al. (2011)
Bright Angel	UA	BrightAngel-82	142.43	0.385703	1682.36	30.2213	1703.24	51.8204	1703.24	51.8204	98.7741	Gehrels et al. (2011)
Bright Angel	UA	BrightAngel-23	110.413	0.773402	1682	28.4509	1704.75	19.7289	1704.75	19.7289	98.6656	Gehrels et al. (2011)
Bright Angel	UA	BrightAngel-51	131.335	0.327306	1610.57	22.2747	1706.21	21.5363	1706.21	21.5363	94.395	Gehrels et al. (2011)
Bright Angel	UA	BrightAngel-3	123.626	0.492093	1714.63	24.0997	1712.12	18.9746	1712.12	18.9746	100.147	Gehrels et al. (2011)
Bright Angel	UA	BrightAngel-102	164.401	0.195724	1628.67	20.109	1715.32	16.3188	1715.32	16.3188	94.9487	Gehrels et al. (2011)
Bright Angel	UA	BrightAngel-61	176.578	0.333154	1712.94	21.7927	1715.66	16.7196	1715.66	16.7196	99.8415	Gehrels et al. (2011)
Bright Angel	UA	BrightAngel-75	453.436	0.720331	1683.96	11.9442	1716.82	10.665	1716.82	10.665	98.0858	Gehrels et al. (2011)
Bright Angel	UA	BrightAngel-72	199.909	0.490485	1698.23	17.4773	1720.66	15.9715	1720.66	15.9715	98.6964	Gehrels et al. (2011)
Bright Angel	UA	BrightAngel-69	239.748	0.45015	1712.97	15.678	1721.31	15.1378	1721.31	15.1378	99.5156	Gehrels et al. (2011)
Bright Angel	UA	BrightAngel-63	351.722	0.287767	1691.61	13.2874	1723.13	11.2691	1723.13	11.2691	98.1704	Gehrels et al. (2011)
Bright Angel	UA	BrightAngel-20	356.682	0.257563	1723.26	13.229	1723.91	12.4489	1723.91	12.4489	99.9627	Gehrels et al. (2011)
Bright Angel	UA	BrightAngel-105	306.762	0.345821	1713.6	14.4173	1724.4	10.0898	1724.4	10.0898	99.3739	Gehrels et al. (2011)
Bright Angel	UA	BrightAngel-48	168.904	0.476883	1718.6	18.9541	1728.6	14.8131	1728.6	14.8131	99.4218	Gehrels et al. (2011)
Bright Angel	UA	BrightAngel-95	130.009	0.445095	1736.96	22.2068	1728.79	17.998	1728.79	17.998	100.472	Gehrels et al. (2011)
Bright Angel	UA	BrightAngel-14	300.968	0.720066	1709.42	14.3598	1729.47	14.8904	1729.47	14.8904	98.8408	Gehrels et al. (2011)
Bright Angel	UA	BrightAngel-87	163.644	0.497688	1690.86	20.2458	1730.64	14.9065	1730.64	14.9065	97.7017	Gehrels et al. (2011)
Bright Angel	UA	BrightAngel-53	226.245	0.637331	1725.88	16.8333	1735.04	13.5611	1735.04	13.5611	99.4721	Gehrels et al. (2011)
Bright Angel	UA	BrightAngel-12	198.098	0.748577	1738.64	17.4818	1737.24	16.4005	1737.24	16.4005	100.081	Gehrels et al. (2011)
Bright Angel	UA	BrightAngel-15	161.903	0.390179	1738.42	21.0445	1738.73	21.622	1738.73	21.622	99.9824	Gehrels et al. (2011)
Bright Angel	UA	BrightAngel-17	107.113	0.457479	1755.19	25.9237	1739.41	29.4541	1739.41	29.4541	100.907	Gehrels et al. (2011)
Bright Angel	UA	BrightAngel-19	150.205	0.374304	1734.28	21.2143	1739.52	26.1537	1739.52	26.1537	99.6989	Gehrels et al. (2011)
Bright Angel	UA	BrightAngel-96	170.947	0.555115	1720.25	20.7648	1739.76	15.1892	1739.76	15.1892	98.8787	Gehrels et al. (2011)
Bright Angel	UA	BrightAngel-10	260.353	0.40614	1733.48	15.8885	1740.67	11.2514	1740.67	11.2514	99.5868	Gehrels et al. (2011)
Bright Angel	UA	BrightAngel-97	399.691	0.571097	1551.95	11.8	1749.36	9.08807	1749.36	9.08807	88.715	Gehrels et al. (2011)
Bright Angel	UA	BrightAngel-78	191.161	0.659093	1698.42	18.2184	1749.54	15.4781	1749.54	15.4781	97.0784	Gehrels et al. (2011)
Bright Angel	UA	BrightAngel-84	357.908	0.236979	1703.37	12.8173	1752.25	9.93326	1752.25	9.93326	97.2107	Gehrels et al. (2011)
Bright Angel	UA	BrightAngel-100	313.348	0.415461	1700.58	13.6416	1752.61	9.86335	1752.61	9.86335	97.0314	Gehrels et al. (2011)
Bright Angel	UA	BrightAngel-36	199.689	0.369122	1768.94	20.9454	1752.69	25.8835	1752.69	25.8835	100.927	Gehrels et al. (2011)
Bright Angel	UA	BrightAngel-33	218.602	0.322608	1702.35	17.078	1752.81	13.161	1752.81	13.161	97.1213	Gehrels et al. (2011)
Bright Angel	UA	BrightAngel-21	107.568	0.511495	1734.59	25.4073	1754.53	28.1226	1754.53	28.1226	98.8634	Gehrels et al. (2011)
Bright Angel	UA	BrightAngel-42	106.46	0.35103	1744.31	46.9816	1755.48	77.2951	1755.48	77.2951	99.3641	Gehrels et al. (2011)
Bright Angel	UA	BrightAngel-39	35.9339	0.170692	1647.81	18.6234	1755.6	48.949	1755.6	48.949	93.8604	Gehrels et al. (2011)
Bright Angel	UA	BrightAngel-56	251.621	0.637221	1482.56	15.07	1755.88	15.6236	1755.88	15.6236	84.434	Gehrels et al. (2011)
Bright Angel	UA	BrightAngel-25	163.636	0.391365	1721.5	21.6441	1757.2	15.4307	1757.2	15.4307	97.9685	Gehrels et al. (2011)
Bright Angel	UA	BrightAngel-24	95.5771	0.449018	1710.46	26.784	1757.71	21.3268	1757.71	21.3268	97.312	Gehrels et al. (2011)
Bright Angel	UA	BrightAngel-35	130.611	0.393062	1753.43	22.1203	1757.81	17.2663	1757.81	17.2663	99.7511	Gehrels et al. (2011)
Bright Angel	UA	BrightAngel-80	404.671	0.219453	1694.74	11.9991	1773.74	8.50239	1773.74	8.50239	95.546	Gehrels et al. (2011)
Bright Angel	UA	BrightAngel-32	239.789	0.409775	1740.51	15.9744	1778.13	12.979	1778.13	12.979	97.8842	Gehrels et al. (2011)
Bright Angel	UA	BrightAngel-2	174.269	0.335011	1777.59	20.3552	1779.71	13.709	1779.71	13.709	99.8809	Gehrels et al. (2011)
Bright Angel	UA	BrightAngel-43	232.152	0.302559	1729.04	19.8218	1782.92	26.6447	1782.92	26.6447	96.9782	Gehrels et al. (2011)
Bright Angel	UA	BrightAngel-98	252.629	0.320862	1740.45	15.7926	1783.95	11.8557	1783.95	11.8557	97.562	Gehrels et al. (2011)
Bright Angel	UA	BrightAngel-26	265.528	0.223638	1760.11	15.3221	1784.4	13.2482	1784.4	13.2482	98.6387	Gehrels et al. (2011)
Bright Angel	UA	BrightAngel-29	204.04	0.314586	1721.59	18.4125	1785.99	12.6718	1785.99	12.6718	96.3943	Gehrels et al. (2011)
Bright Angel	UA	BrightAngel-79	557.424	0.270001	1748.03	10.1387	1808.27	7.30606	1808.27	7.30606	96.6686	Gehrels et al. (2011)
Bright Angel	UA	BrightAngel-38	105.945	0.354837	1814.35	25.4393	1821.4	24.41	1821.4	24.41	99.6131	Gehrels et al. (2011)
Bright Angel	UA	BrightAngel-59	313.848	0.197957	2207.14	15.8765	2211.11	7.20779	2211.11	7.20779	99.8201	Gehrels et al. (2011)
Bright Angel	UA	BrightAngel-77	339.133	0.368614	2493.65	15.9384	2551.06	5.54311	2551.06	5.54311	97.7492	Gehrels et al. (2011)
Upper Bright Angel	UA	Upper Bright Angel-68	215.251	0.478887	757.013	16.51	760.32	71.9045	757.013	16.51	99.5651	Gehrels et al. (2011)
Upper Bright Angel	UA	Upper Bright Angel-1	208.314	0.352672	847.829	32.5503	909.462	39.5985	847.829	32.5503	93.2231	Gehrels et al. (2011)
Upper Bright Angel	UA	Upper Bright Angel-56	103.58	0.647531	996.457	25.7485	1001.8	71.2192	1001.8	71.2192	99.4667	Gehrels et al. (2011)
Upper Bright Angel	UA	Upper Bright Angel-5	147.122	0.184747	1012.6	40.1384	1021.33	43.7451	1021.33	43.7451	99.1449	Gehrels et al. (2011)
Upper Bright Angel	UA	Upper Bright Angel-16	31.9583	0.736246	1041.4	34.1621	1037.28	24.9378	1037.28	24.9378	100.397	Gehrels et al. (2011)
Upper Bright Angel	UA	Upper Bright Angel-39	97.1363	0.365908	1022.93	20.7353	1046.5	53.4381	1046.5	53.4381	97.7473	Gehrels et al. (2011)
Upper Bright Angel	UA	Upper Bright Angel-74	47.0588	0.768588	1079.07	62.7412	1050.65	47.7496	1050.65	47.7496	102.705	Gehrels et al. (2011)
Upper Bright Angel	UA	Upper Bright Angel-91	589.952	0.740223	804.412	100.49	1060.51	84.9717	1060.51	84.9717	75.8512	Gehrels et al. (2011)
Upper Bright Angel	UA	Upper Bright Angel-85	56.8451	0.903862	985.686	32.0353	1159.71	48.6074	1159.71	48.6074	84.9939	Gehrels et al. (2011)
Upper Bright Angel	UA	Upper Bright Angel-62	280.307	0.303121	1155.17	40.8511	1194.74	23.2091	1194.74	23.2091	96.6881	Gehrels et al. (2011)
Upper Bright Angel	UA	Upper Bright Angel-61	84.3704	0.668698	1204.16	56.424	1220.23	54.2978	1220.23	54.2978	98.6832	Gehrels et al. (2011)
Upper Bright Angel	UA	Upper Bright Angel-47	246.098	0.474127	1323.87	42.5703	1336.94	16.9843	1336.94	16.9843	99.0224	Gehrels et al. (2011)
Upper Bright Angel	UA	Upper Bright Angel-29	164.565	0.68526	1371.25	75.363	1388.7	16.3081	1388.7	16.3081	98.7435	Gehrels et al. (2011)
Upper Bright Angel	UA	Upper Bright Angel-35	83.2572	0.836571	1399.63	75.7893	1422.17	56.1677	1422.17	56.1677	98.4147	Gehrels et al. (2011)
Upper Bright Angel	UA	Upper Bright Angel-89	179.736	0.707911	1447.71	103.244	1427.28	30.4583	1427.28	30.4583	101.432	Gehrels et al. (2011)
Upper Bright Angel	UA	Upper Bright Angel-19	203.841	0.655447	1224.41	64.3522	1431.43	30.752	1431.43	30.752	85.5379	Gehrels et al. (2011)
Upper Bright Angel	UA	Upper Bright Angel-66	79.8468	0.61894	1423.66	51.3113	1447.41	69.2411	1447.41	69.2411	98.3591	Gehrels et al. (2011)
Upper Bright Angel	UA	Upper Bright Angel-69	215.925	0.445707	1445.4	26.1973	1450.48	16.6263	1450.48	16.6263	99.6497	Gehrels et al. (2011)
Upper Bright Angel	UA	Upper Bright Angel-3	159.586	0.618346	1407.99	43.2722	1459.74	27.118	1459.74	27.118	96.4553	Gehrels et al. (2011)
Upper Bright Angel	UA	Upper Bright Angel-59	191.116	1.03556	1196.58	41.158	1461.31	29.5333	1461.31	29.5333	81.8844	Gehrels et al. (2011)
Upper Bright Angel	UA	Upper Bright Angel-48	130.758	0.853543	1366.85	28.95	1463.48	19.1989	1463.48	19.1989	93.3971	Gehrels et al. (2011)
Upper Bright Angel	UA	Upper Bright Angel-88	78.5177	0.94825	1428.89	31.7875	1473.56	71.2654	1473.56	71.2654	96.9686	Gehrels et al. (2011)
Upper Bright Angel	UA	Upper Bright Angel-52	115.522	0.755742	1479.62	30.0243	1502.09	45.4747	1502.09	45.4747	98.5039	Gehrels et al. (2011)
Upper Bright Angel	UA	Upper Bright Angel-11	49.4641	0.792305	1642.92	41.5133	1623.17	68.2817	1623.17	68.2817	101.217	Gehrels et al. (2011)
Upper Bright Angel	UA	Upper Bright Angel-58	131.429	0.800098	1630.29	69.9667	1633	30.0271	1633	30.0271	99.834	Gehrels et al. (2011)
Upper Bright Angel	UA	Upper Bright Angel-83	49.07	0.833733	1609.77	57.6596	1637.39	41.9452	1637.39	41.9452	98.3132	Gehrels et al. (2011)
Upper Bright Angel	UA	Upper Bright Angel-17	255.295	0.200612	1664.17	30.1685	1640.52	12.9535	1640.52	12.9535	101.442	Gehrels et al. (2011)
Upper Bright Angel	UA	Upper Bright Angel-95	93.4133	0.721092	1558.91	116.995	1641.99	25.9168	1641.99	25.9168	94.9402	Gehrels et al. (2011)
Upper Bright Angel	UA	Upper Bright Angel-54	110.791	1.10645	1639.08	262.157	1643.78	67.2828	1643.78	67.2828	99.714	Gehrels et al. (2011)
Upper Bright Angel	UA	Upper Bright Angel-26	151.42	0.371306	1611.17	50.7511	1650.65	22.3591	1650.65	22.3591	97.6084	Gehrels et al. (2011)
Upper Bright Angel	UA	Upper Bright Angel-9	201.263	0.66601	1623.27	35.068	1656.36	17.5202	1656.36	17.5202	98.0022	Gehrels et al. (2011)
Upper Bright Angel	UA	Upper Bright Angel-37	152.485	0.513987	1452.47	91.437	1660.63	22.149	1660.63	22.149	87.4646	Gehrels et al. (2011)
Upper Bright Angel	UA	Upper Bright Angel-80	157.421	0.919478	1608.78	62.8737	1661.52	16.6042	1661.52	16.6042	96.826	Gehrels et al. (2011)
Upper Bright Angel	UA	Upper Bright Angel-64	92.0725	0.923973	1664.63	39.3774	1663.29	23.8297	1663.29	23.8297	100.081	Gehrels et al. (2011)
Upper Bright Angel	UA	Upper Bright Angel-71	257.776	0.84446	1414.34	61.3628	1663.79	16.3315	1663.79	16.3315	85.0072	Gehrels et al. (2011)
Upper Bright Angel	UA	Upper Bright Angel-67	202.91	0.525109	1384.99	51.5709	1665.74	16.9525	1665.74	16.9525	83.1452	Gehrels et al. (2011)
Upper Bright Angel	UA	Upper Bright Angel-40	102.151	0.80095	1615.31	41.5924	1668.39	31.2966	1668.39	31.2966	96.8183	Gehrels et al. (2011)
Upper Bright Angel	UA	Upper Bright Angel-53	212.011	0.660438	1461.45	45.7933	1668.8	12.1271	1668.8	12.1271	87.5747	Gehrels et al. (2011)
Upper Bright Angel	UA	Upper Bright Angel-50	157.645	0.474765	1570.71	45.2011	1675.27	19.1449	1675.27	19.1449	93.7584	Gehrels et al. (2011)
Upper Bright Angel	UA	Upper Bright Angel-22	118.872	0.427422	1459.85	22.9485	1680	23.5426	1680	23.5426	86.8961	Gehrels et al. (2011)
Upper Bright Angel	UA	Upper Bright Angel-18	101.152	0.487779	1694.74	28.5397	1681.55	35.8038	1681.55	35.8038	100.784	Gehrels et al. (2011)
Upper Bright Angel	UA	Upper Bright Angel-78	99.1439	0.69933	1646.72	63.7167	1683.82	30.5731	1683.82	30.5731	97.7967	Gehrels et al. (2011)
Upper Bright Angel	UA	Upper Bright Angel-27	203.542	0.519394	1489.12	27.969	1686.47	16.7201	1686.47	16.7201	88.2983	Gehrels et al. (2011)
Upper Bright Angel	UA	Upper Bright Angel-10	307.397	0.503163	1507.74	100.25	1686.61	12.8589	1686.61	12.8589	89.3946	Gehrels et al. (2011)
Upper Bright Angel	UA	Upper Bright Angel-100	101.395	0.598691	1679.92	49.2586	1687.07	17.0488	1687.07	17.0488	99.576	Gehrels et al. (2011)
Upper Bright Angel	UA	Upper Bright Angel-97	338.492	0.415088	1601.6	63.4534	1688.37	14.6516	1688.37	14.6516	94.8609	Gehrels et al. (2011)
Upper Bright Angel	UA	Upper Bright Angel-33	221.688	0.442464	1676.65	64.1844	1692.25	10.1354	1692.25	10.1354	99.0776	Gehrels et al. (2011)
Upper Bright Angel	UA	Upper Bright Angel-44	231.829	0.728684	1599.98	51.4126	1693.07	15.2472	1693.07	15.2472	94.5018	Gehrels et al. (2011)
Upper Bright Angel	UA	Upper Bright Angel-87	307.907	0.418069	1601.37	46.4388	1693.84	12.6417	1693.84	12.6417	94.5409	Gehrels et al. (2011)
Upper Bright Angel	UA	Upper Bright Angel-55	218.247	0.472156	1702.66	80.7787	1696.69	14.6513	1696.69	14.6513	100.352	Gehrels et al. (2011)
Upper Bright Angel	UA	Upper Bright Angel-79	96.6168	0.639783	1583.57	52.4825	1700.28	33.1026	1700.28	33.1026	93.1358	Gehrels et al. (2011)
Upper Bright Angel	UA	Upper Bright Angel-30	81.7476	0.352936	1711.95	95.8055	1700.66	25.4735	1700.66	25.4735	100.664	Gehrels et al. (2011)
Upper Bright Angel	UA	Upper Bright Angel-57	184.024	0.658251	1712.55	51.1185	1701	19.6885	1701	19.6885	100.679	Gehrels et al. (2011)
Upper Bright Angel	UA	Upper Bright Angel-81	147.846	1.1346	1670.51	58.217	1703.9	20.7424	1703.9	20.7424	98.0405	Gehrels et al. (2011)
Upper Bright Angel	UA	Upper Bright Angel-28	163.785	0.56039	1700.3	70.8659	1704.22	17.9033	1704.22	17.9033	99.7698	Gehrels et al. (2011)
Upper Bright Angel	UA	Upper Bright Angel-94	131.667	0.400257	1658.88	41.0504	1704.35	34.1552	1704.35	34.1552	97.3322	Gehrels et al. (2011)
Upper Bright Angel	UA	Upper Bright Angel-49	373.062	0.537551	1582.98	30.8794	1707.03	23.9092	1707.03	23.9092	92.7326	Gehrels et al. (2011)
Upper Bright Angel	UA	Upper Bright Angel-12	203.893	0.515558	1618.55	47.705	1707.99	14.1791	1707.99	14.1791	94.763	Gehrels et al. (2011)
Upper Bright Angel	UA	Upper Bright Angel-20	254.208	0.403312	1398.9	46.8959	1708.38	13.3926	1708.38	13.3926	81.8844	Gehrels et al. (2011)
Upper Bright Angel	UA	Upper Bright Angel-60	319.448	0.342577	1663.13	39.4158	1709.91	7.48354	1709.91	7.48354	97.2641	Gehrels et al. (2011)
Upper Bright Angel	UA	Upper Bright Angel-8	164.314	0.752632	1655.58	46.7933	1709.94	19.5353	1709.94	19.5353	96.8208	Gehrels et al. (2011)
Upper Bright Angel	UA	Upper Bright Angel-38	147.758	0.409281	1704.5	36.2045	1710.08	17.8119	1710.08	17.8119	99.6737	Gehrels et al. (2011)
Upper Bright Angel	UA	Upper Bright Angel-7	213.198	0.56198	1702.69	107.938	1710.66	15.2743	1710.66	15.2743	99.5343	Gehrels et al. (2011)
Upper Bright Angel	UA	Upper Bright Angel-15	192.187	0.290996	1735.1	40.6059	1711.92	10.5959	1711.92	10.5959	101.354	Gehrels et al. (2011)
Upper Bright Angel	UA	Upper Bright Angel-21	208.954	0.346869	1460.66	63.1905	1715.07	18.7508	1715.07	18.7508	85.1662	Gehrels et al. (2011)
Upper Bright Angel	UA	Upper Bright Angel-14	210.76	0.854523	1564.44	55.9828	1722.22	43.0532	1722.22	43.0532	90.8386	Gehrels et al. (2011)
Upper Bright Angel	UA	Upper Bright Angel-42	164.621	0.415341	1719.04	47.4562	1727.56	11.6014	1727.56	11.6014	99.5072	Gehrels et al. (2011)
Upper Bright Angel	UA	Upper Bright Angel-92	419.592	0.211883	1739.45	57.1999	1728.43	22.4148	1728.43	22.4148	100.638	Gehrels et al. (2011)
Upper Bright Angel	UA	Upper Bright Angel-90	292.868	0.229683	1708.16	100.834	1730.17	17.6419	1730.17	17.6419	98.728	Gehrels et al. (2011)
Upper Bright Angel	UA	Upper Bright Angel-23	177.477	0.271312	1704.72	44.3452	1736.95	9.91303	1736.95	9.91303	98.1441	Gehrels et al. (2011)
Upper Bright Angel	UA	Upper Bright Angel-51	69.4559	0.631689	1658.21	43.4864	1746.29	62.7884	1746.29	62.7884	94.9566	Gehrels et al. (2011)
Upper Bright Angel	UA	Upper Bright Angel-72	160.639	0.633208	1756.24	54.3133	1746.39	17.4149	1746.39	17.4149	100.564	Gehrels et al. (2011)
Upper Bright Angel	UA	Upper Bright Angel-46	218.634	0.424759	1546.64	46.161	1752.15	20.3595	1752.15	20.3595	88.2714	Gehrels et al. (2011)
Upper Bright Angel	UA	Upper Bright Angel-84	115.386	0.436111	1720.7	51.7114	1762.85	31.4969	1762.85	31.4969	97.6095	Gehrels et al. (2011)
Upper Bright Angel	UA	Upper Bright Angel-99	139.67	0.516425	1727.77	89.5692	1771.48	25.0798	1771.48	25.0798	97.5325	Gehrels et al. (2011)
Upper Bright Angel	UA	Upper Bright Angel-36	191.707	0.594519	1784.18	32.0733	1778.44	9.60967	1778.44	9.60967	100.323	Gehrels et al. (2011)
Upper Bright Angel	UA	Upper Bright Angel-77	243.362	0.267621	1778.27	43.0602	1780.6	9.82351	1780.6	9.82351	99.8692	Gehrels et al. (2011)
Upper Bright Angel	UA	Upper Bright Angel-34	224.384	0.419174	1750.1	41.639	1783.96	11.8783	1783.96	11.8783	98.1022	Gehrels et al. (2011)
Upper Bright Angel	UA	Upper Bright Angel-96	134.393	0.288949	1784.87	42.1395	1786.76	29.7987	1786.76	29.7987	99.8937	Gehrels et al. (2011)
Upper Bright Angel	UA	Upper Bright Angel-76	72.0539	0.0273572	1802.95	57.2244	1818.67	30.2324	1818.67	30.2324	99.1355	Gehrels et al. (2011)
Upper Bright Angel	UA	Upper Bright Angel-6	263.824	1.14196	1843.56	52.467	1866.55	10.1217	1866.55	10.1217	98.7686	Gehrels et al. (2011)
Upper Bright Angel	UA	Upper Bright Angel-98	126.907	0.65904	1856.22	83.8825	1939.85	14.4435	1939.85	14.4435	95.6887	Gehrels et al. (2011)
Upper Bright Angel	UA	Upper Bright Angel-13	266.039	0.355844	2419.13	60.4161	2430.11	8.23145	2430.11	8.23145	99.5481	Gehrels et al. (2011)
Upper Bright Angel	UA	Upper Bright Angel-4	64.4961	0.844315	2555.25	80.1365	2651.29	17.6017	2651.29	17.6017	96.3777	Gehrels et al. (2011)
Upper Bright Angel	UA	Upper Bright Angel-93	96.5619	1.00153	2640.91	62.1653	2768.45	14.0169	2768.45	14.0169	95.3934	Gehrels et al. (2011)
Upper Bright Angel	UA	Upper Bright Angel-75	22.3242	0.674752	2954.94	105.626	3005.86	33.4736	3005.86	33.4736	98.3058	Gehrels et al. (2011)
Temple Butte 1	UA	Temple Butte 1-54	772.009	0.378334	403.135	11.4892	909.854	67.5054	403.135	11.4892	44.3076	Gehrels et al. (2011)
Temple Butte 1	UA	Temple Butte 1-63	754.16	0.422965	425.536	13.4658	936.853	284.034	425.536	13.4658	45.4219	Gehrels et al. (2011)
Temple Butte 1	UA	Temple Butte 1-36	220.07	0.224606	509.404	14.7429	620.179	133.15	509.404	14.7429	82.1382	Gehrels et al. (2011)
Temple Butte 1	UA	Temple Butte 1-41	653.919	0.189897	514.946	13.3132	537.095	41.7782	514.946	13.3132	95.8761	Gehrels et al. (2011)
Temple Butte 1	UA	Temple Butte 1-47	194.626	0.338431	517.77	17.7118	492.037	213.212	517.77	17.7118	105.23	Gehrels et al. (2011)
Temple Butte 1	UA	Temple Butte 1-67	130.416	0.31903	583.267	13.2165	492.857	205.099	583.267	13.2165	118.344	Gehrels et al. (2011)
Temple Butte 1	UA	Temple Butte 1-70	22.0939	0.670482	1234.72	31.1267	1243.05	46.8595	1243.05	46.8595	99.3302	Gehrels et al. (2011)
Temple Butte 1	UA	Temple Butte 1-48	368.053	0.342523	1301.65	35.4778	1332.7	30.0013	1332.7	30.0013	97.67	Gehrels et al. (2011)
Temple Butte 1	UA	Temple Butte 1-66	248.863	0.637615	1360.32	36.4237	1352.97	30.8612	1352.97	30.8612	100.543	Gehrels et al. (2011)
Temple Butte 1	UA	Temple Butte 1-75	234.109	0.287166	1337.71	51.4635	1359.91	38.4097	1359.91	38.4097	98.3679	Gehrels et al. (2011)
Temple Butte 1	UA	Temple Butte 1-8	287.042	0.231576	1320.07	29.3648	1367.24	37.3593	1367.24	37.3593	96.5497	Gehrels et al. (2011)
Temple Butte 1	UA	Temple Butte 1-28	280.445	0.265995	1365.77	23.6312	1369.57	48.55	1369.57	48.55	99.722	Gehrels et al. (2011)
Temple Butte 1	UA	Temple Butte 1-72	212.373	0.392359	1384.64	53.7054	1373.23	30.8345	1373.23	30.8345	100.831	Gehrels et al. (2011)
Temple Butte 1	UA	Temple Butte 1-14	36.5931	0.107141	1405.43	33.9693	1429.25	49.5019	1429.25	49.5019	98.3332	Gehrels et al. (2011)
Temple Butte 1	UA	Temple Butte 1-34	206.133	0.475183	1459.17	44.5288	1436.75	38.0644	1436.75	38.0644	101.56	Gehrels et al. (2011)
Temple Butte 1	UA	Temple Butte 1-32	23.9095	0.701756	1379.92	37.2676	1440.01	31.5011	1440.01	31.5011	95.8269	Gehrels et al. (2011)
Temple Butte 1	UA	Temple Butte 1-26	473.894	0.335877	1420.98	12.2426	1452.09	33.317	1452.09	33.317	97.8579	Gehrels et al. (2011)
Temple Butte 1	UA	Temple Butte 1-30	369.459	0.512749	1186.62	76.5206	1452.68	59.1403	1452.68	59.1403	81.6848	Gehrels et al. (2011)
Temple Butte 1	UA	Temple Butte 1-5	403.342	0.441475	1424.38	20.7035	1457.02	41.0845	1457.02	41.0845	97.7596	Gehrels et al. (2011)
Temple Butte 1	UA	Temple Butte 1-7	236.973	0.578393	1372.68	32.3933	1488.02	49.8686	1488.02	49.8686	92.2484	Gehrels et al. (2011)
Temple Butte 1	UA	Temple Butte 1-84	153.098	0.818749	1461.72	52.5766	1491.56	88.9214	1491.56	88.9214	97.9998	Gehrels et al. (2011)
Temple Butte 1	UA	Temple Butte 1-4	256.561	0.526722	1286.11	51.8853	1496.05	63.4377	1496.05	63.4377	85.9669	Gehrels et al. (2011)
Temple Butte 1	UA	Temple Butte 1-74	300.263	0.25964	1316.33	24.0509	1502.01	24.3074	1502.01	24.3074	87.6375	Gehrels et al. (2011)
Temple Butte 1	UA	Temple Butte 1-13	176.393	0.25773	1585.91	52.441	1529.91	76.6851	1529.91	76.6851	103.66	Gehrels et al. (2011)
Temple Butte 1	UA	Temple Butte 1-22	126.35	0.0689794	1628.8	29.938	1588.99	67.1083	1588.99	67.1083	102.506	Gehrels et al. (2011)
Temple Butte 1	UA	Temple Butte 1-59	40.7868	0.176842	1652.81	55.6954	1635.55	146.729	1635.55	146.729	101.056	Gehrels et al. (2011)
Temple Butte 1	UA	Temple Butte 1-64	87.2761	0.39099	1703.67	20.2115	1648.29	120.169	1648.29	120.169	103.36	Gehrels et al. (2011)
Temple Butte 1	UA	Temple Butte 1-23	26.2877	0.213316	1657.12	32.002	1655.28	52.6661	1655.28	52.6661	100.111	Gehrels et al. (2011)
Temple Butte 1	UA	Temple Butte 1-52	91.8534	0.316788	1630.03	73.3129	1655.78	65.1184	1655.78	65.1184	98.4449	Gehrels et al. (2011)
Temple Butte 1	UA	Temple Butte 1-1	127.014	0.455805	1576.9	61.8307	1658.58	53.3863	1658.58	53.3863	95.0751	Gehrels et al. (2011)
Temple Butte 1	UA	Temple Butte 1-71	181.891	0.349868	1675.93	49.4401	1659.47	42.6526	1659.47	42.6526	100.992	Gehrels et al. (2011)
Temple Butte 1	UA	Temple Butte 1-77	433.286	0.451956	1665.44	43.7381	1661.14	54.3586	1661.14	54.3586	100.259	Gehrels et al. (2011)
Temple Butte 1	UA	Temple Butte 1-38	12.1977	0.258785	1621.09	26.947	1662.54	28.5412	1662.54	28.5412	97.5065	Gehrels et al. (2011)
Temple Butte 1	UA	Temple Butte 1-46	152.151	0.346475	1712.12	19.9982	1665.74	67.987	1665.74	67.987	102.784	Gehrels et al. (2011)
Temple Butte 1	UA	Temple Butte 1-85	183.784	0.103474	1719.32	71.9887	1667.2	82.5028	1667.2	82.5028	103.126	Gehrels et al. (2011)
Temple Butte 1	UA	Temple Butte 1-60	153.89	0.66965	1579.57	68.3682	1674.46	46.2825	1674.46	46.2825	94.3335	Gehrels et al. (2011)
Temple Butte 1	UA	Temple Butte 1-27	52.2941	0.514519	1639.13	34.3021	1680.59	122.267	1680.59	122.267	97.5327	Gehrels et al. (2011)
Temple Butte 1	UA	Temple Butte 1-6	135.3	0.325948	1729.22	26.9977	1684.12	49.6728	1684.12	49.6728	102.678	Gehrels et al. (2011)
Temple Butte 1	UA	Temple Butte 1-49	332.15	0.235396	1651.09	31.0259	1691.73	21.5829	1691.73	21.5829	97.5981	Gehrels et al. (2011)
Temple Butte 1	UA	Temple Butte 1-24	251.318	0.874378	1697	62.8157	1693.69	27.8537	1693.69	27.8537	100.196	Gehrels et al. (2011)
Temple Butte 1	UA	Temple Butte 1-93	142.051	0.309659	1724.47	72.4796	1693.8	40.7816	1693.8	40.7816	101.811	Gehrels et al. (2011)
Temple Butte 1	UA	Temple Butte 1-21	143.329	0.442416	1655.73	53.1521	1694.91	31.1997	1694.91	31.1997	97.6882	Gehrels et al. (2011)
Temple Butte 1	UA	Temple Butte 1-69	122.974	0.38781	1722.63	59.8639	1699.24	50.5811	1699.24	50.5811	101.376	Gehrels et al. (2011)
Temple Butte 1	UA	Temple Butte 1-99	202.272	0.245116	1736.48	65.0029	1700.45	53.1261	1700.45	53.1261	102.119	Gehrels et al. (2011)
Temple Butte 1	UA	Temple Butte 1-50	298.115	0.418823	1676.78	42.9651	1703.65	26.3418	1703.65	26.3418	98.4226	Gehrels et al. (2011)
Temple Butte 1	UA	Temple Butte 1-61	163.096	0.329944	1733.14	69.1493	1703.78	34.6377	1703.78	34.6377	101.723	Gehrels et al. (2011)
Temple Butte 1	UA	Temple Butte 1-10	102.977	0.475963	1680.31	34.0211	1705.27	42.9343	1705.27	42.9343	98.536	Gehrels et al. (2011)
Temple Butte 1	UA	Temple Butte 1-51	429.246	0.283128	1682.79	28.8812	1707.3	36.2627	1707.3	36.2627	98.5645	Gehrels et al. (2011)
Temple Butte 1	UA	Temple Butte 1-44	157.956	0.326326	1717.91	53.3864	1707.62	33.578	1707.62	33.578	100.603	Gehrels et al. (2011)
Temple Butte 1	UA	Temple Butte 1-42	117.476	0.625667	1744.37	27.2036	1708.31	39.403	1708.31	39.403	102.111	Gehrels et al. (2011)
Temple Butte 1	UA	Temple Butte 1-83	77.789	0.540207	1561.84	23.1637	1713.84	37.6846	1713.84	37.6846	91.1312	Gehrels et al. (2011)
Temple Butte 1	UA	Temple Butte 1-68	210.174	0.483129	1545.26	56.6107	1714.72	38.1416	1714.72	38.1416	90.1178	Gehrels et al. (2011)
Temple Butte 1	UA	Temple Butte 1-31	327.138	0.307966	1510.3	149.884	1724.36	47.3225	1724.36	47.3225	87.5859	Gehrels et al. (2011)
Temple Butte 1	UA	Temple Butte 1-87	226.974	0.305516	1514.65	58.4505	1725.14	33.0124	1725.14	33.0124	87.7983	Gehrels et al. (2011)
Temple Butte 1	UA	Temple Butte 1-92	225.875	0.393332	1728.84	31.9967	1725.64	45.3677	1725.64	45.3677	100.185	Gehrels et al. (2011)
Temple Butte 1	UA	Temple Butte 1-81	230.656	0.339959	1671.12	55.9405	1725.89	36.2391	1725.89	36.2391	96.8266	Gehrels et al. (2011)
Temple Butte 1	UA	Temple Butte 1-56	325.221	0.270042	1608.66	20.7854	1730.07	39.0118	1730.07	39.0118	92.9825	Gehrels et al. (2011)
Temple Butte 1	UA	Temple Butte 1-53	192.58	0.29552	1736.17	47.0314	1730.2	41.6906	1730.2	41.6906	100.345	Gehrels et al. (2011)
Temple Butte 1	UA	Temple Butte 1-94	42.1421	0.0179899	1698.68	100.806	1730.71	54.5395	1730.71	54.5395	98.1488	Gehrels et al. (2011)
Temple Butte 1	UA	Temple Butte 1-65	116.479	0.508712	1766.23	66.2798	1732.61	51.6161	1732.61	51.6161	101.94	Gehrels et al. (2011)
Temple Butte 1	UA	Temple Butte 1-37	137.908	0.504473	1705.65	76.5849	1734.96	64.5935	1734.96	64.5935	98.3108	Gehrels et al. (2011)
Temple Butte 1	UA	Temple Butte 1-33	447.479	0.439395	1694.75	58.5695	1738.81	27.877	1738.81	27.877	97.4661	Gehrels et al. (2011)
Temple Butte 1	UA	Temple Butte 1-16	190.509	0.432032	1736.63	31.0567	1739.01	33.3844	1739.01	33.3844	99.8633	Gehrels et al. (2011)
Temple Butte 1	UA	Temple Butte 1-88	338.032	0.323083	1497.37	43.5604	1739.12	54.6336	1739.12	54.6336	86.0995	Gehrels et al. (2011)
Temple Butte 1	UA	Temple Butte 1-17	391.374	0.292083	1728.27	20.011	1739.94	15.6021	1739.94	15.6021	99.3292	Gehrels et al. (2011)
Temple Butte 1	UA	Temple Butte 1-98	100.497	0.338803	1737.51	35.7919	1740.42	33.4016	1740.42	33.4016	99.8324	Gehrels et al. (2011)
Temple Butte 1	UA	Temple Butte 1-86	86.9437	0.585903	1684.95	16.0139	1742.48	56.6926	1742.48	56.6926	96.6981	Gehrels et al. (2011)
Temple Butte 1	UA	Temple Butte 1-12	273.208	0.182166	1513.67	41.8224	1743.02	25.3379	1743.02	25.3379	86.8419	Gehrels et al. (2011)
Temple Butte 1	UA	Temple Butte 1-3	282.976	0.365643	1661.78	76.7627	1743.05	56.0992	1743.05	56.0992	95.3372	Gehrels et al. (2011)
Temple Butte 1	UA	Temple Butte 1-39	282.772	0.304166	1706.74	50.5339	1748.16	26.5788	1748.16	26.5788	97.6309	Gehrels et al. (2011)
Temple Butte 1	UA	Temple Butte 1-73	316.501	0.237364	1698.53	29.5653	1752.21	22.554	1752.21	22.554	96.9366	Gehrels et al. (2011)
Temple Butte 1	UA	Temple Butte 1-43	651.847	0.494686	1534.34	31.5435	1755.12	45.2733	1755.12	45.2733	87.421	Gehrels et al. (2011)
Temple Butte 1	UA	Temple Butte 1-35	145.605	0.0262925	1745.92	24.0128	1762.69	84.6741	1762.69	84.6741	99.049	Gehrels et al. (2011)
Temple Butte 1	UA	Temple Butte 1-97	420.986	0.365881	1715.25	98.3506	1765.52	23.6174	1765.52	23.6174	97.153	Gehrels et al. (2011)
Temple Butte 1	UA	Temple Butte 1-45	329.159	0.4435	1679.37	56.6258	1768.41	42.6863	1768.41	42.6863	94.9648	Gehrels et al. (2011)
Temple Butte 1	UA	Temple Butte 1-96	113.103	0.17207	1763.11	41.804	1772.26	15.3804	1772.26	15.3804	99.484	Gehrels et al. (2011)
Temple Butte 1	UA	Temple Butte 1-19	194.319	0.445537	1461.66	52.0513	1772.28	46.6127	1772.28	46.6127	82.4733	Gehrels et al. (2011)
Temple Butte 1	UA	Temple Butte 1-62	130.569	0.417349	1763.72	45.0571	1773.84	26.2491	1773.84	26.2491	99.4293	Gehrels et al. (2011)
Temple Butte 1	UA	Temple Butte 1-95	338.313	0.299245	1688.19	48.8653	1774.53	37.7921	1774.53	37.7921	95.1347	Gehrels et al. (2011)
Temple Butte 1	UA	Temple Butte 1-40	114.484	0.387851	1731.15	34.3114	1779.72	54.2001	1779.72	54.2001	97.2709	Gehrels et al. (2011)
Temple Butte 1	UA	Temple Butte 1-82	577.613	0.366309	1657.61	71.185	1806.08	36.7502	1806.08	36.7502	91.7795	Gehrels et al. (2011)
Temple Butte 1	UA	Temple Butte 1-55	311.642	0.208446	1570.65	61.7536	1810.37	65.1738	1810.37	65.1738	86.7582	Gehrels et al. (2011)
Temple Butte 1	UA	Temple Butte 1-2	363.936	0.407142	1748.56	33.0805	1815.8	70.6179	1815.8	70.6179	96.2968	Gehrels et al. (2011)
Temple Butte 1	UA	Temple Butte 1-11	234.39	0.301331	1832.58	38.6024	1819.75	43.207	1819.75	43.207	100.705	Gehrels et al. (2011)
Temple Butte 1	UA	Temple Butte 1-25	587.023	0.488929	1651.84	48.2337	1823.96	39.8378	1823.96	39.8378	90.5633	Gehrels et al. (2011)
Temple Butte 1	UA	Temple Butte 1-89	383.524	0.217462	1843.05	44.0835	1845.58	37.5039	1845.58	37.5039	99.863	Gehrels et al. (2011)
Temple Butte 1	UA	Temple Butte 1-20	261.803	0.565541	1853.15	29.4738	1853.67	18.6336	1853.67	18.6336	99.9722	Gehrels et al. (2011)
Temple Butte 1	UA	Temple Butte 1-79	201.658	0.259167	1697.48	94.7728	1860.6	51.9347	1860.6	51.9347	91.2328	Gehrels et al. (2011)
Temple Butte 1	UA	Temple Butte 1-15	374.19	0.286713	1815.57	91.3054	1874.21	78.2678	1874.21	78.2678	96.8713	Gehrels et al. (2011)
Temple Butte 1	UA	Temple Butte 1-90	258.402	0.343966	1760.28	11.091	1882.52	38.4216	1882.52	38.4216	93.5065	Gehrels et al. (2011)
Temple Butte 1	UA	Temple Butte 1-100	486.782	0.312856	1751.41	66.563	1894.82	43.8365	1894.82	43.8365	92.4312	Gehrels et al. (2011)
Temple Butte 1	UA	Temple Butte 1-78	377.489	0.476615	1901.96	29.484	1904.27	34.4985	1904.27	34.4985	99.8785	Gehrels et al. (2011)
Temple Butte 1	UA	Temple Butte 1-29	120.085	0.921735	1784.63	42.2754	1923.09	75.9392	1923.09	75.9392	92.8001	Gehrels et al. (2011)
Temple Butte 1	UA	Temple Butte 1-57	877.569	0.484575	1820.21	69.3025	1932.55	43.6744	1932.55	43.6744	94.1869	Gehrels et al. (2011)
Temple Butte 1	UA	Temple Butte 1-91	626.838	0.477648	1645.56	34.7109	1941.66	23.748	1941.66	23.748	84.7502	Gehrels et al. (2011)
Temple Butte 1	UA	Temple Butte 1-9	304.635	0.599529	1879.14	26.2446	1943.29	42.9427	1943.29	42.9427	96.6991	Gehrels et al. (2011)
Temple Butte 1	UA	Temple Butte 1-80	557.079	0.573481	1801.39	26.7192	1958.52	45.4905	1958.52	45.4905	91.9769	Gehrels et al. (2011)
Temple Butte 1	UA	Temple Butte 1-58	537.696	0.50033	1909.69	22.5025	1989.24	58.0084	1989.24	58.0084	96.0012	Gehrels et al. (2011)
Temple Butte 1	UA	Temple Butte 1-18	113.129	0.0759964	1910.19	74.4004	1999.39	34.9911	1999.39	34.9911	95.5388	Gehrels et al. (2011)
Temple Butte 1	UA	Temple Butte 1-76	168.338	0.39577	2525.41	98.422	2526.23	26.3622	2526.23	26.3622	99.9676	Gehrels et al. (2011)
Temple Butte 2	UA	TempleButte2-59	53.9827	0.575271	501.947	16.0807	407.742	94.3203	501.947	16.0807	123.104	Gehrels et al. (2011)
Temple Butte 2	UA	TempleButte2-102	586.614	0.313203	520.024	11.4409	536.714	45.1607	520.024	11.4409	96.8903	Gehrels et al. (2011)
Temple Butte 2	UA	TempleButte2-103	653.744	0.600498	521.057	10.6118	512.595	26.2078	521.057	10.6118	101.651	Gehrels et al. (2011)
Temple Butte 2	UA	TempleButte2-100	131.411	0.570499	1028.81	28.5275	1037.31	34.4895	1037.31	34.4895	99.1804	Gehrels et al. (2011)
Temple Butte 2	UA	TempleButte2-29	54.5314	0.427731	1118.9	28.864	1104.9	72.5491	1104.9	72.5491	101.268	Gehrels et al. (2011)
Temple Butte 2	UA	TempleButte2-81	37.3954	0.537079	1122.8	15.7662	1130.85	62.5353	1130.85	62.5353	99.2876	Gehrels et al. (2011)
Temple Butte 2	UA	TempleButte2-92	31.9507	0.759606	1377.75	24.6863	1338.12	117.451	1338.12	117.451	102.962	Gehrels et al. (2011)
Temple Butte 2	UA	TempleButte2-28	195.123	0.386296	1352.77	7.56562	1343.2	30.9404	1343.2	30.9404	100.712	Gehrels et al. (2011)
Temple Butte 2	UA	TempleButte2-30	119.171	0.56678	1336.91	13.1606	1352.02	32.93	1352.02	32.93	98.8822	Gehrels et al. (2011)
Temple Butte 2	UA	TempleButte2-66	148.273	0.41843	1317.92	43.6253	1362.66	42.0159	1362.66	42.0159	96.717	Gehrels et al. (2011)
Temple Butte 2	UA	TempleButte2-32	179.443	0.427199	1358.04	21.6742	1364.26	30.1336	1364.26	30.1336	99.5439	Gehrels et al. (2011)
Temple Butte 2	UA	TempleButte2-91	201.158	1.02914	1373.93	31.5537	1368.52	44.9249	1368.52	44.9249	100.396	Gehrels et al. (2011)
Temple Butte 2	UA	TempleButte2-88	232.371	0.36287	1389.31	8.49866	1371.09	29.2616	1371.09	29.2616	101.329	Gehrels et al. (2011)
Temple Butte 2	UA	TempleButte2-96	57.1483	0.636139	1381.49	19.5229	1371.72	61.7703	1371.72	61.7703	100.712	Gehrels et al. (2011)
Temple Butte 2	UA	TempleButte2-64	195.144	0.355464	1350.81	13.1617	1376.43	28.1012	1376.43	28.1012	98.1388	Gehrels et al. (2011)
Temple Butte 2	UA	TempleButte2-11	134.471	0.440792	1372.44	25.5891	1382.45	22.3381	1382.45	22.3381	99.2759	Gehrels et al. (2011)
Temple Butte 2	UA	TempleButte2-7	189.214	0.510928	1390.07	18.6312	1389.3	31.3413	1389.3	31.3413	100.055	Gehrels et al. (2011)
Temple Butte 2	UA	TempleButte2-31	223.57	0.348316	1338.78	10.3966	1406.9	34.0948	1406.9	34.0948	95.1578	Gehrels et al. (2011)
Temple Butte 2	UA	TempleButte2-40	150.025	0.374395	1394.04	24.1948	1413.74	42.9135	1413.74	42.9135	98.6062	Gehrels et al. (2011)
Temple Butte 2	UA	TempleButte2-52	153.085	0.360296	1387.25	15.7266	1414.68	18.4645	1414.68	18.4645	98.061	Gehrels et al. (2011)
Temple Butte 2	UA	TempleButte2-80	117.947	0.493388	1422.79	15.4483	1425.15	38.0716	1425.15	38.0716	99.8343	Gehrels et al. (2011)
Temple Butte 2	UA	TempleButte2-86	75.6771	0.701177	1435.11	20.5856	1427.87	28.0683	1427.87	28.0683	100.507	Gehrels et al. (2011)
Temple Butte 2	UA	TempleButte2-17	142.744	0.279038	1435.41	25.4794	1432.96	29.4704	1432.96	29.4704	100.171	Gehrels et al. (2011)
Temple Butte 2	UA	TempleButte2-22	111.743	0.628322	1421.51	27.4276	1433.44	35.8527	1433.44	35.8527	99.1676	Gehrels et al. (2011)
Temple Butte 2	UA	TempleButte2-78	29.355	0.585296	1448.9	15.7015	1434.13	54.0699	1434.13	54.0699	101.03	Gehrels et al. (2011)
Temple Butte 2	UA	TempleButte2-20	190.311	0.52359	1397.64	40.9628	1436.97	30.4217	1436.97	30.4217	97.2633	Gehrels et al. (2011)
Temple Butte 2	UA	TempleButte2-99	341.412	0.703157	1447.89	22.4349	1444.08	31.4395	1444.08	31.4395	100.264	Gehrels et al. (2011)
Temple Butte 2	UA	TempleButte2-18	219.666	0.563799	1443.92	28.7189	1445.23	31.4519	1445.23	31.4519	99.9092	Gehrels et al. (2011)
Temple Butte 2	UA	TempleButte2-39	124.722	0.310969	1440.64	25.6913	1448.97	31.8841	1448.97	31.8841	99.4252	Gehrels et al. (2011)
Temple Butte 2	UA	TempleButte2-4	115.774	0.472037	1368.48	14.1794	1449.83	41.0401	1449.83	41.0401	94.3889	Gehrels et al. (2011)
Temple Butte 2	UA	TempleButte2-5	150.236	0.676514	1384.09	15.4454	1455.86	27.4266	1455.86	27.4266	95.0708	Gehrels et al. (2011)
Temple Butte 2	UA	TempleButte2-74	30.9166	0.573201	1454.4	35.936	1458.65	69.3586	1458.65	69.3586	99.708	Gehrels et al. (2011)
Temple Butte 2	UA	TempleButte2-79	112.123	0.449776	1469.71	28.1243	1460.4	47.7446	1460.4	47.7446	100.637	Gehrels et al. (2011)
Temple Butte 2	UA	TempleButte2-58	240.094	0.788153	1465.54	24.1205	1460.54	37.0859	1460.54	37.0859	100.343	Gehrels et al. (2011)
Temple Butte 2	UA	TempleButte2-82	138.734	0.697076	1457.5	17.4801	1463.51	32.1632	1463.51	32.1632	99.5891	Gehrels et al. (2011)
Temple Butte 2	UA	TempleButte2-47	227.77	0.150421	1417.27	16.6671	1466.02	24.728	1466.02	24.728	96.6746	Gehrels et al. (2011)
Temple Butte 2	UA	TempleButte2-14	191.177	0.441589	1372.77	7.66621	1467.09	39.8967	1467.09	39.8967	93.5707	Gehrels et al. (2011)
Temple Butte 2	UA	TempleButte2-35	201.834	0.662613	1348.64	18.3755	1469.82	37.801	1469.82	37.801	91.756	Gehrels et al. (2011)
Temple Butte 2	UA	TempleButte2-13	303.764	0.648736	1271.7	48.7048	1490.39	23.3522	1490.39	23.3522	85.3266	Gehrels et al. (2011)
Temple Butte 2	UA	TempleButte2-93	221.017	0.494528	1279.11	11.7186	1546.94	67.2749	1546.94	67.2749	82.6867	Gehrels et al. (2011)
Temple Butte 2	UA	TempleButte2-24	695.255	0.360683	1652.85	74.7969	1645.4	24.1703	1645.4	24.1703	100.453	Gehrels et al. (2011)
Temple Butte 2	UA	TempleButte2-98	79.6446	0.686168	1681.4	34.0404	1649.38	53.2423	1649.38	53.2423	101.941	Gehrels et al. (2011)
Temple Butte 2	UA	TempleButte2-85	26.1683	0.82813	1701.97	32.3106	1662.69	63.6903	1662.69	63.6903	102.362	Gehrels et al. (2011)
Temple Butte 2	UA	TempleButte2-15	184.17	0.860693	1519.98	12.7287	1672.47	53.9807	1672.47	53.9807	90.8822	Gehrels et al. (2011)
Temple Butte 2	UA	TempleButte2-105	165.093	0.249443	1626.62	25.1585	1672.73	30.3425	1672.73	30.3425	97.2437	Gehrels et al. (2011)
Temple Butte 2	UA	TempleButte2-23	85.8068	0.437051	1677.05	25.1033	1678.71	32.4717	1678.71	32.4717	99.9012	Gehrels et al. (2011)
Temple Butte 2	UA	TempleButte2-97	99.1653	0.2427	1630.12	29.3833	1683.27	18.6599	1683.27	18.6599	96.8424	Gehrels et al. (2011)
Temple Butte 2	UA	TempleButte2-50	137.088	0.276023	1635.89	25.14	1687.2	30.6517	1687.2	30.6517	96.959	Gehrels et al. (2011)
Temple Butte 2	UA	TempleButte2-84	165.219	0.277242	1671.84	20.6169	1687.31	24.9257	1687.31	24.9257	99.083	Gehrels et al. (2011)
Temple Butte 2	UA	TempleButte2-56	130.947	0.393109	1638.36	21.9905	1689.73	38.2059	1689.73	38.2059	96.9599	Gehrels et al. (2011)
Temple Butte 2	UA	TempleButte2-95	99.7351	0.521209	1705.3	27.121	1691.96	40.6277	1691.96	40.6277	100.788	Gehrels et al. (2011)
Temple Butte 2	UA	TempleButte2-55	140.655	0.415895	1654.65	31.0845	1693.33	30.0808	1693.33	30.0808	97.7157	Gehrels et al. (2011)
Temple Butte 2	UA	TempleButte2-101	420.234	0.648782	1687.48	23.4582	1693.44	18.2588	1693.44	18.2588	99.648	Gehrels et al. (2011)
Temple Butte 2	UA	TempleButte2-63	164.08	0.441278	1700.63	33.4838	1697.41	34.4859	1697.41	34.4859	100.189	Gehrels et al. (2011)
Temple Butte 2	UA	TempleButte2-83	155.448	0.48706	1670.69	19.4272	1702.7	30.7875	1702.7	30.7875	98.1205	Gehrels et al. (2011)
Temple Butte 2	UA	TempleButte2-37	106.657	0.261731	1665.4	47.5531	1703.3	21.3978	1703.3	21.3978	97.7745	Gehrels et al. (2011)
Temple Butte 2	UA	TempleButte2-77	139.072	0.449269	1706.44	49.7763	1705.7	28.9527	1705.7	28.9527	100.043	Gehrels et al. (2011)
Temple Butte 2	UA	TempleButte2-61	96.5907	0.659441	1713.97	34.9171	1706.14	26.7402	1706.14	26.7402	100.458	Gehrels et al. (2011)
Temple Butte 2	UA	TempleButte2-12	234.671	0.242227	1739.42	34.759	1708.03	37.5735	1708.03	37.5735	101.837	Gehrels et al. (2011)
Temple Butte 2	UA	TempleButte2-104	24.881	0.294395	1687.96	26.5829	1710.51	76.9105	1710.51	76.9105	98.6817	Gehrels et al. (2011)
Temple Butte 2	UA	TempleButte2-75	133.121	0.563427	1683.8	21.7833	1716.38	24.1898	1716.38	24.1898	98.1013	Gehrels et al. (2011)
Temple Butte 2	UA	TempleButte2-57	273.438	0.319234	1712.47	13.0838	1717.81	29.4149	1717.81	29.4149	99.6887	Gehrels et al. (2011)
Temple Butte 2	UA	TempleButte2-45	89.7109	1.03586	1593.62	51.3948	1719.48	51.1288	1719.48	51.1288	92.6802	Gehrels et al. (2011)
Temple Butte 2	UA	TempleButte2-62	187.948	0.425648	1630.65	18.4418	1722.12	36.6038	1722.12	36.6038	94.6887	Gehrels et al. (2011)
Temple Butte 2	UA	TempleButte2-25	316.025	0.472321	1671.27	20.3163	1723.26	20.956	1723.26	20.956	96.9829	Gehrels et al. (2011)
Temple Butte 2	UA	TempleButte2-2	291.439	0.341791	1699.59	24.3523	1727.38	24.9899	1727.38	24.9899	98.3911	Gehrels et al. (2011)
Temple Butte 2	UA	TempleButte2-65	163.552	0.240648	1671.39	21.0538	1727.7	29.8034	1727.7	29.8034	96.7406	Gehrels et al. (2011)
Temple Butte 2	UA	TempleButte2-43	56.0509	0.217402	1721.21	30.2119	1735.76	34.3461	1735.76	34.3461	99.1615	Gehrels et al. (2011)
Temple Butte 2	UA	TempleButte2-67	266.706	0.348808	1741.17	44.0974	1738.77	33.7483	1738.77	33.7483	100.138	Gehrels et al. (2011)
Temple Butte 2	UA	TempleButte2-54	166.549	0.299147	1659.48	24.4338	1739.36	30.9964	1739.36	30.9964	95.4076	Gehrels et al. (2011)
Temple Butte 2	UA	TempleButte2-33	202.361	0.256548	1733.3	34.6524	1739.47	25.3099	1739.47	25.3099	99.6449	Gehrels et al. (2011)
Temple Butte 2	UA	TempleButte2-53	245.265	0.289155	1733.81	19.0028	1743.04	39.2165	1743.04	39.2165	99.4705	Gehrels et al. (2011)
Temple Butte 2	UA	TempleButte2-70	376.275	0.275854	1464.88	34.3319	1743.24	34.0698	1743.24	34.0698	84.0321	Gehrels et al. (2011)
Temple Butte 2	UA	TempleButte2-44	208.038	0.489359	1719.08	29.4248	1743.41	32.4321	1743.41	32.4321	98.6048	Gehrels et al. (2011)
Temple Butte 2	UA	TempleButte2-36	110.519	0.436145	1738.92	34.2932	1749.85	27.8669	1749.85	27.8669	99.3758	Gehrels et al. (2011)
Temple Butte 2	UA	TempleButte2-89	57.7814	0.348175	1601.06	45.5097	1751.26	35.0363	1751.26	35.0363	91.4236	Gehrels et al. (2011)
Temple Butte 2	UA	TempleButte2-41	355.425	0.171328	1695.27	27.2796	1752.79	12.6356	1752.79	12.6356	96.7184	Gehrels et al. (2011)
Temple Butte 2	UA	TempleButte2-46	40.5609	0.277125	1711.43	32.6173	1753.02	33.2864	1753.02	33.2864	97.6275	Gehrels et al. (2011)
Temple Butte 2	UA	TempleButte2-19	78.1884	0.292703	1750.4	22.0736	1754.2	26.4141	1754.2	26.4141	99.7834	Gehrels et al. (2011)
Temple Butte 2	UA	TempleButte2-87	119.425	0.499721	1746.18	26.3104	1754.22	18.0059	1754.22	18.0059	99.5419	Gehrels et al. (2011)
Temple Butte 2	UA	TempleButte2-94	243.788	0.510229	1577.42	23.0877	1754.75	29.1162	1754.75	29.1162	89.8944	Gehrels et al. (2011)
Temple Butte 2	UA	TempleButte2-71	202.994	0.251923	1637.43	19.5213	1756.14	19.0438	1756.14	19.0438	93.2399	Gehrels et al. (2011)
Temple Butte 2	UA	TempleButte2-9	95.0501	0.313579	1770.94	34.0677	1762.28	29.2795	1762.28	29.2795	100.491	Gehrels et al. (2011)
Temple Butte 2	UA	TempleButte2-73	188.581	0.218553	1611.07	82.685	1763.3	47.5627	1763.3	47.5627	91.3664	Gehrels et al. (2011)
Temple Butte 2	UA	TempleButte2-68	183.115	0.130327	1759.8	27.7209	1766.72	32.1645	1766.72	32.1645	99.6084	Gehrels et al. (2011)
Temple Butte 2	UA	TempleButte2-42	235.642	0.29509	1721.83	16.4705	1766.86	20.8397	1766.86	20.8397	97.4511	Gehrels et al. (2011)
Temple Butte 2	UA	TempleButte2-38	182.735	0.298141	1763.26	32.0879	1767.7	29.2554	1767.7	29.2554	99.749	Gehrels et al. (2011)
Temple Butte 2	UA	TempleButte2-1	474.195	0.371011	1537.8	27.3628	1780.06	37.419	1780.06	37.419	86.3903	Gehrels et al. (2011)
Temple Butte 2	UA	TempleButte2-34	243.323	0.252619	1756.97	37.6786	1780.42	22.6353	1780.42	22.6353	98.6826	Gehrels et al. (2011)
Temple Butte 2	UA	TempleButte2-3	234.122	0.28648	1794.5	49.812	1783.98	37.215	1783.98	37.215	100.59	Gehrels et al. (2011)
Temple Butte 2	UA	TempleButte2-27	99.0387	0.559639	1791.14	46.4467	1785.63	15.31	1785.63	15.31	100.308	Gehrels et al. (2011)
Temple Butte 2	UA	TempleButte2-16	214.411	0.339422	1746.27	26.6175	1789.33	22.0492	1789.33	22.0492	97.5939	Gehrels et al. (2011)
Temple Butte 2	UA	TempleButte2-6	324.129	0.504668	1760.01	18.7905	1817.64	29.2353	1817.64	29.2353	96.8296	Gehrels et al. (2011)
Temple Butte 2	UA	TempleButte2-48	252.145	0.348871	1804.23	54.6102	1841.88	23.0043	1841.88	23.0043	97.9563	Gehrels et al. (2011)
Temple Butte 2	UA	TempleButte2-69	225.639	0.477966	1763	39.7964	1855.95	35.4247	1855.95	35.4247	94.9918	Gehrels et al. (2011)
Temple Butte 2	UA	TempleButte2-51	103.196	0.59041	1916.93	46.0984	1927.12	21.7075	1927.12	21.7075	99.4714	Gehrels et al. (2011)
Temple Butte 2	UA	TempleButte2-49	83.3799	0.76028	1865.5	21.7058	1944.99	30.2592	1944.99	30.2592	95.913	Gehrels et al. (2011)
Temple Butte 2	UA	TempleButte2-90	99.4186	0.801619	1991.04	43.8513	2083.6	27.9898	2083.6	27.9898	95.5573	Gehrels et al. (2011)
Temple Butte 2	UA	TempleButte2-60	293.634	0.562827	2293.29	25.6656	2434.77	29.8255	2434.77	29.8255	94.1894	Gehrels et al. (2011)
Temple Butte 2	UA	TempleButte2-26	110.519	0.534186	2498.52	33.5548	2536.49	18.1286	2536.49	18.1286	98.5031	Gehrels et al. (2011)
Temple Butte 2	UA	TempleButte2-72	40.4132	1.14847	2607.12	27.0195	2716.12	41.9165	2716.12	41.9165	95.9866	Gehrels et al. (2011)
Temple Butte 2	UA	TempleButte2-8	13.5273	0.611355	2649.77	143.206	3179.87	21.7255	3179.87	21.7255	83.3295	Gehrels et al. (2011)
Temple Butte 3	UA	TempleButte3-95	196.44	6.40393	509.657	19.6503	445.727	81.4107	509.657	19.6503	114.343	Gehrels et al. (2011)
Temple Butte 3	UA	TempleButte3-99	285.278	0.538591	520.346	17.4465	513.758	73.892	520.346	17.4465	101.282	Gehrels et al. (2011)
Temple Butte 3	UA	TempleButte3-21	72.7937	0.411274	992.732	21.0701	1105.45	95.0452	1105.45	95.0452	89.8035	Gehrels et al. (2011)
Temple Butte 3	UA	TempleButte3-62	43.9276	0.557761	1070.76	16.673	1116.34	97.0328	1116.34	97.0328	95.9166	Gehrels et al. (2011)
Temple Butte 3	UA	TempleButte3-86	84.9755	0.479473	1123	11.5431	1119.64	32.8357	1119.64	32.8357	100.3	Gehrels et al. (2011)
Temple Butte 3	UA	TempleButte3-35	866.942	0.273407	1243.77	59.0471	1245.86	48.6748	1245.86	48.6748	99.8317	Gehrels et al. (2011)
Temple Butte 3	UA	TempleButte3-103	130.092	0.447037	1233.62	6.6244	1252.16	61.7582	1252.16	61.7582	98.5194	Gehrels et al. (2011)
Temple Butte 3	UA	TempleButte3-12	111.167	0.702674	1241.25	32.2917	1266.1	42.6337	1266.1	42.6337	98.0379	Gehrels et al. (2011)
Temple Butte 3	UA	TempleButte3-23	228.46	0.565294	1365.57	20.5517	1357.61	30.1306	1357.61	30.1306	100.587	Gehrels et al. (2011)
Temple Butte 3	UA	TempleButte3-1	106.025	1.3346	1329.13	17.6557	1362.51	46.8882	1362.51	46.8882	97.5501	Gehrels et al. (2011)
Temple Butte 3	UA	TempleButte3-3	132.331	0.363799	1374.7	15.4751	1362.85	34.1348	1362.85	34.1348	100.869	Gehrels et al. (2011)
Temple Butte 3	UA	TempleButte3-97	158.638	0.47961	1368.5	18.865	1363.26	20.4718	1363.26	20.4718	100.384	Gehrels et al. (2011)
Temple Butte 3	UA	TempleButte3-54	69.274	0.468433	1329.73	27.7559	1374.15	74.0032	1374.15	74.0032	96.7671	Gehrels et al. (2011)
Temple Butte 3	UA	TempleButte3-74	266.217	0.305058	1410.42	32.3034	1410.26	30.0511	1410.26	30.0511	100.012	Gehrels et al. (2011)
Temple Butte 3	UA	TempleButte3-84	89.5694	0.528262	1438.27	17.4031	1415.52	47.1126	1415.52	47.1126	101.607	Gehrels et al. (2011)
Temple Butte 3	UA	TempleButte3-65	128.72	0.409026	1417.24	25.191	1418.19	50.1438	1418.19	50.1438	99.9326	Gehrels et al. (2011)
Temple Butte 3	UA	TempleButte3-25	147.37	0.576758	1434.87	16.8518	1422.25	37.9183	1422.25	37.9183	100.887	Gehrels et al. (2011)
Temple Butte 3	UA	TempleButte3-18	207.159	0.278404	1414.12	27.9349	1423.12	42.2343	1423.12	42.2343	99.3671	Gehrels et al. (2011)
Temple Butte 3	UA	TempleButte3-8	112.767	0.716508	1433.21	36.2394	1424.21	25.01	1424.21	25.01	100.632	Gehrels et al. (2011)
Temple Butte 3	UA	TempleButte3-13	61.1376	0.479554	1395.53	45.1738	1431.07	106.979	1431.07	106.979	97.5161	Gehrels et al. (2011)
Temple Butte 3	UA	TempleButte3-6	134.388	0.560007	1409.32	10.8868	1431.78	30.2208	1431.78	30.2208	98.4307	Gehrels et al. (2011)
Temple Butte 3	UA	TempleButte3-9	57.115	1.65205	1405.56	6.31501	1432	100.96	1432	100.96	98.1535	Gehrels et al. (2011)
Temple Butte 3	UA	TempleButte3-32	124.012	0.774188	1450.12	16.4921	1433.8	48.1422	1433.8	48.1422	101.138	Gehrels et al. (2011)
Temple Butte 3	UA	TempleButte3-68	298.214	0.653814	1330.99	37.4004	1435.28	48.5309	1435.28	48.5309	92.7339	Gehrels et al. (2011)
Temple Butte 3	UA	TempleButte3-71	146.273	0.582025	1394.67	20.3167	1439.32	27.8885	1439.32	27.8885	96.8978	Gehrels et al. (2011)
Temple Butte 3	UA	TempleButte3-52	118.847	0.773089	1171.59	29.3536	1440.28	56.5622	1440.28	56.5622	81.3445	Gehrels et al. (2011)
Temple Butte 3	UA	TempleButte3-57	256.046	1.14344	1408.1	39.4663	1441.44	47.6789	1441.44	47.6789	97.6876	Gehrels et al. (2011)
Temple Butte 3	UA	TempleButte3-69	179.962	0.475365	1433.99	33.5569	1442.56	45.3632	1442.56	45.3632	99.4056	Gehrels et al. (2011)
Temple Butte 3	UA	TempleButte3-64	108.882	0.75693	1410.25	60.0411	1442.71	60.5401	1442.71	60.5401	97.7502	Gehrels et al. (2011)
Temple Butte 3	UA	TempleButte3-22	835.128	0.230873	1422.11	24.1199	1444.28	49.203	1444.28	49.203	98.465	Gehrels et al. (2011)
Temple Butte 3	UA	TempleButte3-56	384.447	0.371107	1456.48	24.9002	1448.32	45.5262	1448.32	45.5262	100.563	Gehrels et al. (2011)
Temple Butte 3	UA	TempleButte3-94	248.138	1.48345	1391.12	7.6327	1450.35	41.1633	1450.35	41.1633	95.9163	Gehrels et al. (2011)
Temple Butte 3	UA	TempleButte3-101	180.739	0.500738	1458.98	14.3623	1450.59	71.9907	1450.59	71.9907	100.578	Gehrels et al. (2011)
Temple Butte 3	UA	TempleButte3-7	249.807	0.27895	1435.9	9.268	1451.11	20.4007	1451.11	20.4007	98.9517	Gehrels et al. (2011)
Temple Butte 3	UA	TempleButte3-105	271.519	0.64408	1409.61	29.6279	1456.06	42.8147	1456.06	42.8147	96.8101	Gehrels et al. (2011)
Temple Butte 3	UA	TempleButte3-76	172.945	0.409092	1305.56	36.9921	1457.94	56.8343	1457.94	56.8343	89.5478	Gehrels et al. (2011)
Temple Butte 3	UA	TempleButte3-40	203	0.315809	1439.58	7.22499	1462.8	40.5264	1462.8	40.5264	98.4131	Gehrels et al. (2011)
Temple Butte 3	UA	TempleButte3-43	124.309	0.553647	1470.4	19.8529	1465.51	24.2356	1465.51	24.2356	100.333	Gehrels et al. (2011)
Temple Butte 3	UA	TempleButte3-36	252.207	0.384631	1323.96	45.3613	1467.2	37.0971	1467.2	37.0971	90.2369	Gehrels et al. (2011)
Temple Butte 3	UA	TempleButte3-73	257.555	0.708931	1394.28	10.7828	1470.98	30.3893	1470.98	30.3893	94.7858	Gehrels et al. (2011)
Temple Butte 3	UA	TempleButte3-41	190.292	0.598025	1420.78	34.0457	1479.75	26.1825	1479.75	26.1825	96.0148	Gehrels et al. (2011)
Temple Butte 3	UA	TempleButte3-66	188.075	1.14117	1454.24	24.736	1519.27	55.6141	1519.27	55.6141	95.7196	Gehrels et al. (2011)
Temple Butte 3	UA	TempleButte3-44	65.1372	0.726406	1556.19	16.453	1557.18	47.7675	1557.18	47.7675	99.9359	Gehrels et al. (2011)
Temple Butte 3	UA	TempleButte3-31	262.354	0.554434	1645.16	11.4709	1630.85	34.0249	1630.85	34.0249	100.877	Gehrels et al. (2011)
Temple Butte 3	UA	TempleButte3-88	89.6608	0.526572	1656.51	13.7315	1656.65	34.7411	1656.65	34.7411	99.9912	Gehrels et al. (2011)
Temple Butte 3	UA	TempleButte3-17	134.845	0.558108	1498.37	26.606	1675.08	24.8133	1675.08	24.8133	89.4507	Gehrels et al. (2011)
Temple Butte 3	UA	TempleButte3-59	56.3608	0.280858	1623.04	34.5802	1679.94	83.4624	1679.94	83.4624	96.6131	Gehrels et al. (2011)
Temple Butte 3	UA	TempleButte3-33	119.624	0.329377	1603.14	19.871	1684.47	28.1219	1684.47	28.1219	95.1721	Gehrels et al. (2011)
Temple Butte 3	UA	TempleButte3-104	121.178	0.47566	1634.72	28.4453	1687.36	58.8765	1687.36	58.8765	96.8801	Gehrels et al. (2011)
Temple Butte 3	UA	TempleButte3-83	110.322	0.561146	1701.22	20.0364	1689.43	31.8154	1689.43	31.8154	100.698	Gehrels et al. (2011)
Temple Butte 3	UA	TempleButte3-15	302.099	0.212325	1608.47	49.5387	1690.26	38.7526	1690.26	38.7526	95.161	Gehrels et al. (2011)
Temple Butte 3	UA	TempleButte3-49	210.725	0.443691	1566.79	27.5403	1692.16	46.4817	1692.16	46.4817	92.5909	Gehrels et al. (2011)
Temple Butte 3	UA	TempleButte3-45	134.365	0.58853	1493.5	69.9912	1692.36	53.4893	1692.36	53.4893	88.2495	Gehrels et al. (2011)
Temple Butte 3	UA	TempleButte3-79	260.937	0.572611	1648.4	44.0725	1692.62	44.8137	1692.62	44.8137	97.3874	Gehrels et al. (2011)
Temple Butte 3	UA	TempleButte3-38	190.246	0.226642	1667.96	18.9584	1695.53	28.2077	1695.53	28.2077	98.3739	Gehrels et al. (2011)
Temple Butte 3	UA	TempleButte3-102	200.531	0.575212	1629.66	37.1519	1696.95	42.4056	1696.95	42.4056	96.0345	Gehrels et al. (2011)
Temple Butte 3	UA	TempleButte3-100	135.485	0.432288	1693.4	23.6791	1698.26	23.0552	1698.26	23.0552	99.7136	Gehrels et al. (2011)
Temple Butte 3	UA	TempleButte3-5	121.841	0.364337	1660.77	24.4504	1701.51	29.8479	1701.51	29.8479	97.6056	Gehrels et al. (2011)
Temple Butte 3	UA	TempleButte3-19	145.702	0.412369	1687.31	31.7699	1703.44	39.4646	1703.44	39.4646	99.0532	Gehrels et al. (2011)
Temple Butte 3	UA	TempleButte3-2	297.277	0.514421	1644.68	33.5332	1703.92	29.1059	1703.92	29.1059	96.5234	Gehrels et al. (2011)
Temple Butte 3	UA	TempleButte3-61	411.781	0.448592	1677.33	35.2978	1704.49	37.3048	1704.49	37.3048	98.4067	Gehrels et al. (2011)
Temple Butte 3	UA	TempleButte3-80	150.296	0.272005	1721.22	11.7826	1705.96	46.2194	1705.96	46.2194	100.895	Gehrels et al. (2011)
Temple Butte 3	UA	TempleButte3-26	122.298	0.268995	1680.92	23.8223	1707.55	28.9712	1707.55	28.9712	98.4404	Gehrels et al. (2011)
Temple Butte 3	UA	TempleButte3-53	551.426	0.720152	1510.89	44.9869	1712.48	38.1293	1712.48	38.1293	88.2283	Gehrels et al. (2011)
Temple Butte 3	UA	TempleButte3-4	41.2536	0.350343	1717.06	20.5009	1712.87	81.1165	1712.87	81.1165	100.244	Gehrels et al. (2011)
Temple Butte 3	UA	TempleButte3-60	146.273	0.295012	1653.41	34.5644	1714.49	46.1328	1714.49	46.1328	96.4375	Gehrels et al. (2011)
Temple Butte 3	UA	TempleButte3-96	119.487	0.593271	1591.35	47.8047	1718.44	40.3721	1718.44	40.3721	92.6041	Gehrels et al. (2011)
Temple Butte 3	UA	TempleButte3-34	219.867	0.507411	1707.57	34.0533	1719.07	42.7173	1719.07	42.7173	99.3315	Gehrels et al. (2011)
Temple Butte 3	UA	TempleButte3-50	161.883	0.273154	1637.59	38.3231	1720.2	50.5436	1720.2	50.5436	95.1979	Gehrels et al. (2011)
Temple Butte 3	UA	TempleButte3-10	295.449	0.413362	1547.13	21.1825	1724.03	29.9594	1724.03	29.9594	89.7395	Gehrels et al. (2011)
Temple Butte 3	UA	TempleButte3-82	223.843	0.404005	1681.65	15.6901	1730.74	51.2269	1730.74	51.2269	97.1634	Gehrels et al. (2011)
Temple Butte 3	UA	TempleButte3-58	371.305	0.440405	1727.32	39.8518	1732.32	24.4041	1732.32	24.4041	99.7117	Gehrels et al. (2011)
Temple Butte 3	UA	TempleButte3-72	136.948	0.427168	1655.08	25.2527	1733.03	26.4262	1733.03	26.4262	95.5016	Gehrels et al. (2011)
Temple Butte 3	UA	TempleButte3-11	410.89	0.299822	1687.03	44.3825	1736.6	46.3999	1736.6	46.3999	97.1453	Gehrels et al. (2011)
Temple Butte 3	UA	TempleButte3-81	277.416	0.618358	1612.29	19.9708	1738.24	37.5408	1738.24	37.5408	92.7544	Gehrels et al. (2011)
Temple Butte 3	UA	TempleButte3-85	341.113	0.422589	1679.72	23.068	1741.98	32.0757	1741.98	32.0757	96.426	Gehrels et al. (2011)
Temple Butte 3	UA	TempleButte3-93	154.707	0.334315	1464.19	31.0428	1742.04	35.4353	1742.04	35.4353	84.0502	Gehrels et al. (2011)
Temple Butte 3	UA	TempleButte3-29	264.32	0.145031	1690.44	9.96318	1744.55	44.3014	1744.55	44.3014	96.8982	Gehrels et al. (2011)
Temple Butte 3	UA	TempleButte3-55	345.479	0.446135	1499.42	50.9716	1747.2	26.8433	1747.2	26.8433	85.8187	Gehrels et al. (2011)
Temple Butte 3	UA	TempleButte3-98	299.768	0.346449	1740.49	16.4736	1751.85	26.001	1751.85	26.001	99.3516	Gehrels et al. (2011)
Temple Butte 3	UA	TempleButte3-48	347.627	0.272817	1735.34	26.168	1757.22	34.03	1757.22	34.03	98.7545	Gehrels et al. (2011)
Temple Butte 3	UA	TempleButte3-92	314.647	0.46054	1746.02	24.7787	1757.39	45.1836	1757.39	45.1836	99.353	Gehrels et al. (2011)
Temple Butte 3	UA	TempleButte3-77	237.671	0.434362	1761.15	55.1719	1757.63	29.6839	1757.63	29.6839	100.2	Gehrels et al. (2011)
Temple Butte 3	UA	TempleButte3-90	339.628	0.135873	1680.19	21.5946	1758.65	28.6421	1758.65	28.6421	95.5386	Gehrels et al. (2011)
Temple Butte 3	UA	TempleButte3-39	187.869	0.365604	1759.33	13.0874	1760.8	13.317	1760.8	13.317	99.9168	Gehrels et al. (2011)
Temple Butte 3	UA	TempleButte3-87	336.017	0.238617	1483.05	84.5282	1764.95	26.5507	1764.95	26.5507	84.0277	Gehrels et al. (2011)
Temple Butte 3	UA	TempleButte3-42	120.058	0.366594	1708.98	74.4634	1767.12	18.3263	1767.12	18.3263	96.7101	Gehrels et al. (2011)
Temple Butte 3	UA	TempleButte3-91	119.464	0.418826	1585.25	42.5836	1768.07	51.3382	1768.07	51.3382	89.6599	Gehrels et al. (2011)
Temple Butte 3	UA	TempleButte3-47	137.36	0.290356	1621.47	25.232	1782.96	32.865	1782.96	32.865	90.9425	Gehrels et al. (2011)
Temple Butte 3	UA	TempleButte3-20	134.754	0.595515	1686.76	29.8313	1784.92	46.0858	1784.92	46.0858	94.5003	Gehrels et al. (2011)
Temple Butte 3	UA	TempleButte3-75	323.492	0.116588	1588.82	15.7717	1799.68	22.8671	1799.68	22.8671	88.2837	Gehrels et al. (2011)
Temple Butte 3	UA	TempleButte3-16	200.897	0.352516	1606.84	17.7787	1803.19	35.1082	1803.19	35.1082	89.1107	Gehrels et al. (2011)
Temple Butte 3	UA	TempleButte3-14	398.571	0.556274	1697.52	41.0425	1820.97	43.7421	1820.97	43.7421	93.2207	Gehrels et al. (2011)
Temple Butte 3	UA	TempleButte3-37	125.086	0.276204	1777.75	18.6443	1822.3	41.5844	1822.3	41.5844	97.5552	Gehrels et al. (2011)
Temple Butte 3	UA	TempleButte3-46	58.6463	0.499925	1851.49	22.6917	1844.39	33.179	1844.39	33.179	100.385	Gehrels et al. (2011)
Temple Butte 3	UA	TempleButte3-70	240.688	0.24434	1636.56	13.0081	1868.39	41.5157	1868.39	41.5157	87.5917	Gehrels et al. (2011)
Temple Butte 3	UA	TempleButte3-27	277.187	0.411544	1645.55	60.1287	1880.96	104.659	1880.96	104.659	87.485	Gehrels et al. (2011)
Temple Butte 3	UA	TempleButte3-28	127.486	0.461302	1876.06	32.7178	1897.61	13.3359	1897.61	13.3359	98.8645	Gehrels et al. (2011)
Temple Butte 3	UA	TempleButte3-24	154.867	0.511732	1800.37	30.7893	1906.78	15.3342	1906.78	15.3342	94.4194	Gehrels et al. (2011)
Temple Butte 3	UA	TempleButte3-63	267.383	0.303986	2698.08	61.952	2712.28	27.7085	2712.28	27.7085	99.4765	Gehrels et al. (2011)
Surprise Canyon Cgl	UA	Surprise Canyon Cgl-153	385.017	0.395222	380.617	9.90887	330.25	107.781	380.617	9.90887	115.251	Gehrels et al. (2011)
Surprise Canyon Cgl	UA	Surprise Canyon Cgl-200R33	77.9126	0.657891	393.34	25.2041	415.982	445.902	393.34	25.2041	94.5569	Gehrels et al. (2011)
Surprise Canyon Cgl	UA	Surprise Canyon Cgl-79	85.9728	1.25841	410.148	10.4969	390.215	103.624	410.148	10.4969	105.108	Gehrels et al. (2011)
Surprise Canyon Cgl	UA	Surprise Canyon Cgl-31	232.098	0.21414	410.863	11.3781	406.977	160.115	410.863	11.3781	100.955	Gehrels et al. (2011)
Surprise Canyon Cgl	UA	Surprise Canyon Cgl-69	144.184	0.603871	411.66	33.1236	401.87	55.9006	411.66	33.1236	102.436	Gehrels et al. (2011)
Surprise Canyon Cgl	UA	Surprise Canyon Cgl-67	476.602	0.47577	412.307	9.39053	421.238	75.7499	412.307	9.39053	97.8798	Gehrels et al. (2011)
Surprise Canyon Cgl	UA	Surprise Canyon Cgl-83	388.844	0.476058	412.878	7.23243	442.462	57.2534	412.878	7.23243	93.3139	Gehrels et al. (2011)
Surprise Canyon Cgl	UA	Surprise Canyon Cgl-55	225.917	0.439116	418.951	12.4627	502.085	121.93	418.951	12.4627	83.4423	Gehrels et al. (2011)
Surprise Canyon Cgl	UA	Surprise Canyon Cgl-200R33	158.666	0.823935	419.046	9.31749	561.573	208.691	419.046	9.31749	74.62	Gehrels et al. (2011)
Surprise Canyon Cgl	UA	Surprise Canyon Cgl-52	357.953	0.492764	425.36	12.4572	423.895	63.4747	425.36	12.4572	100.346	Gehrels et al. (2011)
Surprise Canyon Cgl	UA	Surprise Canyon Cgl-122	402.498	0.516639	426.668	6.11531	443.827	97.6665	426.668	6.11531	96.134	Gehrels et al. (2011)
Surprise Canyon Cgl	UA	Surprise Canyon Cgl-1	201.319	0.578312	434.44	23.19	397.816	168.39	434.44	23.19	109.206	Gehrels et al. (2011)
Surprise Canyon Cgl	UA	Surprise Canyon Cgl-115	57.9857	0.746822	436.491	23.1536	443.672	127.126	436.491	23.1536	98.3816	Gehrels et al. (2011)
Surprise Canyon Cgl	UA	Surprise Canyon Cgl-62	346.511	1.30608	439.697	12.7906	488.793	90.5604	439.697	12.7906	89.9556	Gehrels et al. (2011)
Surprise Canyon Cgl	UA	Surprise Canyon Cgl-157	351.608	0.677576	447.677	9.43051	446.262	48.9382	447.677	9.43051	100.317	Gehrels et al. (2011)
Surprise Canyon Cgl	UA	Surprise Canyon Cgl-176	135.857	0.839666	464.063	17.5481	508.706	95.1876	464.063	17.5481	91.2242	Gehrels et al. (2011)
Surprise Canyon Cgl	UA	Surprise Canyon Cgl-117	460.498	0.10552	470.249	29.5072	432.305	81.5691	470.249	29.5072	108.777	Gehrels et al. (2011)
Surprise Canyon Cgl	UA	Surprise Canyon Cgl-97	206.205	0.296429	476.335	16.2498	469.527	101.778	476.335	16.2498	101.45	Gehrels et al. (2011)
Surprise Canyon Cgl	UA	Surprise Canyon Cgl-114	146.532	0.594186	479.42	12.4049	364.801	118.732	479.42	12.4049	131.42	Gehrels et al. (2011)
Surprise Canyon Cgl	UA	Surprise Canyon Cgl-178	119.052	0.455257	479.528	25.8671	301.37	230.414	479.528	25.8671	159.116	Gehrels et al. (2011)
Surprise Canyon Cgl	UA	Surprise Canyon Cgl-187	119.481	0.536242	484.767	27.9993	529.523	272.789	484.767	27.9993	91.5479	Gehrels et al. (2011)
Surprise Canyon Cgl	UA	Surprise Canyon Cgl-131	230.416	1.09264	538.343	28.2103	559.631	121.076	538.343	28.2103	96.1961	Gehrels et al. (2011)
Surprise Canyon Cgl	UA	Surprise Canyon Cgl-71	135.63	0.52606	547.946	20.3159	583.087	80.4179	547.946	20.3159	93.9732	Gehrels et al. (2011)
Surprise Canyon Cgl	UA	Surprise Canyon Cgl-175	43.477	0.276867	569.627	15.974	569.143	70.2066	569.627	15.974	100.085	Gehrels et al. (2011)
Surprise Canyon Cgl	UA	Surprise Canyon Cgl-156	715.571	0.0696214	624.283	22.2548	669.78	27.2236	624.283	22.2548	93.2071	Gehrels et al. (2011)
Surprise Canyon Cgl	UA	Surprise Canyon Cgl-110	114.54	0.661739	725.689	17.2048	748.704	28.3643	725.689	17.2048	96.9261	Gehrels et al. (2011)
Surprise Canyon Cgl	UA	Surprise Canyon Cgl-162	156.109	0.113154	739.766	15.2882	800.483	53.9831	739.766	15.2882	92.415	Gehrels et al. (2011)
Surprise Canyon Cgl	UA	Surprise Canyon Cgl-177	52.4885	0.952224	868.195	30.2264	829.536	28.7539	868.195	30.2264	104.66	Gehrels et al. (2011)
Surprise Canyon Cgl	UA	Surprise Canyon Cgl-125	174.151	0.376419	957.643	13.4912	946.007	59.6887	946.007	59.6887	101.23	Gehrels et al. (2011)
Surprise Canyon Cgl	UA	Surprise Canyon Cgl-137	514.105	0.386813	929.283	16.1114	946.541	16.5675	946.541	16.5675	98.1767	Gehrels et al. (2011)
Surprise Canyon Cgl	UA	Surprise Canyon Cgl-111	101.447	0.601015	934.531	11.9541	959.055	80.8996	959.055	80.8996	97.4429	Gehrels et al. (2011)
Surprise Canyon Cgl	UA	Surprise Canyon Cgl-147	153.454	0.307618	966.914	22.1625	961.665	64.5879	961.665	64.5879	100.546	Gehrels et al. (2011)
Surprise Canyon Cgl	UA	Surprise Canyon Cgl-123	284.784	0.211599	957.603	13.8785	962.569	38.5786	962.569	38.5786	99.4841	Gehrels et al. (2011)
Surprise Canyon Cgl	UA	Surprise Canyon Cgl-191	87.1958	0.949797	967.656	23.5578	965.008	93.3974	965.008	93.3974	100.274	Gehrels et al. (2011)
Surprise Canyon Cgl	UA	Surprise Canyon Cgl-121	208.909	0.277611	941.307	14.3656	965.4	68.0697	965.4	68.0697	97.5044	Gehrels et al. (2011)
Surprise Canyon Cgl	UA	Surprise Canyon Cgl-129	202.21	0.385935	954.913	18.9308	976.156	44.4793	976.156	44.4793	97.8238	Gehrels et al. (2011)
Surprise Canyon Cgl	UA	Surprise Canyon Cgl-92	120.213	0.313975	955.421	14.681	979.164	52.7233	979.164	52.7233	97.5752	Gehrels et al. (2011)
Surprise Canyon Cgl	UA	Surprise Canyon Cgl-19	182.798	0.543683	951.781	15.1024	984.14	46.7887	984.14	46.7887	96.712	Gehrels et al. (2011)
Surprise Canyon Cgl	UA	Surprise Canyon Cgl-57	38.255	0.714074	984.02	26.8984	998.785	32.5236	998.785	32.5236	98.5217	Gehrels et al. (2011)
Surprise Canyon Cgl	UA	Surprise Canyon Cgl-101	105.319	0.343219	979.516	19.4695	1000.88	35.0203	1000.88	35.0203	97.8653	Gehrels et al. (2011)
Surprise Canyon Cgl	UA	Surprise Canyon Cgl-58	63.4454	0.608398	991.206	43.4295	1005.98	44.7042	1005.98	44.7042	98.5314	Gehrels et al. (2011)
Surprise Canyon Cgl	UA	Surprise Canyon Cgl-37	94.798	0.552486	988.056	34.4201	1008.33	35.0022	1008.33	35.0022	97.9895	Gehrels et al. (2011)
Surprise Canyon Cgl	UA	Surprise Canyon Cgl-15	100.608	0.261206	992.2	24.2252	1011.23	62.3668	1011.23	62.3668	98.1186	Gehrels et al. (2011)
Surprise Canyon Cgl	UA	Surprise Canyon Cgl-59	19.8151	0.590029	938.63	73.6535	1012.42	54.678	1012.42	54.678	92.712	Gehrels et al. (2011)
Surprise Canyon Cgl	UA	Surprise Canyon Cgl-120	263.274	1.19045	1004.13	24.9242	1012.48	28.4674	1012.48	28.4674	99.1753	Gehrels et al. (2011)
Surprise Canyon Cgl	UA	Surprise Canyon Cgl-140	6.36792	0.783833	980.044	14.8237	1016.66	98.1726	1016.66	98.1726	96.3982	Gehrels et al. (2011)
Surprise Canyon Cgl	UA	Surprise Canyon Cgl-185	145.077	1.51676	1007.93	74.1392	1019.45	58.7883	1019.45	58.7883	98.8696	Gehrels et al. (2011)
Surprise Canyon Cgl	UA	Surprise Canyon Cgl-86	378.041	0.32743	1012.72	9.89555	1020.6	34.2832	1020.6	34.2832	99.228	Gehrels et al. (2011)
Surprise Canyon Cgl	UA	Surprise Canyon Cgl-132	252.865	0.353573	1002.97	17.2186	1022.04	48.3949	1022.04	48.3949	98.1349	Gehrels et al. (2011)
Surprise Canyon Cgl	UA	Surprise Canyon Cgl-29	205.864	0.248265	1000.35	44.8573	1024.41	62.6536	1024.41	62.6536	97.6515	Gehrels et al. (2011)
Surprise Canyon Cgl	UA	Surprise Canyon Cgl-85	902.873	0.217513	1042.73	15.102	1028.21	7.0618	1028.21	7.0618	101.412	Gehrels et al. (2011)
Surprise Canyon Cgl	UA	Surprise Canyon Cgl-95	187.531	0.306183	1025.18	23.3275	1029.33	66.5475	1029.33	66.5475	99.5966	Gehrels et al. (2011)
Surprise Canyon Cgl	UA	Surprise Canyon Cgl-26	233.94	0.25498	1015.93	17.8771	1035.54	30.1189	1035.54	30.1189	98.1058	Gehrels et al. (2011)
Surprise Canyon Cgl	UA	Surprise Canyon Cgl-80	80.133	0.606082	979.544	33.9562	1036.1	48.2193	1036.1	48.2193	94.5414	Gehrels et al. (2011)
Surprise Canyon Cgl	UA	Surprise Canyon Cgl-75	236.668	0.181482	1046.83	11.8223	1036.48	47.3486	1036.48	47.3486	100.999	Gehrels et al. (2011)
Surprise Canyon Cgl	UA	Surprise Canyon Cgl-91	97.8486	0.726	1009.44	20.2131	1040.59	59.7448	1040.59	59.7448	97.0067	Gehrels et al. (2011)
Surprise Canyon Cgl	UA	Surprise Canyon Cgl-148	58.0986	0.366595	1003.43	46.4251	1041.82	33.2586	1041.82	33.2586	96.3151	Gehrels et al. (2011)
Surprise Canyon Cgl	UA	Surprise Canyon Cgl-90	194.706	0.474098	1004.03	19.058	1041.99	43.8443	1041.99	43.8443	96.3561	Gehrels et al. (2011)
Surprise Canyon Cgl	UA	Surprise Canyon Cgl-49	131.911	0.446869	1034.63	18.1796	1043.21	54.1989	1043.21	54.1989	99.1773	Gehrels et al. (2011)
Surprise Canyon Cgl	UA	Surprise Canyon Cgl-36	413.787	0.19665	1073.25	35.1753	1046.54	25.5778	1046.54	25.5778	102.552	Gehrels et al. (2011)
Surprise Canyon Cgl	UA	Surprise Canyon Cgl-113	128.92	0.980661	1042.3	15.6722	1049.61	51.4752	1049.61	51.4752	99.3034	Gehrels et al. (2011)
Surprise Canyon Cgl	UA	Surprise Canyon Cgl-74	205.867	0.250422	1025.21	18.5848	1053.88	34.1444	1053.88	34.1444	97.2795	Gehrels et al. (2011)
Surprise Canyon Cgl	UA	Surprise Canyon Cgl-194	61.8778	0.471115	1069.45	53.416	1055.59	44.5754	1055.59	44.5754	101.314	Gehrels et al. (2011)
Surprise Canyon Cgl	UA	Surprise Canyon Cgl-173	107.192	1.0258	1068.24	39.7899	1056.46	54.7828	1056.46	54.7828	101.115	Gehrels et al. (2011)
Surprise Canyon Cgl	UA	Surprise Canyon Cgl-3	173.637	0.494575	964.889	18.4324	1060.5	50.2466	1060.5	50.2466	90.9844	Gehrels et al. (2011)
Surprise Canyon Cgl	UA	Surprise Canyon Cgl-128	207.839	1.32863	1058.34	20.6831	1065.91	14.8944	1065.91	14.8944	99.2903	Gehrels et al. (2011)
Surprise Canyon Cgl	UA	Surprise Canyon Cgl-53	113.627	0.303554	1005.85	18.8369	1066.04	37.6675	1066.04	37.6675	94.354	Gehrels et al. (2011)
Surprise Canyon Cgl	UA	Surprise Canyon Cgl-166	96.7803	0.451255	1087.37	39.9609	1067.7	51.9971	1067.7	51.9971	101.842	Gehrels et al. (2011)
Surprise Canyon Cgl	UA	Surprise Canyon Cgl-107	231.732	0.436678	1069.79	29.5218	1068.83	28.2639	1068.83	28.2639	100.089	Gehrels et al. (2011)
Surprise Canyon Cgl	UA	Surprise Canyon Cgl-144	32.8175	0.234419	1071.06	28.0226	1070.34	39.1194	1070.34	39.1194	100.067	Gehrels et al. (2011)
Surprise Canyon Cgl	UA	Surprise Canyon Cgl-82	567.37	0.104633	1021.72	14.4443	1070.81	24.8365	1070.81	24.8365	95.415	Gehrels et al. (2011)
Surprise Canyon Cgl	UA	Surprise Canyon Cgl-46	30.2494	0.350741	992.512	42.2519	1072.22	24.3469	1072.22	24.3469	92.5659	Gehrels et al. (2011)
Surprise Canyon Cgl	UA	Surprise Canyon Cgl-18	828.068	0.214572	901.504	43.1392	1074.05	53.4547	1074.05	53.4547	83.9352	Gehrels et al. (2011)
Surprise Canyon Cgl	UA	Surprise Canyon Cgl-99	77.044	0.443195	1083.08	31.7152	1075.29	72.9554	1075.29	72.9554	100.724	Gehrels et al. (2011)
Surprise Canyon Cgl	UA	Surprise Canyon Cgl-146	164.269	0.379572	1074.06	29.0144	1075.67	48.5215	1075.67	48.5215	99.8501	Gehrels et al. (2011)
Surprise Canyon Cgl	UA	Surprise Canyon Cgl-96	61.5987	0.43131	1011.77	39.3763	1077.94	45.634	1077.94	45.634	93.8615	Gehrels et al. (2011)
Surprise Canyon Cgl	UA	Surprise Canyon Cgl-28	206.153	0.261016	1072.43	14.831	1078.98	38.9418	1078.98	38.9418	99.3932	Gehrels et al. (2011)
Surprise Canyon Cgl	UA	Surprise Canyon Cgl-44	335.113	0.24674	1064.82	25.0044	1079.7	35.7424	1079.7	35.7424	98.6223	Gehrels et al. (2011)
Surprise Canyon Cgl	UA	Surprise Canyon Cgl-106	840.785	0.242432	1079.79	32.3017	1081.4	20.5586	1081.4	20.5586	99.8509	Gehrels et al. (2011)
Surprise Canyon Cgl	UA	Surprise Canyon Cgl-14	109.686	0.403225	1061.42	19.4633	1081.66	69.6625	1081.66	69.6625	98.1292	Gehrels et al. (2011)
Surprise Canyon Cgl	UA	Surprise Canyon Cgl-76	180.393	0.319313	1094.26	16.165	1082.13	26.8825	1082.13	26.8825	101.121	Gehrels et al. (2011)
Surprise Canyon Cgl	UA	Surprise Canyon Cgl-24	85.51	0.161802	1091.74	44.9375	1083.48	77.851	1083.48	77.851	100.762	Gehrels et al. (2011)
Surprise Canyon Cgl	UA	Surprise Canyon Cgl-188	53.3072	0.37465	993.463	29.9454	1088.6	166.691	1088.6	166.691	91.2605	Gehrels et al. (2011)
Surprise Canyon Cgl	UA	Surprise Canyon Cgl-124	75.4457	0.527152	1079.52	36.7477	1090.28	54.1986	1090.28	54.1986	99.0127	Gehrels et al. (2011)
Surprise Canyon Cgl	UA	Surprise Canyon Cgl-149	440.363	0.461966	1079.82	39.1585	1098.63	12.62	1098.63	12.62	98.2883	Gehrels et al. (2011)
Surprise Canyon Cgl	UA	Surprise Canyon Cgl-68	86.9141	0.236107	1058.81	21.814	1106.15	31.2946	1106.15	31.2946	95.7205	Gehrels et al. (2011)
Surprise Canyon Cgl	UA	Surprise Canyon Cgl-35	194.348	0.231272	1013.44	33.4788	1106.54	48.6233	1106.54	48.6233	91.5863	Gehrels et al. (2011)
Surprise Canyon Cgl	UA	Surprise Canyon Cgl-103	880.859	0.0883269	938.068	26.5316	1116.17	16.9482	1116.17	16.9482	84.0433	Gehrels et al. (2011)
Surprise Canyon Cgl	UA	Surprise Canyon Cgl-141	120.606	0.889521	1042.96	30.1196	1116.87	55.2034	1116.87	55.2034	93.3826	Gehrels et al. (2011)
Surprise Canyon Cgl	UA	Surprise Canyon Cgl-34	137.26	0.209683	1117.61	11.2296	1117.67	46.5497	1117.67	46.5497	99.9952	Gehrels et al. (2011)
Surprise Canyon Cgl	UA	Surprise Canyon Cgl-151	167.875	0.52123	1023.77	14.2938	1117.95	49.9499	1117.95	49.9499	91.5761	Gehrels et al. (2011)
Surprise Canyon Cgl	UA	Surprise Canyon Cgl-63	105.593	0.434498	1042.48	38.244	1129.2	47.1533	1129.2	47.1533	92.3203	Gehrels et al. (2011)
Surprise Canyon Cgl	UA	Surprise Canyon Cgl-161	28.4046	0.93066	1067.52	49.8046	1130.42	59.8004	1130.42	59.8004	94.4358	Gehrels et al. (2011)
Surprise Canyon Cgl	UA	Surprise Canyon Cgl-150	173.377	0.516058	1100.75	60.1319	1144.3	55.9952	1144.3	55.9952	96.1942	Gehrels et al. (2011)
Surprise Canyon Cgl	UA	Surprise Canyon Cgl-38	104.02	0.393116	1122.16	14.7776	1148.32	82.3809	1148.32	82.3809	97.7221	Gehrels et al. (2011)
Surprise Canyon Cgl	UA	Surprise Canyon Cgl-66	210.129	0.312447	1129.16	25.545	1151.78	30.4901	1151.78	30.4901	98.0364	Gehrels et al. (2011)
Surprise Canyon Cgl	UA	Surprise Canyon Cgl-136	241.711	0.544627	1143.59	33.669	1156.46	43.3277	1156.46	43.3277	98.8867	Gehrels et al. (2011)
Surprise Canyon Cgl	UA	Surprise Canyon Cgl-183	84.2914	0.240181	1108.71	36.7525	1158.3	49.3699	1158.3	49.3699	95.7184	Gehrels et al. (2011)
Surprise Canyon Cgl	UA	Surprise Canyon Cgl-72	135.603	0.601863	1124.22	16.7737	1168.98	57.5987	1168.98	57.5987	96.1707	Gehrels et al. (2011)
Surprise Canyon Cgl	UA	Surprise Canyon Cgl-133	390.121	1.17122	1183.97	18.7641	1177.24	28.835	1177.24	28.835	100.572	Gehrels et al. (2011)
Surprise Canyon Cgl	UA	Surprise Canyon Cgl-16	175.699	0.363602	1152.23	25.8289	1178.89	41.0627	1178.89	41.0627	97.7389	Gehrels et al. (2011)
Surprise Canyon Cgl	UA	Surprise Canyon Cgl-1578	23.5399	0.422332	1192.78	95.0422	1182.42	36.3948	1182.42	36.3948	100.876	Gehrels et al. (2011)
Surprise Canyon Cgl	UA	Surprise Canyon Cgl-50	83.6507	0.68772	1163.82	41.9092	1190.27	43.0507	1190.27	43.0507	97.7783	Gehrels et al. (2011)
Surprise Canyon Cgl	UA	Surprise Canyon Cgl-42	440.21	0.204535	1154.85	18.4722	1190.68	24.7209	1190.68	24.7209	96.9908	Gehrels et al. (2011)
Surprise Canyon Cgl	UA	Surprise Canyon Cgl-104	763.9	0.10278	1198.01	40.9609	1190.73	10.4957	1190.73	10.4957	100.611	Gehrels et al. (2011)
Surprise Canyon Cgl	UA	Surprise Canyon Cgl-109	435.129	0.452973	1163.94	26.5209	1194.91	21.1834	1194.91	21.1834	97.408	Gehrels et al. (2011)
Surprise Canyon Cgl	UA	Surprise Canyon Cgl-39	152.448	0.414232	1198.56	62.8855	1202.8	59.3926	1202.8	59.3926	99.6475	Gehrels et al. (2011)
Surprise Canyon Cgl	UA	Surprise Canyon Cgl-2	294.204	0.325943	1210.59	24.358	1206.82	21.1902	1206.82	21.1902	100.313	Gehrels et al. (2011)
Surprise Canyon Cgl	UA	Surprise Canyon Cgl-127	192.216	0.236229	1160.06	19.6618	1206.97	28.6641	1206.97	28.6641	96.1138	Gehrels et al. (2011)
Surprise Canyon Cgl	UA	Surprise Canyon Cgl-102	190.152	0.274495	1226.37	41.1426	1215.33	40.0726	1215.33	40.0726	100.909	Gehrels et al. (2011)
Surprise Canyon Cgl	UA	Surprise Canyon Cgl-13	107.1	0.385114	1156.55	46.8456	1215.44	71.6896	1215.44	71.6896	95.1554	Gehrels et al. (2011)
Surprise Canyon Cgl	UA	Surprise Canyon Cgl-180	21.1006	0.567296	1185.29	24.4694	1230.06	43.705	1230.06	43.705	96.361	Gehrels et al. (2011)
Surprise Canyon Cgl	UA	Surprise Canyon Cgl-88	113.761	1.14889	1166.3	19.7404	1233.12	68.482	1233.12	68.482	94.5811	Gehrels et al. (2011)
Surprise Canyon Cgl	UA	Surprise Canyon Cgl-100	102.788	0.552675	1236.58	19.7879	1238.26	57.9826	1238.26	57.9826	99.8644	Gehrels et al. (2011)
Surprise Canyon Cgl	UA	Surprise Canyon Cgl-186	141.628	0.279659	1241.86	43.6151	1243.98	39.4559	1243.98	39.4559	99.8296	Gehrels et al. (2011)
Surprise Canyon Cgl	UA	Surprise Canyon Cgl-48	131.201	0.525778	1213.02	15.4705	1245.51	46.1903	1245.51	46.1903	97.3912	Gehrels et al. (2011)
Surprise Canyon Cgl	UA	Surprise Canyon Cgl-87	135.202	0.347782	1238.23	20.1841	1245.54	71.1761	1245.54	71.1761	99.4133	Gehrels et al. (2011)
Surprise Canyon Cgl	UA	Surprise Canyon Cgl-17	291.262	0.230373	1257.59	17.318	1250.87	26.4404	1250.87	26.4404	100.537	Gehrels et al. (2011)
Surprise Canyon Cgl	UA	Surprise Canyon Cgl-143	204.76	0.280801	1281.27	33.4977	1255.87	34.4183	1255.87	34.4183	102.022	Gehrels et al. (2011)
Surprise Canyon Cgl	UA	Surprise Canyon Cgl-70	211.95	0.0896608	1267.04	31.196	1259.94	26.739	1259.94	26.739	100.564	Gehrels et al. (2011)
Surprise Canyon Cgl	UA	Surprise Canyon Cgl-192	145.681	0.326356	1241.82	61.9995	1268.13	29.3551	1268.13	29.3551	97.926	Gehrels et al. (2011)
Surprise Canyon Cgl	UA	Surprise Canyon Cgl-5	93.312	0.712135	1252.3	13.3278	1275.3	73.4038	1275.3	73.4038	98.1963	Gehrels et al. (2011)
Surprise Canyon Cgl	UA	Surprise Canyon Cgl-152	203.588	0.49488	1287.98	31.0752	1307.6	34.089	1307.6	34.089	98.4996	Gehrels et al. (2011)
Surprise Canyon Cgl	UA	Surprise Canyon Cgl-2	163.234	0.413196	1237.08	23.9375	1315.17	45.4651	1315.17	45.4651	94.0624	Gehrels et al. (2011)
Surprise Canyon Cgl	UA	Surprise Canyon Cgl-171	61.2156	0.362347	1351.22	40.465	1324	67.2521	1324	67.2521	102.056	Gehrels et al. (2011)
Surprise Canyon Cgl	UA	Surprise Canyon Cgl-155	231.406	0.494041	1245.34	39.3142	1326.91	31.2519	1326.91	31.2519	93.8522	Gehrels et al. (2011)
Surprise Canyon Cgl	UA	Surprise Canyon Cgl-4	217.937	0.347159	1348.64	15.2099	1358.18	17.4714	1358.18	17.4714	99.2976	Gehrels et al. (2011)
Surprise Canyon Cgl	UA	Surprise Canyon Cgl-39	82.2192	0.446175	1250.58	51.3774	1365.29	87.0353	1365.29	87.0353	91.5977	Gehrels et al. (2011)
Surprise Canyon Cgl	UA	Surprise Canyon Cgl-119	117.523	0.279542	1373.34	20.8804	1380.37	36.2762	1380.37	36.2762	99.4906	Gehrels et al. (2011)
Surprise Canyon Cgl	UA	Surprise Canyon Cgl-164	121.51	0.328195	1368.96	34.153	1394.45	34.0621	1394.45	34.0621	98.1718	Gehrels et al. (2011)
Surprise Canyon Cgl	UA	Surprise Canyon Cgl-6	92.7597	0.23949	1338.35	64.1855	1402.89	69.2375	1402.89	69.2375	95.3991	Gehrels et al. (2011)
Surprise Canyon Cgl	UA	Surprise Canyon Cgl-81	61.3962	0.223343	1351.88	25.1909	1408.08	39.5595	1408.08	39.5595	96.0091	Gehrels et al. (2011)
Surprise Canyon Cgl	UA	Surprise Canyon Cgl-23	64.4387	0.303636	1403.35	25.0182	1410.01	52.7296	1410.01	52.7296	99.5279	Gehrels et al. (2011)
Surprise Canyon Cgl	UA	Surprise Canyon Cgl-21	237.786	0.344464	1407.2	67.0417	1411.18	29.034	1411.18	29.034	99.7177	Gehrels et al. (2011)
Surprise Canyon Cgl	UA	Surprise Canyon Cgl-160	68.1306	0.668949	1291.36	30.9904	1418.07	44.854	1418.07	44.854	91.0647	Gehrels et al. (2011)
Surprise Canyon Cgl	UA	Surprise Canyon Cgl-64	569.959	0.379046	1412.78	30.6015	1418.68	15.1498	1418.68	15.1498	99.5843	Gehrels et al. (2011)
Surprise Canyon Cgl	UA	Surprise Canyon Cgl-189	88.9983	0.463741	1377.41	45.6642	1431.85	64.6516	1431.85	64.6516	96.1973	Gehrels et al. (2011)
Surprise Canyon Cgl	UA	Surprise Canyon Cgl-93	154.956	0.716168	1422.83	39.8792	1433.08	43.0392	1433.08	43.0392	99.2844	Gehrels et al. (2011)
Surprise Canyon Cgl	UA	Surprise Canyon Cgl-47	336.068	0.433317	1436.56	21.1192	1437.7	19.208	1437.7	19.208	99.9208	Gehrels et al. (2011)
Surprise Canyon Cgl	UA	Surprise Canyon Cgl-142	594.249	0.21798	1424.83	32.4869	1442.15	7.25206	1442.15	7.25206	98.7993	Gehrels et al. (2011)
Surprise Canyon Cgl	UA	Surprise Canyon Cgl-159	239.256	0.807774	1451.16	32.8953	1445.82	18.7071	1445.82	18.7071	100.369	Gehrels et al. (2011)
Surprise Canyon Cgl	UA	Surprise Canyon Cgl-182	78.1589	0.405271	1417.46	18.5439	1446.8	49.985	1446.8	49.985	97.9725	Gehrels et al. (2011)
Surprise Canyon Cgl	UA	Surprise Canyon Cgl-167	26.486	0.253407	1436.31	88.307	1450.29	32.8948	1450.29	32.8948	99.0358	Gehrels et al. (2011)
Surprise Canyon Cgl	UA	Surprise Canyon Cgl-154	219.978	0.374153	1390.04	57.389	1454.02	18.7481	1454.02	18.7481	95.5995	Gehrels et al. (2011)
Surprise Canyon Cgl	UA	Surprise Canyon Cgl-139	64.4938	0.460475	1430.81	26.7574	1456.17	60.4192	1456.17	60.4192	98.2589	Gehrels et al. (2011)
Surprise Canyon Cgl	UA	Surprise Canyon Cgl-73	122.849	0.903729	1355.03	43.3434	1457.02	35.7738	1457.02	35.7738	93.0002	Gehrels et al. (2011)
Surprise Canyon Cgl	UA	Surprise Canyon Cgl-170	187.38	0.305552	1425.5	85.5649	1461.16	29.1982	1461.16	29.1982	97.5591	Gehrels et al. (2011)
Surprise Canyon Cgl	UA	Surprise Canyon Cgl-27	113.936	0.597488	1463	31.1887	1474.81	33.1946	1474.81	33.1946	99.1998	Gehrels et al. (2011)
Surprise Canyon Cgl	UA	Surprise Canyon Cgl-112	200.824	0.382708	1510.05	27.397	1515.36	18.7003	1515.36	18.7003	99.6498	Gehrels et al. (2011)
Surprise Canyon Cgl	UA	Surprise Canyon Cgl-138	153.695	0.785332	1523.2	33.2398	1525.81	31.1111	1525.81	31.1111	99.8287	Gehrels et al. (2011)
Surprise Canyon Cgl	UA	Surprise Canyon Cgl-174	76.4209	0.376241	1525.55	36.3954	1529.13	54.0072	1529.13	54.0072	99.7661	Gehrels et al. (2011)
Surprise Canyon Cgl	UA	Surprise Canyon Cgl-22	124.453	0.421284	1524.37	17.8871	1566.47	28.4202	1566.47	28.4202	97.3119	Gehrels et al. (2011)
Surprise Canyon Cgl	UA	Surprise Canyon Cgl-41	489.21	0.25488	1570.64	29.5665	1572.66	10.381	1572.66	10.381	99.8713	Gehrels et al. (2011)
Surprise Canyon Cgl	UA	Surprise Canyon Cgl-89	23.584	0.0108208	1603.87	50.3026	1622.59	43.9357	1622.59	43.9357	98.8464	Gehrels et al. (2011)
Surprise Canyon Cgl	UA	Surprise Canyon Cgl-198	117.134	0.50647	1519.84	59.2623	1626.95	42.7631	1626.95	42.7631	93.4167	Gehrels et al. (2011)
Surprise Canyon Cgl	UA	Surprise Canyon Cgl-196	41.6373	0.389534	1538.12	57.0644	1637.27	83.3258	1637.27	83.3258	93.9437	Gehrels et al. (2011)
Surprise Canyon Cgl	UA	Surprise Canyon Cgl-165	236.593	0.236219	1635.06	113.501	1637.63	15.3192	1637.63	15.3192	99.8432	Gehrels et al. (2011)
Surprise Canyon Cgl	UA	Surprise Canyon Cgl-168	67.12	0.288115	1632.46	39.9452	1646.56	19.0535	1646.56	19.0535	99.1436	Gehrels et al. (2011)
Surprise Canyon Cgl	UA	Surprise Canyon Cgl-193	94.6399	0.827621	1563.86	45.2322	1650.05	27.9753	1650.05	27.9753	94.7763	Gehrels et al. (2011)
Surprise Canyon Cgl	UA	Surprise Canyon Cgl-179	57.7547	0.495276	1575.7	40.9714	1656.76	66.3903	1656.76	66.3903	95.1074	Gehrels et al. (2011)
Surprise Canyon Cgl	UA	Surprise Canyon Cgl-105	153.334	0.663261	1644.06	23.0453	1663.15	18.4684	1663.15	18.4684	98.8522	Gehrels et al. (2011)
Surprise Canyon Cgl	UA	Surprise Canyon Cgl-197	155.589	0.678638	1686.26	70.6353	1664.37	44.0332	1664.37	44.0332	101.315	Gehrels et al. (2011)
Surprise Canyon Cgl	UA	Surprise Canyon Cgl-60	126.097	0.440728	1638.94	19.1804	1668.29	25.8948	1668.29	25.8948	98.2408	Gehrels et al. (2011)
Surprise Canyon Cgl	UA	Surprise Canyon Cgl-195	114.818	0.306941	1623.54	47.9967	1669.59	13.2771	1669.59	13.2771	97.2414	Gehrels et al. (2011)
Surprise Canyon Cgl	UA	Surprise Canyon Cgl-9	415.791	0.599739	1657.05	14.5469	1681.13	9.93001	1681.13	9.93001	98.5677	Gehrels et al. (2011)
Surprise Canyon Cgl	UA	Surprise Canyon Cgl-135	383.706	0.358468	1627.27	83.7585	1685.13	14.3376	1685.13	14.3376	96.5664	Gehrels et al. (2011)
Surprise Canyon Cgl	UA	Surprise Canyon Cgl-199	200.321	0.664285	1611.53	31.1919	1689.91	14.9607	1689.91	14.9607	95.3619	Gehrels et al. (2011)
Surprise Canyon Cgl	UA	Surprise Canyon Cgl-108	184.939	0.884839	1677.25	24.1098	1696.5	32.8599	1696.5	32.8599	98.8651	Gehrels et al. (2011)
Surprise Canyon Cgl	UA	Surprise Canyon Cgl-61	250.16	0.544447	1673.75	34.0597	1708.72	16.8589	1708.72	16.8589	97.9532	Gehrels et al. (2011)
Surprise Canyon Cgl	UA	Surprise Canyon Cgl-77	315.976	0.457452	1719.46	34.2229	1722.69	15.5457	1722.69	15.5457	99.8128	Gehrels et al. (2011)
Surprise Canyon Cgl	UA	Surprise Canyon Cgl-200	36.5466	0.678402	1690.09	81.341	1738.86	23.5372	1738.86	23.5372	97.1953	Gehrels et al. (2011)
Surprise Canyon Cgl	UA	Surprise Canyon Cgl-78	88.6747	0.69873	1732.14	56.285	1743.31	30.9134	1743.31	30.9134	99.3594	Gehrels et al. (2011)
Surprise Canyon Cgl	UA	Surprise Canyon Cgl-7	277.409	0.207028	1735.33	29.1121	1747.31	12.5416	1747.31	12.5416	99.3148	Gehrels et al. (2011)
Surprise Canyon Cgl	UA	Surprise Canyon Cgl-8	477.324	0.351603	1731.91	11.6275	1755	3.80056	1755	3.80056	98.6839	Gehrels et al. (2011)
Surprise Canyon Cgl	UA	Surprise Canyon Cgl-43	246.277	0.421784	1704.77	26.3603	1762.92	9.43233	1762.92	9.43233	96.7016	Gehrels et al. (2011)
Surprise Canyon Cgl	UA	Surprise Canyon Cgl-40	110.316	0.271753	1786.52	43.3099	1791.04	17.856	1791.04	17.856	99.7475	Gehrels et al. (2011)
Surprise Canyon Cgl	UA	Surprise Canyon Cgl-116	121.895	0.64971	1788.29	50.0309	1792.28	31.9801	1792.28	31.9801	99.7778	Gehrels et al. (2011)
Surprise Canyon Cgl	UA	Surprise Canyon Cgl-84	364.052	1.54167	1829.12	20.4127	1823.19	11.4524	1823.19	11.4524	100.325	Gehrels et al. (2011)
Surprise Canyon Cgl	UA	Surprise Canyon Cgl-56	233.633	0.25608	1838.64	22.9798	1847.19	17.672	1847.19	17.672	99.5373	Gehrels et al. (2011)
Surprise Canyon Cgl	UA	Surprise Canyon Cgl-190	110.243	0.345686	1810.79	56.7901	1851.22	14.064	1851.22	14.064	97.816	Gehrels et al. (2011)
Surprise Canyon Cgl	UA	Surprise Canyon Cgl-184	48.4691	0.503705	1852.2	43.6719	1877.16	24.7009	1877.16	24.7009	98.6703	Gehrels et al. (2011)
Surprise Canyon Cgl	UA	Surprise Canyon Cgl-126	267.941	0.400821	1717.08	49.3706	1878	10.3983	1878	10.3983	91.4316	Gehrels et al. (2011)
Surprise Canyon Cgl	UA	Surprise Canyon Cgl-181	27.9778	1.57984	1878.84	73.4333	1881.87	70.4652	1881.87	70.4652	99.8394	Gehrels et al. (2011)
Surprise Canyon Cgl	UA	Surprise Canyon Cgl-172	59.9792	0.323104	1882.72	97.1713	1896.93	45.562	1896.93	45.562	99.2511	Gehrels et al. (2011)
Surprise Canyon Cgl	UA	Surprise Canyon Cgl-30	375.773	0.280555	1813.84	31.4862	1900.39	6.66419	1900.39	6.66419	95.4458	Gehrels et al. (2011)
Surprise Canyon Cgl	UA	Surprise Canyon Cgl-32	312.07	0.320063	1912.34	20.057	1915.21	9.36416	1915.21	9.36416	99.8504	Gehrels et al. (2011)
Surprise Canyon Cgl	UA	Surprise Canyon Cgl-118	120.084	0.472875	2013.78	34.7638	2004.55	21.2657	2004.55	21.2657	100.46	Gehrels et al. (2011)
Surprise Canyon Cgl	UA	Surprise Canyon Cgl-10	846.308	0.196584	2107.17	13.504	2096.04	2.78102	2096.04	2.78102	100.531	Gehrels et al. (2011)
Surprise Canyon Cgl	UA	Surprise Canyon Cgl-134	339.856	0.549845	2186.41	31.0114	2180.15	8.48703	2180.15	8.48703	100.287	Gehrels et al. (2011)
Surprise Canyon Cgl	UA	Surprise Canyon Cgl-51`	144.876	0.710327	2692.61	24.5994	2692.38	12.7948	2692.38	12.7948	100.008	Gehrels et al. (2011)
Surprise Canyon Cgl	UA	Surprise Canyon Cgl-94	121.246	0.580475	2613.81	30.9964	2695.21	10.2448	2695.21	10.2448	96.9799	Gehrels et al. (2011)
Surprise Canyon Cgl	UA	Surprise Canyon Cgl-145	142.838	0.741608	2724.73	44.3558	2704.96	12.1648	2704.96	12.1648	100.731	Gehrels et al. (2011)
Surprise Canyon Cgl	UA	Surprise Canyon Cgl-25	175.615	0.907193	2684.47	45.9652	2712.17	8.03046	2712.17	8.03046	98.9787	Gehrels et al. (2011)
Surprise Canyon Cgl	UA	Surprise Canyon Cgl-11	544.041	0.804601	2767.38	57.7997	2768.03	8.83687	2768.03	8.83687	99.9765	Gehrels et al. (2011)
Surprise Canyon Cgl	UA	Surprise Canyon Cgl-45	198.835	0.843038	2515.54	38.8772	2782.09	37.6981	2782.09	37.6981	90.419	Gehrels et al. (2011)
Surprise Canyon 2	UA	Surprise Canyon 2-96	183.633	0.422655	393.483	10.8877	234.229	123.711	393.483	10.8877	167.991	Gehrels et al. (2011)
Surprise Canyon 2	UA	Surprise Canyon 2-72	290.199	1.23847	422.618	17.4521	472.532	74.618	422.618	17.4521	89.4368	Gehrels et al. (2011)
Surprise Canyon 2	UA	Surprise Canyon 2-65	235.925	1.19424	424.187	11.7707	441.379	213.993	424.187	11.7707	96.105	Gehrels et al. (2011)
Surprise Canyon 2	UA	Surprise Canyon 2-99	200.294	0.282108	432.819	21.0227	367.765	113.886	432.819	21.0227	117.689	Gehrels et al. (2011)
Surprise Canyon 2	UA	Surprise Canyon 2-10	192.341	0.338242	450.187	26.0189	486.241	260.449	450.187	26.0189	92.5852	Gehrels et al. (2011)
Surprise Canyon 2	UA	Surprise Canyon 2-88	371.305	0.977961	460.648	19.4053	417.566	78.5779	460.648	19.4053	110.317	Gehrels et al. (2011)
Surprise Canyon 2	UA	Surprise Canyon 2-75	174.861	1.05403	464.389	12.0079	428.261	120.041	464.389	12.0079	108.436	Gehrels et al. (2011)
Surprise Canyon 2	UA	Surprise Canyon 2-1	189.491	0.847111	478.957	15.5397	545.234	84.531	478.957	15.5397	87.8443	Gehrels et al. (2011)
Surprise Canyon 2	UA	Surprise Canyon 2-57	122.866	0.353313	707.45	61.3779	767.044	55.355	707.45	61.3779	92.2306	Gehrels et al. (2011)
Surprise Canyon 2	UA	Surprise Canyon 2-56	72.6678	1.38364	891.434	23.7195	947.205	68.1073	947.205	68.1073	94.1121	Gehrels et al. (2011)
Surprise Canyon 2	UA	Surprise Canyon 2-81	569.122	0.179398	918.621	21.4867	954.905	14.974	954.905	14.974	96.2002	Gehrels et al. (2011)
Surprise Canyon 2	UA	Surprise Canyon 2-58	67.4126	0.264563	934.989	26.8506	978.622	75.5579	978.622	75.5579	95.5414	Gehrels et al. (2011)
Surprise Canyon 2	UA	Surprise Canyon 2-73	155.042	1.43881	977.294	45.1414	981.507	25.5894	981.507	25.5894	99.5707	Gehrels et al. (2011)
Surprise Canyon 2	UA	Surprise Canyon 2-98	272.111	0.276321	999.336	9.5059	982.127	35.1163	982.127	35.1163	101.752	Gehrels et al. (2011)
Surprise Canyon 2	UA	Surprise Canyon 2-50	35.2675	0.903589	958.662	22.4848	984.429	68.0656	984.429	68.0656	97.3826	Gehrels et al. (2011)
Surprise Canyon 2	UA	Surprise Canyon 2-83	123.265	0.16058	969.541	18.8347	996.04	57.3543	996.04	57.3543	97.3395	Gehrels et al. (2011)
Surprise Canyon 2	UA	Surprise Canyon 2-54	70.0872	0.458995	980.836	47.5672	1008.1	44.2646	1008.1	44.2646	97.2954	Gehrels et al. (2011)
Surprise Canyon 2	UA	Surprise Canyon 2-38	266.554	0.225092	990.919	23.8836	1010.16	25.195	1010.16	25.195	98.0949	Gehrels et al. (2011)
Surprise Canyon 2	UA	Surprise Canyon 2-93	412.417	0.107518	1004.74	18.59	1012.39	16.45	1012.39	16.45	99.2443	Gehrels et al. (2011)
Surprise Canyon 2	UA	Surprise Canyon 2-44	92.5055	0.440511	1015.74	31.9348	1013.38	78.7329	1013.38	78.7329	100.232	Gehrels et al. (2011)
Surprise Canyon 2	UA	Surprise Canyon 2-104	94.592	0.387604	1025.46	37.0496	1015.01	51.1904	1015.01	51.1904	101.029	Gehrels et al. (2011)
Surprise Canyon 2	UA	Surprise Canyon 2-18	72.705	0.860481	995.032	33.0447	1017.43	35.4819	1017.43	35.4819	97.7983	Gehrels et al. (2011)
Surprise Canyon 2	UA	Surprise Canyon 2-29	161.53	1.79741	956.792	38.0856	1021.85	63.258	1021.85	63.258	93.6335	Gehrels et al. (2011)
Surprise Canyon 2	UA	Surprise Canyon 2-74	151.223	0.760387	1028.23	35.3934	1026.72	41.0668	1026.72	41.0668	100.147	Gehrels et al. (2011)
Surprise Canyon 2	UA	Surprise Canyon 2-59	129.132	0.385023	1014.18	21.9552	1029.04	58.0535	1029.04	58.0535	98.5563	Gehrels et al. (2011)
Surprise Canyon 2	UA	Surprise Canyon 2-85	70.0038	0.290034	1041.93	38.7945	1032.65	79.0391	1032.65	79.0391	100.898	Gehrels et al. (2011)
Surprise Canyon 2	UA	Surprise Canyon 2-19	226.993	2.36541	1023.43	28.1109	1033.44	14.6214	1033.44	14.6214	99.0316	Gehrels et al. (2011)
Surprise Canyon 2	UA	Surprise Canyon 2-9	353.169	1.3527	1058.57	21.2557	1033.59	27.5093	1033.59	27.5093	102.417	Gehrels et al. (2011)
Surprise Canyon 2	UA	Surprise Canyon 2-17	164.325	0.507341	1029.67	42.974	1040.11	52.2986	1040.11	52.2986	98.9969	Gehrels et al. (2011)
Surprise Canyon 2	UA	Surprise Canyon 2-51	82.9908	0.255683	970.503	28.9179	1041.47	77.8515	1041.47	77.8515	93.1862	Gehrels et al. (2011)
Surprise Canyon 2	UA	Surprise Canyon 2-30	234.346	0.561681	1049.05	32.2363	1043.03	30.7405	1043.03	30.7405	100.577	Gehrels et al. (2011)
Surprise Canyon 2	UA	Surprise Canyon 2-41	150.428	0.479703	1047.41	35.3703	1043.5	33.1552	1043.5	33.1552	100.374	Gehrels et al. (2011)
Surprise Canyon 2	UA	Surprise Canyon 2-45	162.994	0.363487	1052.22	55.9253	1046.12	39.7883	1046.12	39.7883	100.583	Gehrels et al. (2011)
Surprise Canyon 2	UA	Surprise Canyon 2-11	278.206	0.517128	1054.64	31.6257	1051.16	18.1542	1051.16	18.1542	100.331	Gehrels et al. (2011)
Surprise Canyon 2	UA	Surprise Canyon 2-27	347.407	0.609443	1066.4	35.7573	1061.47	26.1301	1061.47	26.1301	100.465	Gehrels et al. (2011)
Surprise Canyon 2	UA	Surprise Canyon 2-86	170.767	0.411972	1047.58	28.7779	1068.41	44.8585	1068.41	44.8585	98.05	Gehrels et al. (2011)
Surprise Canyon 2	UA	Surprise Canyon 2-3	231.177	0.358275	1081.91	21.1496	1071.59	26.2818	1071.59	26.2818	100.963	Gehrels et al. (2011)
Surprise Canyon 2	UA	Surprise Canyon 2-7	76.1833	0.68725	1009.37	60.1718	1072.7	44.4993	1072.7	44.4993	94.0965	Gehrels et al. (2011)
Surprise Canyon 2	UA	Surprise Canyon 2-42	166.52	0.780655	1036.01	36.3792	1073.95	47.5142	1073.95	47.5142	96.4674	Gehrels et al. (2011)
Surprise Canyon 2	UA	Surprise Canyon 2-105	68.2189	0.661524	1057.49	58.2034	1074.94	41.1253	1074.94	41.1253	98.3767	Gehrels et al. (2011)
Surprise Canyon 2	UA	Surprise Canyon 2-100	120.917	0.37198	1064.35	13.5397	1076.38	71.8397	1076.38	71.8397	98.8824	Gehrels et al. (2011)
Surprise Canyon 2	UA	Surprise Canyon 2-89	90.8569	0.563198	1034.63	46.4614	1076.65	39.5816	1076.65	39.5816	96.0967	Gehrels et al. (2011)
Surprise Canyon 2	UA	Surprise Canyon 2-101	133.257	0.802046	1066.05	28.5944	1093.58	27.8005	1093.58	27.8005	97.4822	Gehrels et al. (2011)
Surprise Canyon 2	UA	Surprise Canyon 2-87	192.592	0.037833	1040.01	47.6492	1100.77	37.7419	1100.77	37.7419	94.48	Gehrels et al. (2011)
Surprise Canyon 2	UA	Surprise Canyon 2-55	47.6028	0.445775	943.579	35.6509	1114.66	62.9728	1114.66	62.9728	84.6517	Gehrels et al. (2011)
Surprise Canyon 2	UA	Surprise Canyon 2-80	103.386	0.622559	1129.58	42.0366	1120.81	77.6097	1120.81	77.6097	100.782	Gehrels et al. (2011)
Surprise Canyon 2	UA	Surprise Canyon 2-90	95.705	0.526482	1143.89	44.9875	1129.21	64.8121	1129.21	64.8121	101.3	Gehrels et al. (2011)
Surprise Canyon 2	UA	Surprise Canyon 2-79	151.445	0.633555	1112.66	46.3898	1130.47	27.5069	1130.47	27.5069	98.4247	Gehrels et al. (2011)
Surprise Canyon 2	UA	Surprise Canyon 2-33	172.869	1.52378	1128.53	32.6859	1131.65	38.6744	1131.65	38.6744	99.7249	Gehrels et al. (2011)
Surprise Canyon 2	UA	Surprise Canyon 2-92	40.5848	0.29512	1114.39	82.212	1133.46	34.2854	1133.46	34.2854	98.3181	Gehrels et al. (2011)
Surprise Canyon 2	UA	Surprise Canyon 2-52	89.387	0.228377	1151.47	30.6099	1136.26	53.1617	1136.26	53.1617	101.339	Gehrels et al. (2011)
Surprise Canyon 2	UA	Surprise Canyon 2-68	285.278	0.304985	1138.74	35.1928	1145.81	28.5203	1145.81	28.5203	99.3832	Gehrels et al. (2011)
Surprise Canyon 2	UA	Surprise Canyon 2-43	326.897	0.253546	1122.28	38.7374	1146.64	18.9488	1146.64	18.9488	97.8761	Gehrels et al. (2011)
Surprise Canyon 2	UA	Surprise Canyon 2-64	50.6901	1.12236	1102.2	55.9336	1151.82	24.676	1151.82	24.676	95.6925	Gehrels et al. (2011)
Surprise Canyon 2	UA	Surprise Canyon 2-97	224.66	0.157391	1116.29	26.5443	1172.89	24.7709	1172.89	24.7709	95.1746	Gehrels et al. (2011)
Surprise Canyon 2	UA	Surprise Canyon 2-34	67.8746	0.530405	1187.96	63.8432	1174.32	50.9152	1174.32	50.9152	101.161	Gehrels et al. (2011)
Surprise Canyon 2	UA	Surprise Canyon 2-47	149.738	0.19394	1133.23	28.657	1177.47	45.7218	1177.47	45.7218	96.2427	Gehrels et al. (2011)
Surprise Canyon 2	UA	Surprise Canyon 2-4	142.873	0.0890467	1165.16	20.7323	1186.72	40.7367	1186.72	40.7367	98.1827	Gehrels et al. (2011)
Surprise Canyon 2	UA	Surprise Canyon 2-24	103.175	0.370248	1195.56	28.9054	1202.46	51.3077	1202.46	51.3077	99.4259	Gehrels et al. (2011)
Surprise Canyon 2	UA	Surprise Canyon 2-15	118.029	0.278321	1205.1	42.7179	1202.58	34.2537	1202.58	34.2537	100.21	Gehrels et al. (2011)
Surprise Canyon 2	UA	Surprise Canyon 2-48	199.235	0.211625	1143.48	36.8082	1208.32	38.8907	1208.32	38.8907	94.6341	Gehrels et al. (2011)
Surprise Canyon 2	UA	Surprise Canyon 2-36	138.333	0.288979	1211.83	65.6095	1209.66	40.3911	1209.66	40.3911	100.179	Gehrels et al. (2011)
Surprise Canyon 2	UA	Surprise Canyon 2-28	261.612	1.15686	1057.57	19.8001	1209.83	63.885	1209.83	63.885	87.4145	Gehrels et al. (2011)
Surprise Canyon 2	UA	Surprise Canyon 2-62	72.7834	0.633962	1186.13	23.2757	1210.65	74.1806	1210.65	74.1806	97.9748	Gehrels et al. (2011)
Surprise Canyon 2	UA	Surprise Canyon 2-76	55.7149	0.722735	1176.97	45.8609	1216.68	28.929	1216.68	28.929	96.736	Gehrels et al. (2011)
Surprise Canyon 2	UA	Surprise Canyon 2-94	32.6309	0.191386	1101.4	96.3545	1223.47	53.5694	1223.47	53.5694	90.0229	Gehrels et al. (2011)
Surprise Canyon 2	UA	Surprise Canyon 2-84	143.128	0.474184	1227.57	28.2949	1227.86	25.0346	1227.86	25.0346	99.9762	Gehrels et al. (2011)
Surprise Canyon 2	UA	Surprise Canyon 2-49	15.9924	0.230914	1120.74	86.5035	1235.91	58.2458	1235.91	58.2458	90.6814	Gehrels et al. (2011)
Surprise Canyon 2	UA	Surprise Canyon 2-53	167.761	0.264352	1221.71	31.3361	1250.77	16.5483	1250.77	16.5483	97.6773	Gehrels et al. (2011)
Surprise Canyon 2	UA	Surprise Canyon 2-66	41.7437	0.329037	1073.18	45.2006	1270.27	127.227	1270.27	127.227	84.4849	Gehrels et al. (2011)
Surprise Canyon 2	UA	Surprise Canyon 2-67	57.0895	0.354023	1231.06	46.2227	1272.42	65.3616	1272.42	65.3616	96.7492	Gehrels et al. (2011)
Surprise Canyon 2	UA	Surprise Canyon 2-32	238.539	0.204082	1284.84	38.2099	1281.33	14.6128	1281.33	14.6128	100.273	Gehrels et al. (2011)
Surprise Canyon 2	UA	Surprise Canyon 2-25	30.4318	0.506725	1299.62	50.1898	1307.07	48.1984	1307.07	48.1984	99.4295	Gehrels et al. (2011)
Surprise Canyon 2	UA	Surprise Canyon 2-23	91.4416	0.299003	1319.51	48.0261	1317.93	71.9162	1317.93	71.9162	100.12	Gehrels et al. (2011)
Surprise Canyon 2	UA	Surprise Canyon 2-82	141.89	0.206548	1292.74	50.0637	1327.02	22.6854	1327.02	22.6854	97.4171	Gehrels et al. (2011)
Surprise Canyon 2	UA	Surprise Canyon 2-60	136.757	0.320132	1334.31	22.0591	1377.58	38.2649	1377.58	38.2649	96.859	Gehrels et al. (2011)
Surprise Canyon 2	UA	Surprise Canyon 2-71	84.9663	0.412926	1395.27	73.0372	1407.39	63.2698	1407.39	63.2698	99.1384	Gehrels et al. (2011)
Surprise Canyon 2	UA	Surprise Canyon 2-40	89.4794	0.393672	1346.65	37.7917	1420.89	62.2811	1420.89	62.2811	94.7757	Gehrels et al. (2011)
Surprise Canyon 2	UA	Surprise Canyon 2-12	146.64	0.81185	1432.23	33.9415	1421.29	25.7442	1421.29	25.7442	100.77	Gehrels et al. (2011)
Surprise Canyon 2	UA	Surprise Canyon 2-78	164.052	0.648547	1378.14	75.878	1421.83	54.111	1421.83	54.111	96.9269	Gehrels et al. (2011)
Surprise Canyon 2	UA	Surprise Canyon 2-31	52.5099	0.89615	1425.53	57.011	1422.98	49.7945	1422.98	49.7945	100.179	Gehrels et al. (2011)
Surprise Canyon 2	UA	Surprise Canyon 2-37	308.211	0.184124	1437.12	61.9251	1436.93	13.3531	1436.93	13.3531	100.013	Gehrels et al. (2011)
Surprise Canyon 2	UA	Surprise Canyon 2-39	125.747	0.286772	1448.47	35.3639	1444.88	26.9114	1444.88	26.9114	100.248	Gehrels et al. (2011)
Surprise Canyon 2	UA	Surprise Canyon 2-46	238.373	0.384641	1410.14	38.2416	1448.19	22.4884	1448.19	22.4884	97.3729	Gehrels et al. (2011)
Surprise Canyon 2	UA	Surprise Canyon 2-8	77.8243	1.41914	1457.78	21.0893	1454.64	28.0901	1454.64	28.0901	100.216	Gehrels et al. (2011)
Surprise Canyon 2	UA	Surprise Canyon 2-22	118.189	0.251673	1505.89	47.0242	1517.59	31.984	1517.59	31.984	99.2294	Gehrels et al. (2011)
Surprise Canyon 2	UA	Surprise Canyon 2-103	70.7272	0.937311	1483.48	44.7531	1517.72	56.3647	1517.72	56.3647	97.7443	Gehrels et al. (2011)
Surprise Canyon 2	UA	Surprise Canyon 2-91	599.569	0.201202	1549.45	27.4881	1618.26	9.33173	1618.26	9.33173	95.7478	Gehrels et al. (2011)
Surprise Canyon 2	UA	Surprise Canyon 2-63	78.2296	0.734363	1622.43	53.5256	1636.57	49.4011	1636.57	49.4011	99.1361	Gehrels et al. (2011)
Surprise Canyon 2	UA	Surprise Canyon 2-61	75.3223	0.452686	1636.57	85.2472	1648.81	47.6145	1648.81	47.6145	99.2576	Gehrels et al. (2011)
Surprise Canyon 2	UA	Surprise Canyon 2-20	94.1636	0.983255	1633.56	73.7171	1650.09	21.2432	1650.09	21.2432	98.9983	Gehrels et al. (2011)
Surprise Canyon 2	UA	Surprise Canyon 2-69	398.58	0.352047	1544.85	27.5905	1680.14	9.7617	1680.14	9.7617	91.9475	Gehrels et al. (2011)
Surprise Canyon 2	UA	Surprise Canyon 2-16	387.083	0.71608	1736.54	31.4128	1735.6	12.4815	1735.6	12.4815	100.055	Gehrels et al. (2011)
Surprise Canyon 2	UA	Surprise Canyon 2-95	120.845	0.175014	1786.07	100.089	1779.42	16.8558	1779.42	16.8558	100.373	Gehrels et al. (2011)
Surprise Canyon 2	UA	Surprise Canyon 2-35	301.485	0.839172	1836.36	58.8308	1841.46	7.90988	1841.46	7.90988	99.7231	Gehrels et al. (2011)
Surprise Canyon 2	UA	Surprise Canyon 2-2	300.053	0.591549	1874.68	32.7299	1880.63	12.3013	1880.63	12.3013	99.6834	Gehrels et al. (2011)
Surprise Canyon 2	UA	Surprise Canyon 2-14	136.641	0.499861	1893.62	46.0266	2013.99	17.851	2013.99	17.851	94.0233	Gehrels et al. (2011)
Surprise Canyon 2	UA	Surprise Canyon 2-70	129.238	0.471689	2090.12	99.0363	2095.25	10.1414	2095.25	10.1414	99.7552	Gehrels et al. (2011)
Surprise Canyon 2	UA	Surprise Canyon 2-101	105.375	0.979726	2636.29	58.1051	2632.35	11.6817	2632.35	11.6817	100.15	Gehrels et al. (2011)
Surprise Canyon 2	UA	Surprise Canyon 2-6	109.027	0.88932	2765.68	52.6074	2776.1	9.10144	2776.1	9.10144	99.6246	Gehrels et al. (2011)
Surprise Canyon 2	UA	Surprise Canyon 2-77	91.4672	1.13067	2818.19	131.143	2817.11	10.5667	2817.11	10.5667	100.038	Gehrels et al. (2011)
Surprise Canyon 3	UA	06GC149-36	443.754	1.2066	309.368	7.55865	331.957	68.3162	309.368	7.55865	93.195	Gehrels et al. (2011)
Surprise Canyon 3	UA	06GC149-18	621.656	0.68706	451.148	11.7316	276.717	156.825	451.148	11.7316	163.036	Gehrels et al. (2011)
Surprise Canyon 3	UA	06GC149-72	209.281	0.287306	460.715	13.3733	467.345	79.9394	460.715	13.3733	98.5813	Gehrels et al. (2011)
Surprise Canyon 3	UA	06GC149-77	291.015	0.639784	465.067	11.2516	475.976	65.8325	465.067	11.2516	97.7081	Gehrels et al. (2011)
Surprise Canyon 3	UA	06GC149-92	551.291	1.12651	613.889	9.06601	622.214	33.1685	613.889	9.06601	98.6621	Gehrels et al. (2011)
Surprise Canyon 3	UA	06GC149-61	178.961	1.83261	630.312	9.60764	659.073	53.6258	630.312	9.60764	95.6361	Gehrels et al. (2011)
Surprise Canyon 3	UA	06GC149-84	523.81	1.0127	634.063	9.52167	629.377	30.7637	634.063	9.52167	100.745	Gehrels et al. (2011)
Surprise Canyon 3	UA	06GC149-93	231.949	0.837598	641.949	14.4707	671.402	58.6032	641.949	14.4707	95.6133	Gehrels et al. (2011)
Surprise Canyon 3	UA	06GC149-91	230.012	0.730212	773.974	15.9527	752.501	52.6975	773.974	15.9527	102.854	Gehrels et al. (2011)
Surprise Canyon 3	UA	06GC149-51	264.308	0.266842	996.995	16.4051	1037.45	28.9606	1037.45	28.9606	96.1006	Gehrels et al. (2011)
Surprise Canyon 3	UA	06GC149-64	184.776	0.803232	1001.08	21.5286	1038.74	36.1884	1038.74	36.1884	96.3742	Gehrels et al. (2011)
Surprise Canyon 3	UA	06GC149-86	416.75	0.468701	1067.46	13.4077	1048.29	21.7202	1048.29	21.7202	101.829	Gehrels et al. (2011)
Surprise Canyon 3	UA	06GC149-53	808.083	0.192495	1022.72	9.50564	1076.83	14.4348	1076.83	14.4348	94.9752	Gehrels et al. (2011)
Surprise Canyon 3	UA	06GC149-30	939.965	0.787101	1061.62	8.87182	1083.82	12.7925	1083.82	12.7925	97.9518	Gehrels et al. (2011)
Surprise Canyon 3	UA	06GC149-16	359.586	0.241812	1033.38	15.1743	1089.47	24.0583	1089.47	24.0583	94.8518	Gehrels et al. (2011)
Surprise Canyon 3	UA	06GC149-50	575.462	0.458281	1024.64	11.35	1100.43	17.4171	1100.43	17.4171	93.1127	Gehrels et al. (2011)
Surprise Canyon 3	UA	06GC149-9	325.781	0.309776	1116.77	15.7084	1102.32	22.4279	1102.32	22.4279	101.311	Gehrels et al. (2011)
Surprise Canyon 3	UA	06GC149-62	44.8825	0.45452	1026.75	14.4277	1116.16	48.7359	1116.16	48.7359	91.9894	Gehrels et al. (2011)
Surprise Canyon 3	UA	06GC149-69	33.1989	0.697141	1016.87	26.5289	1125.5	31.0023	1125.5	31.0023	90.3481	Gehrels et al. (2011)
Surprise Canyon 3	UA	06GC149-75	1373.99	0.513262	1156.13	7.59218	1146.75	9.77229	1146.75	9.77229	100.818	Gehrels et al. (2011)
Surprise Canyon 3	UA	06GC149-11	195.919	0.216287	1134.74	21.0248	1159.04	38.2567	1159.04	38.2567	97.904	Gehrels et al. (2011)
Surprise Canyon 3	UA	06GC149-80	51.1587	0.651973	1144.96	29.0614	1161.53	58.9172	1161.53	58.9172	98.5732	Gehrels et al. (2011)
Surprise Canyon 3	UA	06GC149-29	126.423	0.382631	1209.83	30.8744	1194.91	49.7608	1194.91	49.7608	101.248	Gehrels et al. (2011)
Surprise Canyon 3	UA	06GC149-14	169.835	0.271345	1213.28	30.1545	1197.93	34.5621	1197.93	34.5621	101.281	Gehrels et al. (2011)
Surprise Canyon 3	UA	06GC149-47	52.4221	0.868959	1117.22	30.6708	1205.34	35.0003	1205.34	35.0003	92.6891	Gehrels et al. (2011)
Surprise Canyon 3	UA	06GC149-38	92.4143	0.519262	1235.22	35.0931	1251.24	48.0641	1251.24	48.0641	98.7197	Gehrels et al. (2011)
Surprise Canyon 3	UA	06GC149-33	95.8442	0.225985	1239.82	32.1081	1280.93	56.7141	1280.93	56.7141	96.7904	Gehrels et al. (2011)
Surprise Canyon 3	UA	06GC149-44	137.879	0.432284	1349.72	31.6692	1343.9	33.1991	1343.9	33.1991	100.433	Gehrels et al. (2011)
Surprise Canyon 3	UA	06GC149-65	93.1242	0.403438	1382.49	44.3186	1370.29	42.5184	1370.29	42.5184	100.89	Gehrels et al. (2011)
Surprise Canyon 3	UA	06GC149-74	80.2464	0.645441	1242.16	12.4369	1413.97	64.9759	1413.97	64.9759	87.849	Gehrels et al. (2011)
Surprise Canyon 3	UA	06GC149-3	635.788	0.527902	1165.87	11.4591	1419.62	14.1061	1419.62	14.1061	82.1259	Gehrels et al. (2011)
Surprise Canyon 3	UA	06GC149-12	533.002	0.220316	1428.21	14.174	1428.3	13.2549	1428.3	13.2549	99.9936	Gehrels et al. (2011)
Surprise Canyon 3	UA	06GC149-37	503.179	0.204516	1438.84	14.912	1440.07	14.4652	1440.07	14.4652	99.9149	Gehrels et al. (2011)
Surprise Canyon 3	UA	06GC149-35	76.3014	0.305117	1409.05	25.6989	1443.08	57.8082	1443.08	57.8082	97.642	Gehrels et al. (2011)
Surprise Canyon 3	UA	06GC149-99	953.937	0.455743	1404.18	9.49896	1445.72	7.9428	1445.72	7.9428	97.127	Gehrels et al. (2011)
Surprise Canyon 3	UA	06GC149-73	152.38	0.319364	1431.85	26.4415	1452.74	28.0591	1452.74	28.0591	98.5624	Gehrels et al. (2011)
Surprise Canyon 3	UA	06GC149-42	388.134	0.324302	1417.06	16.5065	1463.61	19.9694	1463.61	19.9694	96.8196	Gehrels et al. (2011)
Surprise Canyon 3	UA	06GC149-85	93.6246	0.343368	1647.47	39.677	1627.32	30.5128	1627.32	30.5128	101.238	Gehrels et al. (2011)
Surprise Canyon 3	UA	06GC149-41	196.452	0.322691	1612.78	27.2461	1627.77	19.5693	1627.77	19.5693	99.0792	Gehrels et al. (2011)
Surprise Canyon 3	UA	06GC149-97	246.851	1.20815	1569.5	22.7233	1636.46	18.5231	1636.46	18.5231	95.9081	Gehrels et al. (2011)
Surprise Canyon 3	UA	06GC149-83	504.605	1.10022	1533.31	14.0538	1637.92	11.3252	1637.92	11.3252	93.6133	Gehrels et al. (2011)
Surprise Canyon 3	UA	06GC149-98	343.443	0.707446	1639.48	21.3066	1641.57	23.4682	1641.57	23.4682	99.8722	Gehrels et al. (2011)
Surprise Canyon 3	UA	06GC149-95	175.701	0.363245	1520.7	24.1631	1643.97	22.8162	1643.97	22.8162	92.5022	Gehrels et al. (2011)
Surprise Canyon 3	UA	06GC149-4	177.384	0.463972	1533.21	28.4533	1645.27	23.0138	1645.27	23.0138	93.1891	Gehrels et al. (2011)
Surprise Canyon 3	UA	06GC149-79	140.839	0.819891	1556.12	32.0583	1665.07	25.503	1665.07	25.503	93.4566	Gehrels et al. (2011)
Surprise Canyon 3	UA	06GC149-34	170.944	0.549156	1553.57	30.3922	1674.66	25.2171	1674.66	25.2171	92.7692	Gehrels et al. (2011)
Surprise Canyon 3	UA	06GC149-81	1369.61	0.102372	1576.28	9.00755	1675.24	6.28639	1675.24	6.28639	94.0928	Gehrels et al. (2011)
Surprise Canyon 3	UA	06GC149-89	176.693	0.253341	1654.01	29.8112	1675.54	21.5749	1675.54	21.5749	98.7148	Gehrels et al. (2011)
Surprise Canyon 3	UA	06GC149-49	465.851	1.13906	1575.09	17.5784	1677.6	11.6542	1677.6	11.6542	93.8894	Gehrels et al. (2011)
Surprise Canyon 3	UA	06GC149-67	291.797	0.625431	1591.47	22.0666	1679.89	15.044	1679.89	15.044	94.7362	Gehrels et al. (2011)
Surprise Canyon 3	UA	06GC149-90	358.073	0.49968	1705.66	19.8394	1684.01	12.5307	1684.01	12.5307	101.286	Gehrels et al. (2011)
Surprise Canyon 3	UA	06GC149-87	174.17	0.398303	1671.88	30.1817	1687.76	19.3778	1687.76	19.3778	99.0591	Gehrels et al. (2011)
Surprise Canyon 3	UA	06GC149-100	287.825	0.898479	1703.03	22.5362	1703.7	14.5634	1703.7	14.5634	99.9606	Gehrels et al. (2011)
Surprise Canyon 3	UA	06GC149-27	393.161	0.487051	1728.85	17.5491	1717.4	11.3907	1717.4	11.3907	100.666	Gehrels et al. (2011)
Surprise Canyon 3	UA	06GC149-39	80.2823	0.760355	1687.26	47.3616	1718.85	34.2652	1718.85	34.2652	98.1626	Gehrels et al. (2011)
Surprise Canyon 3	UA	06GC149-45	1222.97	0.0360955	1440.58	8.89134	1720.69	7.17111	1720.69	7.17111	83.7208	Gehrels et al. (2011)
Surprise Canyon 3	UA	06GC149-56	133.28	1.08053	1740.33	40.0053	1725.55	22.3773	1725.55	22.3773	100.856	Gehrels et al. (2011)
Surprise Canyon 3	UA	06GC149-21	610.311	0.368168	1583.29	14.4473	1729.34	11.4963	1729.34	11.4963	91.5542	Gehrels et al. (2011)
Surprise Canyon 3	UA	06GC149-60	220.628	0.597022	1629.95	24.5551	1731.26	16.5333	1731.26	16.5333	94.1481	Gehrels et al. (2011)
Surprise Canyon 3	UA	06GC149-5	102.436	0.764219	1694.69	37.8478	1740.7	31.304	1740.7	31.304	97.3571	Gehrels et al. (2011)
Surprise Canyon 3	UA	06GC149-19	174.634	0.745703	1707.71	30.8652	1743.89	18.5196	1743.89	18.5196	97.9254	Gehrels et al. (2011)
Surprise Canyon 3	UA	06GC149-54	271.648	0.533586	1627.98	20.1179	1750.97	14.798	1750.97	14.798	92.976	Gehrels et al. (2011)
Surprise Canyon 3	UA	06GC149-58	107.483	0.723865	1601.18	36.1282	1751.61	26.9465	1751.61	26.9465	91.4118	Gehrels et al. (2011)
Surprise Canyon 3	UA	06GC149-57	771.124	0.431243	1762.56	13.7848	1764.38	9.12366	1764.38	9.12366	99.8966	Gehrels et al. (2011)
Surprise Canyon 3	UA	06GC149-40	195.697	0.316155	1757.66	24.6297	1768.44	17.0781	1768.44	17.0781	99.3906	Gehrels et al. (2011)
Surprise Canyon 3	UA	06GC149-6	346.712	0.340785	1767.73	18.9732	1775.43	12.1563	1775.43	12.1563	99.5663	Gehrels et al. (2011)
Surprise Canyon 3	UA	06GC149-15	891.125	0.207506	1764.25	11.3184	1787.55	7.35914	1787.55	7.35914	98.6962	Gehrels et al. (2011)
Surprise Canyon 3	UA	06GC149-71	432.053	0.348167	1800.64	17.4879	1814.76	10.554	1814.76	10.554	99.2219	Gehrels et al. (2011)
Surprise Canyon 3	UA	06GC149-96	111.451	0.577474	1805.64	39.1468	1820.25	31.8099	1820.25	31.8099	99.1971	Gehrels et al. (2011)
Surprise Canyon 3	UA	06GC149-13	421.742	0.0178163	1923.5	17.3941	1907.74	10.805	1907.74	10.805	100.826	Gehrels et al. (2011)
Surprise Canyon 3	UA	06GC149-26	203.501	0.291233	1901.24	26.4305	1940.69	14.9911	1940.69	14.9911	97.9672	Gehrels et al. (2011)
Surprise Canyon 3	UA	06GC149-31	105.002	0.592902	1945.29	43.811	1959.26	24.1621	1959.26	24.1621	99.2873	Gehrels et al. (2011)
Surprise Canyon 3	UA	06GC149-59	91.0841	0.563213	1967.78	24.4205	1963.7	49.8952	1963.7	49.8952	100.208	Gehrels et al. (2011)
Surprise Canyon 3	UA	06GC149-17	144.125	0.504537	1971.44	41.8037	1982.06	17.8287	1982.06	17.8287	99.4643	Gehrels et al. (2011)
Surprise Canyon 3	UA	06GC149-70	150.773	1.1719	1979.89	37.565	1985.8	17.6483	1985.8	17.6483	99.702	Gehrels et al. (2011)
Surprise Canyon 3	UA	06GC149-7	203.782	0.535557	1979.74	26.0103	1995.36	14.2431	1995.36	14.2431	99.217	Gehrels et al. (2011)
Surprise Canyon 3	UA	06GC149-8	97.7766	0.468597	2005.71	41.1123	2012.95	23.4957	2012.95	23.4957	99.6406	Gehrels et al. (2011)
Surprise Canyon 3	UA	06GC149-68	125.372	0.689736	2000.17	38.6802	2062.89	18.1851	2062.89	18.1851	96.9595	Gehrels et al. (2011)
Surprise Canyon 3	UA	06GC149-88	168.101	1.02877	2148.69	29.5049	2222.96	13.3253	2222.96	13.3253	96.6592	Gehrels et al. (2011)
Surprise Canyon 3	UA	06GC149-78	162.447	0.669098	2479.31	36.1219	2569.28	10.8835	2569.28	10.8835	96.4981	Gehrels et al. (2011)
Surprise Canyon 3	UA	06GC149-76	78.8592	0.821001	2519.69	57.8716	2608.91	17.0937	2608.91	17.0937	96.5804	Gehrels et al. (2011)
Surprise Canyon 3	UA	06GC149-82	175.543	0.525702	2792.02	40.9117	2773.07	16.1387	2773.07	16.1387	100.683	Gehrels et al. (2011)
Surprise Canyon 3	UA	06GC149-66	148.201	0.683617	2723.81	44.639	2862.45	9.25779	2862.45	9.25779	95.1569	Gehrels et al. (2011)
Surprise Canyon 3	UA	06GC149-94	146.737	0.604404	2891.34	40.7975	2928.82	8.97948	2928.82	8.97948	98.72	Gehrels et al. (2011)
Surprise Canyon 3	UA	06GC149-10	168.764	1.14725	3779.47	45.9654	3755.89	5.29031	3755.89	5.29031	100.628	Gehrels et al. (2011)
Watahomigi	UA	Watahomigi-23	271.925	0.653886	392.666	12.2284	378.419	68.3081	392.666	12.2284	103.765	Gehrels et al. (2011)
Watahomigi	UA	Watahomigi-76	396.121	0.610963	409.955	7.74525	500.665	67.5575	409.955	7.74525	81.8822	Gehrels et al. (2011)
Watahomigi	UA	Watahomigi-103	122.101	0.188815	415.999	20.0625	260.372	187.832	415.999	20.0625	159.771	Gehrels et al. (2011)
Watahomigi	UA	Watahomigi-72	238.538	0.398437	423.572	2.62372	386.295	78.7951	423.572	2.62372	109.65	Gehrels et al. (2011)
Watahomigi	UA	Watahomigi-36	357.847	0.592717	442.4	10.2615	461.38	30.4195	442.4	10.2615	95.8862	Gehrels et al. (2011)
Watahomigi	UA	Watahomigi-9	564.693	0.295739	446.835	7.98665	1318.13	185.337	446.835	7.98665	33.8991	Gehrels et al. (2011)
Watahomigi	UA	Watahomigi-2	97.8884	0.603517	451.662	6.06322	462.098	197.492	451.662	6.06322	97.7414	Gehrels et al. (2011)
Watahomigi	UA	Watahomigi-47	157.802	0.268455	465.478	5.83791	409.72	92.1835	465.478	5.83791	113.609	Gehrels et al. (2011)
Watahomigi	UA	Watahomigi-21	86.5199	0.460985	608.073	6.4991	616.436	89.2085	608.073	6.4991	98.6433	Gehrels et al. (2011)
Watahomigi	UA	Watahomigi-86	128.144	0.910124	618.108	11.847	702.883	110.528	618.108	11.847	87.9389	Gehrels et al. (2011)
Watahomigi	UA	Watahomigi-13	747.705	0.0445548	918.582	15.068	1011.59	27.5842	1011.59	27.5842	90.8058	Gehrels et al. (2011)
Watahomigi	UA	Watahomigi-56	423.984	0.108072	1031.47	12.6773	1019.62	44.9635	1019.62	44.9635	101.162	Gehrels et al. (2011)
Watahomigi	UA	Watahomigi-46	133.49	0.606201	1039.25	11.2297	1030.54	57.9037	1030.54	57.9037	100.845	Gehrels et al. (2011)
Watahomigi	UA	Watahomigi-74	237.96	1.23564	1053.74	16.915	1044.94	36.5484	1044.94	36.5484	100.842	Gehrels et al. (2011)
Watahomigi	UA	Watahomigi-97	161.592	0.600292	1039.59	15.2655	1055.46	33.4733	1055.46	33.4733	98.4963	Gehrels et al. (2011)
Watahomigi	UA	Watahomigi-75	154.611	0.295058	1006.32	21.243	1061.68	41.3103	1061.68	41.3103	94.7858	Gehrels et al. (2011)
Watahomigi	UA	Watahomigi-24	319.653	0.539395	926.613	11.8252	1063.59	59.4705	1063.59	59.4705	87.1215	Gehrels et al. (2011)
Watahomigi	UA	Watahomigi-67	278.447	0.415123	1056.43	18.3188	1063.78	38.8587	1063.78	38.8587	99.3086	Gehrels et al. (2011)
Watahomigi	UA	Watahomigi-31	66.8545	0.695298	957.165	29.1757	1083.5	99.5496	1083.5	99.5496	88.3404	Gehrels et al. (2011)
Watahomigi	UA	Watahomigi-49	248.869	0.272469	1069.29	28.2789	1087.09	59.8557	1087.09	59.8557	98.3621	Gehrels et al. (2011)
Watahomigi	UA	Watahomigi-27	25.2699	0.841628	1058.25	19.0311	1092.36	49.8666	1092.36	49.8666	96.877	Gehrels et al. (2011)
Watahomigi	UA	Watahomigi-44	329.226	0.452721	965.628	15.4248	1100.9	67.0238	1100.9	67.0238	87.7126	Gehrels et al. (2011)
Watahomigi	UA	Watahomigi-51	87.5969	0.827401	1118.8	5.13556	1133.69	53.9815	1133.69	53.9815	98.6867	Gehrels et al. (2011)
Watahomigi	UA	Watahomigi-48	166.757	0.326621	1182.73	28.2031	1161.38	50.652	1161.38	50.652	101.838	Gehrels et al. (2011)
Watahomigi	UA	Watahomigi-35	114.841	0.571891	1158.84	25.9861	1167.39	56.2423	1167.39	56.2423	99.2675	Gehrels et al. (2011)
Watahomigi	UA	Watahomigi-63	244.98	0.364433	1167.38	23.9185	1173.87	37.8766	1173.87	37.8766	99.4476	Gehrels et al. (2011)
Watahomigi	UA	Watahomigi-26	281	0.223469	1164.29	21.4106	1181.8	35.6065	1181.8	35.6065	98.5178	Gehrels et al. (2011)
Watahomigi	UA	Watahomigi-64	360.639	0.5429	1123.79	8.86906	1197.34	32.5538	1197.34	32.5538	93.8569	Gehrels et al. (2011)
Watahomigi	UA	Watahomigi-104	138.216	0.415542	1224.55	17.2867	1251.07	53.059	1251.07	53.059	97.8801	Gehrels et al. (2011)
Watahomigi	UA	Watahomigi-40	296.118	0.212839	1235.35	35.1876	1256.03	18.6659	1256.03	18.6659	98.3535	Gehrels et al. (2011)
Watahomigi	UA	Watahomigi-77	350.168	0.533786	1262.63	10.0907	1259.35	25.8106	1259.35	25.8106	100.261	Gehrels et al. (2011)
Watahomigi	UA	Watahomigi-34	66.7149	0.631959	1215.38	18.3878	1281.52	48.0518	1281.52	48.0518	94.8395	Gehrels et al. (2011)
Watahomigi	UA	Watahomigi-29	547.92	0.0111932	1322.8	12.7962	1355.76	35.2912	1355.76	35.2912	97.5684	Gehrels et al. (2011)
Watahomigi	UA	Watahomigi-19	234.948	0.386617	1351.58	18.8992	1402.44	31.6397	1402.44	31.6397	96.3736	Gehrels et al. (2011)
Watahomigi	UA	Watahomigi-45	34.225	0.341019	1446.12	20.4673	1424.4	70.4753	1424.4	70.4753	101.524	Gehrels et al. (2011)
Watahomigi	UA	Watahomigi-96	194.58	0.209864	1475.65	30.2039	1444.68	63.0872	1444.68	63.0872	102.144	Gehrels et al. (2011)
Watahomigi	UA	Watahomigi-79	459.146	0.758764	1461.1	7.58275	1457.78	60.9493	1457.78	60.9493	100.228	Gehrels et al. (2011)
Watahomigi	UA	Watahomigi-22	149.545	0.498145	1590.72	16.3524	1619.99	45.2444	1619.99	45.2444	98.1935	Gehrels et al. (2011)
Watahomigi	UA	Watahomigi-65	318.038	0.391718	1598.99	17.7014	1639.64	45.6915	1639.64	45.6915	97.5206	Gehrels et al. (2011)
Watahomigi	UA	Watahomigi-66	137.159	0.384917	1656.4	40.3161	1647.73	26.2239	1647.73	26.2239	100.526	Gehrels et al. (2011)
Watahomigi	UA	Watahomigi-43	239.735	0.965396	1638.73	24.0207	1653.85	35.4097	1653.85	35.4097	99.086	Gehrels et al. (2011)
Watahomigi	UA	Watahomigi-18	196.834	1.17288	1557.18	43.8537	1660.95	56.6872	1660.95	56.6872	93.7519	Gehrels et al. (2011)
Watahomigi	UA	Watahomigi-105	370.013	0.143385	1675.03	32.3049	1664.01	45.3499	1664.01	45.3499	100.662	Gehrels et al. (2011)
Watahomigi	UA	Watahomigi-14	249.667	1.1126	1606.39	27.158	1664.46	42.2506	1664.46	42.2506	96.5108	Gehrels et al. (2011)
Watahomigi	UA	Watahomigi-101	162.469	0.6139	1482.66	29.4043	1670.02	34.2415	1670.02	34.2415	88.7808	Gehrels et al. (2011)
Watahomigi	UA	Watahomigi-85	312.553	0.423303	1458.17	6.52551	1671.02	21.6034	1671.02	21.6034	87.2622	Gehrels et al. (2011)
Watahomigi	UA	Watahomigi-39	186.463	0.526714	1643.64	23.5036	1671.84	46.6605	1671.84	46.6605	98.3132	Gehrels et al. (2011)
Watahomigi	UA	Watahomigi-55	991.25	0.441904	1568.99	11.9768	1672.61	37.5399	1672.61	37.5399	93.8048	Gehrels et al. (2011)
Watahomigi	UA	Watahomigi-41	160.176	0.726682	1614.15	21.2762	1680.36	46.5113	1680.36	46.5113	96.0594	Gehrels et al. (2011)
Watahomigi	UA	Watahomigi-52	120.805	0.354011	1620.44	12.0358	1681.53	51.2106	1681.53	51.2106	96.3671	Gehrels et al. (2011)
Watahomigi	UA	Watahomigi-99	220.887	0.774575	1597.42	45.8434	1684.64	62.6266	1684.64	62.6266	94.8227	Gehrels et al. (2011)
Watahomigi	UA	Watahomigi-78	49.4229	1.98719	1613.84	37.1205	1689.25	55.3002	1689.25	55.3002	95.536	Gehrels et al. (2011)
Watahomigi	UA	Watahomigi-102	431.523	0.254375	1650.36	60.4273	1690.6	37.7235	1690.6	37.7235	97.6198	Gehrels et al. (2011)
Watahomigi	UA	Watahomigi-88	88.9731	0.587551	1675.89	14.7576	1693.53	42.6475	1693.53	42.6475	98.9584	Gehrels et al. (2011)
Watahomigi	UA	Watahomigi-50	309.481	0.509634	1590.88	55.5465	1702.34	18.7464	1702.34	18.7464	93.4521	Gehrels et al. (2011)
Watahomigi	UA	Watahomigi-80	671.198	0.163885	1521.72	10.4386	1706.12	32.5992	1706.12	32.5992	89.1918	Gehrels et al. (2011)
Watahomigi	UA	Watahomigi-8	294.224	0.294134	1719.02	14.7873	1718.27	20.4334	1718.27	20.4334	100.044	Gehrels et al. (2011)
Watahomigi	UA	Watahomigi-87	375.219	0.974179	1520.84	65.9792	1721.22	60.4727	1721.22	60.4727	88.3587	Gehrels et al. (2011)
Watahomigi	UA	Watahomigi-70	463.993	0.319552	1685.54	17.3535	1733.74	44.7671	1733.74	44.7671	97.22	Gehrels et al. (2011)
Watahomigi	UA	Watahomigi-59	124.235	0.548133	1439.26	27.8623	1736.9	29.3347	1736.9	29.3347	82.8638	Gehrels et al. (2011)
Watahomigi	UA	Watahomigi-93	105.088	0.602205	1735.78	36.5218	1743.31	38.4875	1743.31	38.4875	99.5684	Gehrels et al. (2011)
Watahomigi	UA	Watahomigi-94	518.741	0.52132	1730.9	16.698	1743.35	41.981	1743.35	41.981	99.2858	Gehrels et al. (2011)
Watahomigi	UA	Watahomigi-71	309.082	0.496119	1762.12	36.2329	1756.7	32.0228	1756.7	32.0228	100.309	Gehrels et al. (2011)
Watahomigi	UA	Watahomigi-89	447.558	0.85748	1419.47	42.6824	1759.61	97.3007	1759.61	97.3007	80.6699	Gehrels et al. (2011)
Watahomigi	UA	Watahomigi-30	324.52	0.506886	1780.98	30.6561	1781.1	53.2736	1781.1	53.2736	99.993	Gehrels et al. (2011)
Watahomigi	UA	Watahomigi-68	238.698	0.751309	1783.64	40.5126	1781.23	33.9288	1781.23	33.9288	100.136	Gehrels et al. (2011)
Watahomigi	UA	Watahomigi-90	263.948	0.947041	1565.99	21.5497	1781.65	59.6796	1781.65	59.6796	87.8955	Gehrels et al. (2011)
Watahomigi	UA	Watahomigi-37	346.219	0.25587	1751.9	16.2607	1787.9	17.8729	1787.9	17.8729	97.9861	Gehrels et al. (2011)
Watahomigi	UA	Watahomigi-83	66.9941	0.282615	1752.94	23.9434	1799.59	42.1209	1799.59	42.1209	97.4078	Gehrels et al. (2011)
Watahomigi	UA	Watahomigi-33	545.267	0.544107	1623.19	42.3321	1811.49	39.1547	1811.49	39.1547	89.605	Gehrels et al. (2011)
Watahomigi	UA	Watahomigi-5	256.129	0.742594	1691.75	10.8622	1820.72	35.7884	1820.72	35.7884	92.9165	Gehrels et al. (2011)
Watahomigi	UA	Watahomigi-42	223.639	0.532579	1760.8	16.7965	1868.68	60.6367	1868.68	60.6367	94.227	Gehrels et al. (2011)
Watahomigi	UA	Watahomigi-57	265.065	0.64885	1608.57	18.0843	1886.11	98.9344	1886.11	98.9344	85.2847	Gehrels et al. (2011)
Watahomigi	UA	Watahomigi-92	69.8861	0.334011	1787.76	11.0853	1914.22	33.5517	1914.22	33.5517	93.3936	Gehrels et al. (2011)
Watahomigi	UA	Watahomigi-98	587.829	0.493778	1619.77	32.2278	1921.55	102.263	1921.55	102.263	84.2948	Gehrels et al. (2011)
Watahomigi	UA	Watahomigi-28	99.7432	0.695729	1849.72	22.673	1993.93	22.233	1993.93	22.233	92.7674	Gehrels et al. (2011)
Watahomigi	UA	Watahomigi-20	287.801	0.256339	2005.82	58.6094	2003.99	32.3673	2003.99	32.3673	100.091	Gehrels et al. (2011)
Watahomigi	UA	Watahomigi-15	406.113	0.554064	2018.24	52.68	2056.11	36.1377	2056.11	36.1377	98.1582	Gehrels et al. (2011)
Watahomigi	UA	Watahomigi-25	514.253	0.339204	2096.28	8.94788	2440.27	23.5474	2440.27	23.5474	85.9036	Gehrels et al. (2011)
Watahomigi	UA	Watahomigi-11	9.03493	6.11455	2412.18	79.6926	2560.58	71.3582	2560.58	71.3582	94.2045	Gehrels et al. (2011)
Watahomigi	UA	Watahomigi-54	29.6577	0.787072	2427.68	44.1005	2613.04	60.8043	2613.04	60.8043	92.9065	Gehrels et al. (2011)
Watahomigi	UA	Watahomigi-3	322.286	0.338627	2504.17	10.3762	2701.04	18.5343	2701.04	18.5343	92.7115	Gehrels et al. (2011)
Watahomigi	UA	Watahomigi-16	383.476	0.207038	2403.35	12.0372	2724.11	30.9757	2724.11	30.9757	88.2251	Gehrels et al. (2011)
Watahomigi	UA	Watahomigi-58	348.373	1.05876	2658.37	37.9051	2724.68	19.3083	2724.68	19.3083	97.5662	Gehrels et al. (2011)
Watahomigi	UA	Watahomigi-1	229.044	0.402496	2518.19	62.5427	2756.5	21.9677	2756.5	21.9677	91.3548	Gehrels et al. (2011)
Watahomigi	UA	Watahomigi-6	211.553	1.62431	2752.41	30.0194	2759.33	10.698	2759.33	10.698	99.7494	Gehrels et al. (2011)
Watahomigi	UA	Watahomigi-32	507.931	0.226946	2782.94	82.272	2773.37	42.3201	2773.37	42.3201	100.345	Gehrels et al. (2011)
Watahomigi	UA	Watahomigi-91	60.7315	1.04204	2737.26	21.1883	2787.15	23.9189	2787.15	23.9189	98.2099	Gehrels et al. (2011)
Watahomigi	UA	Watahomigi-82	260.078	0.283663	2756.05	71.0934	2796.94	31.7502	2796.94	31.7502	98.5381	Gehrels et al. (2011)
Watahomigi	UA	Watahomigi-73	144.04	0.558797	2767.52	64.5793	2814.51	33.3344	2814.51	33.3344	98.3306	Gehrels et al. (2011)
Watahomigi	UA	Watahomigi-100	256.887	0.390058	2475.95	88.41	2817.55	33.6533	2817.55	33.6533	87.8759	Gehrels et al. (2011)
Watahomigi	UA	Watahomigi-95	738.271	0.268286	2897.51	26.8394	2894.12	25.6316	2894.12	25.6316	100.117	Gehrels et al. (2011)
Watahomigi	UA	Watahomigi-60	23.7541	2.04422	2409.63	113.405	2906.42	31.3271	2906.42	31.3271	82.9074	Gehrels et al. (2011)
Manacacha	UA	Manacacha-46	148.913	0.458806	409.117	3.96406	340.171	127.101	409.117	3.96406	120.268	Gehrels et al. (2011)
Manacacha	UA	Manacacha-77	170.767	0.653084	446.063	4.30981	380.727	77.2671	446.063	4.30981	117.161	Gehrels et al. (2011)
Manacacha	UA	Manacacha-88	144.982	0.355092	1000.26	16.1215	979.215	47.9477	979.215	47.9477	102.149	Gehrels et al. (2011)
Manacacha	UA	Manacacha-18	179.252	0.695237	969.068	15.2957	995.615	41.9018	995.615	41.9018	97.3336	Gehrels et al. (2011)
Manacacha	UA	Manacacha-5	71.0019	0.535059	1016.5	21.3475	1011.54	27.3661	1011.54	27.3661	100.491	Gehrels et al. (2011)
Manacacha	UA	Manacacha-89	121.627	0.377031	1026.91	10.2524	1022.36	53.5572	1022.36	53.5572	100.445	Gehrels et al. (2011)
Manacacha	UA	Manacacha-23	204.223	0.461252	1023.14	9.46076	1023	37.6943	1023	37.6943	100.013	Gehrels et al. (2011)
Manacacha	UA	Manacacha-41	15.1028	0.198223	1020.53	15.0072	1024.31	37.2269	1024.31	37.2269	99.6304	Gehrels et al. (2011)
Manacacha	UA	Manacacha-16	17.553	0.335819	1042.03	10.4888	1029.75	49.511	1029.75	49.511	101.192	Gehrels et al. (2011)
Manacacha	UA	Manacacha-67	182.374	0.399599	1040.22	44.1896	1033.72	37.8779	1033.72	37.8779	100.628	Gehrels et al. (2011)
Manacacha	UA	Manacacha-19	356.094	0.311911	1027.71	9.49977	1043.27	20.2163	1043.27	20.2163	98.509	Gehrels et al. (2011)
Manacacha	UA	Manacacha-62	312.374	0.412681	1060.92	31.4987	1057.37	42.1255	1057.37	42.1255	100.335	Gehrels et al. (2011)
Manacacha	UA	Manacacha-35	704.771	0.104977	1012.37	12.5542	1059.09	46.495	1059.09	46.495	95.5881	Gehrels et al. (2011)
Manacacha	UA	Manacacha-28	68.8463	0.72912	1037.89	22.2408	1061.55	22.565	1061.55	22.565	97.7709	Gehrels et al. (2011)
Manacacha	UA	Manacacha-91	58.8832	0.478753	1118.01	10.2644	1074.1	69.0482	1074.1	69.0482	104.088	Gehrels et al. (2011)
Manacacha	UA	Manacacha-32	42.1084	0.770479	1078.17	9.92857	1082.67	25.3707	1082.67	25.3707	99.5847	Gehrels et al. (2011)
Manacacha	UA	Manacacha-56	42.3896	0.406773	1035.61	9.56718	1089.07	28.3727	1089.07	28.3727	95.0916	Gehrels et al. (2011)
Manacacha	UA	Manacacha-3	130.034	0.594127	1064.49	17.3681	1093.81	41.1063	1093.81	41.1063	97.3193	Gehrels et al. (2011)
Manacacha	UA	Manacacha-75	23.3642	0.475143	961.297	10.5381	1096.87	32.8865	1096.87	32.8865	87.6397	Gehrels et al. (2011)
Manacacha	UA	Manacacha-93	44.9353	0.923233	1105.62	17.577	1101.2	40.3986	1101.2	40.3986	100.401	Gehrels et al. (2011)
Manacacha	UA	Manacacha-79	157.119	0.464774	1130.92	10.3728	1110.47	36.1221	1110.47	36.1221	101.842	Gehrels et al. (2011)
Manacacha	UA	Manacacha-52	300.369	0.339027	1086.8	10.0013	1130.98	56.1859	1130.98	56.1859	96.0936	Gehrels et al. (2011)
Manacacha	UA	Manacacha-80	59.3955	0.453795	1168.71	10.6891	1160.94	49.4692	1160.94	49.4692	100.669	Gehrels et al. (2011)
Manacacha	UA	Manacacha-13	652.982	0.261577	1168.25	15.4933	1168.74	29.7107	1168.74	29.7107	99.9573	Gehrels et al. (2011)
Manacacha	UA	Manacacha-96	415.574	0.479648	1181.89	10.7988	1180.62	58.5321	1180.62	58.5321	100.108	Gehrels et al. (2011)
Manacacha	UA	Manacacha-11	320.56	0.248028	1169.46	10.6952	1188.66	19.8193	1188.66	19.8193	98.3848	Gehrels et al. (2011)
Manacacha	UA	Manacacha-50	135.229	0.392653	1149.23	10.5262	1193.72	43.9658	1193.72	43.9658	96.273	Gehrels et al. (2011)
Manacacha	UA	Manacacha-9	420.589	0.447272	1195.46	18.9863	1196.12	36.5057	1196.12	36.5057	99.9454	Gehrels et al. (2011)
Manacacha	UA	Manacacha-85	56.878	0.179808	1245.62	26.9576	1227.3	58.0599	1227.3	58.0599	101.492	Gehrels et al. (2011)
Manacacha	UA	Manacacha-39	661.123	0.281348	1227.8	11.7386	1264.45	36.144	1264.45	36.144	97.1017	Gehrels et al. (2011)
Manacacha	UA	Manacacha-42	52.9	0.263659	1211.13	26.0584	1291.73	50.7619	1291.73	50.7619	93.7609	Gehrels et al. (2011)
Manacacha	UA	Manacacha-100	207.072	0.505363	1215.46	13.293	1296.62	48.2515	1296.62	48.2515	93.7404	Gehrels et al. (2011)
Manacacha	UA	Manacacha-61	496.135	0.392954	1366.04	15.2646	1335.48	45.0668	1335.48	45.0668	102.289	Gehrels et al. (2011)
Manacacha	UA	Manacacha-26	156.611	0.353862	1333.28	12.0444	1354.86	31.1255	1354.86	31.1255	98.407	Gehrels et al. (2011)
Manacacha	UA	Manacacha-66	460.298	0.348041	1348.39	50.3729	1362.75	25.4538	1362.75	25.4538	98.9462	Gehrels et al. (2011)
Manacacha	UA	Manacacha-84	276.661	0.39053	1458.45	13.0524	1467.86	38.1781	1467.86	38.1781	99.3589	Gehrels et al. (2011)
Manacacha	UA	Manacacha-4	58.8313	0.336483	1506.98	13.4381	1475.26	51.1638	1475.26	51.1638	102.15	Gehrels et al. (2011)
Manacacha	UA	Manacacha-47	288.533	0.281591	1372.12	12.3592	1478.23	53.1137	1478.23	53.1137	92.8214	Gehrels et al. (2011)
Manacacha	UA	Manacacha-12	121.733	0.343153	1504.47	13.4181	1505.63	19.7459	1505.63	19.7459	99.9229	Gehrels et al. (2011)
Manacacha	UA	Manacacha-65	171.04	0.40351	1512.98	28.9938	1506.61	42.9257	1506.61	42.9257	100.423	Gehrels et al. (2011)
Manacacha	UA	Manacacha-15	326.21	0.427492	1467.05	13.1209	1517.8	18.9094	1517.8	18.9094	96.6564	Gehrels et al. (2011)
Manacacha	UA	Manacacha-63	151.457	0.386634	1532.8	39.835	1527.7	45.2298	1527.7	45.2298	100.334	Gehrels et al. (2011)
Manacacha	UA	Manacacha-59	231.523	0.255806	1486.32	13.2742	1530.96	31.8563	1530.96	31.8563	97.0847	Gehrels et al. (2011)
Manacacha	UA	Manacacha-69	131.008	0.518503	1548.02	16.239	1543.63	19.4408	1543.63	19.4408	100.284	Gehrels et al. (2011)
Manacacha	UA	Manacacha-10	195.962	0.980579	1487.09	15.0068	1582.84	19.3106	1582.84	19.3106	93.9509	Gehrels et al. (2011)
Manacacha	UA	Manacacha-27	36.1369	0.430275	1598.24	14.1556	1599.1	28.9528	1599.1	28.9528	99.9461	Gehrels et al. (2011)
Manacacha	UA	Manacacha-95	194.952	0.31408	1647.65	19.7736	1618.67	35.3813	1618.67	35.3813	101.79	Gehrels et al. (2011)
Manacacha	UA	Manacacha-29	90.1884	0.455198	1622.15	14.3416	1621.79	18.6897	1621.79	18.6897	100.022	Gehrels et al. (2011)
Manacacha	UA	Manacacha-2	127.423	0.829771	1573.65	44.5425	1626.9	40.5949	1626.9	40.5949	96.7265	Gehrels et al. (2011)
Manacacha	UA	Manacacha-6	370.876	0.267379	1562.63	17.6232	1628.26	28.6345	1628.26	28.6345	95.9689	Gehrels et al. (2011)
Manacacha	UA	Manacacha-49	153.304	0.988967	1575.69	13.979	1628.51	25.7208	1628.51	25.7208	96.7568	Gehrels et al. (2011)
Manacacha	UA	Manacacha-38	287.087	0.332967	1600.73	24.2388	1634.44	36.2363	1634.44	36.2363	97.9375	Gehrels et al. (2011)
Manacacha	UA	Manacacha-8	166.921	0.193949	1562.73	20.261	1641.72	27.6842	1641.72	27.6842	95.1884	Gehrels et al. (2011)
Manacacha	UA	Manacacha-14	70.5333	0.564607	1570.21	13.9361	1641.72	20.1439	1641.72	20.1439	95.6441	Gehrels et al. (2011)
Manacacha	UA	Manacacha-99	111	0.687157	1636	23.6966	1650.96	56.3834	1650.96	56.3834	99.0939	Gehrels et al. (2011)
Manacacha	UA	Manacacha-17	149.729	0.626178	1652.85	14.5797	1662.32	29.8697	1662.32	29.8697	99.4306	Gehrels et al. (2011)
Manacacha	UA	Manacacha-48	526.121	0.390903	1578.51	28.1423	1662.89	55.9111	1662.89	55.9111	94.9257	Gehrels et al. (2011)
Manacacha	UA	Manacacha-21	105.987	0.966279	1617.08	15.0172	1663.55	27.6109	1663.55	27.6109	97.2063	Gehrels et al. (2011)
Manacacha	UA	Manacacha-92	230.065	1.25716	1628.33	21.2966	1663.65	47.0277	1663.65	47.0277	97.877	Gehrels et al. (2011)
Manacacha	UA	Manacacha-53	116.873	0.547453	1598.39	15.5721	1665.63	35.7702	1665.63	35.7702	95.9632	Gehrels et al. (2011)
Manacacha	UA	Manacacha-71	498.211	1.92281	1677.59	14.7707	1666.64	53.8491	1666.64	53.8491	100.657	Gehrels et al. (2011)
Manacacha	UA	Manacacha-36	266.856	0.298812	1670.15	14.7133	1667.3	53.8455	1667.3	53.8455	100.171	Gehrels et al. (2011)
Manacacha	UA	Manacacha-60	206.7	0.739107	1561.13	13.8648	1668.32	40.3402	1668.32	40.3402	93.5749	Gehrels et al. (2011)
Manacacha	UA	Manacacha-40	144.588	0.674767	1645.42	14.5221	1669.46	26.5105	1669.46	26.5105	98.5597	Gehrels et al. (2011)
Manacacha	UA	Manacacha-7	164.591	0.528042	1636.45	14.4526	1683.33	22.956	1683.33	22.956	97.2148	Gehrels et al. (2011)
Manacacha	UA	Manacacha-37	157.374	0.3694	1620.5	35.3922	1688.13	40.9758	1688.13	40.9758	95.9942	Gehrels et al. (2011)
Manacacha	UA	Manacacha-54	75.514	0.865115	1633.42	14.5734	1693.66	20.2316	1693.66	20.2316	96.443	Gehrels et al. (2011)
Manacacha	UA	Manacacha-72	118.747	0.613573	1691.09	14.8747	1697.95	28.3865	1697.95	28.3865	99.5955	Gehrels et al. (2011)
Manacacha	UA	Manacacha-51	315.151	0.4584	1621.63	26.9546	1710.73	48.21	1710.73	48.21	94.7916	Gehrels et al. (2011)
Manacacha	UA	Manacacha-55	127.758	0.4712	1698.36	16.125	1711.89	44.5279	1711.89	44.5279	99.2097	Gehrels et al. (2011)
Manacacha	UA	Manacacha-68	564.019	0.535992	1722.55	50.3375	1736.67	30.8118	1736.67	30.8118	99.1868	Gehrels et al. (2011)
Manacacha	UA	Manacacha-86	265.443	0.780389	1755.38	16.9034	1742.81	50.3999	1742.81	50.3999	100.721	Gehrels et al. (2011)
Manacacha	UA	Manacacha-73	134.877	0.295353	1749.59	36.3151	1755.52	41.7316	1755.52	41.7316	99.6622	Gehrels et al. (2011)
Manacacha	UA	Manacacha-20	210.582	0.50011	1728.6	15.1624	1768.93	25.2286	1768.93	25.2286	97.7203	Gehrels et al. (2011)
Manacacha	UA	Manacacha-98	206.877	0.55336	1744.41	17.7285	1771.37	48.5735	1771.37	48.5735	98.4778	Gehrels et al. (2011)
Manacacha	UA	Manacacha-33	54.2657	0.387459	1744.34	40.0411	1788.2	40.9889	1788.2	40.9889	97.5474	Gehrels et al. (2011)
Manacacha	UA	Manacacha-43	76.5048	0.607596	1723.78	15.1256	1796.41	21.0069	1796.41	21.0069	95.957	Gehrels et al. (2011)
Manacacha	UA	Manacacha-25	185.143	0.513799	1765.12	15.441	1797.54	18.2282	1797.54	18.2282	98.1969	Gehrels et al. (2011)
Manacacha	UA	Manacacha-64	80.6486	0.267325	1810.35	22.255	1800.39	41.5298	1800.39	41.5298	100.553	Gehrels et al. (2011)
Manacacha	UA	Manacacha-90	86.0988	0.4554	1817.02	26.1262	1807.32	34.1993	1807.32	34.1993	100.537	Gehrels et al. (2011)
Manacacha	UA	Manacacha-82	493.935	0.38325	1780.01	16.3317	1808.36	19.2669	1808.36	19.2669	98.4323	Gehrels et al. (2011)
Manacacha	UA	Manacacha-1	227.921	0.412783	1755.03	21.0489	1813.22	24.3471	1813.22	24.3471	96.791	Gehrels et al. (2011)
Manacacha	UA	Manacacha-81	46.7992	1.48778	1867.08	37.9323	1829.11	49.146	1829.11	49.146	102.076	Gehrels et al. (2011)
Manacacha	UA	Manacacha-24	122.268	0.347344	1889.23	16.3757	1892.27	18.3755	1892.27	18.3755	99.8394	Gehrels et al. (2011)
Manacacha	UA	Manacacha-97	113.791	0.810768	1911.12	22.6581	1970.66	46.0204	1970.66	46.0204	96.9782	Gehrels et al. (2011)
Manacacha	UA	Manacacha-58	99.2795	0.425436	2276.56	19.1801	2316.14	38.2658	2316.14	38.2658	98.2912	Gehrels et al. (2011)
Manacacha	UA	Manacacha-44	390.263	0.330331	2486.17	31.7685	2600.22	34.0079	2600.22	34.0079	95.6138	Gehrels et al. (2011)
Manacacha	UA	Manacacha-31	28.5588	0.611085	2626.71	22.2231	2620.68	38.3813	2620.68	38.3813	100.23	Gehrels et al. (2011)
Manacacha	UA	Manacacha-83	402.669	0.0745153	2559.7	21.126	2630.6	26.7587	2630.6	26.7587	97.3048	Gehrels et al. (2011)
Manacacha	UA	Manacacha-30	40.8633	1.55043	2570.96	21.2019	2684.88	16.5795	2684.88	16.5795	95.7569	Gehrels et al. (2011)
Manacacha	UA	Manacacha-76	40.7925	1.21271	2668.46	21.8512	2715.88	32.8235	2715.88	32.8235	98.2543	Gehrels et al. (2011)
Manacacha	UA	Manacacha-78	163.179	0.717924	2698.55	23.3725	2722.74	23.0676	2722.74	23.0676	99.1117	Gehrels et al. (2011)
Manacacha	UA	Manacacha-74	98.7835	0.881345	2646.06	39.4993	2736.57	27.8164	2736.57	27.8164	96.6925	Gehrels et al. (2011)
Manacacha	UA	Manacacha-34	280.232	0.418792	2739.08	22.3153	2745.25	44.5635	2745.25	44.5635	99.7753	Gehrels et al. (2011)
Manacacha	UA	Manacacha-57	66.3559	0.292031	2750.1	22.3874	2754.42	32.0429	2754.42	32.0429	99.8432	Gehrels et al. (2011)
Manacacha	UA	Manacacha-45	300.115	0.824083	2639.87	34.8754	2764.38	30.5314	2764.38	30.5314	95.4957	Gehrels et al. (2011)
Manacacha	UA	Manacacha-70	72.5837	0.762228	2787.33	44.1283	2804.09	21.5947	2804.09	21.5947	99.4023	Gehrels et al. (2011)
Manacacha	UA	Manacacha-94	192.77	0.801276	2846.08	52.4618	2880.96	37.5191	2880.96	37.5191	98.7895	Gehrels et al. (2011)
Manacacha	UA	Manacacha-87	68.5734	0.732715	2924.58	23.5109	2933.71	35.4113	2933.71	35.4113	99.6887	Gehrels et al. (2011)
Manacacha	UA	Manacacha-22	39.5779	0.346543	2990.9	23.9307	3000.59	40.6892	3000.59	40.6892	99.677	Gehrels et al. (2011)
Wescogame	UA	06GC147-95	448.618	0.839016	451.643	8.76732	450.564	37.3796	451.643	8.76732	100.24	Gehrels et al. (2011)
Wescogame	UA	06GC147-35	170.395	0.397522	464.05	2.28354	365.563	108.949	464.05	2.28354	126.941	Gehrels et al. (2011)
Wescogame	UA	06GC147-58	153.21	2.62457	653.107	14.2235	657.454	79.4832	653.107	14.2235	99.3389	Gehrels et al. (2011)
Wescogame	UA	06GC147-44	265.724	0.582287	665.941	13.9827	669.484	61.3005	665.941	13.9827	99.4708	Gehrels et al. (2011)
Wescogame	UA	06GC147-73	137.906	0.971942	870.114	20.593	964.877	45.3288	870.114	20.593	90.1788	Gehrels et al. (2011)
Wescogame	UA	06GC147-17	49.4684	0.929641	884.126	21.7287	915.75	62.682	884.126	21.7287	96.5467	Gehrels et al. (2011)
Wescogame	UA	06GC147-47	499.096	0.242763	972.955	12.9142	954.959	26.785	954.959	26.785	101.884	Gehrels et al. (2011)
Wescogame	UA	06GC147-81	57.8984	0.473441	987.469	16.9384	989.301	50.4434	989.301	50.4434	99.8148	Gehrels et al. (2011)
Wescogame	UA	06GC147-54	611.832	1.02249	1035.29	28.9801	1024.79	26.8273	1024.79	26.8273	101.024	Gehrels et al. (2011)
Wescogame	UA	06GC147-94	85.4796	0.54374	1067.59	26.4665	1078.18	72.4125	1078.18	72.4125	99.0184	Gehrels et al. (2011)
Wescogame	UA	06GC147-87	16.005	0.65818	1088.05	23.0278	1095.34	63.55	1095.34	63.55	99.3341	Gehrels et al. (2011)
Wescogame	UA	06GC147-24	285.388	0.802532	1057.35	11.6047	1096.01	49.3391	1096.01	49.3391	96.4721	Gehrels et al. (2011)
Wescogame	UA	06GC147-61	42.5603	0.831249	1090.15	10.5317	1099.24	51.7119	1099.24	51.7119	99.173	Gehrels et al. (2011)
Wescogame	UA	06GC147-59	699.107	0.557301	1014.56	25.6281	1100.4	43.4221	1100.4	43.4221	92.1997	Gehrels et al. (2011)
Wescogame	UA	06GC147-59	803.242	0.206731	1120.21	19.4346	1109.52	44.8082	1109.52	44.8082	100.963	Gehrels et al. (2011)
Wescogame	UA	06GC147-84	58.3771	0.634486	1121.51	23.0586	1109.78	48.3103	1109.78	48.3103	101.056	Gehrels et al. (2011)
Wescogame	UA	06GC147-9	370.526	0.446937	1086.92	11.4026	1123.11	60.4771	1123.11	60.4771	96.7774	Gehrels et al. (2011)
Wescogame	UA	06GC147-35	124.5	0.78061	1101.67	21.9753	1137.14	29.5535	1137.14	29.5535	96.8807	Gehrels et al. (2011)
Wescogame	UA	06GC147-33	221.214	0.527572	1129.41	20.0986	1139.14	25.8391	1139.14	25.8391	99.1457	Gehrels et al. (2011)
Wescogame	UA	06GC147-68	132.281	0.331955	1143.06	23.5678	1144.46	37.6868	1144.46	37.6868	99.8777	Gehrels et al. (2011)
Wescogame	UA	06GC147-28	67.2517	0.903896	1124.25	24.3481	1147.87	40.2181	1147.87	40.2181	97.9426	Gehrels et al. (2011)
Wescogame	UA	06GC147-21	60.8053	0.881745	1130.86	8.9205	1156.1	30.8015	1156.1	30.8015	97.8169	Gehrels et al. (2011)
Wescogame	UA	06GC147-67	84.1288	0.920485	1151.81	20.1463	1158.79	40.9014	1158.79	40.9014	99.3974	Gehrels et al. (2011)
Wescogame	UA	06GC147-27	141.189	0.814829	1173.98	19.2119	1177.38	49.8391	1177.38	49.8391	99.7114	Gehrels et al. (2011)
Wescogame	UA	06GC147-98	252.352	0.958763	1171.14	20.6687	1178.91	41.6886	1178.91	41.6886	99.3406	Gehrels et al. (2011)
Wescogame	UA	06GC147-41	924.681	0.536373	1176.77	13.6603	1193.36	23.3933	1193.36	23.3933	98.6104	Gehrels et al. (2011)
Wescogame	UA	06GC147-12	75.7501	0.408721	1111.9	19.7114	1193.71	57.6956	1193.71	57.6956	93.146	Gehrels et al. (2011)
Wescogame	UA	06GC147-64	191.325	0.446985	1223.74	5.57336	1200.6	50.7961	1200.6	50.7961	101.927	Gehrels et al. (2011)
Wescogame	UA	06GC147-13	64.9091	1.03482	1209.52	15.4402	1207.27	52.4414	1207.27	52.4414	100.187	Gehrels et al. (2011)
Wescogame	UA	06GC147-38	655.332	0.325236	1194.82	11.3425	1210.34	17.5701	1210.34	17.5701	98.7172	Gehrels et al. (2011)
Wescogame	UA	06GC147-3	142.01	0.405193	1227.96	5.59095	1264.86	48.8488	1264.86	48.8488	97.0827	Gehrels et al. (2011)
Wescogame	UA	06GC147-76	174.653	0.360376	1268.04	24.634	1267.41	36.4473	1267.41	36.4473	100.049	Gehrels et al. (2011)
Wescogame	UA	06GC147-25	153.176	0.412383	1302.63	19.8149	1286.19	42.278	1286.19	42.278	101.278	Gehrels et al. (2011)
Wescogame	UA	06GC147-50	276	0.712591	1354.36	13.8035	1359.13	33.9977	1359.13	33.9977	99.6489	Gehrels et al. (2011)
Wescogame	UA	06GC147-96	616.38	0.710874	1390.97	41.1629	1370.1	50.3836	1370.1	50.3836	101.523	Gehrels et al. (2011)
Wescogame	UA	06GC147-29	71.2701	0.466729	1397.12	10.6776	1380.54	31.402	1380.54	31.402	101.2	Gehrels et al. (2011)
Wescogame	UA	06GC147-45	228.31	0.264269	1393.8	11.1556	1387.11	56.6705	1387.11	56.6705	100.483	Gehrels et al. (2011)
Wescogame	UA	06GC147-75	270.631	0.403056	1410.15	23.0517	1402.33	45.8713	1402.33	45.8713	100.557	Gehrels et al. (2011)
Wescogame	UA	06GC147-11	209.877	0.8243	1411.19	16.9833	1414.14	47.4215	1414.14	47.4215	99.7912	Gehrels et al. (2011)
Wescogame	UA	06GC147-51	112.001	1.11449	1382.71	29.8681	1421.01	44.835	1421.01	44.835	97.3043	Gehrels et al. (2011)
Wescogame	UA	06GC147-77	175.012	0.325766	1402.85	19.7931	1444.28	36.9076	1444.28	36.9076	97.1314	Gehrels et al. (2011)
Wescogame	UA	06GC147-43	292.724	0.450672	1431.9	19.0036	1475.21	23.4854	1475.21	23.4854	97.0644	Gehrels et al. (2011)
Wescogame	UA	06GC147-74	277.916	0.362739	1395.9	34.3903	1494.43	29.5068	1494.43	29.5068	93.4069	Gehrels et al. (2011)
Wescogame	UA	06GC147-48	151.175	0.346161	1535.69	27.603	1540.3	31.457	1540.3	31.457	99.7011	Gehrels et al. (2011)
Wescogame	UA	06GC147-20	145.293	0.752574	1556.68	21.298	1547.27	32.0867	1547.27	32.0867	100.608	Gehrels et al. (2011)
Wescogame	UA	06GC147-46	233.474	0.425802	1573.24	18.2875	1550.31	37.4882	1550.31	37.4882	101.479	Gehrels et al. (2011)
Wescogame	UA	06GC147-39	351.374	0.234036	1572.51	19.117	1556.18	17.8884	1556.18	17.8884	101.049	Gehrels et al. (2011)
Wescogame	UA	06GC147-89	145.088	0.614934	1586	24.6046	1560.03	30.3389	1560.03	30.3389	101.664	Gehrels et al. (2011)
Wescogame	UA	06GC147-5	85.7361	0.490588	1462.62	25.5174	1562.78	34.437	1562.78	34.437	93.5911	Gehrels et al. (2011)
Wescogame	UA	06GC147-72	234.09	0.239519	1638.74	14.9045	1620.79	35.8704	1620.79	35.8704	101.108	Gehrels et al. (2011)
Wescogame	UA	06GC147-79	133.392	0.256728	1634.19	26.5606	1625.24	37.7529	1625.24	37.7529	100.55	Gehrels et al. (2011)
Wescogame	UA	06GC147-93	363.669	0.620441	1657.75	29.3814	1642.83	48.6511	1642.83	48.6511	100.908	Gehrels et al. (2011)
Wescogame	UA	06GC147-16	353.101	0.38163	1630.54	7.20336	1643.93	22.1169	1643.93	22.1169	99.1854	Gehrels et al. (2011)
Wescogame	UA	06GC147-82	130.194	0.721239	1673.54	22.699	1653.42	54.6611	1653.42	54.6611	101.217	Gehrels et al. (2011)
Wescogame	UA	06GC147-36	169.694	0.538894	1650.89	36.8486	1662.34	49.6636	1662.34	49.6636	99.311	Gehrels et al. (2011)
Wescogame	UA	06GC147-49	256.952	1.42607	1624.8	24.9902	1666.77	53.7321	1666.77	53.7321	97.4819	Gehrels et al. (2011)
Wescogame	UA	06GC147-86	18.8777	0.25801	1699.74	20.1818	1675.21	63.1744	1675.21	63.1744	101.465	Gehrels et al. (2011)
Wescogame	UA	06GC147-55	344.022	0.591779	1687.57	24.2017	1676.06	25.5215	1676.06	25.5215	100.687	Gehrels et al. (2011)
Wescogame	UA	06GC147-40	186.862	0.717709	1700.41	14.6474	1685.05	39.3779	1685.05	39.3779	100.911	Gehrels et al. (2011)
Wescogame	UA	06GC147-66	204.32	0.221382	1696.47	18.6451	1691.66	46.1919	1691.66	46.1919	100.285	Gehrels et al. (2011)
Wescogame	UA	06GC147-32	123.662	1.48967	1706.29	7.4959	1705.64	39.8611	1705.64	39.8611	100.038	Gehrels et al. (2011)
Wescogame	UA	06GC147-18	146.182	0.550408	1649.38	36.9646	1707.4	52.3035	1707.4	52.3035	96.6022	Gehrels et al. (2011)
Wescogame	UA	06GC147-8	40.7477	0.387319	1636.07	15.6079	1707.84	38.8498	1707.84	38.8498	95.7975	Gehrels et al. (2011)
Wescogame	UA	06GC147-100	125.355	0.977089	1720.49	40.4695	1711.02	35.0325	1711.02	35.0325	100.554	Gehrels et al. (2011)
Wescogame	UA	06GC147-83	111.83	0.474705	1728.5	27.898	1715.08	39.3527	1715.08	39.3527	100.782	Gehrels et al. (2011)
Wescogame	UA	06GC147-99	71.612	1.19578	1727.84	36.9833	1725.36	20.0628	1725.36	20.0628	100.144	Gehrels et al. (2011)
Wescogame	UA	06GC147-62	290.774	0.335531	1663.39	7.47732	1749.78	37.6197	1749.78	37.6197	95.0626	Gehrels et al. (2011)
Wescogame	UA	06GC147-85	641.961	0.561329	1654.62	37.6512	1758.36	29.3186	1758.36	29.3186	94.1005	Gehrels et al. (2011)
Wescogame	UA	06GC147-15	249.24	0.295856	1791.31	29.7156	1761.12	34.9905	1761.12	34.9905	101.714	Gehrels et al. (2011)
Wescogame	UA	06GC147-88	257.533	0.412266	1742.52	32.3699	1761.8	41.5164	1761.8	41.5164	98.9053	Gehrels et al. (2011)
Wescogame	UA	06GC147-42	327.179	0.629052	1787.86	27.6361	1771.3	20.8653	1771.3	20.8653	100.935	Gehrels et al. (2011)
Wescogame	UA	06GC147-78	365.396	0.33934	1794.02	24.8998	1783.48	41.7759	1783.48	41.7759	100.591	Gehrels et al. (2011)
Wescogame	UA	06GC147-71	112.274	0.957085	1789.67	20.003	1794.94	36.9513	1794.94	36.9513	99.7065	Gehrels et al. (2011)
Wescogame	UA	06GC147-63	150.936	0.368723	1849.88	8.04101	1826.35	51.4346	1826.35	51.4346	101.288	Gehrels et al. (2011)
Wescogame	UA	06GC147-1	125.595	1.11051	1862.15	20.8636	1831.47	35.0161	1831.47	35.0161	101.676	Gehrels et al. (2011)
Wescogame	UA	06GC147-91	637.72	0.349671	1765.15	37.5224	1852.74	54.9983	1852.74	54.9983	95.2724	Gehrels et al. (2011)
Wescogame	UA	06GC147-22	347.493	0.154725	1830.62	39.2043	1860.64	49.6799	1860.64	49.6799	98.3869	Gehrels et al. (2011)
Wescogame	UA	06GC147-53	285.662	0.548652	1888.26	36.3384	1870.93	43.343	1870.93	43.343	100.927	Gehrels et al. (2011)
Wescogame	UA	06GC147-19	183.989	0.68069	1891.87	23.4456	1890.84	53.7355	1890.84	53.7355	100.054	Gehrels et al. (2011)
Wescogame	UA	06GC147-56	185.75	0.225626	1884.71	8.33452	1894.98	50.9368	1894.98	50.9368	99.4584	Gehrels et al. (2011)
Wescogame	UA	06GC147-70	259.209	0.371875	1896.17	8.21374	1900.01	35.6077	1900.01	35.6077	99.7978	Gehrels et al. (2011)
Wescogame	UA	06GC147-7	98.4067	0.463104	1942.96	8.38774	1922.57	27.5571	1922.57	27.5571	101.06	Gehrels et al. (2011)
Wescogame	UA	06GC147-10	527.121	0.301985	1892.8	22.4713	1922.88	43.9522	1922.88	43.9522	98.4359	Gehrels et al. (2011)
Wescogame	UA	06GC147-30	333.865	0.650608	1988.22	15.7399	1978.35	26.7642	1978.35	26.7642	100.499	Gehrels et al. (2011)
Wescogame	UA	06GC147-4	124.757	0.444583	2006.98	8.62352	1994.69	40.1002	1994.69	40.1002	100.617	Gehrels et al. (2011)
Wescogame	UA	06GC147-97	133.648	1.59533	2032.62	42.1897	2013.86	21.3794	2013.86	21.3794	100.931	Gehrels et al. (2011)
Wescogame	UA	06GC147-14	361.258	0.605664	2007.74	29.6731	2014.22	36.4	2014.22	36.4	99.6782	Gehrels et al. (2011)
Wescogame	UA	06GC147-69	254.353	0.122614	2064.84	8.83424	2083.92	24.3408	2083.92	24.3408	99.0847	Gehrels et al. (2011)
Wescogame	UA	06GC147-23	230.841	0.809142	2080.61	52.4593	2145.32	40.5621	2145.32	40.5621	96.9839	Gehrels et al. (2011)
Wescogame	UA	06GC147-25	85.2573	2.06992	2226.11	50.8266	2202.79	43.3577	2202.79	43.3577	101.059	Gehrels et al. (2011)
Wescogame	UA	06GC147-2	36.7636	0.677832	2209.51	39.8467	2237.62	37.8685	2237.62	37.8685	98.7439	Gehrels et al. (2011)
Wescogame	UA	06GC147-6	142.352	0.853794	2368.09	34.8807	2538.28	53.1804	2538.28	53.1804	93.2951	Gehrels et al. (2011)
Wescogame	UA	06GC147-80	109.555	0.604493	2623	28.4462	2596.17	54.0929	2596.17	54.0929	101.034	Gehrels et al. (2011)
Wescogame	UA	06GC147-90	490.768	0.179411	2486.77	71.3925	2622.8	35.9339	2622.8	35.9339	94.8137	Gehrels et al. (2011)
Wescogame	UA	06GC147-65	96.4232	0.519228	2626.66	58.898	2626.58	36.271	2626.58	36.271	100.003	Gehrels et al. (2011)
Wescogame	UA	06GC147-52	700.799	0.509621	2466.87	37.5104	2679.52	50.1364	2679.52	50.1364	92.0636	Gehrels et al. (2011)
Wescogame	UA	06GC147-34	77.1693	1.20801	2832.19	59.1349	2825.12	21.1514	2825.12	21.1514	100.25	Gehrels et al. (2011)
Wescogame	UA	06GC147-37	239.528	0.508831	2935.23	36.5469	2907.22	63.2312	2907.22	63.2312	100.963	Gehrels et al. (2011)
Wescogame	UA	06GC147-92	229.935	0.196391	2988.12	43.5213	2962.93	48.0726	2962.93	48.0726	100.85	Gehrels et al. (2011)
Wescogame	UA	06GC147-57	126.621	0.127625	2965.17	68.9294	2978.93	16.1018	2978.93	16.1018	99.5381	Gehrels et al. (2011)
Esplanade 1	UA	Esplanade-54	302.877	0.538101	332.908	8.76038	335.691	151.773	332.908	8.76038	99.1709	Gehrels et al. (2011)
Esplanade 1	UA	Esplanade-38	113.146	0.0115026	411.31	3.98463	420.071	213.92	411.31	3.98463	97.9142	Gehrels et al. (2011)
Esplanade 1	UA	Esplanade-8	160.648	0.0120214	412.459	9.62893	538.074	183.743	412.459	9.62893	76.6547	Gehrels et al. (2011)
Esplanade 1	UA	Esplanade-88	386.214	0.813325	412.598	10.8311	406.874	74.9953	412.598	10.8311	101.407	Gehrels et al. (2011)
Esplanade 1	UA	Esplanade-97	199.304	1.11623	429.079	5.77004	321.502	144.692	429.079	5.77004	133.461	Gehrels et al. (2011)
Esplanade 1	UA	Esplanade-83	180.222	0.751272	433.014	16.291	278.566	218.449	433.014	16.291	155.444	Gehrels et al. (2011)
Esplanade 1	UA	Esplanade-2	456.174	1.18999	434.008	4.19721	512.112	52.9882	434.008	4.19721	84.7487	Gehrels et al. (2011)
Esplanade 1	UA	Esplanade-95	303.091	0.725274	1029.33	10.0843	1030.04	57.8387	1030.04	57.8387	99.9306	Gehrels et al. (2011)
Esplanade 1	UA	Esplanade-37	129.044	0.405372	1038.02	9.58763	1041.08	46.137	1041.08	46.137	99.7065	Gehrels et al. (2011)
Esplanade 1	UA	Esplanade-53	155.05	0.346317	1015.61	18.1352	1056.21	59.0201	1056.21	59.0201	96.1561	Gehrels et al. (2011)
Esplanade 1	UA	Esplanade-46	252.405	0.905349	1015.19	11.2714	1067.26	35.8333	1067.26	35.8333	95.1207	Gehrels et al. (2011)
Esplanade 1	UA	Esplanade-68	298.026	0.384295	1039.67	25.2523	1067.75	39.8158	1067.75	39.8158	97.3702	Gehrels et al. (2011)
Esplanade 1	UA	Esplanade-70	385.53	0.422085	1048.06	10.5436	1081.18	61.0064	1081.18	61.0064	96.9371	Gehrels et al. (2011)
Esplanade 1	UA	Esplanade-26	595.753	0.324447	1024.57	15.9147	1084.53	23.4687	1084.53	23.4687	94.4719	Gehrels et al. (2011)
Esplanade 1	UA	Esplanade-62	729.776	0.075075	1071.7	12.6381	1085.22	29.8816	1085.22	29.8816	98.7539	Gehrels et al. (2011)
Esplanade 1	UA	Esplanade-87	234.049	0.979042	1044.01	17.4458	1096.69	38.6434	1096.69	38.6434	95.1965	Gehrels et al. (2011)
Esplanade 1	UA	Esplanade-44	207.232	0.861414	1090.48	22.0712	1100.32	60.2501	1100.32	60.2501	99.1058	Gehrels et al. (2011)
Esplanade 1	UA	Esplanade-36	343.199	1.69853	1091.44	10.0405	1103.39	22.399	1103.39	22.399	98.9174	Gehrels et al. (2011)
Esplanade 1	UA	Esplanade-93	139.729	0.761671	1111.3	10.2079	1103.76	51.6278	1103.76	51.6278	100.684	Gehrels et al. (2011)
Esplanade 1	UA	Esplanade-42	78.4864	0.392088	1106.16	20.5326	1106.66	30.9763	1106.66	30.9763	99.9549	Gehrels et al. (2011)
Esplanade 1	UA	Esplanade-35	178.149	0.917671	1116.11	17.2173	1110.72	32.7683	1110.72	32.7683	100.485	Gehrels et al. (2011)
Esplanade 1	UA	Esplanade-74	87.9954	0.500484	1115.55	11.3704	1114.54	34.6147	1114.54	34.6147	100.091	Gehrels et al. (2011)
Esplanade 1	UA	Esplanade-105	102.847	0.419233	1108.6	10.1851	1130.47	37.7052	1130.47	37.7052	98.0654	Gehrels et al. (2011)
Esplanade 1	UA	Esplanade-64	334.267	0.3258	1134.22	13.2086	1131.44	32.4658	1131.44	32.4658	100.246	Gehrels et al. (2011)
Esplanade 1	UA	Esplanade-6	26.9029	0.436951	1121.91	13.2834	1133.38	60.9211	1133.38	60.9211	98.9885	Gehrels et al. (2011)
Esplanade 1	UA	Esplanade-21	259.328	0.356162	1071.8	37.9182	1138.66	28.8614	1138.66	28.8614	94.1288	Gehrels et al. (2011)
Esplanade 1	UA	Esplanade-79	316.702	1.78523	1159.33	16.2342	1157.57	27.1926	1157.57	27.1926	100.152	Gehrels et al. (2011)
Esplanade 1	UA	Esplanade-59	36.4546	0.388107	1155.11	18.8242	1172.36	35.5823	1172.36	35.5823	98.5282	Gehrels et al. (2011)
Esplanade 1	UA	Esplanade-90	164.281	0.432913	1125.08	12.0788	1187.08	24.5363	1187.08	24.5363	94.7772	Gehrels et al. (2011)
Esplanade 1	UA	Esplanade-69	921.067	0.70573	1141.28	15.5848	1200.48	43.3752	1200.48	43.3752	95.0687	Gehrels et al. (2011)
Esplanade 1	UA	Esplanade-103	38.506	0.649819	1156.23	34.6122	1204.34	62.1689	1204.34	62.1689	96.0047	Gehrels et al. (2011)
Esplanade 1	UA	Esplanade-100	100.154	0.650575	1150.96	13.9137	1206.53	43.5692	1206.53	43.5692	95.3944	Gehrels et al. (2011)
Esplanade 1	UA	Esplanade-80	311.809	0.79736	1197.61	22.0777	1208.2	21.8851	1208.2	21.8851	99.1239	Gehrels et al. (2011)
Esplanade 1	UA	Esplanade-61	204.945	0.59673	1147.11	10.5084	1238.17	22.9106	1238.17	22.9106	92.6456	Gehrels et al. (2011)
Esplanade 1	UA	Esplanade-51	773.881	0.955778	1211.94	11.0484	1292.19	53.1232	1292.19	53.1232	93.79	Gehrels et al. (2011)
Esplanade 1	UA	Esplanade-10	190.158	0.540249	1306	13.8319	1308.44	61.3596	1308.44	61.3596	99.8139	Gehrels et al. (2011)
Esplanade 1	UA	Esplanade-22	122.185	0.467987	1227.58	17.7727	1309.97	52.8104	1309.97	52.8104	93.7102	Gehrels et al. (2011)
Esplanade 1	UA	Esplanade-89	171.14	0.721224	1337.8	12.0811	1351.04	21.4324	1351.04	21.4324	99.0204	Gehrels et al. (2011)
Esplanade 1	UA	Esplanade-47	246.635	0.705066	1412.65	20.9317	1411.99	37.138	1411.99	37.138	100.047	Gehrels et al. (2011)
Esplanade 1	UA	Esplanade-55	40.7283	0.920512	1349.63	25.6939	1412.04	30.4552	1412.04	30.4552	95.58	Gehrels et al. (2011)
Esplanade 1	UA	Esplanade-29	42.6301	0.440216	1384.59	49.8407	1412.48	46.3155	1412.48	46.3155	98.0254	Gehrels et al. (2011)
Esplanade 1	UA	Esplanade-12	50.045	0.200499	1411.58	12.6773	1414.02	43.4858	1414.02	43.4858	99.8275	Gehrels et al. (2011)
Esplanade 1	UA	Esplanade-96	45.3867	0.45788	1440.46	15.7487	1427.86	51.7512	1427.86	51.7512	100.883	Gehrels et al. (2011)
Esplanade 1	UA	Esplanade-91	217.681	0.666736	1347.68	17.0259	1437.41	20.4164	1437.41	20.4164	93.7576	Gehrels et al. (2011)
Esplanade 1	UA	Esplanade-73	279.094	1.01673	1408.88	34.4233	1445.24	26.4799	1445.24	26.4799	97.4837	Gehrels et al. (2011)
Esplanade 1	UA	Esplanade-82	129.6	0.893438	1454.61	35.159	1451.12	39.6127	1451.12	39.6127	100.24	Gehrels et al. (2011)
Esplanade 1	UA	Esplanade-50	123.424	0.574858	1445.36	21.2346	1470.21	59.248	1470.21	59.248	98.3099	Gehrels et al. (2011)
Esplanade 1	UA	Esplanade-57	192.957	0.282633	1381.12	19.2695	1489.58	39.2034	1489.58	39.2034	92.7184	Gehrels et al. (2011)
Esplanade 1	UA	Esplanade-63	263.196	0.410586	1464.5	25.0222	1515.7	36.0466	1515.7	36.0466	96.6218	Gehrels et al. (2011)
Esplanade 1	UA	Esplanade-16	512.331	0.342368	1511.56	22.9063	1518.33	26.0296	1518.33	26.0296	99.5544	Gehrels et al. (2011)
Esplanade 1	UA	Esplanade-31	561.094	0.595971	1603.64	20.8702	1605.45	27.6005	1605.45	27.6005	99.8875	Gehrels et al. (2011)
Esplanade 1	UA	Esplanade-48	92.5896	1.35576	1589	29.9972	1614.36	25.711	1614.36	25.711	98.4293	Gehrels et al. (2011)
Esplanade 1	UA	Esplanade-92	330.164	0.295134	1653.42	30.4809	1630.65	53.7268	1630.65	53.7268	101.396	Gehrels et al. (2011)
Esplanade 1	UA	Esplanade-40	93.1666	0.651152	1639.48	14.4761	1632.78	36.6099	1632.78	36.6099	100.41	Gehrels et al. (2011)
Esplanade 1	UA	Esplanade-60	221.698	0.490281	1599.54	15.2986	1634.58	39.5723	1634.58	39.5723	97.8561	Gehrels et al. (2011)
Esplanade 1	UA	Esplanade-19	100.624	0.581614	1643.59	18.4251	1651.89	25.2187	1651.89	25.2187	99.4971	Gehrels et al. (2011)
Esplanade 1	UA	Esplanade-20	159.644	0.763693	1615.55	36.4403	1656.2	33.9057	1656.2	33.9057	97.5458	Gehrels et al. (2011)
Esplanade 1	UA	Esplanade-4	702.083	0.378342	1655.34	30.6578	1656.28	32.0517	1656.28	32.0517	99.9428	Gehrels et al. (2011)
Esplanade 1	UA	Esplanade-52	163.106	1.02728	1637.59	14.4614	1660.39	36.8526	1660.39	36.8526	98.6265	Gehrels et al. (2011)
Esplanade 1	UA	Esplanade-77	132.741	1.75534	1638.68	16.0615	1660.92	45.3664	1660.92	45.3664	98.6606	Gehrels et al. (2011)
Esplanade 1	UA	Esplanade-15	305.334	0.370834	1659.61	31.1661	1665.31	23.3151	1665.31	23.3151	99.6573	Gehrels et al. (2011)
Esplanade 1	UA	Esplanade-49	97.3762	0.813137	1644.28	34.2516	1679.5	24.9443	1679.5	24.9443	97.9028	Gehrels et al. (2011)
Esplanade 1	UA	Esplanade-76	129.643	0.770409	1666.63	14.6861	1679.91	46.9236	1679.91	46.9236	99.2094	Gehrels et al. (2011)
Esplanade 1	UA	Esplanade-27	370.38	0.571065	1628.27	14.3891	1681.17	18.4688	1681.17	18.4688	96.8531	Gehrels et al. (2011)
Esplanade 1	UA	Esplanade-75	187.765	0.375638	1528.76	19.3264	1692.01	30.3002	1692.01	30.3002	90.3516	Gehrels et al. (2011)
Esplanade 1	UA	Esplanade-98	123.104	0.551459	1681.91	14.804	1696.2	34.6568	1696.2	34.6568	99.158	Gehrels et al. (2011)
Esplanade 1	UA	Esplanade-78	420.275	0.405271	1625.58	14.3681	1700.5	46.7971	1700.5	46.7971	95.5938	Gehrels et al. (2011)
Esplanade 1	UA	Esplanade-11	228.322	0.833513	1687.37	35.1854	1726.27	29.3852	1726.27	29.3852	97.7462	Gehrels et al. (2011)
Esplanade 1	UA	Esplanade-65	796.959	0.335461	1448.28	15.5654	1760.32	29.079	1760.32	29.079	82.2734	Gehrels et al. (2011)
Esplanade 1	UA	Esplanade-28	394.633	0.472563	1724.45	31.9258	1762.38	29.98	1762.38	29.98	97.8474	Gehrels et al. (2011)
Esplanade 1	UA	Esplanade-72	266.807	0.529339	1736.51	21.921	1762.78	39.4859	1762.78	39.4859	98.5098	Gehrels et al. (2011)
Esplanade 1	UA	Esplanade-41	175.799	0.564078	1750.55	36.9456	1763.76	40.2103	1763.76	40.2103	99.2507	Gehrels et al. (2011)
Esplanade 1	UA	Esplanade-24	342.387	0.297841	1755.92	18.5988	1765.32	43.4938	1765.32	43.4938	99.4679	Gehrels et al. (2011)
Esplanade 1	UA	Esplanade-101	137.442	0.679955	1747.1	15.3037	1770.61	24.1143	1770.61	24.1143	98.6723	Gehrels et al. (2011)
Esplanade 1	UA	Esplanade-71	100.432	0.972746	1679.67	37.2629	1775.44	49.4697	1775.44	49.4697	94.6056	Gehrels et al. (2011)
Esplanade 1	UA	Esplanade-84	334.566	0.320991	1715.31	23.9465	1775.51	29.0182	1775.51	29.0182	96.6094	Gehrels et al. (2011)
Esplanade 1	UA	Esplanade-7	631.246	0.225929	1739.12	28.9615	1777.84	23.17	1777.84	23.17	97.8225	Gehrels et al. (2011)
Esplanade 1	UA	Esplanade-14	239.925	0.214705	1780.64	18.0482	1783.51	18.5962	1783.51	18.5962	99.839	Gehrels et al. (2011)
Esplanade 1	UA	Esplanade-102	328.199	0.33886	1714.56	63.082	1786.75	28.4319	1786.75	28.4319	95.9599	Gehrels et al. (2011)
Esplanade 1	UA	Esplanade-45	706.271	0.536357	1701.03	51.4328	1793.66	18.9887	1793.66	18.9887	94.8359	Gehrels et al. (2011)
Esplanade 1	UA	Esplanade-58	193.299	0.437642	1809.43	30.2915	1795.82	28.5822	1795.82	28.5822	100.758	Gehrels et al. (2011)
Esplanade 1	UA	Esplanade-85	399.868	0.356974	1784.21	15.5859	1795.99	29.3068	1795.99	29.3068	99.3441	Gehrels et al. (2011)
Esplanade 1	UA	Esplanade-34	386.214	0.302633	1692.51	41.829	1799.73	36.2178	1799.73	36.2178	94.0426	Gehrels et al. (2011)
Esplanade 1	UA	Esplanade-67	138.959	0.514217	1785.1	15.5926	1821.45	54.0859	1821.45	54.0859	98.0044	Gehrels et al. (2011)
Esplanade 1	UA	Esplanade-56	149.579	0.41624	1778.23	19.2703	1825.99	40.0919	1825.99	40.0919	97.3846	Gehrels et al. (2011)
Esplanade 1	UA	Esplanade-5	525.13	0.275501	1507.04	68.2699	1850.47	18.0821	1850.47	18.0821	81.4411	Gehrels et al. (2011)
Esplanade 1	UA	Esplanade-9	255.866	0.652391	1810.51	31.0964	1857.98	47.3366	1857.98	47.3366	97.4452	Gehrels et al. (2011)
Esplanade 1	UA	Esplanade-3	41.9677	1.04538	1686.37	16.0257	1874.78	45.4757	1874.78	45.4757	89.95	Gehrels et al. (2011)
Esplanade 1	UA	Esplanade-32	172.102	0.477154	1880.58	20.5521	1888.62	28.6212	1888.62	28.6212	99.5742	Gehrels et al. (2011)
Esplanade 1	UA	Esplanade-94	122.27	0.50852	1880.86	28.0589	1891.81	25.5696	1891.81	25.5696	99.4212	Gehrels et al. (2011)
Esplanade 1	UA	Esplanade-86	173.384	0.282819	1917.34	16.585	1926.75	32.7902	1926.75	32.7902	99.5115	Gehrels et al. (2011)
Esplanade 1	UA	Esplanade-25	58.0154	2.11814	1796.49	23.5184	1929.9	22.7547	1929.9	22.7547	93.087	Gehrels et al. (2011)
Esplanade 1	UA	Esplanade-30	1294.27	0.0522572	1897.21	16.4353	1930.49	32.6287	1930.49	32.6287	98.2763	Gehrels et al. (2011)
Esplanade 1	UA	Esplanade-81	281.273	1.38036	1956.66	46.5788	1981.38	24.213	1981.38	24.213	98.7528	Gehrels et al. (2011)
Esplanade 1	UA	Esplanade-43	199.347	0.766176	1861.82	48.9984	2016.69	32.8382	2016.69	32.8382	92.3204	Gehrels et al. (2011)
Esplanade 1	UA	Esplanade-39	260.525	0.764327	1990.07	28.2516	2066.37	31.3804	2066.37	31.3804	96.3073	Gehrels et al. (2011)
Esplanade 1	UA	Esplanade-18	83.6362	0.65658	2486.87	50.5531	2486.86	49.0586	2486.86	49.0586	100.001	Gehrels et al. (2011)
Esplanade 1	UA	Esplanade-17	755.996	0.280278	2239.22	18.9169	2621.27	34.272	2621.27	34.272	85.4247	Gehrels et al. (2011)
Esplanade 1	UA	Esplanade-33	853.521	0.376584	2371.82	23.2178	2709.12	16.4947	2709.12	16.4947	87.5494	Gehrels et al. (2011)
Esplanade 1	UA	Esplanade-1	66.1996	0.943675	2719.24	29.5067	2741.6	26.3277	2741.6	26.3277	99.1846	Gehrels et al. (2011)
Esplanade 1	UA	Esplanade-104	625.862	0.263559	2749.07	22.3805	2747.94	31.5631	2747.94	31.5631	100.041	Gehrels et al. (2011)
Esplanade 1	UA	Esplanade-13	237.169	0.235257	2778.23	65.2307	2782.47	35.2348	2782.47	35.2348	99.8475	Gehrels et al. (2011)
Esplanade 1	UA	Esplanade-23	219.454	0.333639	2982.68	38.4444	2971.11	50.1341	2971.11	50.1341	100.389	Gehrels et al. (2011)
Esplanade 2	UA	06GC156-1	669.465	0.125141	382.823	3.71678	419.698	45.816	382.823	3.71678	91.2139	Gehrels et al. (2011)
Esplanade 2	UA	06GC156-10	154.953	0.670334	402.497	7.21849	477.585	145.179	402.497	7.21849	84.2774	Gehrels et al. (2011)
Esplanade 2	UA	06GC156-12	716.427	1.15113	435.38	4.92573	411.215	88.1529	435.38	4.92573	105.876	Gehrels et al. (2011)
Esplanade 2	UA	06GC156-68	115.582	0.668093	460.147	7.50543	395.885	132.852	460.147	7.50543	116.233	Gehrels et al. (2011)
Esplanade 2	UA	06GC156-83	218.354	1.02224	480.599	4.63121	460.683	29.3716	480.599	4.63121	104.323	Gehrels et al. (2011)
Esplanade 2	UA	06GC156-35	226.122	0.31733	665.314	7.20632	686.653	66.8457	665.314	7.20632	96.8923	Gehrels et al. (2011)
Esplanade 2	UA	06GC156-11	742.563	0.0683273	699.067	16.5624	764.505	62.602	699.067	16.5624	91.4405	Gehrels et al. (2011)
Esplanade 2	UA	06GC156-3	124.607	0.30395	949.685	8.83044	976.979	78.5039	976.979	78.5039	97.2063	Gehrels et al. (2011)
Esplanade 2	UA	06GC156-99	290.372	0.418083	975.336	9.05137	977.08	37.7108	977.08	37.7108	99.8215	Gehrels et al. (2011)
Esplanade 2	UA	06GC156-16	110.539	0.264294	988.126	25.3767	987.538	36.0296	987.538	36.0296	100.06	Gehrels et al. (2011)
Esplanade 2	UA	06GC156-76	242.118	1.2747	956.696	32.0964	1001.45	40.0827	1001.45	40.0827	95.5312	Gehrels et al. (2011)
Esplanade 2	UA	06GC156-37	95.9589	0.442003	1013.39	12.8472	1026.05	50.817	1026.05	50.817	98.7655	Gehrels et al. (2011)
Esplanade 2	UA	06GC156-78	103.762	0.696801	1014.62	9.38803	1038.65	36.4446	1038.65	36.4446	97.6864	Gehrels et al. (2011)
Esplanade 2	UA	06GC156-62	88.5979	0.873	1072.49	17.1917	1059.3	58.8392	1059.3	58.8392	101.245	Gehrels et al. (2011)
Esplanade 2	UA	06GC156-65	90.1904	0.973639	1077.1	12.5975	1061.33	40.4429	1061.33	40.4429	101.485	Gehrels et al. (2011)
Esplanade 2	UA	06GC156-54	29.3557	1.19854	1075.83	12.5839	1065.88	52.6635	1065.88	52.6635	100.934	Gehrels et al. (2011)
Esplanade 2	UA	06GC156-24	84.4573	0.155288	1020.44	9.43773	1089.21	24.4776	1089.21	24.4776	93.6859	Gehrels et al. (2011)
Esplanade 2	UA	06GC156-63	582.336	0.712753	1031.49	10.1039	1098.3	24.6175	1098.3	24.6175	93.9168	Gehrels et al. (2011)
Esplanade 2	UA	06GC156-4	80.5291	0.491198	1058.12	9.75846	1106.21	64.5963	1106.21	64.5963	95.6526	Gehrels et al. (2011)
Esplanade 2	UA	06GC156-28	115.494	0.431299	1090.31	10.0309	1115.39	46.1182	1115.39	46.1182	97.7521	Gehrels et al. (2011)
Esplanade 2	UA	06GC156-98	67.3464	1.54233	1109.32	30.2681	1116.17	26.8595	1116.17	26.8595	99.3862	Gehrels et al. (2011)
Esplanade 2	UA	06GC156-19	277.879	0.738216	1117.54	22.3677	1128.73	54.0025	1128.73	54.0025	99.0084	Gehrels et al. (2011)
Esplanade 2	UA	06GC156-7	157.325	0.40159	1161.09	10.6253	1141.97	32.4325	1141.97	32.4325	101.675	Gehrels et al. (2011)
Esplanade 2	UA	06GC156-53	87.6424	0.402409	1034.17	21.0206	1152.55	19.8698	1152.55	19.8698	89.7285	Gehrels et al. (2011)
Esplanade 2	UA	06GC156-49	85.0766	0.513858	1156.55	10.5874	1156.8	35.5253	1156.8	35.5253	99.979	Gehrels et al. (2011)
Esplanade 2	UA	06GC156-50	361.983	0.444649	1169.41	10.6948	1161.16	33.1143	1161.16	33.1143	100.711	Gehrels et al. (2011)
Esplanade 2	UA	06GC156-84	207.755	0.428948	1175.15	10.7426	1168.83	36.6409	1168.83	36.6409	100.54	Gehrels et al. (2011)
Esplanade 2	UA	06GC156-9	281.577	0.621183	1136.92	10.4231	1175.7	44.1255	1175.7	44.1255	96.7013	Gehrels et al. (2011)
Esplanade 2	UA	06GC156-27	169.923	0.35895	1168.9	10.6905	1176.88	29.2896	1176.88	29.2896	99.3221	Gehrels et al. (2011)
Esplanade 2	UA	06GC156-73	151.291	0.39899	1172.65	27.1262	1193.64	28.8199	1193.64	28.8199	98.241	Gehrels et al. (2011)
Esplanade 2	UA	06GC156-71	395.815	0.41259	1176.24	25.3742	1195.49	47.7457	1195.49	47.7457	98.3899	Gehrels et al. (2011)
Esplanade 2	UA	06GC156-30	229.997	0.558718	1206.29	11.0015	1198.77	52.6544	1198.77	52.6544	100.627	Gehrels et al. (2011)
Esplanade 2	UA	06GC156-29	110.61	1.08424	1244.18	28.4003	1220.2	50.7366	1220.2	50.7366	101.965	Gehrels et al. (2011)
Esplanade 2	UA	06GC156-32	400.929	0.661474	1190.72	28.8115	1271.73	46.2514	1271.73	46.2514	93.6302	Gehrels et al. (2011)
Esplanade 2	UA	06GC156-44	95.1096	1.13057	1118.62	23.0037	1285.29	21.4244	1285.29	21.4244	87.0325	Gehrels et al. (2011)
Esplanade 2	UA	06GC156-69	155.661	0.897366	1275.17	20.2471	1291.7	44.1845	1291.7	44.1845	98.7204	Gehrels et al. (2011)
Esplanade 2	UA	06GC156-46	161.217	0.439608	1328.03	12.0017	1303.89	19.6291	1303.89	19.6291	101.851	Gehrels et al. (2011)
Esplanade 2	UA	06GC156-18	240.437	0.299311	1283.91	21.5367	1309.92	65.4214	1309.92	65.4214	98.0144	Gehrels et al. (2011)
Esplanade 2	UA	06GC156-21	47.5106	0.683926	1296.6	11.9801	1335.83	27.3304	1335.83	27.3304	97.0632	Gehrels et al. (2011)
Esplanade 2	UA	06GC156-95	165.323	0.541586	1346.6	36.215	1351.3	44.7709	1351.3	44.7709	99.6522	Gehrels et al. (2011)
Esplanade 2	UA	06GC156-2	80.069	0.478796	1411.9	20.6681	1409.06	21.1574	1409.06	21.1574	100.202	Gehrels et al. (2011)
Esplanade 2	UA	06GC156-31	153.414	0.913525	1400.5	18.3787	1422.27	43.5765	1422.27	43.5765	98.469	Gehrels et al. (2011)
Esplanade 2	UA	06GC156-5	246.772	0.495017	1372.61	12.3632	1427.13	36.8551	1427.13	36.8551	96.1795	Gehrels et al. (2011)
Esplanade 2	UA	06GC156-100	137.966	1.70134	1458.48	30.5434	1434.27	38.9236	1434.27	38.9236	101.688	Gehrels et al. (2011)
Esplanade 2	UA	06GC156-20	130.34	0.76854	1466.86	35.0292	1448.69	42.6531	1448.69	42.6531	101.254	Gehrels et al. (2011)
Esplanade 2	UA	06GC156-80	181.124	0.461614	1428.48	12.8128	1449.25	58.2684	1449.25	58.2684	98.5668	Gehrels et al. (2011)
Esplanade 2	UA	06GC156-88	741.165	0.697323	1424.68	21.8579	1454.55	31.0121	1454.55	31.0121	97.947	Gehrels et al. (2011)
Esplanade 2	UA	06GC156-86	285.01	0.810599	1424.35	15.8468	1469.45	20.1255	1469.45	20.1255	96.9309	Gehrels et al. (2011)
Esplanade 2	UA	06GC156-61	115.936	1.03951	1573.84	23.3207	1607.96	35.066	1607.96	35.066	97.8775	Gehrels et al. (2011)
Esplanade 2	UA	06GC156-91	317.834	0.614335	1528.36	30.3436	1611.15	18.6357	1611.15	18.6357	94.8614	Gehrels et al. (2011)
Esplanade 2	UA	06GC156-6	130.269	0.345918	1630.56	14.4069	1621.53	30.8923	1621.53	30.8923	100.557	Gehrels et al. (2011)
Esplanade 2	UA	06GC156-56	222.088	0.598302	1628.14	22.5893	1624.42	25.2994	1624.42	25.2994	100.229	Gehrels et al. (2011)
Esplanade 2	UA	06GC156-57	127.137	0.448009	1582.51	19.0841	1626.02	47.0609	1626.02	47.0609	97.3244	Gehrels et al. (2011)
Esplanade 2	UA	06GC156-70	133.578	0.637564	1558.39	13.8433	1626.3	31.4343	1626.3	31.4343	95.8246	Gehrels et al. (2011)
Esplanade 2	UA	06GC156-52	158.846	0.937063	1620.16	16.3317	1626.92	55.4244	1626.92	55.4244	99.5846	Gehrels et al. (2011)
Esplanade 2	UA	06GC156-39	257.973	0.744505	1640.7	16.079	1628.42	33.0958	1628.42	33.0958	100.754	Gehrels et al. (2011)
[truncated: 1,042 more rows]

## Sheet: Horse Thief
Sample	Lab	Analysis ID	ppm U	Th/U	6/8 Age	1s	7/6 Age	1s	Best Age	1s	Conc	Data Source
[truncated: 1,024 more rows]

## Sheet: Morrison
Sample	Lab	Analysis ID	ppm U	Th/U	6/8 Age	1s	7/6 Age	1s	Best Age	1s	Conc	Data Source
[truncated: 169 more rows]

[truncated: 10 more sheets: Ontario Ridge, Pinto Mtn, Rainbow Gardens, Sespe clasts, Sespe sandstones, Shinumo, Tapeats, Troy, White Ledges, Zabriskie]
